# Supplementary material for: Probabilistic modeling methods for cell-free DNA methylation based cancer classification
Source: bioRxiv preprint, doi:10.1101/2021.06.18.444402, version 2 (2022-01-24)
Supplement: Supplementary file 3 [file 444402_file04.xlsx]

## Sheet: 10_6_AML
DMR	N_of_occurrence
chr1.10004101.10004400	6
chr1.1002001.1002300	94
chr1.100314001.100314300	1
chr1.100501501.100501800	2
chr1.10058701.10059000	11
chr1.100599301.100599600	2
chr1.1006801.1007100	31
chr1.100827301.100827600	1
chr1.10091701.10092000	1
chr1.10092301.10092600	1
chr1.1010401.1010700	4
chr1.1011301.1011600	1
chr1.1012801.1013100	34
chr1.1013101.1013400	4
chr1.1013401.1013700	4
chr1.1016101.1016400	1
chr1.1024501.1024800	11
chr1.10271701.10272000	2
chr1.1028701.1029000	3
chr1.1053001.1053300	97
chr1.10557301.10557600	2
chr1.10559401.10559700	3
chr1.10697101.10697400	4
chr1.10697401.10697700	1
chr1.10698901.10699200	58
chr1.10702201.10702500	8
chr1.10709701.10710000	6
chr1.1071601.1071900	1
chr1.10721401.10721700	11
chr1.10722001.10722300	1
chr1.10722901.10723200	3
chr1.10753201.10753500	1
chr1.10764001.10764300	1
chr1.10765501.10765800	10
chr1.10816201.10816500	5
chr1.108199501.108199800	1
chr1.109206301.109206600	1
chr1.109506301.109506600	46
chr1.1095301.1095600	1
chr1.109587001.109587300	1
chr1.109617301.109617600	6
chr1.109645201.109645500	18
chr1.109797601.109797900	11
chr1.1100401.1100700	2
chr1.110050501.110050800	1
chr1.1100701.1101000	3
chr1.110187301.110187600	1
chr1.110211601.110211900	4
chr1.110212501.110212800	5
chr1.11040001.11040300	1
chr1.110578501.110578800	1
chr1.110610301.110610600	84
chr1.1107301.1107600	35
chr1.1107601.1107900	77
chr1.1108801.1109100	1
chr1.110895601.110895900	10
chr1.1109401.1109700	8
chr1.110949001.110949300	1
chr1.1109701.1110000	7
chr1.111146701.111147000	1
chr1.11117101.11117400	1
chr1.111216001.111216300	1
chr1.1113901.1114200	1
chr1.11157601.11157900	1
chr1.111813601.111813900	1
chr1.112161601.112161900	1
chr1.1131601.1131900	24
chr1.113249101.113249400	3
chr1.113286001.113286300	1
chr1.113286301.113286600	54
chr1.11331301.11331600	18
chr1.113499301.113499600	91
chr1.113499601.113499900	43
chr1.1135501.1135800	2
chr1.1135801.1136100	4
chr1.1140601.1140900	2
chr1.1143001.1143300	50
chr1.1143301.1143600	2
chr1.114355501.114355800	1
chr1.1143601.1143900	3
chr1.1144501.1144800	8
chr1.1144801.1145100	29
chr1.1146601.1146900	3
chr1.1151101.1151400	2
chr1.1152001.1152300	3
chr1.115396501.115396800	10
chr1.115399501.115399800	3
chr1.115445401.115445700	1
chr1.11562601.11562900	1
chr1.11591101.11591400	4
chr1.11591401.11591700	1
chr1.11595001.11595300	11
chr1.1159501.1159800	1
chr1.11598301.11598600	72
chr1.116038201.116038500	1
chr1.1162201.1162500	9
chr1.116693101.116693400	16
chr1.116710201.116710500	78
chr1.116913901.116914200	2
chr1.11707801.11708100	1
chr1.117280801.117281100	3
chr1.1173001.1173300	10
chr1.1173601.1173900	1
chr1.117486901.117487200	1
chr1.117666301.117666600	3
chr1.11777401.11777700	5
chr1.11778001.11778300	1
chr1.11781601.11781900	2
chr1.118147501.118147800	1
chr1.11823301.11823600	2
chr1.1183201.1183500	34
chr1.1187401.1187700	1
chr1.1190701.1191000	1
chr1.119523301.119523600	12
chr1.11988301.11988600	2
chr1.120147601.120147900	6
chr1.120164701.120165000	7
chr1.120165001.120165300	1
chr1.120192601.120192900	1
chr1.120380401.120380700	3
chr1.1203901.1204200	4
chr1.12039601.12039900	1
chr1.12081301.12081600	2
chr1.120904801.120905100	10
chr1.120907801.120908100	12
chr1.1246501.1246800	13
chr1.1248301.1248600	11
chr1.12579001.12579300	2
chr1.12600301.12600600	2
chr1.12681901.12682200	10
chr1.1269001.1269300	22
chr1.1287601.1287900	1
chr1.1308301.1308600	2
chr1.1320601.1320900	1
chr1.1321801.1322100	1
chr1.1324201.1324500	1
chr1.132901.133200	13
chr1.133501.133800	1
chr1.133801.134100	10
chr1.1354501.1354800	1
chr1.1355701.1356000	1
chr1.1357801.1358100	1
chr1.13881001.13881300	7
chr1.1388701.1389000	2
chr1.1391401.1391700	44
chr1.1394101.1394400	1
chr1.1395301.1395600	1
chr1.1395901.1396200	14
chr1.1398001.1398300	3
chr1.1409101.1409400	8
chr1.142539301.142539600	30
chr1.142617901.142618200	21
chr1.142891501.142891800	2
chr1.142892401.142892700	2
chr1.142892701.142893000	3
chr1.142893001.142893300	31
chr1.143468401.143468700	3
chr1.143646601.143646900	11
chr1.143646901.143647200	34
chr1.143647201.143647500	1
chr1.143663701.143664000	203
chr1.143664001.143664300	19
chr1.144309601.144309900	1
chr1.144310501.144310800	2
chr1.1444201.1444500	21
chr1.144481201.144481500	1
chr1.144531601.144531900	1
chr1.1448401.1448700	1
chr1.1449001.1449300	1
chr1.1449901.1450200	3
chr1.1450201.1450500	1
chr1.145075801.145076100	3
chr1.145076101.145076400	2
chr1.145076401.145076700	166
chr1.145077001.145077300	1
chr1.145095601.145095900	5
chr1.145137601.145137900	1
chr1.145380601.145380900	3
chr1.145380901.145381200	1
chr1.145469101.145469400	1
chr1.145609201.145609500	1
chr1.145944001.145944300	13
chr1.145944301.145944600	13
chr1.145980301.145980600	3
chr1.145992001.145992300	1
chr1.146091601.146091900	2
chr1.1464901.1465200	1
chr1.1465201.1465500	1
chr1.146522401.146522700	5
chr1.146524201.146524500	2
chr1.146544001.146544300	17
chr1.1469401.1469700	1
chr1.147143401.147143700	1
chr1.147399601.147399900	2
chr1.147486001.147486300	2
chr1.147487201.147487500	1
chr1.147487501.147487800	55
chr1.147487801.147488100	2
chr1.147504601.147504900	8
chr1.147505801.147506100	5
chr1.147506101.147506400	3
chr1.147521701.147522000	1
chr1.147522001.147522300	3
chr1.1476001.1476300	1
chr1.147618601.147618900	9
chr1.147630001.147630300	6
chr1.147718201.147718500	6
chr1.147718501.147718800	70
chr1.147718801.147719100	9
chr1.1477201.1477500	7
chr1.147776101.147776400	1
chr1.147782101.147782400	1
chr1.147825901.147826200	1
chr1.147826201.147826500	1
chr1.147835201.147835500	1
chr1.1478401.1478700	3
chr1.148002301.148002600	2
chr1.148554901.148555200	1
chr1.148555201.148555500	2
chr1.148602301.148602600	1
chr1.148603201.148603500	1
chr1.148758601.148758900	4
chr1.148761901.148762200	9
chr1.148853701.148854000	1
chr1.148855201.148855500	4
chr1.148864501.148864800	2
chr1.148901701.148902000	1
chr1.148902001.148902300	1
chr1.149029201.149029500	104
chr1.1490701.1491000	1
chr1.149222101.149222400	2
chr1.149284801.149285100	4
chr1.149286301.149286600	5
chr1.149286601.149286900	1
chr1.149287201.149287500	2
chr1.149332801.149333100	10
chr1.149333101.149333400	42
chr1.149333701.149334000	51
chr1.149334001.149334300	93
chr1.149397901.149398200	4
chr1.149607901.149608200	2
chr1.149615701.149616000	1
chr1.149671201.149671500	22
chr1.149671501.149671800	4
chr1.149672701.149673000	25
chr1.149673001.149673300	1
chr1.149673301.149673600	10
chr1.149673601.149673900	1
chr1.149718301.149718600	19
chr1.149718901.149719200	43
chr1.149719201.149719500	15
chr1.149719501.149719800	48
chr1.149765401.149765700	3
chr1.1497901.1498200	1
chr1.149872801.149873100	2
chr1.149978401.149978700	1
chr1.150295201.150295500	1
chr1.150531001.150531300	9
chr1.150851101.150851400	1
chr1.150896701.150897000	3
chr1.151019401.151019700	6
chr1.151104301.151104600	8
chr1.151104601.151104900	4
chr1.151168501.151168800	11
chr1.151184701.151185000	6
chr1.15127801.15128100	3
chr1.15128101.15128400	3
chr1.15128401.15128700	1
chr1.151300801.151301100	8
chr1.151443901.151444200	1
chr1.151586701.151587000	1
chr1.151737901.151738200	3
chr1.151884301.151884600	5
chr1.152080801.152081100	1
chr1.152161501.152161800	25
chr1.15240001.15240300	6
chr1.15249001.15249300	2
chr1.1534201.1534500	3
chr1.153583501.153583800	4
chr1.153630301.153630600	7
chr1.153633001.153633300	12
chr1.153649501.153649800	1
chr1.153653101.153653400	1
chr1.153654001.153654300	1
chr1.153704401.153704700	4
chr1.15374101.15374400	1
chr1.153754201.153754500	6
chr1.153756901.153757200	17
chr1.15375901.15376200	3
chr1.15377401.15377700	4
chr1.153915001.153915300	1
chr1.153938401.153938700	4
chr1.153951901.153952200	1
chr1.154475401.154475700	4
chr1.154578601.154578900	2
chr1.154584001.154584300	2
chr1.154785901.154786200	2
chr1.154989001.154989300	4
chr1.155035201.155035500	49
chr1.155035501.155035800	323
chr1.155098201.155098500	1
chr1.155098501.155098800	5
chr1.155148001.155148300	4
chr1.155218501.155218800	1
chr1.1552201.1552500	1
chr1.155222701.155223000	4
chr1.155223001.155223300	1
chr1.155226301.155226600	4
chr1.155241301.155241600	6
chr1.155248801.155249100	4
chr1.155264701.155265000	1
chr1.155265301.155265600	14
chr1.1552801.1553100	43
chr1.155290801.155291100	6
chr1.155578801.155579100	2
chr1.155579101.155579400	7
chr1.155655901.155656200	2
chr1.155659501.155659800	84
chr1.155717701.155718000	3
chr1.15585301.15585600	1
chr1.156048901.156049200	4
chr1.156053101.156053400	1
chr1.156074101.156074400	1
chr1.156185401.156185700	19
chr1.156261001.156261300	342
chr1.156261301.156261600	48
chr1.156308701.156309000	10
chr1.156337501.156337800	2
chr1.156388201.156388500	1
chr1.156424801.156425100	2
chr1.1564501.1564800	3
chr1.156471601.156471900	10
chr1.1564801.1565100	1
chr1.156542701.156543000	2
chr1.156543601.156543900	3
chr1.156612601.156612900	1
chr1.156735301.156735600	1
chr1.1567501.1567800	1
chr1.1567801.1568100	11
chr1.156816601.156816900	5
chr1.156818701.156819000	2
chr1.156880501.156880800	4
chr1.157075801.157076100	2
chr1.157082701.157083000	3
chr1.157948801.157949100	114
chr1.157949101.157949400	1
chr1.157965601.157965900	2
chr1.15912301.15912600	3
chr1.15912601.15912900	12
chr1.15931801.15932100	11
chr1.15942601.15942900	4
chr1.159652501.159652800	6
chr1.159898201.159898500	23
chr1.159900601.159900900	2
chr1.1600501.1600800	1
chr1.160054501.160054800	1
chr1.160233001.160233300	2
chr1.1602601.1602900	1
chr1.160371901.160372200	1
chr1.160389001.160389300	1
chr1.16051501.16051800	1
chr1.16054201.16054500	34
chr1.16055401.16055700	2
chr1.16059601.16059900	6
chr1.160615201.160615500	1
chr1.16071001.16071300	1
chr1.16073701.16074000	3
chr1.160769701.160770000	1
chr1.160771801.160772100	7
chr1.160772101.160772400	8
chr1.1608601.1608900	2
chr1.1608901.1609200	2
chr1.1609801.1610100	11
chr1.161010301.161010600	2
chr1.161085901.161086200	1
chr1.161086801.161087100	1
chr1.161227501.161227800	1
chr1.16125301.16125600	3
chr1.161282701.161283000	1
chr1.161348701.161349000	1
chr1.161361301.161361600	1
chr1.161410501.161410800	27
chr1.161410801.161411100	114
chr1.161412601.161412900	55
chr1.161417701.161418000	23
chr1.161418301.161418600	20
chr1.161419801.161420100	8
chr1.161424901.161425200	3
chr1.161425501.161425800	26
chr1.161425801.161426100	85
chr1.161433601.161433900	2
chr1.161434801.161435100	1
chr1.161439301.161439600	1
chr1.161439601.161439900	1
chr1.161439901.161440200	1
chr1.161440501.161440800	11
chr1.161440801.161441100	13
chr1.161441101.161441400	2
chr1.161442001.161442300	1
chr1.161501701.161502000	1
chr1.161583001.161583300	1
chr1.161973301.161973600	7
chr1.161992501.161992800	1
chr1.1621801.1622100	1
chr1.16227601.16227900	18
chr1.162339001.162339300	31
chr1.162533401.162533700	5
chr1.1626901.1627200	1
chr1.16272301.16272600	1
chr1.16397401.16397700	4
chr1.1642801.1643100	1
chr1.164291101.164291400	3
chr1.1645801.1646100	17
chr1.16473001.16473300	18
chr1.16479301.16479600	5
chr1.165084901.165085200	1
chr1.16532401.16532700	2
chr1.1654801.1655100	1
chr1.16553701.16554000	85
chr1.16554001.16554300	61
chr1.16554301.16554600	71
chr1.16554901.16555200	1
chr1.165597601.165597900	3
chr1.16565401.16565700	1
chr1.1657201.1657500	13
chr1.1658101.1658400	7
chr1.16644901.16645200	1
chr1.166847701.166848000	1
chr1.166889701.166890000	1
chr1.166890601.166890900	2
chr1.167091601.167091900	36
chr1.1672201.1672500	2
chr1.167599501.167599800	5
chr1.167649301.167649600	2
chr1.16768501.16768800	1
chr1.16768801.16769100	1
chr1.1678801.1679100	78
chr1.1679401.1679700	10
chr1.1680301.1680600	1
chr1.1684201.1684500	1
chr1.16847101.16847400	108
chr1.16847401.16847700	1
chr1.16847701.16848000	1
chr1.16860301.16860600	1
chr1.16861501.16861800	3
chr1.16861801.16862100	6
chr1.1686301.1686600	1
chr1.16863601.16863900	9
chr1.169074001.169074300	7
chr1.1693201.1693500	1
chr1.169396501.169396800	1
chr1.16969201.16969500	6
chr1.16974001.16974300	78
chr1.16974301.16974600	23
chr1.16974901.16975200	2
chr1.16983301.16983600	3
chr1.16985101.16985400	1
chr1.17006401.17006700	1
chr1.17007001.17007300	13
chr1.17017801.17018100	1
chr1.17021401.17021700	11
chr1.17022901.17023200	1
chr1.17064901.17065200	1
chr1.17065501.17065800	2
chr1.17067901.17068200	5
chr1.17074501.17074800	1
chr1.17077501.17077800	1
chr1.17086501.17086800	1
chr1.17088901.17089200	1
chr1.171170701.171171000	2
chr1.171639901.171640200	2
chr1.171753301.171753600	2
chr1.17184901.17185200	2
chr1.17186401.17186700	3
chr1.17199901.17200200	1
chr1.17200201.17200500	32
chr1.17200501.17200800	1
chr1.172324801.172325100	1
chr1.17242801.17243100	2
chr1.172722001.172722300	7
chr1.17292601.17292900	1
chr1.17330401.17330700	3
chr1.17331001.17331300	4
chr1.17333401.17333700	1
chr1.173794801.173795100	1
chr1.173795101.173795400	7
chr1.17382301.17382600	18
chr1.173992801.173993100	7
chr1.174131101.174131400	1
chr1.17475901.17476200	102
chr1.17476201.17476500	18
chr1.175048201.175048500	3
chr1.175568101.175568400	7
chr1.175568401.175568700	4
chr1.175891201.175891500	1
chr1.17736001.17736300	5
chr1.17746801.17747100	1
chr1.17747701.17748000	5
chr1.17748301.17748600	8
chr1.17762101.17762400	14
chr1.178008001.178008300	3
chr1.178514101.178514400	5
chr1.17868601.17868900	5
chr1.178994101.178994400	10
chr1.179049601.179049900	2
chr1.179053201.179053500	10
chr1.179145001.179145300	1
chr1.179334001.179334300	4
chr1.179334301.179334600	9
chr1.17951401.17951700	2
chr1.179561101.179561400	1
chr1.179607001.179607300	25
chr1.17962501.17962800	5
chr1.181382101.181382400	1
chr1.182580601.182580900	13
chr1.183386101.183386400	1
chr1.183387301.183387600	1
chr1.1841401.1841700	104
chr1.1841701.1842000	1
chr1.184725601.184725900	2
chr1.1849201.1849500	2
chr1.1851601.1851900	1
chr1.1851901.1852200	93
chr1.1852201.1852500	46
chr1.1852501.1852800	1
chr1.185344501.185344800	3
chr1.1857901.1858200	2
chr1.186624001.186624300	1
chr1.18702901.18703200	1
chr1.1872901.1873200	12
chr1.1874101.1874400	2
chr1.18807301.18807600	3
chr1.1884601.1884900	2
chr1.1887601.1887900	2
chr1.1887901.1888200	21
chr1.1888201.1888500	37
chr1.18954901.18955200	2
chr1.18961801.18962100	2
chr1.1896301.1896600	2
chr1.19044901.19045200	5
chr1.19108501.19108800	2
chr1.1913701.1914000	15
chr1.19211401.19211700	2
chr1.19211701.19212000	2
chr1.192446101.192446400	8
chr1.192778501.192778800	40
chr1.192778801.192779100	140
chr1.19285201.19285500	1
chr1.1935601.1935900	1
chr1.1949701.1950000	21
chr1.19533901.19534200	1
chr1.1956901.1957200	11
chr1.1957201.1957500	1
chr1.19576201.19576500	5
chr1.19600501.19600800	8
chr1.19614901.19615200	2
chr1.1961701.1962000	1
chr1.1962001.1962300	1
chr1.196379701.196380000	1
chr1.19664101.19664400	74
chr1.196845901.196846200	2
chr1.19701301.19701600	10
chr1.1972801.1973100	23
chr1.1973101.1973400	158
chr1.1974901.1975200	2
chr1.1976701.1977000	2
chr1.1977001.1977300	5
chr1.197890501.197890800	2
chr1.197892301.197892600	2
chr1.1979401.1979700	9
chr1.198124501.198124800	14
chr1.198648301.198648600	3
chr1.198648601.198648900	1
chr1.1992001.1992300	2
chr1.200005201.200005500	4
chr1.200005501.200005800	3
chr1.20004901.20005200	5
chr1.20005501.20005800	6
chr1.200272201.200272500	4
chr1.2003701.2004000	2
chr1.2004001.2004300	3
chr1.2006401.2006700	229
chr1.200715901.200716200	2
chr1.200839501.200839800	1
chr1.200840101.200840400	1
chr1.200841601.200841900	1
chr1.200842501.200842800	71
chr1.200843101.200843400	169
chr1.200880601.200880900	1
chr1.200969101.200969400	87
chr1.201084001.201084300	7
chr1.201140701.201141000	46
chr1.201244501.201244800	3
chr1.201253501.201253800	3
chr1.202053901.202054200	26
chr1.20207701.20208000	1
chr1.202161301.202161600	1
chr1.202163701.202164000	21
chr1.202216801.202217100	6
chr1.202217101.202217400	2
chr1.202217701.202218000	5
chr1.2027101.2027400	1
chr1.202856401.202856700	41
chr1.202897501.202897800	7
chr1.202996201.202996500	1
chr1.202996801.202997100	10
chr1.203457601.203457900	1
chr1.204040201.204040500	3
chr1.204058201.204058500	1
chr1.2040901.2041200	16
chr1.2041501.2041800	3
chr1.204226201.204226500	15
chr1.2042401.2042700	4
chr1.204254701.204255000	1
chr1.204358201.204358500	5
chr1.204486901.204487200	3
chr1.204531001.204531300	1
chr1.2046001.2046300	1
chr1.204652201.204652500	1
chr1.2047501.2047800	1
chr1.204916201.204916500	3
chr1.204951301.204951600	3
chr1.205041001.205041300	4
chr1.20505901.20506200	1
chr1.205270201.205270500	29
chr1.205413301.205413600	1
chr1.205416001.205416300	2
chr1.205449601.205449900	1
chr1.205630801.205631100	1
chr1.205631401.205631700	4
chr1.20569501.20569800	1
chr1.205721101.205721400	6
chr1.205784101.205784400	19
chr1.205818901.205819200	10
chr1.206223001.206223300	6
chr1.2062801.2063100	1
chr1.2063701.2064000	2
chr1.206682901.206683200	1
chr1.206683201.206683500	1
chr1.206844001.206844300	4
chr1.206844301.206844600	1
chr1.206857501.206857800	2
chr1.206966401.206966700	7
chr1.207064201.207064500	7
chr1.207842701.207843000	3
chr1.2081401.2081700	2
chr1.208419601.208419900	1
chr1.20962201.20962500	2
chr1.209832901.209833200	1
chr1.20985301.20985600	8
chr1.20989501.20989800	1
chr1.209978701.209979000	1
chr1.209979001.209979300	11
chr1.210002101.210002400	1
chr1.21028801.21029100	2
chr1.21032401.21032700	3
chr1.21045901.21046200	8
chr1.210467401.210467700	2
chr1.21115501.21115800	1
chr1.211381501.211381800	1
chr1.211434901.211435200	61
chr1.2114401.2114700	4
chr1.211501501.211501800	3
chr1.211554901.211555200	1
chr1.2116501.2116800	10
chr1.211653001.211653300	1
chr1.2117101.2117400	1
chr1.211849501.211849800	3
chr1.212585401.212585700	1
chr1.212658001.212658300	2
chr1.212865301.212865600	1
chr1.212963701.212964000	78
chr1.213032401.213032700	8
chr1.213088201.213088500	5
chr1.213223201.213223500	51
chr1.213223501.213223800	1
chr1.213224101.213224400	1
chr1.213562201.213562500	3
chr1.2143801.2144100	1
chr1.2145001.2145300	6
chr1.21504001.21504300	1
chr1.21550801.21551100	6
chr1.2157901.2158200	6
chr1.2162701.2163000	1
chr1.217313701.217314000	1
chr1.21755101.21755400	1
chr1.21757501.21757800	4
chr1.21757801.21758100	1
chr1.21762901.21763200	110
chr1.21894901.21895200	2
chr1.21929701.21930000	6
chr1.21930601.21930900	1
chr1.21930901.21931200	1
chr1.21931201.21931500	5
chr1.21946501.21946800	3
chr1.21948301.21948600	17
chr1.219632401.219632700	1
chr1.21967801.21968100	2
chr1.21975901.21976200	1
chr1.21977401.21977700	1
chr1.220102801.220103100	1
chr1.220221001.220221300	9
chr1.220265401.220265700	5
chr1.2209801.2210100	1
chr1.221057701.221058000	2
chr1.221060401.221060700	1
chr1.22141801.22142100	3
chr1.22149301.22149600	7
chr1.22155301.22155600	6
chr1.221927701.221928000	6
chr1.22211401.22211700	3
chr1.22211701.22212000	10
chr1.22231501.22231800	5
chr1.2223301.2223600	1
chr1.222788701.222789000	2
chr1.222789901.222790200	5
chr1.222819301.222819600	1
chr1.222819601.222819900	3
chr1.222883501.222883800	1
chr1.2230501.2230800	8
chr1.2232301.2232600	3
chr1.2232601.2232900	5
chr1.223356601.223356900	19
chr1.223568101.223568400	21
chr1.223739701.223740000	1
chr1.223741201.223741500	7
chr1.223742701.223743000	10
chr1.223934401.223934700	2
chr1.224031001.224031300	1
chr1.224182201.224182500	3
chr1.224369701.224370000	5
chr1.2244301.2244600	1
chr1.22444801.22445100	1
chr1.22455601.22455900	1
chr1.22456201.22456500	16
chr1.2249101.2249400	1
chr1.2251801.2252100	1
chr1.225865201.225865500	1
chr1.2259001.2259300	22
chr1.2259601.2259900	7
chr1.226014301.226014600	9
chr1.226073401.226073700	10
chr1.22611901.22612200	1
chr1.22612501.22612800	1
chr1.226188301.226188600	2
chr1.226315201.226315500	6
chr1.2268001.2268300	1
chr1.226830901.226831200	101
chr1.226890001.226890300	4
chr1.226891501.226891800	3
chr1.22692001.22692300	1
chr1.226924501.226924800	1
chr1.227060701.227061000	1
chr1.227163301.227163600	1
chr1.227315701.227316000	1
chr1.227681101.227681400	11
chr1.227681701.227682000	27
chr1.227682601.227682900	4
chr1.227682901.227683200	1
chr1.227696401.227696700	1
chr1.227730601.227730900	5
chr1.227748301.227748600	15
chr1.227748901.227749200	1
chr1.227753401.227753700	1
chr1.22778101.22778400	2
chr1.227973001.227973300	1
chr1.227973601.227973900	99
chr1.227977801.227978100	1
chr1.228003601.228003900	5
chr1.228075301.228075600	35
chr1.228133801.228134100	2
chr1.228137101.228137400	65
chr1.228160801.228161100	1
chr1.22829101.22829400	4
chr1.228345601.228345900	6
chr1.228347701.228348000	1
chr1.228364201.228364500	7
chr1.228398701.228399000	3
chr1.228399901.228400200	1
chr1.228406801.228407100	1
chr1.228460501.228460800	13
chr1.228465301.228465600	1
chr1.228465901.228466200	1
chr1.228474901.228475200	1
chr1.228560101.228560400	9
chr1.228563701.228564000	1
chr1.228582301.228582600	2
chr1.228647701.228648000	1
chr1.228672601.228672900	1
chr1.228744001.228744300	1
chr1.228752701.228753000	1
chr1.228754801.228755100	1
chr1.228759601.228759900	1
chr1.228786001.228786300	7
chr1.228890401.228890700	1
chr1.22904701.22905000	1
chr1.22925101.22925400	9
chr1.22927801.22928100	1
chr1.22928701.22929000	4
chr1.22929001.22929300	2
chr1.229365901.229366200	1
chr1.229567801.229568100	10
chr1.22973701.22974000	91
chr1.229759201.229759500	1
chr1.23002501.23002800	1
chr1.230241301.230241600	6
chr1.230250001.230250300	1
chr1.2303701.2304000	2
chr1.23038801.23039100	41
chr1.23039101.23039400	16
chr1.230407501.230407800	5
chr1.230414701.230415000	9
chr1.230469301.230469600	1
chr1.230493301.230493600	2
chr1.230776501.230776800	1
chr1.231006001.231006300	2
chr1.231036901.231037200	2
chr1.231178501.231178800	2
chr1.2314501.2314800	1
chr1.231531901.231532200	1
chr1.231666301.231666600	79
chr1.2318401.2318700	1
chr1.231939301.231939600	15
chr1.2332501.2332800	3
chr1.23343901.23344200	2
chr1.2340301.2340600	14
chr1.2343001.2343300	1
chr1.234342001.234342300	2
chr1.234367201.234367500	1
chr1.234507901.234508200	10
chr1.2346601.2346900	1
chr1.234908701.234909000	1
chr1.234914101.234914400	2
chr1.235011301.235011600	101
chr1.235125901.235126200	6
chr1.235152001.235152300	1
chr1.235289701.235290000	1
chr1.235322401.235322700	26
chr1.235326601.235326900	1
chr1.235804801.235805100	1
chr1.235805401.235805700	18
chr1.2358901.2359200	3
chr1.2360701.2361000	2
chr1.2361001.2361300	1
chr1.236307601.236307900	4
chr1.236446501.236446800	2
chr1.23673001.23673300	1
chr1.236765401.236765700	6
chr1.236847601.236847900	1
chr1.236848801.236849100	4
chr1.23763601.23763900	22
chr1.237833401.237833700	7
chr1.2385601.2385900	1
chr1.2385901.2386200	1
chr1.2386501.2386800	9
chr1.2386801.2387100	4
chr1.23945101.23945400	1
chr1.2397901.2398200	4
chr1.240163501.240163800	1
chr1.24016801.24017100	4
chr1.240371401.240371700	8
chr1.240372901.240373200	10
chr1.240568501.240568800	1
chr1.240569101.240569400	17
chr1.240656401.240656700	7
chr1.240874201.240874500	10
chr1.2409301.2409600	1
chr1.2409601.2409900	1
chr1.24118801.24119100	44
chr1.2415301.2415600	1
chr1.241696201.241696500	25
chr1.2417401.2417700	1
chr1.24228601.24228900	2
chr1.242609701.242610000	1
chr1.242690401.242690700	14
chr1.24284401.24284700	1
chr1.2432101.2432400	1
chr1.243265201.243265500	3
chr1.243265501.243265800	1
chr1.243584401.243584700	3
chr1.2436001.2436300	1
chr1.2436301.2436600	1
chr1.243649801.243650100	2
chr1.243650701.243651000	1
chr1.243653701.243654000	2
chr1.2438101.2438400	5
chr1.2441701.2442000	2
chr1.2442001.2442300	3
chr1.2443201.2443500	6
chr1.245217601.245217900	1
chr1.2454301.2454600	1
chr1.245496601.245496900	1
chr1.2456401.2456700	1
chr1.245742901.245743200	5
chr1.245751301.245751600	2
chr1.245752501.245752800	2
chr1.245810701.245811000	28
chr1.245850301.245850600	14
chr1.245851801.245852100	2
chr1.2460001.2460300	1
chr1.246138001.246138300	78
chr1.246138901.246139200	2
chr1.2465101.2465400	12
chr1.246671401.246671700	5
chr1.246672601.246672900	1
chr1.246728401.246728700	1
chr1.246783001.246783300	1
chr1.246950101.246950400	2
chr1.246952201.246952500	1
chr1.246958501.246958800	12
chr1.247266301.247266600	14
chr1.247274101.247274400	1
chr1.2472901.2473200	1
chr1.247466101.247466400	6
chr1.247496101.247496400	13
chr1.247539901.247540200	1
chr1.247680901.247681200	2
chr1.247694401.247694700	1
chr1.247803001.247803300	6
chr1.248099401.248099700	2
chr1.248100601.248100900	6
chr1.24831601.24831900	7
chr1.248855401.248855700	5
chr1.249105601.249105900	1
chr1.249106201.249106500	55
chr1.249142201.249142500	1
chr1.249165301.249165600	39
chr1.249169201.249169500	3
chr1.25069501.25069800	15
chr1.25070701.25071000	2
chr1.25071001.25071300	12
chr1.25230601.25230900	1
chr1.25246801.25247100	1
chr1.25247101.25247400	1
chr1.25257901.25258200	1
chr1.25260001.25260300	1
chr1.2529001.2529300	21
chr1.25292401.25292700	4
chr1.25319101.25319400	1
chr1.25348501.25348800	1
chr1.2538901.2539200	1
chr1.2561101.2561400	31
chr1.26098201.26098500	2
chr1.26149201.26149500	7
chr1.26186701.26187000	7
chr1.26204401.26204700	1
chr1.26435101.26435400	2
chr1.26491201.26491500	1
chr1.26497501.26497800	1
chr1.26497801.26498100	2
chr1.26616301.26616600	16
chr1.26661301.26661600	1
chr1.26688301.26688600	25
chr1.2707501.2707800	1
chr1.27142801.27143100	1
chr1.27144001.27144300	1
chr1.27145201.27145500	3
chr1.2717401.2717700	2
chr1.27228001.27228300	1
chr1.27333001.27333300	5
chr1.27339601.27339900	1
chr1.27340201.27340500	80
chr1.27384301.27384600	2
chr1.27528001.27528300	13
chr1.27675601.27675900	33
chr1.27675901.27676200	1
chr1.27676201.27676500	62
chr1.27676501.27676800	44
chr1.27676801.27677100	6
chr1.27678901.27679200	7
chr1.27685501.27685800	73
chr1.27720601.27720900	1
chr1.2778901.2779200	1
chr1.27817501.27817800	2
chr1.27896101.27896400	16
chr1.27896701.27897000	4
chr1.28197301.28197600	6
chr1.28283401.28283700	2
chr1.28284901.28285200	14
chr1.2829601.2829900	8
chr1.28415401.28415700	1
chr1.2845801.2846100	1
chr1.28461901.28462200	1
chr1.28481401.28481700	1
chr1.2849701.2850000	1
chr1.2851501.2851800	4
chr1.28558201.28558500	3
chr1.28584001.28584300	9
chr1.28641601.28641900	5
chr1.28641901.28642200	1
chr1.2876701.2877000	2
chr1.28855501.28855800	3
chr1.2886301.2886600	18
chr1.2886601.2886900	61
chr1.28878001.28878300	1
chr1.2888401.2888700	8
chr1.28920001.28920300	2
chr1.29064601.29064900	1
chr1.2917801.2918100	5
chr1.29189101.29189400	1
chr1.29189401.29189700	1
chr1.29189701.29190000	14
chr1.2919301.2919600	1
chr1.2919601.2919900	1
chr1.2920201.2920500	1
chr1.2920501.2920800	17
chr1.2929801.2930100	9
chr1.2937001.2937300	1
chr1.2938501.2938800	15
chr1.29447401.29447700	7
chr1.29509201.29509500	43
chr1.2978701.2979000	8
chr1.2980801.2981100	3
chr1.2983801.2984100	1
chr1.2989501.2989800	4
chr1.2991601.2991900	3
chr1.2992501.2992800	82
chr1.2995801.2996100	4
chr1.2997001.2997300	2
chr1.3026401.3026700	1
chr1.3029401.3029700	1
chr1.3029701.3030000	1
chr1.3038401.3038700	6
chr1.3058201.3058500	4
chr1.3058501.3058800	5
chr1.3071701.3072000	64
chr1.3072001.3072300	29
chr1.3074101.3074400	14
chr1.3100501.3100800	6
chr1.31188901.31189200	1
chr1.31193701.31194000	7
chr1.31238101.31238400	3
chr1.31247701.31248000	2
chr1.3146401.3146700	1
chr1.3146701.3147000	1
chr1.3150001.3150300	2
chr1.3159601.3159900	10
chr1.3159901.3160200	1
chr1.31627201.31627500	4
chr1.3163201.3163500	1
chr1.3164101.3164400	3
chr1.3164401.3164700	54
chr1.3165901.3166200	3
chr1.3180601.3180900	5
chr1.3180901.3181200	12
chr1.3186301.3186600	11
chr1.3186601.3186900	2
chr1.31887001.31887300	6
chr1.31904401.31904700	94
chr1.31904701.31905000	3
chr1.31947601.31947900	9
chr1.3204301.3204600	47
chr1.32050201.32050500	2
chr1.32052301.32052600	6
chr1.32171101.32171400	13
chr1.32206801.32207100	6
chr1.32221501.32221800	1
chr1.3227701.3228000	5
chr1.3229501.3229800	45
chr1.3239701.3240000	14
chr1.3240001.3240300	177
chr1.32411701.32412000	4
chr1.3251701.3252000	1
chr1.32574601.32574900	2
chr1.32646601.32646900	15
chr1.32647201.32647500	2
chr1.32688901.32689200	1
chr1.3269401.3269700	4
chr1.3273001.3273300	1
chr1.3273901.3274200	1
chr1.32815201.32815500	2
chr1.32826301.32826600	2
chr1.32827201.32827500	2
chr1.3290401.3290700	1
chr1.3297001.3297300	3
chr1.3305101.3305400	2
chr1.3307201.3307500	2
chr1.3309901.3310200	200
chr1.3310201.3310500	74
chr1.3310501.3310800	242
chr1.3310801.3311100	1
chr1.33114601.33114900	5
chr1.3319801.3320100	1
chr1.3320701.3321000	11
chr1.33219901.33220200	104
chr1.33220201.33220500	287
chr1.33236101.33236400	1
chr1.33236701.33237000	1
chr1.33281401.33281700	2
chr1.3332101.3332400	1
chr1.33350101.33350400	20
chr1.33360901.33361200	21
chr1.3339901.3340200	85
chr1.3340201.3340500	4
chr1.33516901.33517200	66
chr1.33517201.33517500	103
chr1.3353401.3353700	1
chr1.33625501.33625800	12
chr1.33720001.33720300	3
chr1.3372901.3373200	1
chr1.33772501.33772800	25
chr1.33772801.33773100	16
chr1.33939001.33939300	21
chr1.3394201.3394500	16
chr1.3394501.3394800	7
chr1.3394801.3395100	17
chr1.3427801.3428100	1
chr1.3428701.3429000	5
chr1.3436801.3437100	1
chr1.3445501.3445800	2
chr1.3457801.3458100	5
chr1.3499201.3499500	130
chr1.3510901.3511200	4
chr1.3512701.3513000	1
chr1.35226901.35227200	1
chr1.35258101.35258400	27
chr1.3525901.3526200	2
chr1.3555901.3556200	4
chr1.3562501.3562800	22
chr1.3562801.3563100	2
chr1.35660701.35661000	1
chr1.3570001.3570300	1
chr1.3570901.3571200	1
chr1.3571201.3571500	1
chr1.3571501.3571800	1
chr1.36038401.36038700	23
chr1.36038701.36039000	189
chr1.36039001.36039300	109
chr1.36039301.36039600	4
chr1.3605101.3605400	1
chr1.3608401.3608700	1
chr1.36108601.36108900	3
chr1.36108901.36109200	6
chr1.3621901.3622200	33
chr1.36236701.36237000	1
chr1.3624001.3624300	12
chr1.3625201.3625500	10
chr1.3625501.3625800	3
chr1.36348301.36348600	7
chr1.3647701.3648000	2
chr1.36553201.36553500	75
chr1.36590401.36590700	1
chr1.36591301.36591600	8
chr1.36614101.36614400	1
chr1.3662401.3662700	3
chr1.3663301.3663600	1
chr1.36715501.36715800	2
chr1.36774901.36775200	1
chr1.36785101.36785400	1
chr1.36787201.36787500	25
chr1.36787501.36787800	1
chr1.36787801.36788100	1
chr1.36814501.36814800	1
chr1.36916801.36917100	2
chr1.36952801.36953100	1
chr1.3702601.3702900	5
chr1.3711601.3711900	4
chr1.3714601.3714900	5
chr1.3714901.3715200	1
chr1.3771001.3771300	1
chr1.37783201.37783500	1
chr1.37981801.37982100	2
chr1.38018701.38019000	3
chr1.38021101.38021400	9
chr1.38021701.38022000	1
chr1.3809101.3809400	2
chr1.38102701.38103000	2
chr1.38159701.38160000	11
chr1.3818101.3818400	2
chr1.38217001.38217300	1
chr1.3824101.3824400	2
chr1.38257201.38257500	2
chr1.38327101.38327400	1
chr1.38456101.38456400	1
chr1.38463001.38463300	1
chr1.38476801.38477100	1
chr1.38513401.38513700	26
chr1.38573701.38574000	1
chr1.39323101.39323400	10
chr1.39326701.39327000	1
chr1.39327301.39327600	8
chr1.39455101.39455400	5
chr1.39545401.39545700	9
chr1.39596401.39596700	1
chr1.39955801.39956100	1
chr1.39959101.39959400	3
chr1.39979501.39979800	2
chr1.40043101.40043400	6
chr1.40151701.40152000	2
chr1.40205101.40205400	2
chr1.40237801.40238100	6
chr1.40255201.40255500	4
chr1.40346701.40347000	3
chr1.40565101.40565400	3
chr1.40601101.40601400	1
chr1.40769701.40770000	4
chr1.40770001.40770300	1
chr1.4079401.4079700	1
chr1.40841701.40842000	1
chr1.40972201.40972500	5
chr1.40995901.40996200	5
chr1.41120101.41120400	2
chr1.41305501.41305800	1
chr1.41481601.41481900	2
chr1.41825701.41826000	13
chr1.41887801.41888100	2
chr1.41982601.41982900	1
chr1.42164701.42165000	1
chr1.4221901.4222200	7
chr1.42249001.42249300	2
chr1.42272701.42273000	3
chr1.42611701.42612000	1
chr1.43126201.43126500	16
chr1.43203601.43203900	4
chr1.43204201.43204500	1
chr1.43250401.43250700	1
chr1.43352701.43353000	20
chr1.43353901.43354200	1
chr1.43405801.43406100	1
chr1.43422601.43422900	1
chr1.43426801.43427100	20
chr1.43473301.43473600	1
chr1.43736401.43736700	23
chr1.44031301.44031600	46
chr1.44058301.44058600	2
chr1.44069101.44069400	8
chr1.44069701.44070000	6
chr1.44070001.44070300	33
chr1.44070301.44070600	1
chr1.44411101.44411400	13
chr1.44437501.44437800	1
chr1.44442601.44442900	5
chr1.44446501.44446800	1
chr1.44569801.44570100	106
chr1.44823001.44823300	3
chr1.44869501.44869800	7
chr1.448801.449100	1
chr1.449101.449400	38
chr1.449401.449700	1
chr1.44973301.44973600	1
chr1.450301.450600	11
chr1.450601.450900	4
chr1.45099301.45099600	41
chr1.45189601.45189900	5
chr1.45189901.45190200	3
chr1.452101.452400	2
chr1.45238801.45239100	1
chr1.45247801.45248100	5
chr1.45248701.45249000	1
chr1.45287101.45287400	3
chr1.45309001.45309300	1
chr1.45474001.45474300	3
chr1.45474601.45474900	1
chr1.46014901.46015200	1
chr1.46089601.46089900	12
chr1.46090501.46090800	1
chr1.46155001.46155300	9
chr1.46217401.46217700	7
chr1.46631101.46631400	20
chr1.46631701.46632000	1
chr1.46706101.46706400	2
chr1.46706401.46706700	1
chr1.46707901.46708200	1
chr1.46770601.46770900	2
chr1.46796401.46796700	2
chr1.46857901.46858200	19
chr1.46902601.46902900	8
chr1.46940401.46940700	12
chr1.4726801.4727100	8
chr1.47694301.47694600	177
chr1.47694601.47694900	285
chr1.4771501.4771800	4
chr1.4774201.4774500	8
chr1.47778601.47778900	3
chr1.47782201.47782500	49
chr1.47798701.47799000	1
chr1.47898901.47899200	38
chr1.47899201.47899500	44
chr1.48000601.48000900	2
chr1.48057901.48058200	9
chr1.48058801.48059100	17
chr1.48224401.48224700	3
chr1.4830601.4830900	1
chr1.4831801.4832100	1
chr1.4832101.4832400	2
chr1.4833601.4833900	1
chr1.48458101.48458400	2
chr1.48464101.48464400	1
chr1.5023501.5023800	25
chr1.51810001.51810300	1
chr1.52197301.52197600	1
chr1.52342501.52342800	3
chr1.52455601.52455900	1
chr1.52508101.52508400	1
chr1.53066101.53066400	1
chr1.53163601.53163900	1
chr1.53309401.53309700	1
chr1.53311201.53311500	6
chr1.53386501.53386800	68
chr1.53386801.53387100	21
chr1.53392501.53392800	1
chr1.53529301.53529600	1
chr1.53542801.53543100	41
chr1.53544601.53544900	2
chr1.53546401.53546700	1
chr1.53740201.53740500	3
chr1.53905801.53906100	2
chr1.53906401.53906700	1
chr1.54585301.54585600	5
chr1.54807901.54808200	1
chr1.54821401.54821700	22
chr1.54822001.54822300	9
chr1.54925201.54925500	1
chr1.54951901.54952200	1
chr1.54965701.54966000	7
chr1.55179901.55180200	1
chr1.55180501.55180800	1
chr1.55247701.55248000	2
chr1.55266301.55266600	7
chr1.55447201.55447500	5
chr1.55464301.55464600	4
chr1.55464601.55464900	8
chr1.55507801.55508100	5
chr1.55840501.55840800	1
chr1.56943901.56944200	1
chr1.57024601.57024900	6
chr1.5771101.5771400	8
chr1.5772601.5772900	1
chr1.5772901.5773200	1
chr1.58716001.58716300	21
chr1.58716301.58716600	36
chr1.59010601.59010900	1
chr1.59041801.59042100	3
chr1.59042101.59042400	3
chr1.59043001.59043300	31
chr1.5935201.5935500	1
chr1.5949001.5949300	1
chr1.59611501.59611800	1
chr1.60174901.60175200	1
chr1.6054901.6055200	4
chr1.61385701.61386000	1
chr1.61649701.61650000	22
chr1.6186001.6186300	3
chr1.6186901.6187200	4
chr1.6187801.6188100	90
chr1.6189001.6189300	1
chr1.6201601.6201900	3
chr1.6203101.6203400	1
chr1.62056801.62057100	1
chr1.6208801.6209100	148
chr1.6209401.6209700	3
chr1.62119801.62120100	1
chr1.62120101.62120400	2
chr1.6265501.6265800	2
chr1.62658301.62658600	9
chr1.62660101.62660400	2
chr1.62660401.62660700	6
chr1.6268501.6268800	1
chr1.6270001.6270300	10
chr1.62725801.62726100	27
chr1.62783701.62784000	1
chr1.62785801.62786100	12
chr1.6294901.6295200	3
chr1.6296101.6296400	1
chr1.6312901.6313200	1
chr1.6315301.6315600	44
chr1.6315601.6315900	6
chr1.6318001.6318300	1
chr1.6354001.6354300	2
chr1.6369901.6370200	10
chr1.6373801.6374100	1
chr1.63790201.63790500	2
chr1.6454801.6455100	3
chr1.6455101.6455400	1
chr1.6503101.6503400	1
chr1.6511801.6512100	1
chr1.6514501.6514800	3
chr1.6515401.6515700	1
chr1.6528001.6528300	9
chr1.6531601.6531900	13
chr1.6533401.6533700	8
chr1.65467201.65467500	12
chr1.6548701.6549000	9
chr1.6552001.6552300	1
chr1.6558001.6558300	2
chr1.65613901.65614200	3
chr1.6566401.6566700	2
chr1.65733001.65733300	1
chr1.6612601.6612900	1
chr1.66257701.66258000	104
chr1.66258001.66258300	2
chr1.6654001.6654300	1
chr1.6672301.6672600	9
chr1.66999601.66999900	30
chr1.67460701.67461000	6
chr1.68513101.68513400	1
chr1.70806601.70806900	1
chr1.7121401.7121700	5
chr1.7122001.7122300	10
chr1.71400001.71400300	16
chr1.7539001.7539300	21
chr1.75591001.75591300	6
chr1.76262401.76262700	1
chr1.7722601.7722900	2
chr1.7725001.7725300	1
chr1.7737901.7738200	3
chr1.7743001.7743300	1
chr1.78277201.78277500	1
chr1.7844401.7844700	69
chr1.78511201.78511500	3
chr1.78557101.78557400	1
chr1.787501.787800	1
chr1.7885201.7885500	2
chr1.789901.790200	32
chr1.79472401.79472700	3
chr1.7947601.7947900	12
chr1.8013001.8013300	1
chr1.801901.802200	4
chr1.802201.802500	1
chr1.8086501.8086800	8
chr1.8137201.8137500	1
chr1.8257801.8258100	8
chr1.8264401.8264700	1
chr1.8271301.8271600	2
chr1.8299801.8300100	1
chr1.8377801.8378100	25
chr1.837901.838200	1
chr1.839101.839400	5
chr1.8394301.8394600	1
chr1.8404201.8404500	7
chr1.8405101.8405400	2
chr1.8417101.8417400	1
chr1.8420101.8420400	12
chr1.8420401.8420700	2
chr1.8445901.8446200	6
chr1.852601.852900	2
chr1.853501.853800	1
chr1.853801.854100	1
chr1.855601.855900	16
chr1.857101.857400	1
chr1.86081701.86082000	212
chr1.86082001.86082300	60
chr1.86082901.86083200	2
chr1.861601.861900	3
chr1.86620801.86621100	22
chr1.867901.868200	1
chr1.86988901.86989200	14
chr1.86989201.86989500	1
chr1.87018001.87018300	11
chr1.871501.871800	1
chr1.87598501.87598800	3
chr1.87802501.87802800	1
chr1.884101.884400	2
chr1.885901.886200	2
chr1.89358901.89359200	1
chr1.8940901.8941200	1
chr1.89457301.89457600	1
chr1.89457901.89458200	1
chr1.897001.897300	1
chr1.89739901.89740200	5
chr1.89887501.89887800	1
chr1.899101.899400	1
chr1.899701.900000	5
chr1.90135901.90136200	4
chr1.903001.903300	9
chr1.90307501.90307800	1
chr1.903301.903600	1
chr1.905101.905400	15
chr1.9099301.9099600	17
chr1.9101401.9101700	5
chr1.91303801.91304100	1
chr1.9131101.9131400	3
chr1.91356901.91357200	1
chr1.913801.914100	1
chr1.9190801.9191100	1
chr1.92413201.92413500	4
chr1.92414401.92414700	15
chr1.92547001.92547300	7
chr1.92682901.92683200	1
chr1.92947201.92947500	10
chr1.92947501.92947800	2
chr1.9295801.9296100	1
chr1.93248101.93248400	6
chr1.93408601.93408900	6
chr1.93543601.93543900	5
chr1.9355501.9355800	1
chr1.941701.942000	2
chr1.9425701.9426000	1
chr1.9429301.9429600	58
chr1.94583701.94584000	3
chr1.94715101.94715400	10
chr1.948301.948600	30
chr1.953401.953700	3
chr1.95390101.95390400	1
chr1.95540101.95540400	2
chr1.957301.957600	15
chr1.961801.962100	11
chr1.963301.963600	4
chr1.964201.964500	2
chr1.9669001.9669300	3
chr1.9670801.9671100	4
chr1.9684901.9685200	19
chr1.9686701.9687000	1
chr1.971701.972000	1
chr1.97185301.97185600	3
chr1.9748501.9748800	1
chr1.9749701.9750000	99
chr1.9775801.9776100	3
chr1.978901.979200	15
chr1.979201.979500	1
chr1.980101.980400	7
chr1.981901.982200	3
chr1.98499601.98499900	1
chr1.988201.988500	8
chr1.990601.990900	1
chr1.99728401.99728700	3
chr10.100027501.100027800	4
chr10.100154101.100154400	3
chr10.101282101.101282400	1
chr10.101283901.101284200	2
chr10.101284201.101284500	2
chr10.101284501.101284800	4
chr10.101286901.101287200	152
chr10.101287201.101287500	28
chr10.101295601.101295900	9
chr10.101295901.101296200	2
chr10.101297701.101298000	29
chr10.101418301.101418600	116
chr10.101493001.101493300	3
chr10.101875801.101876100	3
chr10.1019401.1019700	4
chr10.101988001.101988300	2
chr10.102025201.102025500	1
chr10.1021201.1021500	1
chr10.1022701.1023000	2
chr10.102276901.102277200	6
chr10.102279301.102279600	2
chr10.102756001.102756300	9
chr10.102777901.102778200	3
chr10.102789901.102790200	4
chr10.103349101.103349400	3
chr10.103575001.103575300	2
chr10.103826701.103827000	1
chr10.104160001.104160300	12
chr10.104160301.104160600	2
chr10.104183701.104184000	1
chr10.104189701.104190000	1
chr10.104190001.104190300	2
chr10.104208901.104209200	2
chr10.104211601.104211900	1
chr10.104211901.104212200	1
chr10.104222701.104223000	9
chr10.104223001.104223300	40
chr10.104476501.104476800	1
chr10.104626801.104627100	1
chr10.104629801.104630100	8
chr10.104630701.104631000	3
chr10.104676601.104676900	2
chr10.104676901.104677200	1
chr10.104679001.104679300	36
chr10.104679301.104679600	86
chr10.105108601.105108900	2
chr10.105126001.105126300	1
chr10.105126301.105126600	1
chr10.105127201.105127500	2
chr10.105129001.105129300	1
chr10.105307501.105307800	7
chr10.105317101.105317400	1
chr10.105345001.105345300	2
chr10.105345601.105345900	1
chr10.105361801.105362100	11
chr10.105378901.105379200	2
chr10.105420901.105421200	2
chr10.105421201.105421500	4
chr10.105426601.105426900	3
chr10.105428401.105428700	104
chr10.105448201.105448500	53
chr10.106073701.106074000	3
chr10.10754101.10754400	1
chr10.1101601.1101900	1
chr10.11112301.11112600	46
chr10.112116301.112116600	1
chr10.112220101.112220400	49
chr10.112255201.112255500	1
chr10.112326301.112326600	13
chr10.112668901.112669200	2
chr10.112838701.112839000	3
chr10.114712801.114713100	21
chr10.114713101.114713400	9
chr10.114924901.114925200	1
chr10.114926701.114927000	2
chr10.114939001.114939300	1
chr10.115862101.115862400	5
chr10.116303401.116303700	5
chr10.117883201.117883500	2
chr10.118430101.118430400	3
chr10.118504201.118504500	2
chr10.118549801.118550100	23
chr10.118763401.118763700	1
chr10.118764901.118765200	25
chr10.118765201.118765500	19
chr10.118767001.118767300	8
chr10.118886401.118886700	12
chr10.118895701.118896000	3
chr10.118896001.118896300	107
chr10.118936201.118936500	21
chr10.11910901.11911200	1
chr10.119136301.119136600	1
chr10.119256301.119256600	2
chr10.119301601.119301900	1
chr10.11934601.11934900	2
chr10.119806801.119807100	3
chr10.1203301.1203600	7
chr10.120353401.120353700	16
chr10.120353701.120354000	3
chr10.120354301.120354600	118
chr10.120354601.120354900	5
chr10.120354901.120355200	127
chr10.120355201.120355500	9
chr10.1206601.1206900	7
chr10.120801901.120802200	1
chr10.120803101.120803400	1
chr10.12086401.12086700	8
chr10.121153501.121153800	23
chr10.121304401.121304700	2
chr10.121577701.121578000	1
chr10.121578901.121579200	1
chr10.121633501.121633800	1
chr10.1219501.1219800	1
chr10.122214601.122214900	3
chr10.122609101.122609400	1
chr10.122609401.122609700	2
chr10.122707201.122707500	3
chr10.12284101.12284400	2
chr10.1229701.1230000	1
chr10.123283501.123283800	2
chr10.123871801.123872100	2
chr10.123923701.123924000	1
chr10.124402501.124402800	7
chr10.124578001.124578300	1
chr10.124578601.124578900	1
chr10.124638901.124639200	1
chr10.12491101.12491400	1
chr10.125425501.125425800	6
chr10.125618701.125619000	1
chr10.125650201.125650500	1
chr10.125652001.125652300	1
chr10.125751901.125752200	1
chr10.125803501.125803800	1
chr10.125978101.125978400	1
chr10.126211801.126212100	4
chr10.126236101.126236400	7
chr10.126301501.126301800	42
chr10.126330601.126330900	12
chr10.126421501.126421800	45
chr10.126481201.126481500	1
chr10.126603001.126603300	23
chr10.126797101.126797400	1
chr10.126917101.126917400	1
chr10.127584301.127584600	1
chr10.127586101.127586400	1
chr10.127818601.127818900	1
chr10.127932301.127932600	1
chr10.128194501.128194800	15
chr10.128594401.128594700	29
chr10.128595001.128595300	9
chr10.128595901.128596200	2
chr10.1286101.1286400	12
chr10.128973301.128973600	28
chr10.128973901.128974200	13
chr10.128974201.128974500	2
chr10.128992801.128993100	2
chr10.128994901.128995200	4
chr10.128995201.128995500	41
chr10.129536401.129536700	4
chr10.129538501.129538800	2
chr10.129947401.129947700	1
chr10.130007701.130008000	17
chr10.13095901.13096200	1
chr10.131266501.131266800	1
chr10.131575501.131575800	2
chr10.131576401.131576700	12
chr10.131576701.131577000	2
chr10.131592601.131592900	3
chr10.131636701.131637000	1
chr10.131640301.131640600	1
chr10.131685001.131685300	10
chr10.131687401.131687700	21
chr10.131698801.131699100	1
chr10.131812201.131812500	1
chr10.131812501.131812800	1
chr10.131819401.131819700	4
chr10.131927101.131927400	2
chr10.131987401.131987700	3
chr10.131988001.131988300	10
chr10.131989801.131990100	2
chr10.132317701.132318000	1
chr10.132363901.132364200	1
chr10.132893101.132893400	1
chr10.132894601.132894900	4
chr10.133144201.133144500	46
chr10.133251601.133251900	13
chr10.133317901.133318200	4
chr10.133318201.133318500	1
chr10.13340101.13340400	1
chr10.133449001.133449300	1
chr10.133458001.133458300	2
chr10.133506601.133506900	3
chr10.133508101.133508400	1
chr10.133509001.133509300	3
chr10.133509901.133510200	10
chr10.133642501.133642800	1
chr10.133644001.133644300	4
chr10.133644301.133644600	2
chr10.133665901.133666200	44
chr10.133749301.133749600	5
chr10.133878601.133878900	1
chr10.133880701.133881000	4
chr10.133929601.133929900	2
chr10.133938301.133938600	1
chr10.133947001.133947300	1
chr10.133949701.133950000	1
chr10.133951501.133951800	21
chr10.134003401.134003700	2
chr10.134015101.134015400	8
chr10.134016601.134016900	2
chr10.134018401.134018700	11
chr10.134019001.134019300	73
chr10.134019601.134019900	1
chr10.134040001.134040300	29
chr10.134040301.134040600	1
chr10.134041501.134041800	5
chr10.134069701.134070000	7
chr10.134071801.134072100	3
chr10.134093701.134094000	3
chr10.134097001.134097300	19
chr10.134097301.134097600	114
chr10.134124001.134124300	7
chr10.134163901.134164200	1
chr10.134164201.134164500	5
chr10.134216401.134216700	3
chr10.134217001.134217300	1
chr10.134267401.134267700	2
chr10.134331001.134331300	2
chr10.134349601.134349900	5
chr10.134368501.134368800	2
chr10.134399701.134400000	3
chr10.134478301.134478600	11
chr10.134502601.134502900	2
chr10.134505601.134505900	18
chr10.134527501.134527800	3
chr10.134534101.134534400	98
chr10.134535601.134535900	2
chr10.134551801.134552100	1
chr10.134566201.134566500	1
chr10.134567401.134567700	1
chr10.134583601.134583900	17
chr10.134587801.134588100	1
chr10.134591401.134591700	3
chr10.134597101.134597400	5
chr10.134604301.134604600	3
chr10.134608801.134609100	1
chr10.134611501.134611800	1
chr10.134638801.134639100	1
chr10.134671501.134671800	3
chr10.134673601.134673900	2
chr10.134682301.134682600	2
chr10.134682601.134682900	6
chr10.134695201.134695500	2
chr10.134697001.134697300	1
chr10.134700901.134701200	1
chr10.134723401.134723700	88
chr10.134723701.134724000	10
chr10.134727601.134727900	14
chr10.134734501.134734800	1
chr10.134734801.134735100	2
chr10.134738101.134738400	1
chr10.134738701.134739000	5
chr10.134740801.134741100	1
chr10.134755201.134755500	3
chr10.134757901.134758200	1
chr10.134772301.134772600	1
chr10.134776501.134776800	51
chr10.134778901.134779200	6
chr10.134820601.134820900	1
chr10.134821801.134822100	1
chr10.134822401.134822700	10
chr10.134824501.134824800	2
chr10.134826301.134826600	1
chr10.134828101.134828400	18
chr10.134831401.134831700	1
chr10.134833801.134834100	3
chr10.134835901.134836200	1
chr10.134837101.134837400	1
chr10.134845201.134845500	1
chr10.134853001.134853300	1
chr10.134862601.134862900	10
chr10.134875501.134875800	2
chr10.134889901.134890200	15
chr10.134895301.134895600	59
chr10.134898001.134898300	4
chr10.134902501.134902800	1
chr10.134913901.134914200	1
chr10.134916901.134917200	4
chr10.134944501.134944800	1
chr10.134944801.134945100	2
chr10.134946001.134946300	1
chr10.134954701.134955000	2
chr10.134955001.134955300	2
chr10.134971501.134971800	2
chr10.134978101.134978400	10
chr10.134978401.134978700	15
chr10.134978701.134979000	2
chr10.134979301.134979600	1
chr10.134994601.134994900	5
chr10.134997301.134997600	1
chr10.134998801.134999100	6
chr10.135000301.135000600	33
chr10.135003901.135004200	1
chr10.135004201.135004500	1
chr10.135022201.135022500	1
chr10.135022801.135023100	1
chr10.135027001.135027300	5
chr10.135027601.135027900	103
chr10.135031801.135032100	4
chr10.135032101.135032400	16
chr10.135032701.135033000	1
chr10.135036301.135036600	1
chr10.135041101.135041400	1
chr10.135041401.135041700	2
chr10.135042901.135043200	3
chr10.135045001.135045300	141
chr10.135047701.135048000	10
chr10.135051001.135051300	24
chr10.135051301.135051600	15
chr10.135053101.135053400	1
chr10.135059101.135059400	10
chr10.135081301.135081600	22
chr10.135085801.135086100	6
chr10.135091201.135091500	12
chr10.135096301.135096600	8
chr10.135096901.135097200	2
chr10.135101101.135101400	3
chr10.135105001.135105300	1
chr10.135105301.135105600	2
chr10.135118801.135119100	2
chr10.135122701.135123000	3
chr10.135132901.135133200	1
chr10.135140101.135140400	6
chr10.135143701.135144000	87
chr10.135147001.135147300	1
chr10.135147601.135147900	1
chr10.135193201.135193500	18
chr10.135193801.135194100	11
chr10.135202801.135203100	3
chr10.135231901.135232200	1
chr10.135233401.135233700	1
chr10.135244201.135244500	2
chr10.135245701.135246000	1
chr10.135246601.135246900	1
chr10.135255001.135255300	8
chr10.135255301.135255600	2
chr10.135258601.135258900	3
chr10.135258901.135259200	1
chr10.135259501.135259800	9
chr10.135270001.135270300	1
chr10.135270301.135270600	6
chr10.135273301.135273600	1
chr10.135278101.135278400	4
chr10.135278701.135279000	1
chr10.135279001.135279300	3
chr10.135280501.135280800	10
chr10.135341101.135341400	2
chr10.135341401.135341700	19
chr10.135378301.135378600	20
chr10.135378901.135379200	1
chr10.135382201.135382500	1
chr10.135383101.135383400	2
chr10.135436501.135436800	160
chr10.135478201.135478500	1
chr10.135480901.135481200	1
chr10.135481201.135481500	1
chr10.135485701.135486000	1
chr10.135487801.135488100	8
chr10.135492301.135492600	2
chr10.135495601.135495900	1
chr10.1367401.1367700	4
chr10.13692601.13692900	1
chr10.1369801.1370100	1
chr10.13807501.13807800	24
chr10.1381501.1381800	1
chr10.13924801.13925100	3
chr10.1405201.1405500	2
chr10.14268901.14269200	1
chr10.1441201.1441500	19
chr10.1505401.1505700	110
chr10.1505701.1506000	21
chr10.1506901.1507200	2
chr10.1507501.1507800	11
chr10.1508401.1508700	5
chr10.1508701.1509000	35
chr10.15129001.15129300	1
chr10.15190801.15191100	67
chr10.15191101.15191400	1
chr10.15763201.15763500	3
chr10.1583701.1584000	8
chr10.1596601.1596900	19
chr10.16561801.16562100	141
chr10.1740901.1741200	1
chr10.17685001.17685300	2
chr10.18239401.18239700	1
chr10.18579601.18579900	2
chr10.21459901.21460200	7
chr10.21460501.21460800	3
chr10.21796201.21796500	1
chr10.21796501.21796800	1
chr10.21797101.21797400	12
chr10.21797401.21797700	1
chr10.21799501.21799800	9
chr10.22623001.22623300	10
chr10.22623301.22623600	26
chr10.22623601.22623900	86
chr10.22765801.22766100	1
chr10.22766101.22766400	64
chr10.23982301.23982600	7
chr10.24993301.24993600	6
chr10.25010701.25011000	113
chr10.25464901.25465200	1
chr10.2565001.2565300	1
chr10.25867801.25868100	19
chr10.26529901.26530200	1
chr10.26680501.26680800	35
chr10.26926501.26926800	1
chr10.27387901.27388200	4
chr10.27444901.27445200	1
chr10.27445201.27445500	49
chr10.27610801.27611100	3
chr10.28030201.28030500	2
chr10.2814301.2814600	1
chr10.28622401.28622700	1
chr10.28824301.28824600	102
chr10.28959301.28959600	2
chr10.29213701.29214000	23
chr10.29280301.29280600	2
chr10.2949601.2949900	4
chr10.29717401.29717700	2
chr10.29919601.29919900	12
chr10.30337801.30338100	9
chr10.30471301.30471600	4
chr10.30636601.30636900	2
chr10.30862501.30862800	19
chr10.31044601.31044900	1
chr10.3145501.3145800	1
chr10.3161101.3161400	4
chr10.3161401.3161700	2
chr10.32038201.32038500	4
chr10.3216001.3216300	2
chr10.32637301.32637600	1
chr10.33415801.33416100	1
chr10.3360901.3361200	7
chr10.3361201.3361500	6
chr10.3361501.3361800	95
chr10.3362401.3362700	3
chr10.35378101.35378400	1
chr10.35378401.35378700	1
chr10.35416801.35417100	4
chr10.35421001.35421300	4
chr10.35623501.35623800	1
chr10.3568201.3568500	5
chr10.3598801.3599100	1
chr10.37413001.37413300	9
chr10.37415701.37416000	1
chr10.37968601.37968900	3
chr10.38382301.38382600	1
chr10.3850201.3850500	54
chr10.3850501.3850800	31
chr10.38647501.38647800	3
chr10.387301.387600	2
chr10.38740201.38740500	4
chr10.38893201.38893500	1
chr10.3893101.3893400	12
chr10.3899401.3899700	1
chr10.3902401.3902700	1
chr10.395401.395700	2
chr10.397201.397500	1
chr10.398401.398700	3
chr10.399001.399300	7
chr10.4003501.4003800	3
chr10.409801.410100	1
chr10.412501.412800	2
chr10.413401.413700	5
chr10.415201.415500	1
chr10.416101.416400	1
chr10.422701.423000	2
chr10.42606001.42606300	1
chr10.42606301.42606600	2
chr10.42644701.42645000	2
chr10.42645301.42645600	1
chr10.42645601.42645900	28
[truncated: 15,173 more rows]

## Sheet: 10_6_BRCA
DMR	N_of_occurrence
chr1.10004101.10004400	1
chr1.100170001.100170300	4
chr1.1002001.1002300	92
chr1.1003501.1003800	2
chr1.1006801.1007100	25
chr1.100815601.100815900	3
chr1.100827301.100827600	3
chr1.10091401.10091700	3
chr1.10091701.10092000	72
chr1.1011001.1011300	2
chr1.1011301.1011600	65
chr1.1011601.1011900	2
chr1.1012501.1012800	5
chr1.1012801.1013100	3
chr1.1013401.1013700	20
chr1.1013701.1014000	22
chr1.1014001.1014300	1
chr1.1016101.1016400	4
chr1.1020001.1020300	1
chr1.10268401.10268700	2
chr1.10271701.10272000	1
chr1.1029601.1029900	1
chr1.10387501.10387800	3
chr1.1046701.1047000	6
chr1.1047601.1047900	3
chr1.1047901.1048200	4
chr1.1048801.1049100	1
chr1.10491601.10491900	9
chr1.1053001.1053300	1
chr1.10534801.10535100	1
chr1.10536901.10537200	1
chr1.106338301.106338600	1
chr1.1063801.1064100	6
chr1.10697401.10697700	1
chr1.10699201.10699500	1
chr1.10702801.10703100	2
chr1.1070401.1070700	3
chr1.10704301.10704600	5
chr1.10707001.10707300	7
chr1.10707601.10707900	4
chr1.10713301.10713600	1
chr1.10716001.10716300	1
chr1.10719001.10719300	1
chr1.10719901.10720200	6
chr1.10725001.10725300	1
chr1.10753201.10753500	12
chr1.10758601.10758900	1
chr1.10765501.10765800	1
chr1.10766701.10767000	1
chr1.10813501.10813800	2
chr1.10816201.10816500	36
chr1.108509101.108509400	1
chr1.108595501.108595800	4
chr1.108816301.108816600	3
chr1.10898101.10898400	3
chr1.1091401.1091700	1
chr1.109422001.109422300	1
chr1.1095301.1095600	3
chr1.1095901.1096200	1
chr1.109616401.109616700	3
chr1.109631101.109631400	1
chr1.109632601.109632900	1
chr1.109643701.109644000	4
chr1.109645201.109645500	28
chr1.109793101.109793400	2
chr1.109794301.109794600	4
chr1.109967101.109967400	1
chr1.10997701.10998000	17
chr1.110051401.110051700	1
chr1.1100701.1101000	2
chr1.110187001.110187300	1
chr1.110187301.110187600	21
chr1.110197801.110198100	2
chr1.110198101.110198400	1
chr1.110199301.110199600	1
chr1.110212501.110212800	1
chr1.1102201.1102500	2
chr1.11040001.11040300	27
chr1.110578501.110578800	15
chr1.110610001.110610300	13
chr1.110610301.110610600	83
chr1.1107301.1107600	2
chr1.110757601.110757900	1
chr1.1107601.1107900	4
chr1.110766301.110766600	2
chr1.110895601.110895900	12
chr1.110949001.110949300	16
chr1.1109701.1110000	41
chr1.1110901.1111200	38
chr1.111150901.111151200	1
chr1.11118301.11118600	2
chr1.11118901.11119200	14
chr1.11121001.11121300	4
chr1.111216001.111216300	3
chr1.111321901.111322200	3
chr1.111508201.111508500	1
chr1.1115101.1115400	12
chr1.11157601.11157900	5
chr1.111815701.111816000	5
chr1.112161601.112161900	38
chr1.112525501.112525800	6
chr1.113007301.113007600	23
chr1.1131601.1131900	3
chr1.11320801.11321100	9
chr1.11324101.11324400	2
chr1.113284801.113285100	11
chr1.113286001.113286300	53
chr1.113286301.113286600	1
chr1.11334301.11334600	1
chr1.113393401.113393700	1
chr1.113393701.113394000	8
chr1.113394301.113394600	2
chr1.113499301.113499600	5
chr1.113500801.113501100	2
chr1.113613301.113613600	44
chr1.113613601.113613900	2
chr1.113613901.113614200	1
chr1.113675401.113675700	21
chr1.1140601.1140900	2
chr1.1143301.1143600	3
chr1.114355501.114355800	15
chr1.114448501.114448800	7
chr1.114469801.114470100	5
chr1.1144801.1145100	18
chr1.1150201.1150500	1
chr1.115046701.115047000	1
chr1.1151101.1151400	8
chr1.1151401.1151700	36
chr1.1152301.1152600	1
chr1.1152901.1153200	2
chr1.115321501.115321800	1
chr1.1153501.1153800	1
chr1.115399501.115399800	4
chr1.1154101.1154400	1
chr1.11559901.11560200	3
chr1.11588401.11588700	7
chr1.1158901.1159200	1
chr1.11591401.11591700	15
chr1.11592001.11592300	3
chr1.11595001.11595300	11
chr1.11595301.11595600	3
chr1.11598301.11598600	10
chr1.1161001.1161300	6
chr1.1161601.1161900	11
chr1.1162201.1162500	1
chr1.116371501.116371800	20
chr1.116371801.116372100	5
chr1.116710201.116710500	7
chr1.1169401.1169700	15
chr1.116961601.116961900	2
chr1.116961901.116962200	4
chr1.116962801.116963100	1
chr1.1170001.1170300	1
chr1.117018001.117018300	5
chr1.117075601.117075900	79
chr1.117078001.117078300	19
chr1.1170901.1171200	4
chr1.11713201.11713500	1
chr1.1171801.1172100	3
chr1.11725201.11725500	10
chr1.117285301.117285600	1
chr1.1173001.1173300	12
chr1.1173301.1173600	10
chr1.1174201.1174500	5
chr1.117450601.117450900	7
chr1.1174801.1175100	2
chr1.117486901.117487200	2
chr1.117525901.117526200	1
chr1.1176901.1177200	2
chr1.11778001.11778300	1
chr1.11794801.11795100	24
chr1.118146901.118147200	1
chr1.118147501.118147800	3
chr1.1183801.1184100	29
chr1.1186201.1186500	1
chr1.1189501.1189800	7
chr1.11898901.11899200	7
chr1.11899501.11899800	3
chr1.11899801.11900100	1
chr1.1191001.1191300	5
chr1.11921101.11921400	1
chr1.119523301.119523600	9
chr1.119526301.119526600	117
chr1.119529901.119530200	2
chr1.11983801.11984100	3
chr1.11985301.11985600	1
chr1.11993401.11993700	2
chr1.1200901.1201200	1
chr1.120165001.120165300	3
chr1.120166501.120166800	2
chr1.120255901.120256200	1
chr1.1203001.1203300	2
chr1.120380401.120380700	3
chr1.12038401.12038700	1
chr1.1203901.1204200	1
chr1.120396001.120396300	2
chr1.120439501.120439800	1
chr1.1207201.1207500	4
chr1.12080701.12081000	1
chr1.12081001.12081300	40
chr1.12150601.12150900	1
chr1.12228901.12229200	2
chr1.12239101.12239400	28
chr1.12251101.12251400	1
chr1.12251401.12251700	4
chr1.12251701.12252000	4
chr1.12252601.12252900	1
chr1.1228201.1228500	10
chr1.12291901.12292200	7
chr1.1230901.1231200	10
chr1.1247701.1248000	1
chr1.1248001.1248300	3
chr1.1248301.1248600	2
chr1.1250101.1250400	2
chr1.1252201.1252500	11
chr1.1254901.1255200	1
chr1.1257601.1257900	1
chr1.12579001.12579300	5
chr1.12600301.12600600	1
chr1.12609601.12609900	1
chr1.1262401.1262700	19
chr1.1269001.1269300	45
chr1.1270501.1270800	1
chr1.1287301.1287600	16
chr1.1287601.1287900	4
chr1.1295401.1295700	5
chr1.1296001.1296300	1
chr1.1308301.1308600	1
chr1.1320601.1320900	1
chr1.1320901.1321200	6
chr1.1321501.1321800	1
chr1.1323601.1323900	2
chr1.1324201.1324500	1
chr1.132901.133200	10
chr1.1332001.1332300	1
chr1.1332301.1332600	1
chr1.1339801.1340100	1
chr1.1341301.1341600	2
chr1.135301.135600	4
chr1.1372801.1373100	1
chr1.1376101.1376400	1
chr1.13842601.13842900	2
chr1.1387501.1387800	1
chr1.1387801.1388100	1
chr1.13881001.13881300	4
chr1.1389301.1389600	1
chr1.1389601.1389900	3
chr1.1391401.1391700	2
chr1.1395901.1396200	5
chr1.1408201.1408500	7
chr1.1413301.1413600	1
chr1.1414801.1415100	1
chr1.142536001.142536300	4
chr1.142539301.142539600	51
chr1.142890301.142890600	1
chr1.142892401.142892700	3
chr1.143270401.143270700	1
chr1.143469301.143469600	1
chr1.143663701.143664000	3
chr1.143664001.143664300	19
chr1.143664601.143664900	2
chr1.143666101.143666400	4
chr1.1444201.1444500	3
chr1.144591601.144591900	2
chr1.1448101.1448400	3
chr1.1449901.1450200	6
chr1.1450201.1450500	29
chr1.145075801.145076100	1
chr1.145076401.145076700	37
chr1.145092601.145092900	2
chr1.1452301.1452600	7
chr1.145380601.145380900	1
chr1.145381501.145381800	4
chr1.145383001.145383300	11
chr1.145383601.145383900	1
chr1.145469101.145469400	18
chr1.145508701.145509000	1
chr1.145574401.145574700	6
chr1.145590301.145590600	1
chr1.145609501.145609800	3
chr1.145611601.145611900	16
chr1.145827301.145827600	8
chr1.145945501.145945800	1
chr1.145962301.145962600	3
chr1.1459801.1460100	4
chr1.146076601.146076900	1
chr1.146091601.146091900	3
chr1.1462801.1463100	6
chr1.1463101.1463400	3
chr1.146367601.146367900	16
chr1.146521801.146522100	5
chr1.146522401.146522700	1
chr1.146544001.146544300	1
chr1.146544301.146544600	28
chr1.146544901.146545200	7
chr1.146549401.146549700	1
chr1.146642401.146642700	2
chr1.1469401.1469700	1
chr1.147143401.147143700	2
chr1.147486001.147486300	2
chr1.147486301.147486600	12
chr1.147504601.147504900	1
chr1.147506101.147506400	2
chr1.147531001.147531300	2
chr1.1476001.1476300	1
chr1.147632701.147633000	1
chr1.1476901.1477200	1
chr1.147717001.147717300	2
chr1.147717301.147717600	1
chr1.147717901.147718200	1
chr1.147718201.147718500	2
chr1.147718801.147719100	9
chr1.1477201.1477500	7
chr1.147737401.147737700	3
chr1.147775801.147776100	23
chr1.147776101.147776400	60
chr1.147782101.147782400	1
chr1.147827101.147827400	2
chr1.147835201.147835500	1
chr1.147992101.147992400	1
chr1.148002301.148002600	39
chr1.148246801.148247100	1
chr1.148249201.148249500	2
chr1.148554901.148555200	3
chr1.148603201.148603500	1
chr1.148607401.148607700	22
chr1.148761901.148762200	15
chr1.148764601.148764900	19
chr1.148851901.148852200	19
chr1.148864501.148864800	5
chr1.1489201.1489500	1
chr1.1489501.1489800	1
chr1.149029201.149029500	73
chr1.1490701.1491000	1
chr1.1491001.1491300	1
chr1.149136901.149137200	1
chr1.149222701.149223000	18
chr1.149261101.149261400	3
chr1.149286301.149286600	1
chr1.149289001.149289300	1
chr1.149333701.149334000	25
chr1.149334001.149334300	1
chr1.149378101.149378400	2
chr1.149398501.149398800	1
chr1.149604001.149604300	1
chr1.149604601.149604900	4
chr1.1496401.1496700	12
chr1.149646301.149646600	1
chr1.149672701.149673000	26
chr1.149673301.149673600	2
chr1.149718901.149719200	27
chr1.149719501.149719800	1
chr1.149784601.149784900	5
chr1.1498501.1498800	5
chr1.149873401.149873700	3
chr1.1498801.1499100	11
chr1.149898001.149898300	1
chr1.149910901.149911200	27
chr1.149984101.149984400	1
chr1.150154501.150154800	60
chr1.150184501.150184800	1
chr1.150184801.150185100	1
chr1.150185101.150185400	4
chr1.150209401.150209700	4
chr1.150255901.150256200	3
chr1.150266701.150267000	1
chr1.150267601.150267900	1
chr1.150267901.150268200	10
chr1.150292801.150293100	2
chr1.150293701.150294000	20
chr1.150295201.150295500	2
chr1.150486001.150486300	6
chr1.150486601.150486900	3
chr1.150487201.150487500	15
chr1.150510301.150510600	1
chr1.150519301.150519600	1
chr1.150529201.150529500	18
chr1.150531001.150531300	43
chr1.1507501.1507800	1
chr1.1507801.1508100	26
chr1.1508401.1508700	7
chr1.150849301.150849600	2
chr1.150851101.150851400	2
chr1.150897301.150897600	1
chr1.151044001.151044300	1
chr1.151168501.151168800	2
chr1.15126001.15126300	1
chr1.15127801.15128100	3
chr1.15128401.15128700	6
chr1.151317601.151317900	2
chr1.151370701.151371000	1
chr1.151443901.151444200	1
chr1.151583101.151583400	1
chr1.151587001.151587300	1
chr1.151737901.151738200	5
chr1.151765201.151765500	4
chr1.152186101.152186400	1
chr1.152188801.152189100	1
chr1.15249001.15249300	2
chr1.15253501.15253800	2
chr1.152733001.152733300	1
chr1.152733901.152734200	2
chr1.15335701.15336000	17
chr1.1533901.1534200	1
chr1.1534201.1534500	10
chr1.153604501.153604800	7
chr1.153633001.153633300	2
chr1.153641101.153641400	1
chr1.153660301.153660600	1
chr1.153660601.153660900	6
chr1.153663001.153663300	11
chr1.15373501.15373800	3
chr1.15373801.15374100	3
chr1.153745501.153745800	1
chr1.153754201.153754500	3
chr1.153754501.153754800	1
chr1.153762301.153762600	25
chr1.15377401.15377700	3
chr1.153897601.153897900	4
chr1.153916501.153916800	1
chr1.153938101.153938400	5
chr1.153951901.153952200	5
chr1.153961501.153961800	2
chr1.154157701.154158000	1
chr1.154166101.154166400	3
chr1.154244101.154244400	1
chr1.154246801.154247100	5
chr1.154405201.154405500	3
chr1.154533001.154533300	2
chr1.154584001.154584300	1
chr1.154720501.154720800	10
chr1.154744801.154745100	1
chr1.154761001.154761300	2
chr1.154785901.154786200	1
chr1.1548601.1548900	1
chr1.154932601.154932900	1
chr1.154998001.154998300	2
chr1.155035501.155035800	92
chr1.155038501.155038800	1
chr1.155042401.155042700	3
chr1.155064901.155065200	1
chr1.155097301.155097600	1
chr1.155098201.155098500	37
chr1.155106301.155106600	12
chr1.155143501.155143800	2
chr1.155148301.155148600	5
chr1.155161801.155162100	1
chr1.155218501.155218800	7
chr1.155219701.155220000	2
chr1.1552201.1552500	5
chr1.155222701.155223000	1
chr1.155223001.155223300	1
chr1.155226001.155226300	6
chr1.155226301.155226600	1
chr1.155238301.155238600	6
chr1.155241301.155241600	2
chr1.155243701.155244000	2
chr1.155248801.155249100	18
chr1.155264401.155264700	10
chr1.1552801.1553100	3
chr1.155290801.155291100	1
chr1.155295001.155295300	1
chr1.15540001.15540300	1
chr1.15540301.15540600	12
chr1.15541801.15542100	1
chr1.155655901.155656200	5
chr1.155659501.155659800	1
chr1.15573301.15573600	2
chr1.1557601.1557900	2
chr1.15585901.15586200	1
chr1.155991301.155991600	11
chr1.156021001.156021300	2
chr1.156027001.156027300	7
chr1.156074101.156074400	1
chr1.156095101.156095400	1
chr1.156104701.156105000	1
chr1.156163201.156163500	1
chr1.156186601.156186900	6
chr1.156213601.156213900	2
chr1.156217801.156218100	3
chr1.156258901.156259200	7
chr1.156261001.156261300	46
chr1.156261301.156261600	4
chr1.156306601.156306900	1
chr1.156308701.156309000	86
chr1.156310201.156310500	1
chr1.156337501.156337800	8
chr1.156358201.156358500	3
chr1.156388201.156388500	1
chr1.156427501.156427800	1
chr1.156429301.156429600	1
chr1.156471601.156471900	37
chr1.156475201.156475500	24
chr1.156542701.156543000	2
chr1.156612601.156612900	20
chr1.156628501.156628800	1
chr1.15664201.15664500	10
chr1.156645001.156645300	1
chr1.156735301.156735600	3
chr1.156739201.156739500	1
chr1.156739501.156739800	1
chr1.1567801.1568100	1
chr1.156783901.156784200	1
chr1.156814501.156814800	1
chr1.156816301.156816600	19
chr1.1568701.1569000	5
chr1.156877801.156878100	4
chr1.156878101.156878400	1
chr1.156889801.156890100	1
chr1.1569301.1569600	10
chr1.1569601.1569900	1
chr1.156966301.156966600	1
chr1.157014301.157014600	1
chr1.15739201.15739500	1
chr1.157948801.157949100	1
chr1.157949101.157949400	1
chr1.157966801.157967100	42
chr1.158082001.158082300	1
chr1.158118901.158119200	1
chr1.1581901.1582200	1
chr1.15827701.15828000	2
chr1.15909301.15909600	4
chr1.15913501.15913800	13
chr1.15931801.15932100	6
chr1.15942601.15942900	5
chr1.15945901.15946200	2
chr1.15946201.15946500	28
chr1.159792901.159793200	1
chr1.159825601.159825900	1
chr1.160054501.160054800	34
chr1.16009201.16009500	1
chr1.16009501.16009800	8
chr1.160340101.160340400	2
chr1.160341001.160341300	8
chr1.160371001.160371300	1
chr1.160377901.160378200	4
chr1.160389001.160389300	8
chr1.160389301.160389600	21
chr1.16054201.16054500	1
chr1.160615201.160615500	1
chr1.1606801.1607100	7
chr1.16070401.16070700	10
chr1.16073401.16073700	2
chr1.16073701.16074000	3
chr1.160771801.160772100	9
chr1.1608901.1609200	1
chr1.160992901.160993200	1
chr1.161007901.161008200	1
chr1.161049001.161049300	1
chr1.161085901.161086200	3
chr1.161103901.161104200	2
chr1.161148901.161149200	4
chr1.161227501.161227800	9
chr1.161358901.161359200	36
chr1.161361301.161361600	4
chr1.161417701.161418000	30
chr1.161424301.161424600	1
chr1.161424601.161424900	2
chr1.161424901.161425200	1
chr1.161425501.161425800	19
chr1.161425801.161426100	15
chr1.161431501.161431800	2
chr1.161432101.161432400	2
chr1.161433001.161433300	7
chr1.161439601.161439900	9
chr1.161439901.161440200	2
chr1.161440801.161441100	37
chr1.161441101.161441400	9
chr1.161442601.161442900	4
chr1.161494801.161495100	1
chr1.161501701.161502000	3
chr1.161502001.161502300	5
chr1.161574301.161574600	3
chr1.161574901.161575200	22
chr1.161576101.161576400	3
chr1.161583001.161583300	4
chr1.16164901.16165200	2
chr1.161720101.161720400	3
chr1.16173001.16173300	3
chr1.161973301.161973600	16
chr1.161992201.161992500	5
chr1.161994901.161995200	1
chr1.1622101.1622400	1
chr1.162334801.162335100	1
chr1.162336901.162337200	1
chr1.162339001.162339300	85
chr1.162339301.162339600	1
chr1.162370501.162370800	30
chr1.162533401.162533700	46
chr1.1626601.1626900	1
chr1.16270201.16270500	1
chr1.16270501.16270800	31
chr1.16278001.16278300	1
chr1.16304401.16304700	1
chr1.1632601.1632900	1
chr1.1643101.1643400	50
chr1.1643401.1643700	1
chr1.164545201.164545500	1
chr1.164545801.164546100	4
chr1.1645801.1646100	22
chr1.16462801.16463100	2
chr1.16463401.16463700	2
chr1.16474501.16474800	1
chr1.16475401.16475700	1
chr1.16475701.16476000	3
chr1.16479301.16479600	4
chr1.16482901.16483200	3
chr1.165084901.165085200	2
chr1.165085501.165085800	10
chr1.16531501.16531800	1
chr1.16532101.16532400	3
chr1.16532401.16532700	1
chr1.16534801.16535100	2
chr1.16541701.16542000	3
chr1.16553701.16554000	11
chr1.16554001.16554300	3
chr1.16554601.16554900	2
chr1.165597601.165597900	1
chr1.1657201.1657500	6
chr1.1657501.1657800	9
chr1.1657801.1658100	1
chr1.1658101.1658400	8
chr1.16668901.16669200	8
chr1.16676401.16676700	1
chr1.166847401.166847700	1
chr1.166847701.166848000	7
chr1.166851901.166852200	1
chr1.166890601.166890900	3
chr1.166891801.166892100	18
chr1.16695601.16695900	1
chr1.166957201.166957500	5
chr1.167091601.167091900	1
chr1.1672201.1672500	8
chr1.1672501.1672800	7
chr1.167409001.167409300	1
chr1.167434501.167434800	1
chr1.167442601.167442900	36
chr1.167453701.167454000	4
chr1.167454001.167454300	1
chr1.167458801.167459100	29
chr1.167478601.167478900	13
chr1.167486701.167487000	1
chr1.16768501.16768800	1
chr1.167689801.167690100	2
chr1.1678801.1679100	1
chr1.168146101.168146400	5
chr1.168193801.168194100	2
chr1.16827001.16827300	2
chr1.16839301.16839600	6
chr1.1684501.1684800	2
chr1.16847101.16847400	14
chr1.16849501.16849800	4
chr1.16849801.16850100	19
chr1.16858801.16859100	2
chr1.16860001.16860300	2
chr1.16861501.16861800	12
chr1.16861801.16862100	1
chr1.1686301.1686600	6
chr1.16874101.16874400	6
chr1.1692301.1692600	1
chr1.1692601.1692900	7
chr1.16937701.16938000	9
chr1.16938901.16939200	1
chr1.169396501.169396800	2
chr1.16974001.16974300	24
chr1.16974301.16974600	32
chr1.16974601.16974900	1
chr1.16976401.16976700	1
chr1.16983601.16983900	3
chr1.17006401.17006700	42
chr1.17007001.17007300	78
chr1.17007901.17008200	3
chr1.17016601.17016900	6
chr1.17017801.17018100	21
chr1.17019001.17019300	13
chr1.17021401.17021700	1
chr1.17033701.17034000	6
chr1.17034901.17035200	2
chr1.170634901.170635200	66
chr1.17074501.17074800	1
chr1.17077501.17077800	2
chr1.17083501.17083800	10
chr1.17083801.17084100	2
chr1.17085301.17085600	4
chr1.17086501.17086800	5
chr1.171639901.171640200	8
chr1.171753301.171753600	8
chr1.17200201.17200500	2
chr1.17239501.17239800	2
chr1.172722001.172722300	1
chr1.17280601.17280900	1
chr1.17281201.17281500	2
chr1.17285701.17286000	3
chr1.172902901.172903200	5
chr1.17292301.17292600	1
chr1.17329801.17330100	1
chr1.17330401.17330700	1
chr1.173638201.173638500	2
chr1.173640601.173640900	28
chr1.173794501.173794800	4
chr1.17381101.17381400	31
chr1.17381401.17381700	7
chr1.17382301.17382600	42
chr1.174131101.174131400	9
chr1.17446801.17447100	2
chr1.17447401.17447700	17
chr1.17475901.17476200	1
chr1.17476201.17476500	4
chr1.175048201.175048500	22
chr1.17518801.17519100	1
chr1.175546801.175547100	1
chr1.175547101.175547400	10
chr1.17732401.17732700	1
chr1.17736601.17736900	12
chr1.17747701.17748000	3
chr1.17762101.17762400	2
chr1.178007701.178008000	18
chr1.178510201.178510500	1
chr1.178550401.178550700	1
chr1.17864101.17864400	1
chr1.178993801.178994100	6
chr1.178994401.178994700	1
chr1.178997401.178997700	10
chr1.179145001.179145300	17
chr1.179334301.179334600	1
chr1.179336101.179336400	1
chr1.179559601.179559900	13
chr1.179561701.179562000	44
chr1.179607001.179607300	34
chr1.179714101.179714400	20
chr1.179714401.179714700	1
chr1.179849701.179850000	1
chr1.180879301.180879600	1
chr1.180883801.180884100	1
chr1.181065601.181065900	1
chr1.18152701.18153000	1
chr1.182001001.182001300	28
chr1.1824901.1825200	1
chr1.182760301.182760600	13
chr1.182921101.182921400	4
chr1.182990101.182990400	19
chr1.183389101.183389400	6
chr1.183549601.183549900	3
chr1.1841401.1841700	11
chr1.1842001.1842300	3
chr1.184725601.184725900	6
chr1.1848001.1848300	5
chr1.1849201.1849500	3
chr1.184924801.184925100	10
chr1.184940401.184940700	1
chr1.1849501.1849800	1
chr1.185016901.185017200	1
chr1.1851901.1852200	3
chr1.1852501.1852800	3
chr1.185344501.185344800	4
chr1.1857901.1858200	1
chr1.1858501.1858800	1
chr1.186624001.186624300	2
chr1.18702901.18703200	1
chr1.1872901.1873200	3
chr1.1874101.1874400	2
chr1.1874401.1874700	3
chr1.1887601.1887900	5
chr1.1887901.1888200	26
chr1.1888501.1888800	6
chr1.1888801.1889100	4
chr1.1895101.1895400	1
chr1.18954601.18954900	5
chr1.18954901.18955200	2
chr1.18961801.18962100	3
chr1.1896301.1896600	6
chr1.1909801.1910100	10
chr1.1913701.1914000	12
chr1.1914301.1914600	1
chr1.1915501.1915800	1
chr1.19182301.19182600	28
chr1.19204201.19204500	3
chr1.19209001.19209300	1
chr1.19211701.19212000	3
chr1.192446101.192446400	2
chr1.192469501.192469800	36
chr1.192778801.192779100	5
chr1.19280101.19280400	3
chr1.19280401.19280700	3
chr1.19284301.19284600	1
chr1.19285201.19285500	1
chr1.193027201.193027500	10
chr1.1952701.1953000	3
chr1.1954801.1955100	9
chr1.19576501.19576800	3
chr1.19614301.19614600	1
chr1.19614901.19615200	1
chr1.1962001.1962300	1
chr1.1962901.1963200	1
chr1.196379701.196380000	1
chr1.19664101.19664400	7
chr1.19666501.19666800	33
chr1.1972801.1973100	2
chr1.1973101.1973400	11
chr1.1974301.1974600	3
chr1.197513701.197514000	66
chr1.197892301.197892600	15
chr1.1979401.1979700	1
chr1.198123601.198123900	1
chr1.198124501.198124800	13
chr1.19812901.19813200	1
chr1.19813801.19814100	6
chr1.1984801.1985100	7
chr1.1989301.1989600	46
chr1.1992301.1992600	1
chr1.19968301.19968600	3
chr1.19968901.19969200	8
chr1.19989901.19990200	1
chr1.200005201.200005500	4
chr1.20006401.20006700	3
chr1.200272201.200272500	11
chr1.2003701.2004000	5
chr1.200381101.200381400	1
chr1.2004001.2004300	9
chr1.2005801.2006100	5
chr1.200637001.200637300	1
chr1.2006401.2006700	2
chr1.2007001.2007300	44
chr1.200841601.200841900	4
chr1.200842501.200842800	16
chr1.200843101.200843400	59
chr1.200968801.200969100	4
chr1.200969101.200969400	216
chr1.200969401.200969700	4
chr1.200970001.200970300	34
chr1.200971201.200971500	1
chr1.201084001.201084300	5
chr1.201140701.201141000	8
chr1.201194701.201195000	1
chr1.201197101.201197400	5
chr1.201197401.201197700	7
chr1.20124001.20124300	2
chr1.201244501.201244800	2
chr1.201440401.201440700	1
chr1.201639901.201640200	1
chr1.201927001.201927300	25
chr1.202030201.202030500	2
chr1.202053901.202054200	7
chr1.20206801.20207100	2
chr1.202160701.202161000	2
chr1.202216801.202217100	7
chr1.202217701.202218000	1
chr1.2024401.2024700	2
chr1.202680601.202680900	1
chr1.2028001.2028300	2
chr1.202856401.202856700	2
chr1.202856701.202857000	29
chr1.203061601.203061900	3
chr1.203243701.203244000	1
chr1.203735401.203735700	6
chr1.2037901.2038200	2
chr1.2038201.2038500	2
chr1.203832601.203832900	4
chr1.203870101.203870400	1
chr1.204040201.204040500	2
chr1.2040901.2041200	2
chr1.204226201.204226500	1
chr1.204228301.204228600	11
chr1.204228601.204228900	28
chr1.2042401.2042700	12
chr1.2043301.2043600	3
chr1.204381901.204382200	17
chr1.2044201.2044500	1
chr1.2046001.2046300	3
chr1.204675601.204675900	1
chr1.2047501.2047800	2
chr1.204916201.204916500	4
chr1.204949501.204949800	17
chr1.204951301.204951600	2
chr1.204961801.204962100	16
chr1.204962101.204962400	31
chr1.205238701.205239000	1
chr1.205239001.205239300	1
chr1.205262701.205263000	2
chr1.205449601.205449900	6
chr1.205561801.205562100	1
chr1.205630801.205631100	2
chr1.205710001.205710300	9
chr1.205720201.205720500	1
chr1.205720801.205721100	1
chr1.205743001.205743300	4
chr1.205783801.205784100	10
chr1.205818901.205819200	5
chr1.206224201.206224500	1
chr1.2062801.2063100	1
chr1.206641501.206641800	1
chr1.206682901.206683200	17
chr1.206683201.206683500	4
chr1.2067301.2067600	1
chr1.206857501.206857800	13
chr1.206966401.206966700	36
chr1.207064201.207064500	10
chr1.207080701.207081000	1
chr1.207081001.207081300	1
chr1.207819001.207819300	1
chr1.2081701.2082000	5
chr1.208419601.208419900	10
chr1.2084401.2084700	47
chr1.209601001.209601300	18
chr1.20961901.20962200	3
chr1.209841601.209841900	1
chr1.20989201.20989500	8
chr1.20989501.20989800	65
chr1.209979001.209979300	1
chr1.210002101.210002400	1
chr1.21030601.21030900	16
chr1.21043201.21043500	1
chr1.21045301.21045600	1
chr1.210467401.210467700	1
chr1.21056101.21056400	24
chr1.21061201.21061500	1
chr1.21116101.21116400	1
chr1.211380301.211380600	2
chr1.211381501.211381800	1
chr1.211434901.211435200	99
chr1.211435201.211435500	59
chr1.211501501.211501800	6
chr1.211554901.211555200	6
chr1.211650601.211650900	82
chr1.211689301.211689600	1
chr1.211690801.211691100	5
chr1.211702801.211703100	6
chr1.2117101.2117400	15
chr1.2117701.2118000	1
chr1.211849501.211849800	39
chr1.2118901.2119200	1
chr1.2119201.2119500	3
chr1.2119501.2119800	9
chr1.2122801.2123100	3
chr1.2123401.2123700	8
chr1.212456101.212456400	99
chr1.212585401.212585700	2
chr1.212605201.212605500	1
chr1.212688001.212688300	2
chr1.212733001.212733300	1
chr1.212870401.212870700	5
chr1.212963701.212964000	12
chr1.212964001.212964300	1
chr1.212967301.212967600	1
chr1.213088201.213088500	11
chr1.213224101.213224400	1
chr1.213225901.213226200	1
chr1.213562201.213562500	3
chr1.213562801.213563100	2
chr1.2138701.2139000	1
chr1.213901501.213901800	19
chr1.2140201.2140500	2
chr1.2143801.2144100	24
chr1.214557901.214558200	4
chr1.214726201.214726500	2
chr1.214726501.214726800	16
chr1.214781401.214781700	2
chr1.215043601.215043900	2
chr1.215044801.215045100	5
chr1.21550801.21551100	1
chr1.2157301.2157600	1
chr1.2157901.2158200	2
chr1.2163001.2163300	10
chr1.21655501.21655800	25
chr1.21670501.21670800	1
chr1.217306201.217306500	14
chr1.21755101.21755400	2
chr1.21756301.21756600	2
chr1.21761101.21761400	1
chr1.21762901.21763200	4
chr1.21765601.21765900	20
chr1.21788401.21788700	2
chr1.218666101.218666400	1
chr1.21894901.21895200	2
chr1.21921301.21921600	1
chr1.21929701.21930000	1
chr1.21930601.21930900	61
chr1.21931201.21931500	5
chr1.21946501.21946800	3
chr1.21967801.21968100	2
chr1.21975901.21976200	1
chr1.21976801.21977100	3
chr1.219784201.219784500	1
chr1.219786301.219786600	21
chr1.21985501.21985800	16
chr1.21993001.21993300	4
chr1.220101001.220101300	1
chr1.220102801.220103100	1
chr1.220220401.220220700	1
chr1.220510501.220510800	1
chr1.220960801.220961100	1
chr1.22106401.22106700	1
chr1.22112101.22112400	1
chr1.22141501.22141800	1
chr1.22154401.22154700	43
chr1.22155001.22155300	1
chr1.22156201.22156500	1
chr1.22157401.22157700	2
chr1.22189201.22189500	12
chr1.22189501.22189800	2
chr1.22191001.22191300	1
chr1.22191301.22191600	9
chr1.22211701.22212000	1
chr1.222461701.222462000	4
chr1.222789901.222790200	1
chr1.222819601.222819900	20
chr1.2232301.2232600	5
chr1.223256401.223256700	3
chr1.223356601.223356900	2
chr1.223568101.223568400	32
chr1.223741201.223741500	24
chr1.22380601.22380900	3
chr1.223934401.223934700	2
chr1.224031001.224031300	4
chr1.224034601.224034900	2
chr1.2240401.2240700	1
chr1.2240701.2241000	32
chr1.224181001.224181300	16
chr1.224181901.224182200	11
chr1.224182201.224182500	4
chr1.224300101.224300400	6
chr1.224368801.224369100	2
chr1.224393101.224393400	1
chr1.22444801.22445100	1
chr1.22455901.22456200	5
chr1.22456201.22456500	19
chr1.2247901.2248200	11
chr1.224804101.224804400	7
chr1.224924701.224925000	16
chr1.2249401.2249700	2
chr1.2250301.2250600	1
chr1.225118501.225118800	1
chr1.2252101.2252400	11
chr1.2256601.2256900	2
chr1.225867301.225867600	1
chr1.2259001.2259300	22
chr1.226072501.226072800	1
chr1.226076101.226076400	5
chr1.226076701.226077000	1
chr1.226109701.226110000	10
chr1.226110301.226110600	4
chr1.226112401.226112700	2
chr1.226113301.226113600	1
chr1.226113601.226113900	2
chr1.226128901.226129200	1
chr1.226188601.226188900	2
chr1.226296301.226296600	2
chr1.226372501.226372800	7
chr1.226412101.226412400	5
chr1.2265901.2266200	33
chr1.2267101.2267400	2
chr1.2268001.2268300	1
chr1.226827301.226827600	5
chr1.226889101.226889400	10
chr1.226890001.226890300	4
chr1.22692001.22692300	9
chr1.22692301.22692600	2
chr1.227161801.227162100	1
chr1.227162401.227162700	1
chr1.227681701.227682000	4
chr1.227692201.227692500	2
chr1.227729101.227729400	45
chr1.227747101.227747400	2
chr1.227748301.227748600	1
chr1.2277601.2277900	3
chr1.22779601.22779900	3
chr1.227915701.227916000	2
chr1.227973601.227973900	16
chr1.227974201.227974500	12
chr1.227977801.227978100	3
chr1.228003901.228004200	1
chr1.228075301.228075600	42
chr1.228110701.228111000	2
chr1.228111901.228112200	1
chr1.228132601.228132900	2
chr1.228159601.228159900	8
chr1.228160801.228161100	1
chr1.228274201.228274500	7
chr1.228294601.228294900	6
chr1.228327301.228327600	1
chr1.228338101.228338400	1
chr1.228344401.228344700	7
chr1.228351601.228351900	4
chr1.228360301.228360600	1
chr1.228363601.228363900	2
chr1.228364201.228364500	7
chr1.228460501.228460800	4
chr1.228461701.228462000	25
chr1.228462001.228462300	7
chr1.228464401.228464700	1
chr1.228464701.228465000	12
chr1.228466501.228466800	21
chr1.228470401.228470700	2
chr1.228474901.228475200	2
chr1.228475201.228475500	3
chr1.228505201.228505500	19
chr1.228509701.228510000	3
chr1.228546601.228546900	10
chr1.228546901.228547200	1
chr1.228550201.228550500	8
chr1.228557401.228557700	4
chr1.228558601.228558900	1
chr1.228560701.228561000	2
chr1.228582901.228583200	6
chr1.228584401.228584700	1
chr1.228613501.228613800	2
chr1.228615001.228615300	70
chr1.228634201.228634500	1
chr1.228635401.228635700	7
chr1.228647401.228647700	4
chr1.228647701.228648000	1
chr1.228686101.228686400	45
chr1.228751801.228752100	1
chr1.228754201.228754500	1
chr1.228754801.228755100	1
chr1.228759601.228759900	1
chr1.228760201.228760500	1
chr1.228761401.228761700	1
chr1.228765901.228766200	2
chr1.228769501.228769800	1
chr1.228780001.228780300	1
chr1.228890401.228890700	47
chr1.228921601.228921900	2
chr1.22904101.22904400	1
chr1.22904701.22905000	3
chr1.22905301.22905600	22
chr1.22925101.22925400	14
chr1.22927801.22928100	5
chr1.22928101.22928400	7
chr1.229296901.229297200	1
chr1.229365901.229366200	3
chr1.229567801.229568100	2
chr1.229696201.229696500	2
chr1.229729801.229730100	1
chr1.229731301.229731600	1
chr1.229731601.229731900	1
chr1.22973701.22974000	75
chr1.229759201.229759500	41
chr1.229759501.229759800	3
chr1.23003701.23004000	9
chr1.2302201.2302500	22
chr1.230241301.230241600	12
chr1.230259001.230259300	4
chr1.2303401.2303700	1
chr1.23038801.23039100	21
chr1.230407501.230407800	1
chr1.230414701.230415000	64
chr1.230415601.230415900	20
chr1.2304301.2304600	1
chr1.230463901.230464200	1
chr1.230492401.230492700	3
chr1.230494801.230495100	2
chr1.2305201.2305500	1
chr1.231006301.231006600	3
chr1.231038401.231038700	2
chr1.23110801.23111100	33
chr1.231294301.231294600	1
chr1.231531901.231532200	1
chr1.231666301.231666600	70
chr1.232449901.232450200	2
chr1.2325301.2325600	1
chr1.232767601.232767900	1
chr1.23279401.23279700	3
chr1.232938901.232939200	22
chr1.233123401.233123700	4
chr1.2333401.2333700	6
chr1.23343601.23343900	1
chr1.233465401.233465700	12
chr1.23348101.23348400	2
chr1.2337601.2337900	30
chr1.2338201.2338500	1
chr1.2343001.2343300	11
chr1.234342001.234342300	1
chr1.234548701.234549000	13
chr1.234559201.234559500	2
chr1.2346601.2346900	6
chr1.234680401.234680700	3
chr1.234792601.234792900	2
chr1.234792901.234793200	3
chr1.234881401.234881700	7
chr1.234914101.234914400	3
chr1.235242301.235242600	1
chr1.235267201.235267500	3
chr1.235322101.235322400	1
chr1.235322401.235322700	7
chr1.235326301.235326600	7
chr1.235804801.235805100	6
chr1.235805401.235805700	36
chr1.235807501.235807800	4
chr1.235836901.235837200	1
chr1.2358901.2359200	3
chr1.236032501.236032800	2
chr1.2361301.2361600	1
chr1.236155501.236155800	1
chr1.236157001.236157300	1
chr1.236157601.236157900	10
chr1.236511001.236511300	1
chr1.236765401.236765700	2
chr1.236848801.236849100	2
chr1.23693401.23693700	2
chr1.236961001.236961300	1
chr1.23762101.23762400	2
chr1.23762401.23762700	2
chr1.237634201.237634500	19
chr1.23763901.23764200	1
chr1.238106701.238107000	1
chr1.2386501.2386800	13
chr1.2387101.2387400	1
chr1.23894101.23894400	2
chr1.2389501.2389800	3
chr1.2389801.2390100	1
chr1.23917201.23917500	2
chr1.23947201.23947500	1
chr1.24016501.24016800	7
chr1.240307801.240308100	1
chr1.240370801.240371100	12
chr1.240371101.240371400	11
chr1.240371401.240371700	50
chr1.240372901.240373200	6
chr1.240373201.240373500	2
chr1.240568501.240568800	7
chr1.240569101.240569400	6
chr1.240569401.240569700	11
chr1.240569701.240570000	1
chr1.24063601.24063900	2
chr1.240655201.240655500	2
chr1.240656401.240656700	4
chr1.240657001.240657300	3
chr1.2408701.2409000	1
chr1.240874201.240874500	9
chr1.2409601.2409900	3
chr1.240987601.240987900	7
chr1.24102601.24102900	1
chr1.24116401.24116700	9
chr1.24118801.24119100	46
chr1.2412901.2413200	4
chr1.2414401.2414700	1
chr1.2414701.2415000	4
chr1.2415601.2415900	1
chr1.241696201.241696500	1
chr1.2417401.2417700	4
chr1.242013301.242013600	17
chr1.24228301.24228600	2
chr1.24284401.24284700	3
chr1.24284701.24285000	2
chr1.243264601.243264900	32
chr1.243584401.243584700	3
chr1.2436001.2436300	1
chr1.243638101.243638400	3
chr1.243638401.243638700	1
chr1.243647101.243647400	1
chr1.243647401.243647700	1
chr1.243648001.243648300	19
chr1.243649501.243649800	2
chr1.243652201.243652500	3
chr1.243653401.243653700	1
chr1.243653701.243654000	117
chr1.24395101.24395400	1
chr1.2440501.2440800	1
chr1.244142701.244143000	2
chr1.2441701.2442000	1
chr1.2442001.2442300	31
chr1.244218001.244218300	1
chr1.2443201.2443500	6
chr1.244439401.244439700	1
chr1.244467601.244467900	7
chr1.244532701.244533000	1
chr1.244534801.244535100	37
chr1.244625101.244625400	12
chr1.244626601.244626900	2
chr1.2446501.2446800	1
chr1.244815001.244815300	1
chr1.244892101.244892400	12
chr1.24512701.24513000	1
chr1.245130901.245131200	2
chr1.24521401.24521700	2
chr1.245315401.245315700	4
chr1.245320801.245321100	3
chr1.2454301.2454600	3
chr1.245496601.245496900	29
chr1.245499901.245500200	8
chr1.245739301.245739600	48
chr1.245740801.245741100	2
chr1.245742901.245743200	6
chr1.245752501.245752800	6
chr1.245835601.245835900	14
chr1.245840101.245840400	1
chr1.245846401.245846700	2
chr1.2459101.2459400	58
chr1.246060901.246061200	2
chr1.246137701.246138000	1
chr1.246138001.246138300	5
chr1.246138301.246138600	1
chr1.246138901.246139200	3
chr1.246139801.246140100	1
chr1.246414301.246414600	1
chr1.246415801.246416100	2
chr1.246845101.246845400	2
chr1.2469001.2469300	3
chr1.246951901.246952200	2
chr1.246952801.246953100	1
chr1.246958501.246958800	12
chr1.247093201.247093500	41
chr1.247170601.247170900	4
chr1.247243501.247243800	1
chr1.2472601.2472900	51
chr1.247268401.247268700	4
chr1.2472901.2473200	1
chr1.24741601.24741900	7
chr1.247466101.247466400	6
chr1.247492201.247492500	1
chr1.247493401.247493700	1
chr1.247496101.247496400	6
chr1.247497601.247497900	2
chr1.247615801.247616100	2
chr1.247803601.247803900	1
chr1.248019901.248020200	1
chr1.248022001.248022300	5
chr1.248099701.248100000	2
chr1.248100301.248100600	6
chr1.248100601.248100900	1
chr1.248894401.248894700	2
chr1.249104401.249104700	1
chr1.249106201.249106500	21
chr1.249106501.249106800	3
chr1.249134401.249134700	2
chr1.249140101.249140400	1
chr1.249141901.249142200	2
chr1.249165301.249165600	31
chr1.25011601.25011900	2
chr1.25069201.25069500	3
chr1.25069501.25069800	23
chr1.25070701.25071000	1
chr1.25071001.25071300	9
chr1.25073401.25073700	18
chr1.25074001.25074300	25
chr1.2515201.2515500	3
chr1.25198201.25198500	8
chr1.2520301.2520600	2
chr1.25226701.25227000	8
chr1.25229401.25229700	5
chr1.25236901.25237200	3
chr1.25246801.25247100	5
chr1.25247101.25247400	1
chr1.25250101.25250400	2
chr1.25254001.25254300	4
chr1.25257301.25257600	11
chr1.2526901.2527200	15
chr1.25273501.25273800	34
chr1.2527501.2527800	11
chr1.2529001.2529300	90
chr1.2538901.2539200	1
chr1.2539801.2540100	1
chr1.25567801.25568100	1
chr1.25568101.25568400	2
chr1.25595401.25595700	1
chr1.2576101.2576400	2
chr1.25869001.25869300	9
chr1.25944901.25945200	1
chr1.26098201.26098500	14
chr1.26098501.26098800	5
chr1.26204101.26204400	2
chr1.26204401.26204700	17
chr1.26247001.26247300	3
chr1.26322901.26323200	2
chr1.26325001.26325300	8
chr1.26364001.26364300	13
chr1.26440501.26440800	1
chr1.26440801.26441100	1
chr1.26491201.26491500	34
chr1.26496901.26497200	3
chr1.26497501.26497800	8
chr1.26498101.26498400	1
chr1.26498401.26498700	1
chr1.26553301.26553600	2
chr1.26562301.26562600	2
chr1.26634301.26634600	3
chr1.26661301.26661600	1
chr1.26672701.26673000	1
chr1.26688301.26688600	29
chr1.26907301.26907600	6
chr1.2708401.2708700	4
chr1.27144001.27144300	1
chr1.27144301.27144600	1
chr1.27152101.27152400	7
chr1.27152401.27152700	4
chr1.2717101.2717400	1
chr1.27192601.27192900	1
chr1.27214501.27214800	43
chr1.27228301.27228600	2
chr1.27321901.27322200	5
chr1.27322201.27322500	1
chr1.27332401.27332700	1
chr1.27339601.27339900	2
chr1.27340201.27340500	21
chr1.27480601.27480900	34
chr1.27483001.27483300	11
chr1.27525901.27526200	1
chr1.27526201.27526500	32
chr1.27675601.27675900	8
chr1.27676201.27676500	1
chr1.27676501.27676800	1
chr1.27678001.27678300	5
chr1.27679801.27680100	4
chr1.27683701.27684000	2
chr1.27687001.27687300	2
chr1.27687301.27687600	2
chr1.27690601.27690900	2
chr1.27708001.27708300	2
chr1.27720001.27720300	2
chr1.27720601.27720900	24
chr1.2773501.2773800	3
chr1.2774401.2774700	3
chr1.2775901.2776200	3
chr1.2777101.2777400	1
chr1.2777701.2778000	1
chr1.2778601.2778900	3
chr1.2779201.2779500	1
chr1.27875101.27875400	22
chr1.27891301.27891600	6
chr1.27893701.27894000	1
chr1.27899401.27899700	2
chr1.27939901.27940200	2
chr1.27940801.27941100	42
chr1.27941101.27941400	2
chr1.27963001.27963300	1
chr1.27993901.27994200	3
chr1.27994501.27994800	1
chr1.27995101.27995400	1
chr1.27995401.27995700	5
chr1.28050301.28050600	3
chr1.28098301.28098600	4
chr1.28189501.28189800	5
chr1.28197301.28197600	1
chr1.28243201.28243500	1
chr1.2826901.2827200	1
chr1.28284901.28285200	23
chr1.28416301.28416600	4
chr1.28416901.28417200	5
chr1.2845801.2846100	2
chr1.2848501.2848800	27
chr1.28495501.28495800	1
chr1.2850601.2850900	1
chr1.28558201.28558500	4
chr1.28571701.28572000	16
chr1.28572001.28572300	1
chr1.28572301.28572600	6
chr1.28583701.28584000	1
chr1.28641601.28641900	19
chr1.28641901.28642200	2
chr1.28694101.28694400	1
chr1.2876701.2877000	2
chr1.2878801.2879100	1
chr1.28855501.28855800	2
chr1.2886601.2886900	34
chr1.28880701.28881000	8
chr1.28881001.28881300	34
chr1.2888401.2888700	7
chr1.28909201.28909500	1
chr1.28909501.28909800	2
chr1.28917601.28917900	8
chr1.28919701.28920000	1
chr1.28920901.28921200	3
chr1.29061901.29062200	5
chr1.29102701.29103000	47
chr1.29139601.29139900	2
chr1.29139901.29140200	11
chr1.29189101.29189400	3
chr1.29189401.29189700	2
chr1.29189701.29190000	2
chr1.2919301.2919600	25
chr1.2927701.2928000	5
chr1.2931001.2931300	2
chr1.2937301.2937600	11
chr1.2938501.2938800	11
chr1.29446201.29446500	6
chr1.29451901.29452200	1
chr1.29452501.29452800	6
chr1.29462401.29462700	3
chr1.29584801.29585100	94
chr1.2977801.2978100	10
chr1.29806801.29807100	2
chr1.2989201.2989500	3
chr1.2991601.2991900	2
chr1.2992201.2992500	1
chr1.2992501.2992800	2
chr1.2995801.2996100	2
chr1.2997301.2997600	1
chr1.2999401.2999700	1
chr1.3000001.3000300	9
chr1.3026401.3026700	1
chr1.3028201.3028500	3
chr1.3029101.3029400	1
chr1.3029401.3029700	1
chr1.3036301.3036600	1
chr1.3038701.3039000	1
chr1.3055801.3056100	11
chr1.3056701.3057000	2
chr1.3059701.3060000	3
chr1.3070501.3070800	12
chr1.3073801.3074100	1
chr1.3074101.3074400	25
chr1.3086701.3087000	4
chr1.3100501.3100800	2
chr1.3102001.3102300	3
chr1.3103201.3103500	2
chr1.3104701.3105000	4
chr1.3106201.3106500	7
chr1.31188901.31189200	1
chr1.31190701.31191000	8
chr1.31220701.31221000	1
chr1.31245901.31246200	6
chr1.31247401.31247700	1
chr1.31247701.31248000	1
chr1.31248001.31248300	1
chr1.31279501.31279800	15
chr1.31279801.31280100	2
chr1.3134101.3134400	5
chr1.3147001.3147300	1
chr1.3148501.3148800	1
chr1.31540501.31540800	17
chr1.3159901.3160200	1
chr1.3161701.3162000	3
chr1.31625401.31625700	1
chr1.31626001.31626300	1
chr1.31627201.31627500	2
chr1.3163201.3163500	1
chr1.3164401.3164700	5
chr1.3165901.3166200	12
chr1.3180901.3181200	19
chr1.31884001.31884300	4
chr1.31887001.31887300	1
chr1.31887301.31887600	1
chr1.31904401.31904700	112
chr1.31904701.31905000	20
chr1.31921201.31921500	1
chr1.3193201.3193500	6
chr1.3194101.3194400	1
chr1.3195001.3195300	1
chr1.32002501.32002800	3
chr1.3204901.3205200	3
chr1.3205201.3205500	1
chr1.32055601.32055900	1
chr1.3205801.3206100	3
chr1.32171101.32171400	1
chr1.32181901.32182200	2
chr1.32182201.32182500	1
chr1.32206801.32207100	1
chr1.32208901.32209200	3
chr1.32209801.32210100	2
chr1.32237101.32237400	2
chr1.32256301.32256600	9
chr1.3229501.3229800	1
chr1.3238201.3238500	1
chr1.3239101.3239400	9
chr1.3239401.3239700	27
chr1.3239701.3240000	12
chr1.32405101.32405400	4
chr1.32406001.32406300	1
chr1.3241201.3241500	6
chr1.32481301.32481600	2
chr1.3251701.3252000	1
chr1.32537101.32537400	4
chr1.32576101.32576400	11
chr1.32669401.32669700	10
chr1.32688901.32689200	4
chr1.3269401.3269700	4
chr1.3273001.3273300	8
chr1.32741401.32741700	1
chr1.32742601.32742900	1
chr1.3276001.3276300	2
chr1.3278701.3279000	1
chr1.32815201.32815500	4
chr1.32816101.32816400	25
chr1.32824801.32825100	4
chr1.32857801.32858100	3
chr1.3290101.3290400	2
chr1.32928601.32928900	2
chr1.3304801.3305100	2
chr1.3307501.3307800	30
chr1.3309901.3310200	54
chr1.3310201.3310500	14
chr1.3310501.3310800	68
chr1.3310801.3311100	1
chr1.3311101.3311400	1
chr1.33114301.33114600	15
chr1.33166801.33167100	4
chr1.3320701.3321000	6
chr1.33220201.33220500	3
chr1.33232501.33232800	1
chr1.3327301.3327600	1
chr1.3332101.3332400	5
chr1.33360901.33361200	4
chr1.33367501.33367800	1
chr1.3339901.3340200	3
chr1.33428701.33429000	1
chr1.33429001.33429300	2
chr1.3349501.3349800	1
chr1.3350101.3350400	2
chr1.33504001.33504300	1
chr1.33516901.33517200	74
chr1.33517201.33517500	11
chr1.33517801.33518100	1
chr1.33545401.33545700	4
chr1.33622501.33622800	1
chr1.33645301.33645600	2
chr1.3371701.3372000	1
chr1.33720001.33720300	11
chr1.3372001.3372300	2
chr1.3373501.3373800	1
chr1.33742201.33742500	1
chr1.33770101.33770400	1
chr1.33772501.33772800	1
chr1.33772801.33773100	17
chr1.33897901.33898200	1
chr1.33938701.33939000	1
chr1.33939001.33939300	2
chr1.3394201.3394500	15
chr1.3396901.3397200	3
chr1.34091101.34091400	1
chr1.3428401.3428700	1
chr1.3429001.3429300	1
chr1.3429301.3429600	1
chr1.3433801.3434100	3
chr1.3435301.3435600	13
chr1.3436801.3437100	1
chr1.3446701.3447000	6
chr1.34627201.34627500	4
chr1.34628101.34628400	4
chr1.3499201.3499500	27
chr1.3500101.3500400	2
chr1.3501301.3501600	17
chr1.3512701.3513000	3
chr1.3513001.3513300	5
chr1.35245801.35246100	3
chr1.35250901.35251200	2
chr1.3525601.3525900	1
chr1.35260501.35260800	3
chr1.35331001.35331300	3
chr1.35398201.35398500	1
chr1.35440201.35440500	6
chr1.35442601.35442900	1
chr1.3556201.3556500	2
chr1.3557701.3558000	1
chr1.35584201.35584500	2
chr1.3562501.3562800	22
chr1.3562801.3563100	2
chr1.3564901.3565200	8
chr1.35660401.35660700	9
chr1.3571501.3571800	16
chr1.36038401.36038700	10
chr1.36038701.36039000	2
chr1.36039001.36039300	2
chr1.36045001.36045300	1
chr1.3605101.3605400	1
chr1.3608401.3608700	1
chr1.36107701.36108000	12
chr1.36108601.36108900	54
chr1.3621901.3622200	1
chr1.36236701.36237000	3
chr1.36272701.36273000	1
chr1.36283801.36284100	4
chr1.3635401.3635700	3
chr1.3647401.3647700	1
chr1.36591301.36591600	26
chr1.36591601.36591900	8
chr1.36592501.36592800	1
chr1.3662101.3662400	4
chr1.3662401.3662700	6
chr1.36641401.36641700	3
chr1.36642301.36642600	17
chr1.36643801.36644100	1
chr1.36644401.36644700	8
chr1.3664501.3664800	3
chr1.36688501.36688800	2
chr1.36715201.36715500	1
chr1.36769801.36770100	1
chr1.36774001.36774300	1
chr1.36774901.36775200	3
chr1.36787501.36787800	1
chr1.36787801.36788100	1
chr1.36790801.36791100	18
chr1.36805501.36805800	2
chr1.36807001.36807300	1
chr1.36814501.36814800	1
chr1.36815701.36816000	1
chr1.3686701.3687000	7
chr1.3691501.3691800	11
chr1.3702601.3702900	2
chr1.3727801.3728100	2
chr1.3729901.3730200	5
chr1.3732001.3732300	1
chr1.3733801.3734100	1
chr1.3771001.3771300	6
chr1.3771301.3771600	3
chr1.3771601.3771900	2
chr1.3776401.3776700	1
chr1.37783801.37784100	1
chr1.3789301.3789600	3
chr1.38018401.38018700	20
chr1.38021101.38021400	20
chr1.38021701.38022000	1
chr1.38022301.38022600	5
chr1.38060101.38060400	7
chr1.3807901.3808200	1
chr1.3809101.3809400	1
chr1.38102401.38102700	36
chr1.3810601.3810900	14
chr1.38134501.38134800	1
chr1.38159701.38160000	5
chr1.3818101.3818400	2
chr1.38220301.38220600	12
chr1.3825601.3825900	6
chr1.38456701.38457000	1
chr1.38459401.38459700	1
chr1.38463001.38463300	2
chr1.38472301.38472600	1
chr1.38514301.38514600	14
chr1.39282301.39282600	1
chr1.39327301.39327600	8
chr1.39336301.39336600	60
chr1.39546301.39546600	1
chr1.39955801.39956100	2
chr1.39958501.39958800	2
chr1.39959101.39959400	22
chr1.39978601.39978900	14
chr1.39979501.39979800	1
chr1.39979801.39980100	6
chr1.39981901.39982200	13
chr1.40039201.40039500	1
chr1.40107301.40107600	4
chr1.40148701.40149000	2
chr1.40202101.40202400	1
chr1.40237801.40238100	1
chr1.40255201.40255500	5
chr1.40331401.40331700	8
chr1.40350301.40350600	19
chr1.40350601.40350900	3
chr1.40565101.40565400	9
chr1.40598401.40598700	9
chr1.40768201.40768500	2
chr1.40768501.40768800	1
chr1.40768801.40769100	1
chr1.40779001.40779300	3
chr1.4079401.4079700	1
chr1.40996201.40996500	1
chr1.41114401.41114700	2
chr1.41120101.41120400	2
chr1.41132101.41132400	5
chr1.41155201.41155500	4
chr1.41250601.41250900	6
chr1.41301601.41301900	80
chr1.41303401.41303700	4
chr1.41304601.41304900	3
chr1.41325901.41326200	1
chr1.41348101.41348400	7
chr1.41348401.41348700	2
chr1.41349601.41349900	12
chr1.41481601.41481900	5
chr1.41825101.41825400	15
chr1.41834401.41834700	3
chr1.41887801.41888100	3
chr1.4192201.4192500	1
chr1.4194301.4194600	2
chr1.41994601.41994900	1
chr1.42272701.42273000	1
chr1.42802201.42802500	9
chr1.42921001.42921300	1
chr1.42921301.42921600	1
chr1.42923401.42923700	26
chr1.42923701.42924000	1
chr1.42927601.42927900	8
chr1.43204201.43204500	4
chr1.43205701.43206000	11
chr1.43206001.43206300	93
chr1.43250101.43250400	2
chr1.43252801.43253100	2
chr1.43284901.43285200	1
chr1.43354801.43355100	1
chr1.43400701.43401000	4
chr1.43405501.43405800	8
chr1.43426801.43427100	1
chr1.43531801.43532100	1
chr1.43532101.43532400	1
chr1.43532401.43532700	1
chr1.43736401.43736700	1
chr1.437701.438000	1
chr1.43770301.43770600	2
chr1.43770901.43771200	1
chr1.43815301.43815600	2
chr1.43815601.43815900	1
chr1.43826701.43827000	4
chr1.43834801.43835100	2
chr1.43857901.43858200	23
chr1.43998301.43998600	12
chr1.44029201.44029500	1
chr1.44055601.44055900	16
chr1.44056801.44057100	2
chr1.44057401.44057700	1
chr1.44062201.44062500	2
chr1.44064601.44064900	1
chr1.44069101.44069400	2
chr1.44069401.44069700	8
chr1.44070001.44070300	1
chr1.44073001.44073300	1
chr1.44114701.44115000	12
chr1.44115001.44115300	26
chr1.44401201.44401500	2
chr1.44437201.44437500	2
chr1.44446501.44446800	1
chr1.44494501.44494800	1
chr1.44569801.44570100	14
chr1.44703901.44704200	1
chr1.44869501.44869800	2
chr1.448801.449100	1
chr1.449101.449400	92
chr1.449401.449700	6
chr1.450301.450600	8
chr1.45099301.45099600	55
chr1.45188401.45188700	3
chr1.45189601.45189900	2
chr1.45204301.45204600	1
chr1.45207601.45207900	1
chr1.45240001.45240300	1
chr1.45240301.45240600	10
chr1.45247801.45248100	11
chr1.45248701.45249000	4
chr1.45263401.45263700	1
chr1.45279601.45279900	2
chr1.45283501.45283800	4
chr1.45284101.45284400	2
chr1.45309001.45309300	1
chr1.45454201.45454500	7
chr1.45768601.45768900	2
chr1.45771301.45771600	1
chr1.45804901.45805200	14
chr1.45957301.45957600	3
chr1.45989101.45989400	2
chr1.46014901.46015200	2
chr1.46048801.46049100	2
chr1.46087801.46088100	1
chr1.46088701.46089000	1
chr1.46089001.46089300	3
chr1.46091101.46091400	2
chr1.46215001.46215300	1
chr1.46266901.46267200	28
chr1.46267201.46267500	8
chr1.46631701.46632000	40
chr1.46667101.46667400	1
chr1.46705501.46705800	4
chr1.46707601.46707900	17
chr1.46707901.46708200	5
chr1.46793701.46794000	12
chr1.46804501.46804800	2
chr1.46857901.46858200	6
chr1.46860901.46861200	2
chr1.46934101.46934400	2
chr1.46950001.46950300	4
chr1.46950301.46950600	6
chr1.46950601.46950900	1
chr1.4707601.4707900	1
chr1.47078701.47079000	2
chr1.4726501.4726800	4
chr1.4726801.4727100	50
chr1.47488501.47488800	4
chr1.47488801.47489100	2
chr1.47489101.47489400	3
chr1.47694301.47694600	23
chr1.47694601.47694900	8
chr1.4770001.4770300	1
chr1.4770601.4770900	7
chr1.4771501.4771800	4
chr1.4774201.4774500	4
chr1.47800801.47801100	1
chr1.47883001.47883300	1
chr1.47883301.47883600	6
chr1.47899201.47899500	5
chr1.48057001.48057300	9
chr1.48057901.48058200	4
chr1.48058201.48058500	1
chr1.48224401.48224700	9
chr1.4833301.4833600	2
chr1.4834501.4834800	3
chr1.5033101.5033400	22
chr1.50490301.50490600	1
chr1.51312001.51312300	1
chr1.51808801.51809100	1
chr1.52197301.52197600	1
chr1.52497301.52497600	1
chr1.53066101.53066400	1
chr1.53163301.53163600	1
chr1.53386501.53386800	10
chr1.53386801.53387100	18
chr1.53387701.53388000	1
chr1.53394301.53394600	1
chr1.534301.534600	5
chr1.534901.535200	1
chr1.53544601.53544900	2
chr1.53546101.53546400	2
chr1.53546401.53546700	2
chr1.53556601.53556900	3
chr1.53560201.53560500	5
chr1.53703001.53703300	9
chr1.53740501.53740800	2
chr1.53741701.53742000	3
chr1.53794801.53795100	1
chr1.53904001.53904300	5
chr1.53905801.53906100	3
chr1.53925001.53925300	10
chr1.54127201.54127500	6
chr1.54412801.54413100	1
chr1.546601.546900	1
chr1.54699901.54700200	2
chr1.54723901.54724200	1
chr1.54725101.54725400	57
chr1.54726001.54726300	5
chr1.54821401.54821700	11
chr1.54855601.54855900	1
chr1.54925201.54925500	4
chr1.54951901.54952200	1
chr1.54966301.54966600	3
chr1.55010401.55010700	2
chr1.55179901.55180200	1
chr1.55247101.55247400	4
chr1.55247701.55248000	1
chr1.55266301.55266600	1
chr1.55447201.55447500	2
chr1.55460401.55460700	2
chr1.55507801.55508100	14
chr1.55753801.55754100	10
chr1.56438701.56439000	1
chr1.56941801.56942100	9
chr1.56943901.56944200	1
chr1.57024601.57024900	2
chr1.5770801.5771100	1
chr1.5771701.5772000	1
chr1.58627801.58628100	1
chr1.58716001.58716300	7
chr1.59010601.59010900	22
chr1.59043001.59043300	1
chr1.59368501.59368800	2
chr1.5937601.5937900	1
chr1.60174901.60175200	1
chr1.6049801.6050100	11
chr1.6054301.6054600	2
chr1.6084901.6085200	2
chr1.6111601.6111900	3
chr1.6130801.6131100	7
chr1.6131101.6131400	2
chr1.61507501.61507800	3
chr1.61579201.61579500	2
chr1.61579501.61579800	1
chr1.6186001.6186300	7
chr1.6186601.6186900	10
chr1.6187801.6188100	1
chr1.6188101.6188400	3
chr1.6200101.6200400	2
chr1.6203101.6203400	1
chr1.6209401.6209700	2
chr1.6209701.6210000	21
chr1.6210001.6210300	2
chr1.62119801.62120100	1
chr1.62189701.62190000	3
chr1.62191801.62192100	2
chr1.62192101.62192400	1
chr1.6243001.6243300	11
chr1.62609401.62609700	2
chr1.6264601.6264900	6
chr1.62658301.62658600	10
chr1.62660101.62660400	40
chr1.62660401.62660700	12
chr1.62662801.62663100	27
chr1.6268501.6268800	2
chr1.6270001.6270300	9
chr1.6270601.6270900	1
chr1.62725801.62726100	21
chr1.62751901.62752200	2
chr1.62785501.62785800	2
chr1.62904901.62905200	3
chr1.6307501.6307800	22
chr1.6310501.6310800	7
chr1.6313801.6314100	1
chr1.6315301.6315600	1
chr1.6318001.6318300	1
chr1.6318301.6318600	5
chr1.63192301.63192600	3
chr1.6322501.6322800	1
chr1.6362401.6362700	4
chr1.6454801.6455100	5
chr1.64937401.64937700	3
chr1.64972201.64972500	4
chr1.6510901.6511200	7
chr1.6511201.6511500	1
chr1.6512101.6512400	4
chr1.6514501.6514800	32
chr1.6515101.6515400	2
chr1.6515401.6515700	2
chr1.6520501.6520800	1
chr1.6521401.6521700	4
[truncated: 22,851 more rows]

## Sheet: 10_6_CRC
DMR	N_of_occurrence
chr1.100170001.100170300	6
chr1.1002001.1002300	7
chr1.10059301.10059600	1
chr1.100596001.100596300	3
chr1.100679101.100679400	1
chr1.1006801.1007100	17
chr1.10091701.10092000	101
chr1.10094701.10095000	1
chr1.100966201.100966500	3
chr1.1009801.1010100	2
chr1.1011301.1011600	18
chr1.1012501.1012800	21
chr1.1012801.1013100	1
chr1.1013401.1013700	2
chr1.1020601.1020900	1
chr1.1024501.1024800	17
chr1.10268401.10268700	2
chr1.10268701.10269000	5
chr1.10386001.10386300	22
chr1.10458301.10458600	2
chr1.1046401.1046700	1
chr1.10491901.10492200	1
chr1.1053301.1053600	10
chr1.10534501.10534800	1
chr1.10534801.10535100	2
chr1.10557301.10557600	5
chr1.106623301.106623600	1
chr1.106625701.106626000	8
chr1.10697101.10697400	2
chr1.10697401.10697700	2
chr1.10697701.10698000	7
chr1.10698901.10699200	4
chr1.10703101.10703400	2
chr1.10704301.10704600	4
chr1.10707601.10707900	7
chr1.10708801.10709100	1
chr1.10709701.10710000	6
chr1.10712401.10712700	1
chr1.10715401.10715700	1
chr1.1071601.1071900	1
chr1.10719001.10719300	1
chr1.10722901.10723200	3
chr1.10725001.10725300	1
chr1.1074301.1074600	1
chr1.10758301.10758600	10
chr1.10764001.10764300	1
chr1.10765501.10765800	2
chr1.108022501.108022800	3
chr1.10813501.10813800	4
chr1.108199501.108199800	2
chr1.108509101.108509400	1
chr1.108595501.108595800	3
chr1.108815701.108816000	1
chr1.108816301.108816600	4
chr1.10898101.10898400	3
chr1.109159501.109159800	16
chr1.109203301.109203600	1
chr1.109506301.109506600	1
chr1.1095301.1095600	1
chr1.109585801.109586100	57
chr1.109616401.109616700	12
chr1.109619101.109619400	1
chr1.109620001.109620300	2
chr1.109631101.109631400	1
chr1.109641601.109641900	1
chr1.109755601.109755900	23
chr1.109794301.109794600	1
chr1.109803001.109803300	3
chr1.109827601.109827900	5
chr1.109842301.109842600	1
chr1.109967101.109967400	1
chr1.10997701.10998000	1
chr1.110008201.110008500	3
chr1.1100401.1100700	32
chr1.110050501.110050800	1
chr1.110051101.110051400	1
chr1.1100701.1101000	6
chr1.110187001.110187300	1
chr1.110187301.110187600	4
chr1.110212201.110212500	2
chr1.11040001.11040300	95
chr1.110526001.110526300	7
chr1.1107301.1107600	2
chr1.11074801.11075100	28
chr1.1108801.1109100	1
chr1.1109401.1109700	3
chr1.110949001.110949300	18
chr1.1109701.1110000	7
chr1.1110901.1111200	2
chr1.111150901.111151200	1
chr1.111151201.111151500	5
chr1.11121001.11121300	1
chr1.1112101.1112400	2
chr1.111321901.111322200	2
chr1.1115401.1115700	2
chr1.11157601.11157900	6
chr1.111813601.111813900	1
chr1.112284901.112285200	3
chr1.11236501.11236800	2
chr1.112387501.112387800	1
chr1.113007301.113007600	1
chr1.1131601.1131900	2
chr1.113163901.113164200	1
chr1.11320801.11321100	26
chr1.11324101.11324400	3
chr1.113285701.113286000	11
chr1.113286001.113286300	28
chr1.113286301.113286600	3
chr1.11331301.11331600	18
chr1.113369101.113369400	1
chr1.113499301.113499600	58
chr1.113499601.113499900	31
chr1.1135201.1135500	2
chr1.1135801.1136100	3
chr1.113613901.113614200	2
chr1.1137301.1137600	14
chr1.1140601.1140900	2
chr1.114355501.114355800	13
chr1.1143601.1143900	1
chr1.1144501.1144800	9
chr1.114469801.114470100	1
chr1.1144801.1145100	2
chr1.1146601.1146900	3
chr1.115321501.115321800	1
chr1.1153501.1153800	1
chr1.11559601.11559900	2
chr1.11559901.11560200	5
chr1.11562601.11562900	8
chr1.11587801.11588100	2
chr1.11594701.11595000	7
chr1.11598301.11598600	3
chr1.1161001.1161300	1
chr1.1161601.1161900	11
chr1.116184001.116184300	1
chr1.1165501.1165800	1
chr1.116693101.116693400	1
chr1.116710201.116710500	1
chr1.116711701.116712000	9
chr1.1168201.1168500	1
chr1.1169401.1169700	23
chr1.116961901.116962200	1
chr1.117018001.117018300	37
chr1.117075601.117075900	46
chr1.117076801.117077100	1
chr1.117078001.117078300	1
chr1.1170901.1171200	27
chr1.11713801.11714100	1
chr1.117169501.117169800	56
chr1.117285301.117285600	2
chr1.1173001.1173300	2
chr1.117450601.117450900	3
chr1.1174801.1175100	10
chr1.117662101.117662400	1
chr1.11781301.11781600	9
chr1.11794201.11794500	1
chr1.118146901.118147200	9
chr1.118147501.118147800	7
chr1.11821201.11821500	4
chr1.1183201.1183500	3
chr1.1183801.1184100	5
chr1.118727401.118727700	2
chr1.1188601.1188900	18
chr1.11896201.11896500	2
chr1.11898601.11898900	10
chr1.11899801.11900100	2
chr1.1191601.1191900	1
chr1.11984401.11984700	1
chr1.11987101.11987400	1
chr1.11992801.11993100	7
chr1.11993401.11993700	1
chr1.120147601.120147900	6
chr1.120165001.120165300	2
chr1.120165901.120166200	3
chr1.120166501.120166800	3
chr1.1203901.1204200	18
chr1.120438601.120438900	1
chr1.1204501.1204800	1
chr1.12051001.12051300	1
chr1.1205101.1205400	15
chr1.1207201.1207500	5
chr1.120903001.120903300	3
chr1.120907801.120908100	4
chr1.120923701.120924000	3
chr1.121259701.121260000	6
chr1.121261501.121261800	12
chr1.12239101.12239400	8
chr1.12251401.12251700	3
chr1.12251701.12252000	2
chr1.1227601.1227900	3
chr1.12291901.12292200	1
chr1.1230901.1231200	24
chr1.1231201.1231500	3
chr1.1232101.1232400	4
chr1.1252201.1252500	1
chr1.1255501.1255800	6
chr1.12579001.12579300	10
chr1.12579301.12579600	1
chr1.12600601.12600900	14
chr1.12602401.12602700	3
chr1.1262401.1262700	2
chr1.1265101.1265400	1
chr1.12681901.12682200	11
chr1.12717901.12718200	1
chr1.1273201.1273500	1
chr1.1292401.1292700	1
chr1.1295401.1295700	3
chr1.1308301.1308600	12
chr1.132901.133200	6
chr1.133801.134100	10
chr1.135301.135600	1
chr1.1353601.1353900	1
chr1.1361101.1361400	1
chr1.1372801.1373100	1
chr1.1373701.1374000	3
chr1.1387801.1388100	1
chr1.13879201.13879500	13
chr1.1388701.1389000	1
chr1.1389301.1389600	2
chr1.1390501.1390800	1
chr1.1397701.1398000	2
chr1.1404901.1405200	1
chr1.1409101.1409400	8
chr1.1413301.1413600	5
chr1.1414201.1414500	8
chr1.1414801.1415100	1
chr1.1419901.1420200	2
chr1.142539001.142539300	2
chr1.142539301.142539600	18
chr1.142619101.142619400	1
chr1.142890901.142891200	3
chr1.142891501.142891800	1
chr1.143270101.143270400	1
chr1.143271601.143271900	7
chr1.143646601.143646900	11
chr1.143646901.143647200	32
chr1.143663701.143664000	121
chr1.143666101.143666400	5
chr1.1442401.1442700	1
chr1.144301201.144301500	1
chr1.144309601.144309900	1
chr1.144310501.144310800	4
chr1.144481201.144481500	1
chr1.1445101.1445400	1
chr1.144534301.144534600	1
chr1.1445401.1445700	1
chr1.1448401.1448700	1
chr1.1449001.1449300	8
chr1.1450201.1450500	7
chr1.145076101.145076400	1
chr1.145076401.145076700	64
chr1.145137601.145137900	3
chr1.1452301.1452600	1
chr1.145380601.145380900	10
chr1.145380901.145381200	1
chr1.145381501.145381800	2
chr1.145383001.145383300	1
chr1.145385401.145385700	1
chr1.145469101.145469400	1
chr1.145508701.145509000	4
chr1.145574401.145574700	6
chr1.145587601.145587900	3
chr1.145609501.145609800	2
chr1.145611601.145611900	16
chr1.145827601.145827900	1
chr1.145944301.145944600	2
chr1.145945501.145945800	3
chr1.145962301.145962600	1
chr1.1459801.1460100	1
chr1.145980301.145980600	6
chr1.146090401.146090700	15
chr1.1463101.1463400	7
chr1.146367601.146367900	7
chr1.146524201.146524500	1
chr1.146544601.146544900	6
chr1.146549101.146549400	1
chr1.146549401.146549700	7
chr1.146551201.146551500	16
chr1.146555101.146555400	23
chr1.146642101.146642400	1
chr1.1468501.1468800	3
chr1.147143101.147143400	9
chr1.147380401.147380700	3
chr1.147487201.147487500	8
chr1.147487501.147487800	15
chr1.147521701.147522000	1
chr1.147522001.147522300	1
chr1.147531601.147531900	9
chr1.147533701.147534000	1
chr1.1476001.1476300	206
chr1.147630001.147630300	6
chr1.147717001.147717300	1
chr1.147717301.147717600	3
chr1.147718501.147718800	4
chr1.1477201.1477500	15
chr1.147736801.147737100	1
chr1.147737401.147737700	16
chr1.147776101.147776400	100
chr1.147788401.147788700	6
chr1.147791401.147791700	1
chr1.147827101.147827400	1
chr1.147875401.147875700	1
chr1.147996001.147996300	3
chr1.148002001.148002300	3
chr1.148002301.148002600	1
chr1.148246801.148247100	3
chr1.148602901.148603200	1
chr1.148603201.148603500	13
chr1.148607401.148607700	81
chr1.148764601.148764900	1
chr1.148851901.148852200	6
chr1.148855501.148855800	9
chr1.148864501.148864800	1
chr1.148864801.148865100	3
chr1.148900501.148900800	2
chr1.148901701.148902000	1
chr1.1489501.1489800	1
chr1.1489801.1490100	13
chr1.149029201.149029500	26
chr1.1491001.1491300	10
chr1.149161501.149161800	14
chr1.149222101.149222400	6
chr1.149222701.149223000	25
chr1.149232601.149232900	1
chr1.149287501.149287800	4
chr1.149332801.149333100	4
chr1.149398501.149398800	1
chr1.149604001.149604300	2
chr1.149604601.149604900	1
chr1.149615701.149616000	1
chr1.1496401.1496700	1
chr1.149646301.149646600	2
chr1.149672701.149673000	1
chr1.149673001.149673300	1
chr1.149719201.149719500	15
chr1.149765401.149765700	11
chr1.149784301.149784600	1
chr1.149810101.149810400	1
chr1.149811301.149811600	7
chr1.149826301.149826600	1
chr1.149872801.149873100	2
chr1.149873401.149873700	2
chr1.149898001.149898300	1
chr1.149910901.149911200	23
chr1.150184501.150184800	9
chr1.150184801.150185100	9
chr1.150187501.150187800	4
chr1.150252901.150253200	2
chr1.150255901.150256200	2
chr1.150265201.150265500	2
chr1.150267901.150268200	5
chr1.150293401.150293700	5
chr1.150486001.150486300	6
chr1.150486601.150486900	1
chr1.150487201.150487500	1
chr1.150489301.150489600	11
chr1.150510301.150510600	1
chr1.150522601.150522900	10
chr1.150523801.150524100	1
chr1.150524101.150524400	32
chr1.150530701.150531000	1
chr1.150531001.150531300	1
chr1.150602701.150603000	1
chr1.1507501.1507800	20
chr1.150772501.150772800	1
chr1.1507801.1508100	16
chr1.1508401.1508700	1
chr1.150849301.150849600	2
chr1.150851101.150851400	46
chr1.151019401.151019700	7
chr1.151019701.151020000	6
chr1.151104301.151104600	2
chr1.151104601.151104900	4
chr1.151106101.151106400	5
chr1.151173001.151173300	36
chr1.15126001.15126300	1
chr1.15128401.15128700	18
chr1.151317601.151317900	1
chr1.151370701.151371000	1
chr1.151583101.151583400	5
chr1.151586701.151587000	1
chr1.151587001.151587300	4
chr1.151884301.151884600	23
chr1.152010301.152010600	1
chr1.152486701.152487000	4
chr1.152733901.152734200	2
chr1.15335701.15336000	77
chr1.1536001.1536300	11
chr1.153629701.153630000	1
chr1.153630301.153630600	9
chr1.153633001.153633300	2
chr1.153645301.153645600	1
chr1.153649501.153649800	3
chr1.153652501.153652800	1
chr1.153660601.153660900	2
chr1.153663001.153663300	12
chr1.1536901.1537200	1
chr1.153699901.153700200	1
chr1.153701701.153702000	2
chr1.153704401.153704700	9
chr1.153704701.153705000	1
chr1.15373501.15373800	1
chr1.15375301.15375600	2
chr1.153762301.153762600	19
chr1.153897301.153897600	1
chr1.153914401.153914700	3
chr1.153915001.153915300	16
chr1.153936901.153937200	1
chr1.153938401.153938700	8
chr1.153951901.153952200	4
chr1.153961501.153961800	1
chr1.154157701.154158000	1
chr1.154166101.154166400	21
chr1.154475101.154475400	72
chr1.154475401.154475700	100
chr1.154476001.154476300	1
chr1.154533001.154533300	4
chr1.15481801.15482100	1
chr1.154899901.154900200	2
chr1.154911001.154911300	3
chr1.154987501.154987800	5
chr1.154988101.154988400	1
chr1.154988701.154989000	8
chr1.154989001.154989300	50
chr1.155035501.155035800	95
chr1.155038501.155038800	1
chr1.155098201.155098500	1
chr1.155098501.155098800	4
chr1.155148001.155148300	4
chr1.155237101.155237400	1
chr1.155243701.155244000	2
chr1.155248801.155249100	16
chr1.1552501.1552800	1
chr1.155264701.155265000	44
chr1.155267401.155267700	80
chr1.155276401.155276700	6
chr1.1552801.1553100	8
chr1.155290801.155291100	4
chr1.15540001.15540300	1
chr1.15540301.15540600	1
chr1.155534101.155534400	24
chr1.155578201.155578500	1
chr1.155578801.155579100	3
chr1.155579101.155579400	61
chr1.155655901.155656200	32
chr1.155659501.155659800	24
chr1.1557601.1557900	3
chr1.155919001.155919300	39
chr1.155988301.155988600	1
chr1.155991301.155991600	1
chr1.156046201.156046500	4
chr1.156053401.156053700	5
chr1.156162301.156162600	1
chr1.156162901.156163200	2
chr1.156163201.156163500	1
chr1.156185401.156185700	19
chr1.156213601.156213900	2
chr1.156217801.156218100	3
chr1.156258901.156259200	1
chr1.156261001.156261300	33
chr1.156308701.156309000	2
chr1.156310201.156310500	10
chr1.156338401.156338700	2
chr1.156404701.156405000	3
chr1.156424801.156425100	3
chr1.15649501.15649800	1
chr1.156544501.156544800	1
chr1.156597001.156597300	16
chr1.156612601.156612900	22
chr1.156617101.156617400	1
chr1.156628501.156628800	1
chr1.156629101.156629400	5
chr1.15664201.15664500	1
chr1.156739501.156739800	3
chr1.156813001.156813300	3
chr1.156816301.156816600	2
chr1.156816601.156816900	1
chr1.1568701.1569000	2
chr1.156878101.156878400	1
chr1.156889801.156890100	1
chr1.156898201.156898500	1
chr1.157245901.157246200	15
chr1.157965601.157965900	2
chr1.158082001.158082300	1
chr1.158083801.158084100	1
chr1.15848401.15848700	1
chr1.15912601.15912900	2
chr1.15931201.15931500	4
chr1.15946201.15946500	19
chr1.159652501.159652800	1
chr1.159792901.159793200	10
chr1.159869101.159869400	1
chr1.159897901.159898200	1
chr1.159898201.159898500	22
chr1.159900601.159900900	33
chr1.159999301.159999600	1
chr1.1600501.1600800	1
chr1.160054501.160054800	110
chr1.1600801.1601100	2
chr1.16009501.16009800	3
chr1.16013101.16013400	2
chr1.16013401.16013700	2
chr1.1603201.1603500	1
chr1.160340701.160341000	25
chr1.160377901.160378200	3
chr1.160387501.160387800	3
chr1.160387801.160388100	4
chr1.160388701.160389000	9
chr1.1604401.1604700	19
chr1.16054201.16054500	13
chr1.16055101.16055400	5
chr1.160599301.160599600	2
chr1.1606801.1607100	7
chr1.16073401.16073700	1
chr1.160769701.160770000	2
chr1.160772101.160772400	1
chr1.1608301.1608600	3
chr1.1609801.1610100	2
chr1.161006701.161007000	2
chr1.161007901.161008200	1
chr1.1610101.1610400	2
chr1.161049001.161049300	1
chr1.161085901.161086200	2
chr1.161086501.161086800	2
chr1.161110801.161111100	5
chr1.161111701.161112000	10
chr1.161227501.161227800	9
chr1.16125301.16125600	2
chr1.161348701.161349000	1
chr1.161367001.161367300	1
chr1.161368501.161368800	1
chr1.161408701.161409000	4
chr1.161410801.161411100	16
chr1.161412901.161413200	1
chr1.161418301.161418600	3
chr1.161419801.161420100	14
chr1.161425501.161425800	18
chr1.161439901.161440200	3
chr1.161440801.161441100	1
chr1.161441101.161441400	11
chr1.161442301.161442600	5
chr1.161442601.161442900	2
chr1.161495701.161496000	1
chr1.161574901.161575200	3
chr1.161576101.161576400	3
chr1.161576701.161577000	1
chr1.16164901.16165200	1
chr1.161695501.161695800	20
chr1.161720701.161721000	1
chr1.16172701.16173000	1
chr1.161973301.161973600	7
chr1.161992201.161992500	1
chr1.161992501.161992800	1
chr1.1621801.1622100	1
chr1.1622101.1622400	40
chr1.162337201.162337500	1
chr1.162339001.162339300	1
chr1.162370501.162370800	15
chr1.162370801.162371100	11
chr1.162533101.162533400	1
chr1.162533401.162533700	20
chr1.16270201.16270500	1
chr1.16270501.16270800	29
chr1.16272301.16272600	1
chr1.16303501.16303800	7
chr1.1632001.1632300	1
chr1.1632601.1632900	1
chr1.1634701.1635000	1
chr1.1635001.1635300	1
chr1.16397401.16397700	4
chr1.164291101.164291400	2
chr1.1643101.1643400	1
chr1.1643401.1643700	1
chr1.1645801.1646100	2
chr1.164580901.164581200	5
chr1.16462801.16463100	1
chr1.16465201.16465500	2
chr1.16473001.16473300	5
chr1.16474501.16474800	2
chr1.16475401.16475700	1
chr1.16477201.16477500	10
chr1.16482901.16483200	1
chr1.16492501.16492800	13
chr1.16493701.16494000	94
chr1.165085501.165085800	4
chr1.16532401.16532700	48
chr1.165324601.165324900	7
chr1.16536301.16536600	1
chr1.1654201.1654500	1
chr1.16542301.16542600	1
chr1.16553701.16554000	7
chr1.16554001.16554300	5
chr1.16554301.16554600	21
chr1.16554901.16555200	5
chr1.165597601.165597900	7
chr1.16561501.16561800	1
chr1.16565401.16565700	4
chr1.1657201.1657500	8
chr1.1657801.1658100	1
chr1.16644901.16645200	1
chr1.16676701.16677000	1
chr1.166847101.166847400	1
chr1.16695601.16695900	1
chr1.167135401.167135700	1
chr1.167408701.167409000	5
chr1.167410801.167411100	2
chr1.167442601.167442900	61
chr1.167458801.167459100	1
chr1.167478901.167479200	8
chr1.1675201.1675500	5
chr1.167599501.167599800	5
chr1.167615701.167616000	2
chr1.1678801.1679100	22
chr1.168025201.168025500	1
chr1.16809301.16809600	1
chr1.168145801.168146100	1
chr1.168146101.168146400	16
chr1.168193801.168194100	18
chr1.16823401.16823700	1
chr1.1683901.1684200	3
chr1.16839301.16839600	1
chr1.16847101.16847400	71
chr1.16849501.16849800	1
chr1.16849801.16850100	20
chr1.16860001.16860300	2
chr1.16860301.16860600	2
chr1.16861501.16861800	4
chr1.1686901.1687200	3
chr1.169074001.169074300	2
chr1.1693201.1693500	3
chr1.16938601.16938900	1
chr1.16969201.16969500	3
chr1.16974301.16974600	66
chr1.16974901.16975200	4
chr1.16975801.16976100	1
chr1.16976401.16976700	28
chr1.16983301.16983600	6
chr1.17006401.17006700	2
chr1.17007001.17007300	24
chr1.17017201.17017500	18
chr1.17017801.17018100	20
chr1.17019001.17019300	2
chr1.17019901.17020200	1
chr1.17020201.17020500	1
chr1.17020801.17021100	37
chr1.17025901.17026200	2
chr1.17026801.17027100	8
chr1.17053501.17053800	1
chr1.17065501.17065800	3
chr1.17067901.17068200	3
chr1.17074501.17074800	4
chr1.17075701.17076000	10
chr1.17077501.17077800	4
chr1.17083501.17083800	10
chr1.17085301.17085600	6
chr1.17085901.17086200	2
chr1.17087401.17087700	4
chr1.171640501.171640800	1
chr1.171752701.171753000	3
chr1.17199901.17200200	2
chr1.17200201.17200500	7
chr1.17223601.17223900	4
chr1.17281201.17281500	24
chr1.172888501.172888800	4
chr1.17308501.17308800	5
chr1.17330401.17330700	14
chr1.173640601.173640900	1
chr1.173795101.173795400	3
chr1.17381101.17381400	2
chr1.17475901.17476200	6
chr1.17476801.17477100	1
chr1.17494501.17494800	1
chr1.175568101.175568400	2
chr1.175891201.175891500	1
chr1.17736601.17736900	12
chr1.17746801.17747100	1
chr1.178007701.178008000	4
chr1.178457101.178457400	3
chr1.178513201.178513500	2
chr1.178514101.178514400	2
chr1.17868601.17868900	1
chr1.178993801.178994100	11
chr1.178994101.178994400	46
chr1.179049601.179049900	1
chr1.179145001.179145300	17
chr1.179265301.179265600	1
chr1.179334001.179334300	4
chr1.179336101.179336400	5
chr1.17948101.17948400	1
chr1.17949301.17949600	4
chr1.17949601.17949900	1
chr1.17950201.17950500	3
chr1.17951101.17951400	2
chr1.17951401.17951700	2
chr1.179555701.179556000	2
chr1.179556301.179556600	4
chr1.179559601.179559900	19
chr1.179561701.179562000	17
chr1.17956201.17956500	1
chr1.17962501.17962800	5
chr1.179714101.179714400	4
chr1.179849701.179850000	1
chr1.179922301.179922600	4
chr1.180905401.180905700	2
chr1.181130401.181130700	7
chr1.18152701.18153000	1
chr1.182109301.182109600	1
chr1.1824601.1824900	6
chr1.1824901.1825200	1
chr1.182580601.182580900	1
chr1.182760301.182760600	10
chr1.182807401.182807700	1
chr1.182808001.182808300	1
chr1.182919601.182919900	2
chr1.182990401.182990700	3
chr1.183387301.183387600	5
chr1.183549601.183549900	2
chr1.1841401.1841700	164
chr1.184633801.184634100	2
chr1.184634101.184634400	2
chr1.184725601.184725900	14
chr1.1848001.1848300	2
chr1.184924801.184925100	4
chr1.184940401.184940700	4
chr1.185016901.185017200	1
chr1.1851601.1851900	19
chr1.1851901.1852200	43
chr1.1852201.1852500	44
chr1.1852501.1852800	7
chr1.185508301.185508600	4
chr1.1860601.1860900	1
chr1.1860901.1861200	1
chr1.1861201.1861500	1
chr1.186624001.186624300	1
chr1.186625201.186625500	1
chr1.18690901.18691200	3
chr1.18692101.18692400	27
chr1.1872901.1873200	9
chr1.187600201.187600500	1
chr1.18807301.18807600	2
chr1.18808501.18808800	2
chr1.18809101.18809400	1
chr1.1887901.1888200	6
chr1.1888501.1888800	15
chr1.1888801.1889100	2
chr1.1895101.1895400	16
chr1.18954601.18954900	3
chr1.1896001.1896300	1
chr1.1896301.1896600	26
chr1.1909801.1910100	2
chr1.1913701.1914000	12
chr1.1914301.1914600	1
chr1.19182301.19182600	4
chr1.19204201.19204500	1
chr1.19211401.19211700	2
chr1.192469501.192469800	25
chr1.192583201.192583500	1
chr1.19280101.19280400	4
chr1.19280401.19280700	11
chr1.19285201.19285500	1
chr1.193027201.193027500	1
chr1.193030801.193031100	10
chr1.19336501.19336800	8
chr1.1935601.1935900	2
chr1.19360201.19360500	42
chr1.1936201.1936500	1
chr1.1936501.1936800	1
chr1.1936801.1937100	1
chr1.1949701.1950000	1
chr1.1952701.1953000	14
chr1.19533901.19534200	1
chr1.1956901.1957200	11
chr1.1957201.1957500	6
chr1.1957501.1957800	1
chr1.19579201.19579500	1
chr1.19612801.19613100	1
chr1.19614301.19614600	1
chr1.196379701.196380000	3
chr1.19664101.19664400	68
chr1.19666501.19666800	128
chr1.196845901.196846200	7
chr1.1972801.1973100	21
chr1.1973101.1973400	2
chr1.197890501.197890800	2
chr1.1979401.1979700	8
chr1.198123601.198123900	1
chr1.1983001.1983300	4
chr1.1989301.1989600	8
chr1.1989601.1989900	32
chr1.1990501.1990800	8
chr1.19968301.19968600	2
chr1.19968601.19968900	1
chr1.200005501.200005800	10
chr1.20004601.20004900	8
chr1.20006401.20006700	3
chr1.200116501.200116800	1
chr1.200381101.200381400	4
chr1.200637301.200637600	4
chr1.2006401.2006700	39
chr1.2007301.2007600	23
chr1.200839501.200839800	3
chr1.200841301.200841600	3
chr1.200841601.200841900	1
chr1.200842501.200842800	12
chr1.200843101.200843400	2
chr1.200880601.200880900	1
chr1.200969401.200969700	3
chr1.200970001.200970300	50
chr1.200971201.200971500	2
chr1.201140701.201141000	1
chr1.201160801.201161100	1
chr1.201197101.201197400	19
chr1.20124001.20124300	4
chr1.201367801.201368100	1
chr1.201440401.201440700	6
chr1.201463801.201464100	9
chr1.201611401.201611700	6
chr1.201619201.201619500	4
chr1.202030201.202030500	8
chr1.20208301.20208600	2
chr1.202160701.202161000	20
chr1.202163701.202164000	31
chr1.2028001.2028300	10
chr1.202856401.202856700	5
chr1.202978801.202979100	16
chr1.202996201.202996500	1
chr1.202996501.202996800	2
chr1.203061601.203061900	3
chr1.203061901.203062200	3
chr1.203457601.203457900	2
chr1.203526601.203526900	2
chr1.203541301.203541600	1
chr1.203625001.203625300	1
chr1.203735401.203735700	19
chr1.2037601.2037900	6
chr1.2037901.2038200	2
chr1.203794201.203794500	1
chr1.203832301.203832600	2
chr1.203870101.203870400	1
chr1.2040301.2040600	2
chr1.204040201.204040500	2
chr1.204041701.204042000	1
chr1.2040901.2041200	6
chr1.204122101.204122400	3
chr1.204226201.204226500	17
chr1.204228301.204228600	40
chr1.204381301.204381600	2
chr1.204381901.204382200	8
chr1.2044201.2044500	1
chr1.204486901.204487200	2
chr1.204652201.204652500	18
chr1.2047801.2048100	1
chr1.204975901.204976200	3
chr1.204976201.204976500	1
chr1.205041001.205041300	2
chr1.205238401.205238700	1
chr1.205270201.205270500	5
chr1.205289401.205289700	10
chr1.205312201.205312500	14
chr1.205314901.205315200	1
chr1.205315201.205315500	1
chr1.205498801.205499100	1
chr1.205500301.205500600	2
chr1.205631401.205631700	3
chr1.205631701.205632000	1
chr1.205651501.205651800	1
chr1.20569501.20569800	1
chr1.205721101.205721400	48
chr1.205743601.205743900	17
chr1.205784101.205784400	21
chr1.205819201.205819500	2
chr1.206683201.206683500	2
chr1.206844001.206844300	6
chr1.206844301.206844600	3
chr1.20694301.20694600	14
chr1.206966401.206966700	13
chr1.207064201.207064500	1
chr1.207080101.207080400	4
chr1.207080701.207081000	5
chr1.207081001.207081300	4
chr1.207084001.207084300	1
chr1.207492301.207492600	1
chr1.207818401.207818700	4
chr1.207819001.207819300	1
chr1.207842701.207843000	4
chr1.208040701.208041000	1
chr1.2081701.2082000	5
chr1.20962201.20962500	1
chr1.209799301.209799600	4
chr1.20985301.20985600	6
chr1.20989201.20989500	7
chr1.209919301.209919600	3
chr1.209978101.209978400	2
chr1.209978701.209979000	4
chr1.209979001.209979300	52
chr1.210002101.210002400	23
chr1.210109201.210109500	1
chr1.21021601.21021900	1
chr1.21030901.21031200	8
chr1.21041701.21042000	1
chr1.21045601.21045900	1
chr1.210503401.210503700	1
chr1.21057301.21057600	1
chr1.21061201.21061500	16
chr1.211434901.211435200	3
chr1.2114701.2115000	1
chr1.2115001.2115300	2
chr1.2116501.2116800	3
chr1.211650601.211650900	10
chr1.211652401.211652700	3
chr1.211653001.211653300	1
chr1.211689301.211689600	9
chr1.211689601.211689900	1
chr1.211713001.211713300	1
chr1.2117701.2118000	2
chr1.211849501.211849800	6
chr1.211849801.211850100	2
chr1.2119801.2120100	13
chr1.2122801.2123100	3
chr1.212456101.212456400	1
chr1.212585401.212585700	2
chr1.212605201.212605500	1
chr1.212672101.212672400	10
chr1.212731201.212731500	3
chr1.212964001.212964300	4
chr1.213029101.213029400	2
chr1.213029401.213029700	2
chr1.213030301.213030600	3
chr1.213032401.213032700	8
chr1.213090301.213090600	6
chr1.213124801.213125100	23
chr1.213126001.213126300	1
chr1.213152701.213153000	8
chr1.213224101.213224400	4
chr1.21401701.21402000	1
chr1.2142001.2142300	2
chr1.2143801.2144100	4
chr1.214452601.214452900	1
chr1.214726201.214726500	4
chr1.214726501.214726800	3
chr1.215043601.215043900	1
chr1.215044801.215045100	5
chr1.21550501.21550800	2
chr1.21550801.21551100	12
chr1.21615901.21616200	9
chr1.2161801.2162100	4
chr1.2162701.2163000	7
chr1.21655501.21655800	12
chr1.21670501.21670800	3
chr1.21672601.21672900	26
chr1.21672901.21673200	116
chr1.217260901.217261200	1
chr1.21760801.21761100	1
chr1.21762601.21762900	1
chr1.21762901.21763200	3
chr1.21765601.21765900	11
chr1.21788401.21788700	2
chr1.21894901.21895200	3
chr1.21930601.21930900	46
chr1.21931201.21931500	1
chr1.21948301.21948600	21
chr1.219632401.219632700	1
chr1.21975901.21976200	14
chr1.21977401.21977700	2
chr1.219786301.219786600	21
chr1.21978901.21979200	4
chr1.21985501.21985800	1
chr1.220221001.220221300	9
chr1.220265401.220265700	4
chr1.220394101.220394400	28
chr1.220510501.220510800	7
chr1.221050801.221051100	7
chr1.221057701.221058000	1
chr1.221060401.221060700	1
chr1.221063101.221063400	21
chr1.22106401.22106700	19
chr1.221069101.221069400	4
chr1.22111501.22111800	7
chr1.22112101.22112400	1
chr1.22141501.22141800	1
chr1.2214301.2214600	6
chr1.22149601.22149900	1
chr1.22155601.22155900	8
chr1.22189201.22189500	6
chr1.22189501.22189800	1
chr1.22191001.22191300	1
chr1.221927701.221928000	1
chr1.2220001.2220300	2
chr1.222461701.222462000	2
chr1.222819601.222819900	3
chr1.223252801.223253100	11
chr1.2232601.2232900	5
chr1.223315801.223316100	1
chr1.223356601.223356900	1
chr1.223568101.223568400	11
chr1.2237101.2237400	1
chr1.2237401.2237700	1
chr1.223742701.223743000	3
chr1.22380601.22380900	4
chr1.2239201.2239500	1
chr1.224031001.224031300	1
chr1.224034901.224035200	4
chr1.2240701.2241000	31
chr1.224182201.224182500	5
chr1.224369101.224369400	1
chr1.2244301.2244600	1
chr1.224518801.224519100	2
chr1.22455601.22455900	1
chr1.224719501.224719800	3
chr1.2247301.2247600	1
chr1.2247901.2248200	9
chr1.224804101.224804400	7
chr1.224925001.224925300	1
chr1.2250301.2250600	1
chr1.2256601.2256900	1
chr1.225660901.225661200	23
chr1.225661201.225661500	1
chr1.225663301.225663600	1
chr1.225865201.225865500	4
chr1.226072201.226072500	8
chr1.226074601.226074900	2
chr1.226076101.226076400	5
chr1.226109701.226110000	16
chr1.226110301.226110600	3
chr1.226113601.226113900	6
chr1.226188601.226188900	2
chr1.226251901.226252200	3
chr1.226269601.226269900	1
chr1.226269901.226270200	3
chr1.226315201.226315500	4
chr1.226366201.226366500	3
chr1.226376701.226377000	7
chr1.226409401.226409700	1
chr1.226412101.226412400	1
chr1.226412401.226412700	3
chr1.2265901.2266200	21
chr1.226830901.226831200	53
chr1.226889101.226889400	5
chr1.226889401.226889700	2
chr1.226891501.226891800	1
chr1.22692001.22692300	13
chr1.226924201.226924500	3
chr1.226924501.226924800	1
chr1.227161801.227162100	2
chr1.227162701.227163000	2
chr1.227164501.227164800	6
chr1.227315701.227316000	1
chr1.227681101.227681400	2
chr1.227681701.227682000	14
chr1.227682601.227682900	8
chr1.227696401.227696700	2
chr1.227729701.227730000	5
chr1.227748301.227748600	16
chr1.227753401.227753700	1
chr1.22777201.22777500	4
chr1.227915701.227916000	2
chr1.227920501.227920800	2
chr1.227920801.227921100	22
chr1.227974201.227974500	21
chr1.228003601.228003900	16
chr1.228075301.228075600	28
chr1.228077701.228078000	16
chr1.228110701.228111000	14
chr1.228133801.228134100	9
chr1.228160801.228161100	1
chr1.228274201.228274500	8
chr1.228288301.228288600	4
chr1.22829101.22829400	24
chr1.228294601.228294900	1
chr1.228329701.228330000	4
chr1.228351601.228351900	1
chr1.228361201.228361500	5
chr1.228405901.228406200	2
chr1.228459601.228459900	3
chr1.228461401.228461700	3
chr1.228461701.228462000	26
chr1.228464401.228464700	1
chr1.228464701.228465000	1
chr1.228466201.228466500	2
chr1.228466501.228466800	16
chr1.228469801.228470100	1
chr1.228474001.228474300	1
chr1.228474901.228475200	1
chr1.228475201.228475500	14
chr1.228507601.228507900	5
chr1.228550201.228550500	3
chr1.228557401.228557700	4
chr1.228558001.228558300	1
chr1.228582601.228582900	7
chr1.228615001.228615300	1
chr1.228634201.228634500	1
chr1.228635401.228635700	48
chr1.228742501.228742800	1
chr1.228747901.228748200	1
chr1.228752701.228753000	2
chr1.228759601.228759900	1
chr1.228778501.228778800	1
chr1.228869401.228869700	2
chr1.22888201.22888500	4
chr1.228921601.228921900	2
chr1.22918801.22919100	1
chr1.22920301.22920600	24
chr1.22925401.22925700	5
chr1.22926601.22926900	1
chr1.22926901.22927200	5
chr1.22928401.22928700	5
chr1.229296901.229297200	1
chr1.229695601.229695900	1
chr1.229730101.229730400	1
chr1.22973701.22974000	2
chr1.229759201.229759500	9
chr1.23002501.23002800	1
chr1.2302201.2302500	54
chr1.230241301.230241600	69
chr1.230259001.230259300	5
chr1.2303101.2303400	3
chr1.2303401.2303700	1
chr1.2303701.2304000	1
chr1.23040301.23040600	1
chr1.230407501.230407800	1
chr1.230414701.230415000	1
chr1.230415601.230415900	1
chr1.2304301.2304600	2
chr1.230463901.230464200	1
chr1.230467801.230468100	1
chr1.230492401.230492700	1
chr1.230493301.230493600	6
chr1.230776501.230776800	15
chr1.231006001.231006300	4
chr1.231006301.231006600	1
chr1.231173101.231173400	4
chr1.231378901.231379200	1
chr1.2314501.2314800	4
chr1.231474901.231475200	9
chr1.231531901.231532200	3
chr1.231666001.231666300	47
chr1.231666301.231666600	5
chr1.231869401.231869700	2
chr1.2318701.2319000	3
chr1.232352701.232353000	2
chr1.232356301.232356600	15
chr1.2324401.2324700	13
chr1.23278201.23278500	12
chr1.233121601.233121900	1
chr1.2332501.2332800	1
chr1.23344201.23344500	1
chr1.233464801.233465100	4
chr1.23348101.23348400	5
chr1.2337601.2337900	1
chr1.2338201.2338500	1
chr1.2340301.2340600	26
chr1.2343001.2343300	6
chr1.234548701.234549000	9
chr1.234559201.234559500	4
chr1.234625801.234626100	1
chr1.234669001.234669300	1
chr1.234680401.234680700	4
chr1.234881401.234881700	2
chr1.23503201.23503500	13
chr1.235152001.235152300	1
chr1.235183801.235184100	1
chr1.235267201.235267500	1
chr1.235322401.235322700	4
chr1.23541301.23541600	3
chr1.235804801.235805100	1
chr1.235805401.235805700	110
chr1.235807201.235807500	1
chr1.235815301.235815600	2
chr1.235836601.235836900	3
chr1.235836901.235837200	2
chr1.2358901.2359200	1
chr1.2360101.2360400	2
chr1.2360701.2361000	6
chr1.236155501.236155800	35
chr1.236156401.236156700	5
chr1.236156701.236157000	2
chr1.236157001.236157300	1
chr1.236307601.236307900	2
chr1.236447101.236447400	1
chr1.23673001.23673300	1
chr1.236848801.236849100	13
chr1.236856901.236857200	1
chr1.2369701.2370000	1
chr1.238106401.238106700	3
chr1.238106701.238107000	28
chr1.2381101.2381400	16
chr1.2386501.2386800	2
chr1.2386801.2387100	2
chr1.2387101.2387400	1
chr1.2388301.2388600	2
chr1.2397901.2398200	6
chr1.2400601.2400900	6
chr1.24016501.24016800	4
chr1.240308101.240308400	1
chr1.240371101.240371400	15
chr1.240568501.240568800	9
chr1.240569101.240569400	24
chr1.240569701.240570000	1
chr1.240656101.240656400	1
chr1.24072601.24072900	1
chr1.240874501.240874800	2
chr1.2409301.2409600	2
chr1.240986401.240986700	2
chr1.2409901.2410200	1
chr1.24107101.24107400	1
chr1.24116401.24116700	1
chr1.24124801.24125100	1
chr1.2414701.2415000	1
chr1.2415901.2416200	1
chr1.241696201.241696500	1
chr1.242013301.242013600	2
chr1.24228001.24228300	1
chr1.24228301.24228600	1
chr1.242609701.242610000	6
chr1.242686801.242687100	26
chr1.243052801.243053100	1
chr1.24307801.24308100	1
chr1.243264901.243265200	1
chr1.243265501.243265800	1
chr1.2433601.2433900	1
chr1.243487201.243487500	1
chr1.2436301.2436600	2
chr1.243647101.243647400	3
chr1.243647401.243647700	1
chr1.243649801.243650100	22
chr1.243652201.243652500	16
chr1.243653401.243653700	1
chr1.2437201.2437500	19
chr1.2437501.2437800	1
chr1.244217701.244218000	1
chr1.244439401.244439700	2
chr1.244467601.244467900	8
chr1.244534801.244535100	35
chr1.244617301.244617600	11
chr1.2446201.2446500	1
chr1.244625101.244625400	3
chr1.2447401.2447700	1
chr1.2448601.2448900	1
chr1.244894201.244894500	1
chr1.24512701.24513000	1
chr1.245217601.245217900	1
chr1.245315401.245315700	31
chr1.245320801.245321100	2
chr1.2454601.2454900	1
chr1.245496601.245496900	18
chr1.245499901.245500200	15
chr1.245544001.245544300	4
chr1.245739301.245739600	44
chr1.245740801.245741100	1
chr1.245752501.245752800	6
chr1.245754601.245754900	2
chr1.245835601.245835900	35
chr1.245846401.245846700	15
chr1.245848201.245848500	2
chr1.245848801.245849100	4
chr1.245850601.245850900	1
chr1.245851201.245851500	1
chr1.2459101.2459400	58
chr1.246060901.246061200	2
chr1.246137701.246138000	4
chr1.246138301.246138600	1
chr1.246139201.246139500	1
chr1.246139801.246140100	1
chr1.246592201.246592500	1
chr1.2466301.2466600	1
chr1.246728401.246728700	1
chr1.2468101.2468400	1
chr1.246950401.246950700	3
chr1.246951601.246951900	5
chr1.246952201.246952500	1
chr1.247092601.247092900	1
chr1.247169701.247170000	3
chr1.247170301.247170600	3
chr1.2472601.2472900	43
chr1.247266601.247266900	4
chr1.24741601.24741900	3
chr1.247465801.247466100	2
chr1.247492201.247492500	10
chr1.247496101.247496400	7
chr1.247497601.247497900	2
chr1.247615201.247615500	8
chr1.247615801.247616100	1
chr1.247620301.247620600	1
chr1.247694401.247694700	1
chr1.247695001.247695300	1
chr1.248100601.248100900	3
chr1.24861001.24861300	1
chr1.24861601.24861900	1
chr1.248855401.248855700	3
chr1.249104401.249104700	1
chr1.249105601.249105900	1
chr1.249106801.249107100	49
chr1.249133801.249134100	1
chr1.249139801.249140100	3
chr1.24967801.24968100	2
chr1.25069501.25069800	16
chr1.25070701.25071000	106
chr1.25073401.25073700	1
chr1.2515201.2515500	6
chr1.2520001.2520300	1
chr1.2520301.2520600	1
chr1.25227001.25227300	1
chr1.25228501.25228800	1
chr1.25230601.25230900	4
chr1.25236601.25236900	2
chr1.2525101.2525400	1
chr1.25254001.25254300	14
chr1.25260001.25260300	2
chr1.2526601.2526900	1
chr1.2526901.2527200	1
chr1.25273501.25273800	79
chr1.2527501.2527800	11
chr1.2528701.2529000	8
chr1.25353001.25353300	1
chr1.25357801.25358100	1
chr1.2539801.2540100	1
chr1.25560901.25561200	3
chr1.25564501.25564800	61
chr1.2561101.2561400	7
chr1.25869001.25869300	16
chr1.25944901.25945200	1
chr1.26098201.26098500	45
chr1.26098501.26098800	2
chr1.26099401.26099700	2
chr1.26200201.26200500	1
chr1.26202601.26202900	1
chr1.26204101.26204400	7
chr1.26247001.26247300	3
chr1.26247901.26248200	11
chr1.26322601.26322900	5
chr1.26360101.26360400	12
chr1.26435101.26435400	2
chr1.26440801.26441100	1
chr1.26490301.26490600	2
chr1.26490901.26491200	2
chr1.26491201.26491500	37
chr1.26497501.26497800	3
chr1.26497801.26498100	1
chr1.26498101.26498400	15
chr1.26498401.26498700	3
chr1.26551201.26551500	5
chr1.26551501.26551800	3
chr1.26553301.26553600	3
chr1.26634301.26634600	1
chr1.26685901.26686200	4
chr1.26826001.26826300	1
chr1.26828401.26828700	1
chr1.26907301.26907600	3
chr1.27001.27300	1
chr1.27142501.27142800	9
chr1.27144601.27144900	20
chr1.27145801.27146100	1
chr1.27152401.27152700	5
chr1.2715601.2715900	3
chr1.2715901.2716200	39
chr1.27189301.27189600	1
chr1.27214501.27214800	1
chr1.27218101.27218400	2
chr1.27219001.27219300	1
chr1.27227701.27228000	1
chr1.27321901.27322200	35
chr1.27332401.27332700	1
chr1.27332701.27333000	1
chr1.27333001.27333300	9
chr1.27339601.27339900	4
chr1.27339901.27340200	12
chr1.27353701.27354000	9
chr1.27480601.27480900	14
chr1.27482401.27482700	9
chr1.27675601.27675900	2
chr1.27676201.27676500	12
chr1.27676501.27676800	31
chr1.27678901.27679200	1
chr1.27679801.27680100	3
chr1.27683701.27684000	43
chr1.27685501.27685800	82
chr1.27687001.27687300	7
chr1.27687901.27688200	1
chr1.27689701.27690000	1
chr1.27690901.27691200	2
chr1.2770201.2770500	2
chr1.27708001.27708300	2
chr1.27720001.27720300	3
chr1.2777101.2777400	2
chr1.2778901.2779200	2
chr1.27818101.27818400	1
chr1.27855901.27856200	3
chr1.27893701.27894000	4
chr1.27896101.27896400	16
chr1.27896701.27897000	1
chr1.27899401.27899700	2
chr1.27941701.27942000	1
chr1.27962701.27963000	2
chr1.27963001.27963300	1
chr1.28050301.28050600	3
chr1.28050901.28051200	1
chr1.28054201.28054500	9
chr1.28197301.28197600	46
chr1.28239601.28239900	22
chr1.28243201.28243500	1
chr1.2827201.2827500	17
chr1.28284901.28285200	87
chr1.2845801.2846100	1
chr1.28461901.28462200	1
chr1.28481401.28481700	1
chr1.2848501.2848800	3
chr1.28495501.28495800	24
chr1.28571701.28572000	2
chr1.28572301.28572600	6
chr1.28583701.28584000	1
chr1.28584001.28584300	52
chr1.28641601.28641900	33
chr1.28654801.28655100	10
chr1.28656601.28656900	5
chr1.28694701.28695000	2
chr1.2876701.2877000	1
chr1.28842601.28842900	1
chr1.2884501.2884800	9
chr1.2885101.2885400	1
chr1.2886301.2886600	9
chr1.2886601.2886900	17
chr1.28880701.28881000	30
chr1.2888401.2888700	16
chr1.28917301.28917600	1
chr1.28920601.28920900	30
chr1.29061901.29062200	1
chr1.29062501.29062800	4
chr1.29102701.29103000	3
chr1.29139901.29140200	5
chr1.2916901.2917200	4
chr1.2917801.2918100	1
chr1.29188801.29189100	1
chr1.29189101.29189400	67
chr1.29190301.29190600	9
chr1.2919301.2919600	24
chr1.2927701.2928000	1
chr1.2929501.2929800	4
chr1.2929801.2930100	3
chr1.2930701.2931000	5
chr1.2931001.2931300	7
chr1.2936401.2936700	3
chr1.29447401.29447700	21
chr1.29451601.29451900	39
chr1.29460301.29460600	5
chr1.29460901.29461200	2
chr1.29462401.29462700	1
chr1.29583601.29583900	76
chr1.2980801.2981100	1
chr1.2983801.2984100	2
chr1.2989501.2989800	4
chr1.2991601.2991900	1
chr1.2997301.2997600	1
chr1.2998501.2998800	1
chr1.2998801.2999100	3
chr1.2999401.2999700	1
chr1.3001801.3002100	1
chr1.3026401.3026700	1
chr1.3036301.3036600	1
chr1.3038401.3038700	3
chr1.3038701.3039000	4
chr1.3055201.3055500	1
chr1.3055501.3055800	1
chr1.3055801.3056100	9
chr1.30582601.30582900	19
chr1.3059701.3060000	3
chr1.3070501.3070800	9
chr1.3071701.3072000	2
chr1.3073801.3074100	1
chr1.3101101.3101400	7
chr1.3106201.3106500	3
chr1.3107101.3107400	14
chr1.3111901.3112200	14
chr1.31193701.31194000	30
chr1.31194601.31194900	1
chr1.31222201.31222500	1
chr1.31232701.31233000	1
chr1.31247701.31248000	10
chr1.31279501.31279800	2
chr1.3146401.3146700	3
chr1.3147001.3147300	1
chr1.3148501.3148800	25
chr1.3149401.3149700	6
chr1.3153901.3154200	1
chr1.31540501.31540800	12
chr1.3157501.3157800	1
chr1.3159001.3159300	21
chr1.3159301.3159600	4
chr1.31626901.31627200	1
chr1.31629001.31629300	1
chr1.31629601.31629900	2
chr1.3180901.3181200	45
chr1.3186301.3186600	6
chr1.31884001.31884300	4
chr1.31887001.31887300	5
chr1.31904401.31904700	57
chr1.31904701.31905000	1
chr1.3194101.3194400	3
chr1.31947601.31947900	9
chr1.3195901.3196200	19
chr1.32050801.32051100	2
chr1.32052301.32052600	1
chr1.32171101.32171400	32
chr1.32207401.32207700	80
chr1.32209201.32209500	1
chr1.32250601.32250900	8
chr1.3229501.3229800	22
chr1.3238201.3238500	1
chr1.3239101.3239400	8
chr1.3240001.3240300	9
chr1.32477401.32477700	2
chr1.32481301.32481600	1
chr1.32537101.32537400	4
chr1.32574601.32574900	1
chr1.32576101.32576400	23
chr1.32688901.32689200	46
chr1.3269101.3269400	8
chr1.32709001.32709300	1
chr1.32714701.32715000	1
chr1.32759101.32759400	1
chr1.32759701.32760000	1
chr1.32815201.32815500	1
chr1.32816101.32816400	1
chr1.32857801.32858100	3
chr1.3290401.3290700	14
chr1.32928601.32928900	1
chr1.32931601.32931900	5
chr1.3297001.3297300	11
chr1.3304801.3305100	1
chr1.3307201.3307500	2
chr1.3309901.3310200	58
chr1.3310201.3310500	14
chr1.3310501.3310800	71
chr1.3311701.3312000	1
chr1.3319801.3320100	1
chr1.33218701.33219000	2
chr1.33219901.33220200	4
chr1.3326101.3326400	1
chr1.3327301.3327600	2
chr1.3329401.3329700	11
chr1.3332101.3332400	2
chr1.3332701.3333000	3
chr1.33350101.33350400	20
chr1.33353101.33353400	1
chr1.33367501.33367800	9
chr1.3339901.3340200	65
chr1.3341401.3341700	2
chr1.33429301.33429600	1
chr1.33439801.33440100	4
chr1.33440101.33440400	1
chr1.3349501.3349800	1
chr1.33516901.33517200	21
chr1.33517201.33517500	7
chr1.33525901.33526200	15
chr1.3353401.3353700	1
chr1.33612901.33613200	2
chr1.33622501.33622800	2
chr1.33625501.33625800	12
chr1.33626401.33626700	1
chr1.33720001.33720300	14
chr1.3372901.3373200	1
chr1.33770101.33770400	6
chr1.33772501.33772800	1
chr1.33772801.33773100	14
chr1.33897901.33898200	1
chr1.3394201.3394500	18
chr1.3394801.3395100	2
chr1.34091401.34091700	9
chr1.34092001.34092300	1
chr1.3421501.3421800	11
chr1.3434401.3434700	23
chr1.3435901.3436200	42
chr1.3438001.3438300	1
chr1.34628101.34628400	8
chr1.3499201.3499500	4
chr1.3501301.3501600	83
chr1.3513001.3513300	1
chr1.3525601.3525900	15
chr1.3525901.3526200	1
chr1.35260501.35260800	28
chr1.35334601.35334900	1
chr1.35335201.35335500	2
chr1.35440201.35440500	1
chr1.35442601.35442900	1
chr1.3555901.3556200	16
chr1.3556201.3556500	2
chr1.3558301.3558600	2
chr1.3564901.3565200	8
chr1.3570901.3571200	3
chr1.35735701.35736000	3
chr1.36038701.36039000	107
chr1.36039001.36039300	3
chr1.36040501.36040800	4
chr1.36042301.36042600	1
chr1.3607501.3607800	52
chr1.36107401.36107700	6
chr1.36108601.36108900	51
chr1.36108901.36109200	6
chr1.36172501.36172800	11
chr1.3621301.3621600	1
chr1.3621601.3621900	3
chr1.3624001.3624300	2
chr1.3625501.3625800	3
chr1.3648301.3648600	1
chr1.36591301.36591600	48
chr1.36592501.36592800	1
chr1.36613801.36614100	2
chr1.3661801.3662100	5
chr1.36642001.36642300	1
chr1.36774001.36774300	1
chr1.36787201.36787500	91
chr1.36787801.36788100	83
chr1.36790801.36791100	14
chr1.36805501.36805800	2
chr1.36806701.36807000	2
chr1.36807001.36807300	9
chr1.36807301.36807600	3
chr1.36814501.36814800	106
chr1.36861601.36861900	1
chr1.3691501.3691800	19
chr1.36952801.36953100	1
chr1.3714301.3714600	2
chr1.3714901.3715200	1
chr1.3733801.3734100	2
chr1.3772501.3772800	3
chr1.3772801.3773100	1
chr1.37783201.37783500	1
chr1.37784101.37784400	1
chr1.37784401.37784700	5
chr1.37785001.37785300	51
chr1.37941001.37941300	1
chr1.37981801.37982100	2
chr1.38010301.38010600	7
chr1.38021101.38021400	11
chr1.38022301.38022600	1
chr1.38022601.38022900	90
chr1.38024701.38025000	1
chr1.38060101.38060400	5
chr1.38102401.38102700	1
chr1.38102701.38103000	2
chr1.38134201.38134500	2
chr1.38159701.38160000	5
chr1.38216401.38216700	1
chr1.3823201.3823500	43
chr1.3826201.3826500	2
chr1.38272801.38273100	1
chr1.38327101.38327400	1
chr1.38456101.38456400	1
chr1.38456701.38457000	9
chr1.38461801.38462100	11
chr1.38476801.38477100	8
chr1.38508301.38508600	3
chr1.38513401.38513700	1
chr1.38514301.38514600	15
chr1.38573701.38574000	5
chr1.39045601.39045900	3
chr1.39174601.39174900	1
chr1.39282301.39282600	1
chr1.39455101.39455400	5
chr1.39546301.39546600	2
chr1.39955501.39955800	1
chr1.39955801.39956100	3
chr1.39958501.39958800	1
chr1.39978601.39978900	14
chr1.39981901.39982200	2
chr1.39982201.39982500	4
chr1.40151701.40152000	2
chr1.40238401.40238700	2
chr1.40255501.40255800	3
chr1.40331401.40331700	15
chr1.40346701.40347000	3
chr1.40350301.40350600	1
chr1.40350601.40350900	1
chr1.40350901.40351200	1
chr1.40369201.40369500	1
chr1.40596901.40597200	1
chr1.40600501.40600800	18
chr1.40601101.40601400	1
chr1.40626001.40626300	1
chr1.40724401.40724700	1
chr1.40767001.40767300	9
chr1.40770901.40771200	8
chr1.40779001.40779300	2
chr1.4079101.4079400	14
chr1.40972201.40972500	18
chr1.40975201.40975500	1
chr1.40976401.40976700	1
chr1.40995901.40996200	5
chr1.41116801.41117100	7
chr1.41155201.41155500	3
chr1.41281801.41282100	4
chr1.41303401.41303700	4
chr1.41325901.41326200	7
chr1.41348401.41348700	2
chr1.41350501.41350800	1
chr1.41825701.41826000	6
chr1.41889601.41889900	4
chr1.4191001.4191300	1
chr1.41982601.41982900	1
chr1.42502501.42502800	1
chr1.42611701.42612000	1
chr1.42802201.42802500	10
chr1.42844801.42845100	1
chr1.42845101.42845400	1
chr1.42923401.42923700	20
chr1.42927601.42927900	92
chr1.43126201.43126500	1
chr1.43203601.43203900	4
chr1.43203901.43204200	2
chr1.43204201.43204500	17
chr1.43205701.43206000	5
chr1.43206001.43206300	72
chr1.4327801.4328100	8
chr1.43402201.43402500	1
chr1.43402501.43402800	1
chr1.43405501.43405800	104
chr1.43422601.43422900	1
chr1.43426501.43426800	2
chr1.43471501.43471800	1
chr1.43473601.43473900	5
chr1.43531801.43532100	1
chr1.43532401.43532700	6
chr1.43535101.43535400	10
chr1.43615501.43615800	1
chr1.43736401.43736700	9
chr1.43737301.43737600	1
chr1.43737901.43738200	5
chr1.43770301.43770600	1
chr1.43770901.43771200	11
chr1.43815301.43815600	9
chr1.43823101.43823400	1
chr1.43823701.43824000	42
chr1.43825501.43825800	11
chr1.43826701.43827000	1
chr1.43835401.43835700	2
chr1.43857901.43858200	1
chr1.43997701.43998000	1
chr1.43998301.43998600	1
chr1.44030701.44031000	4
chr1.44031301.44031600	65
chr1.44054701.44055000	1
chr1.44055301.44055600	2
chr1.44057401.44057700	1
chr1.44061601.44061900	5
chr1.44069401.44069700	8
chr1.44070301.44070600	9
chr1.44072701.44073000	1
chr1.44114701.44115000	1
chr1.44380801.44381100	14
chr1.44397001.44397300	2
chr1.44401201.44401500	10
chr1.44430901.44431200	4
chr1.44436901.44437200	2
chr1.44494201.44494500	11
chr1.44494501.44494800	1
chr1.44821801.44822100	15
chr1.44869801.44870100	1
chr1.449101.449400	2
chr1.449401.449700	76
chr1.449701.450000	9
chr1.450601.450900	44
chr1.45082501.45082800	1
chr1.45099301.45099600	12
chr1.45188401.45188700	3
chr1.45189601.45189900	5
chr1.45189901.45190200	21
chr1.45195001.45195300	1
chr1.45247801.45248100	37
chr1.45248701.45249000	5
chr1.45263401.45263700	13
chr1.45269701.45270000	1
chr1.45270301.45270600	6
chr1.45271801.45272100	1
chr1.45278401.45278700	1
chr1.45279001.45279300	1
chr1.45279901.45280200	5
chr1.45287101.45287400	2
chr1.45450301.45450600	5
chr1.45450901.45451200	1
chr1.45453301.45453600	3
chr1.45453601.45453900	1
chr1.45474001.45474300	3
chr1.45768601.45768900	2
chr1.45804901.45805200	3
chr1.45963601.45963900	1
chr1.45990601.45990900	2
chr1.46048801.46049100	1
chr1.46088701.46089000	92
chr1.46090501.46090800	1
chr1.46091101.46091400	2
chr1.46215001.46215300	14
chr1.46631401.46631700	1
chr1.46706101.46706400	63
chr1.46706401.46706700	13
chr1.46707301.46707600	1
chr1.46707901.46708200	18
chr1.46806001.46806300	10
chr1.46857901.46858200	13
chr1.46858201.46858500	2
chr1.46860901.46861200	6
chr1.46934101.46934400	3
chr1.4707601.4707900	2
chr1.47080501.47080800	4
chr1.4713001.4713300	1
chr1.4726501.4726800	9
chr1.4726801.4727100	92
chr1.47488501.47488800	13
chr1.47489101.47489400	2
chr1.47694301.47694600	22
chr1.47694601.47694900	3
chr1.4770601.4770900	7
chr1.47798701.47799000	1
chr1.47898901.47899200	2
chr1.47899201.47899500	1
chr1.47899501.47899800	10
chr1.48000601.48000900	1
chr1.48057901.48058200	1
chr1.48058201.48058500	47
chr1.48058801.48059100	17
chr1.48224401.48224700	8
chr1.4830601.4830900	5
chr1.4833301.4833600	1
chr1.4833601.4833900	1
chr1.4834501.4834800	1
chr1.48539701.48540000	2
chr1.5033101.5033400	3
chr1.50489101.50489400	8
chr1.50881201.50881500	21
chr1.51699901.51700200	8
chr1.51810001.51810300	8
chr1.52197001.52197300	12
chr1.52455301.52455600	1
chr1.52455601.52455900	1
chr1.52508101.52508400	2
chr1.53068801.53069100	1
chr1.53163301.53163600	1
chr1.53163601.53163900	1
chr1.53311201.53311500	16
chr1.53386501.53386800	59
chr1.53386801.53387100	3
chr1.53392201.53392500	8
chr1.534901.535200	1
chr1.53528401.53528700	59
chr1.53529301.53529600	1
chr1.53541901.53542200	1
chr1.53542801.53543100	6
chr1.53544601.53544900	6
chr1.53546101.53546400	1
chr1.53558701.53559000	6
chr1.53589301.53589600	2
chr1.53702701.53703000	1
chr1.53703001.53703300	2
chr1.53740501.53740800	1
chr1.53742001.53742300	99
chr1.53903701.53904000	2
chr1.53904001.53904300	5
chr1.53925301.53925600	1
chr1.54127201.54127500	1
chr1.54144901.54145200	1
chr1.54205801.54206100	23
chr1.543601.543900	1
chr1.54585301.54585600	5
chr1.546601.546900	1
chr1.54724501.54724800	6
chr1.54725101.54725400	57
chr1.54726001.54726300	1
chr1.54765001.54765300	1
chr1.547801.548100	4
chr1.54807901.54808200	1
chr1.54822001.54822300	2
chr1.54856501.54856800	1
chr1.54925201.54925500	1
chr1.54965701.54966000	10
chr1.54966301.54966600	2
chr1.55007101.55007400	1
chr1.55180501.55180800	1
chr1.55247101.55247400	10
chr1.55247701.55248000	1
chr1.55268101.55268400	3
chr1.55272001.55272300	5
chr1.55447201.55447500	3
chr1.55461001.55461300	4
chr1.55840501.55840800	1
chr1.5771101.5771400	1
chr1.5772301.5772600	1
chr1.57892501.57892800	2
chr1.58716001.58716300	2
chr1.58716301.58716600	2
chr1.59010601.59010900	6
chr1.59043001.59043300	23
chr1.59368501.59368800	2
chr1.59370901.59371200	1
chr1.5938201.5938500	1
chr1.6034801.6035100	9
chr1.6112501.6112800	3
chr1.6131401.6131700	6
chr1.61517701.61518000	4
chr1.61649701.61650000	22
chr1.6186001.6186300	40
chr1.6186301.6186600	2
chr1.6186601.6186900	14
chr1.6186901.6187200	10
chr1.6187201.6187500	2
chr1.6188701.6189000	12
chr1.6189001.6189300	2
chr1.6201601.6201900	26
chr1.62056801.62057100	5
chr1.6208801.6209100	70
chr1.6209701.6210000	1
chr1.6210001.6210300	1
chr1.62121901.62122200	1
chr1.62189701.62190000	6
chr1.6242401.6242700	1
chr1.6243001.6243300	2
chr1.62662801.62663100	14
chr1.6270001.6270300	6
chr1.6270301.6270600	1
chr1.6270901.6271200	2
chr1.62725801.62726100	3
chr1.62751901.62752200	1
chr1.62783701.62784000	1
chr1.62785801.62786100	52
chr1.62901001.62901300	3
chr1.6294601.6294900	9
chr1.6297001.6297300	6
chr1.6307801.6308100	1
chr1.6312001.6312300	1
chr1.6312901.6313200	4
chr1.6315601.6315900	3
chr1.6318301.6318600	1
chr1.6338401.6338700	3
chr1.6338701.6339000	1
chr1.6354001.6354300	2
chr1.6359701.6360000	6
chr1.6362401.6362700	4
chr1.63786901.63787200	1
chr1.63834001.63834300	1
chr1.64060201.64060500	6
chr1.6454801.6455100	13
chr1.6455101.6455400	3
chr1.64937401.64937700	7
chr1.6511801.6512100	1
chr1.6515101.6515400	2
chr1.6515401.6515700	3
chr1.6520501.6520800	5
chr1.6521401.6521700	2
chr1.6528001.6528300	1
chr1.65292601.65292900	1
chr1.6531001.6531300	1
chr1.6532501.6532800	5
chr1.6533101.6533400	73
chr1.6549001.6549300	4
chr1.6552001.6552300	1
chr1.65718901.65719200	4
chr1.65733001.65733300	1
chr1.66257701.66258000	16
chr1.6654001.6654300	1
chr1.6654601.6654900	1
chr1.6658801.6659100	6
chr1.6665101.6665400	3
chr1.6672301.6672600	14
chr1.6677401.6677700	1
chr1.6683101.6683400	4
chr1.6683401.6683700	1
chr1.6687301.6687600	7
chr1.6709201.6709500	1
chr1.67460701.67461000	2
chr1.67598101.67598400	48
chr1.6760201.6760500	1
chr1.6760501.6760800	8
chr1.6764101.6764400	4
chr1.6842701.6843000	1
chr1.68510401.68510700	2
chr1.68515801.68516100	1
chr1.68960701.68961000	4
chr1.70806601.70806900	2
chr1.70822201.70822500	1
chr1.7121401.7121700	3
chr1.7122001.7122300	1
chr1.7123501.7123800	1
chr1.71400001.71400300	1
chr1.71510101.71510400	3
chr1.715501.715800	3
chr1.7558201.7558500	1
chr1.7722601.7722900	41
chr1.7725301.7725600	2
chr1.7743001.7743300	40
chr1.78350401.78350700	1
chr1.7844401.7844700	2
chr1.78511201.78511500	3
chr1.787501.787800	2
chr1.7886101.7886400	1
chr1.789601.789900	3
chr1.789901.790200	1
chr1.790201.790500	2
chr1.790501.790800	4
chr1.79215901.79216200	1
chr1.79472401.79472700	3
chr1.8011801.8012100	1
chr1.8015401.8015700	2
chr1.801901.802200	23
[truncated: 21,493 more rows]

## Sheet: 10_6_PDAC
DMR	N_of_occurrence
chr1.10001401.10001700	12
chr1.1002001.1002300	7
chr1.10058701.10059000	12
chr1.10091701.10092000	319
chr1.10092001.10092300	1
chr1.10092301.10092600	3
chr1.1009801.1010100	1
chr1.1011001.1011300	8
chr1.1011301.1011600	2
chr1.1011601.1011900	37
chr1.1011901.1012200	1
chr1.1013101.1013400	1
chr1.1013401.1013700	17
chr1.1013701.1014000	1
chr1.1014001.1014300	1
chr1.1014301.1014600	1
chr1.1016101.1016400	44
chr1.10268701.10269000	1
chr1.10386001.10386300	26
chr1.1047601.1047900	3
chr1.1047901.1048200	4
chr1.10488001.10488300	2
chr1.1053001.1053300	1
chr1.10530901.10531200	1
chr1.10534501.10534800	1
chr1.10557301.10557600	2
chr1.10559401.10559700	3
chr1.106623301.106623600	1
chr1.106625701.106626000	1
chr1.10702801.10703100	1
chr1.1070401.1070700	8
chr1.10704301.10704600	1
chr1.10707001.10707300	10
chr1.10707601.10707900	1
chr1.10708201.10708500	1
chr1.10713001.10713300	5
chr1.10715401.10715700	1
chr1.10720201.10720500	1
chr1.10758301.10758600	1
chr1.10762201.10762500	30
chr1.10763701.10764000	67
chr1.10765501.10765800	2
chr1.10821601.10821900	1
chr1.108595501.108595800	2
chr1.108816301.108816600	30
chr1.1091401.1091700	1
chr1.109159501.109159800	14
chr1.109206301.109206600	1
chr1.1095301.1095600	1
chr1.109616701.109617000	1
chr1.109617301.109617600	20
chr1.109631101.109631400	2
chr1.109641601.109641900	1
chr1.109645201.109645500	19
chr1.109794301.109794600	4
chr1.109797601.109797900	24
chr1.1098001.1098300	1
chr1.109827601.109827900	1
chr1.109967701.109968000	6
chr1.110007601.110007900	2
chr1.110051401.110051700	8
chr1.110187001.110187300	38
chr1.110187301.110187600	22
chr1.110208901.110209200	2
chr1.1102201.1102500	1
chr1.1107301.1107600	7
chr1.1107601.1107900	20
chr1.110883001.110883300	5
chr1.1109401.1109700	1
chr1.110949001.110949300	1
chr1.1109701.1110000	55
chr1.1110901.1111200	14
chr1.11118901.11119200	13
chr1.111216001.111216300	4
chr1.111508201.111508500	19
chr1.11157601.11157900	8
chr1.1116601.1116900	4
chr1.112161601.112161900	20
chr1.112283101.112283400	4
chr1.112284901.112285200	1
chr1.112438801.112439100	4
chr1.112526401.112526700	3
chr1.113285701.113286000	14
chr1.11334301.11334600	1
chr1.113391001.113391300	1
chr1.1135501.1135800	1
chr1.113613301.113613600	72
chr1.113613601.113613900	3
chr1.113613901.113614200	1
chr1.113741701.113742000	1
chr1.1139701.1140000	1
chr1.1140301.1140600	16
chr1.1143001.1143300	11
chr1.1143301.1143600	1
chr1.1143601.1143900	1
chr1.114445801.114446100	1
chr1.114448501.114448800	7
chr1.1151101.1151400	10
chr1.1152001.1152300	7
chr1.1152901.1153200	1
chr1.115396501.115396800	11
chr1.115396801.115397100	2
chr1.11591701.11592000	1
chr1.1159501.1159800	1
chr1.1165501.1165800	18
chr1.116962801.116963100	1
chr1.1170001.1170300	1
chr1.1170601.1170900	1
chr1.117075601.117075900	35
chr1.117076801.117077100	2
chr1.117078001.117078300	22
chr1.1170901.1171200	8
chr1.117169501.117169800	55
chr1.1171801.1172100	1
chr1.1174801.1175100	12
chr1.117662101.117662400	1
chr1.11777401.11777700	10
chr1.11780401.11780700	1
chr1.11823301.11823600	2
chr1.1183801.1184100	32
chr1.1187401.1187700	10
chr1.1187701.1188000	1
chr1.1189201.1189500	1
chr1.11898901.11899200	4
chr1.1191001.1191300	4
chr1.119523301.119523600	4
chr1.119526301.119526600	2
chr1.11987401.11987700	1
chr1.11988301.11988600	1
chr1.11992801.11993100	10
chr1.11996701.11997000	2
chr1.1200901.1201200	1
chr1.120165901.120166200	1
chr1.120192001.120192300	4
chr1.1203901.1204200	1
chr1.120396001.120396300	6
chr1.12051001.12051300	1
chr1.1205101.1205400	13
chr1.1207201.1207500	45
chr1.12081001.12081300	1
chr1.120907801.120908100	15
chr1.120924001.120924300	1
chr1.12239101.12239400	20
chr1.12251701.12252000	2
chr1.1229101.1229400	1
chr1.12291601.12291900	2
chr1.1247701.1248000	31
chr1.1248001.1248300	1
chr1.1252201.1252500	1
chr1.12544201.12544500	4
chr1.1262401.1262700	33
chr1.1269001.1269300	20
chr1.12717901.12718200	7
chr1.1273201.1273500	5
chr1.1287601.1287900	56
chr1.1292401.1292700	2
chr1.1308001.1308300	29
chr1.1320601.1320900	19
chr1.1321501.1321800	1
chr1.1321801.1322100	6
chr1.1323301.1323600	1
chr1.1324201.1324500	2
chr1.132901.133200	38
chr1.1332301.1332600	25
chr1.133501.133800	2
chr1.135301.135600	17
chr1.1354801.1355100	1
chr1.13879201.13879500	12
chr1.13881001.13881300	3
chr1.1390501.1390800	6
chr1.13949701.13950000	4
chr1.1395901.1396200	56
chr1.1408201.1408500	15
chr1.1414801.1415100	6
chr1.1415101.1415400	7
chr1.1419001.1419300	2
chr1.142536001.142536300	4
chr1.142539001.142539300	3
chr1.142539301.142539600	5
chr1.142617901.142618200	83
chr1.142892401.142892700	1
chr1.143270101.143270400	1
chr1.143270701.143271000	1
chr1.143467201.143467500	2
chr1.143646901.143647200	1
chr1.143663701.143664000	46
chr1.1442401.1442700	1
chr1.144301201.144301500	1
chr1.144313201.144313500	2
chr1.1445101.1445400	4
chr1.144534601.144534900	1
chr1.144591601.144591900	20
chr1.144591901.144592200	3
chr1.144594901.144595200	5
chr1.1449001.1449300	1
chr1.1449901.1450200	6
chr1.145036201.145036500	1
chr1.145073701.145074000	4
chr1.145075801.145076100	5
chr1.145076101.145076400	8
chr1.145076401.145076700	188
chr1.145077001.145077300	1
chr1.145077301.145077600	2
chr1.145077601.145077900	26
chr1.1452601.1452900	3
chr1.145383001.145383300	1
chr1.145383301.145383600	4
chr1.145385401.145385700	6
chr1.145609201.145609500	1
chr1.145611601.145611900	1
chr1.145943701.145944000	1
chr1.145944301.145944600	13
chr1.146091601.146091900	2
chr1.146521501.146521800	3
chr1.146521801.146522100	6
chr1.146522101.146522400	1
chr1.146544001.146544300	7
chr1.146544301.146544600	10
chr1.146549101.146549400	1
chr1.146549401.146549700	2
chr1.146550001.146550300	4
chr1.1468501.1468800	3
chr1.1470301.1470600	8
chr1.1470901.1471200	1
chr1.147485701.147486000	1
chr1.147486001.147486300	3
chr1.147487201.147487500	8
chr1.147487501.147487800	2
chr1.147504601.147504900	7
chr1.147505801.147506100	4
chr1.147521701.147522000	1
chr1.147531301.147531600	7
chr1.1476001.1476300	89
chr1.147634801.147635100	4
chr1.1477201.1477500	5
chr1.147737401.147737700	1
chr1.147775801.147776100	14
chr1.147776101.147776400	223
chr1.147782401.147782700	18
chr1.147991801.147992100	1
chr1.147996001.147996300	16
chr1.148002301.148002600	1
chr1.148249501.148249800	3
chr1.148599601.148599900	1
chr1.148602301.148602600	1
chr1.148603201.148603500	21
chr1.148607401.148607700	73
chr1.148764601.148764900	1
chr1.148851901.148852200	1
chr1.148852201.148852500	4
chr1.148853401.148853700	1
chr1.148855501.148855800	2
chr1.148864501.148864800	21
chr1.148900501.148900800	16
chr1.149029201.149029500	301
chr1.149137201.149137500	1
chr1.149148301.149148600	13
chr1.149287501.149287800	41
chr1.149334001.149334300	39
chr1.149397301.149397600	2
chr1.149511301.149511600	1
chr1.149516401.149516700	1
chr1.149617801.149618100	1
chr1.1496401.1496700	1
chr1.149646301.149646600	3
chr1.149673001.149673300	2
chr1.149718901.149719200	5
chr1.149719501.149719800	9
chr1.149784301.149784600	1
chr1.149826301.149826600	1
chr1.1498501.1498800	3
chr1.149871601.149871900	16
chr1.149873701.149874000	1
chr1.149978401.149978700	1
chr1.150184801.150185100	6
chr1.150187201.150187500	1
chr1.150187501.150187800	22
chr1.150267301.150267600	1
chr1.150291601.150291900	1
chr1.150292801.150293100	8
chr1.150293701.150294000	21
chr1.150522601.150522900	3
chr1.150528601.150528900	1
chr1.150529201.150529500	1
chr1.150530101.150530400	1
chr1.150531001.150531300	1
chr1.1507501.1507800	13
chr1.150772501.150772800	18
chr1.1507801.1508100	53
chr1.150896701.150897000	13
chr1.151019401.151019700	1
chr1.151044001.151044300	14
chr1.151168501.151168800	9
chr1.151184701.151185000	1
chr1.151253101.151253400	1
chr1.15126301.15126600	9
chr1.15127201.15127500	1
chr1.15128101.15128400	3
chr1.15128401.15128700	50
chr1.151317601.151317900	1
chr1.151443601.151443900	7
chr1.151587001.151587300	4
chr1.151765201.151765500	3
chr1.151966801.151967100	3
chr1.152080201.152080500	2
chr1.152161501.152161800	3
chr1.152733001.152733300	1
chr1.1534201.1534500	5
chr1.153510001.153510300	1
chr1.153604501.153604800	26
chr1.153604801.153605100	2
chr1.153607501.153607800	17
chr1.153653101.153653400	2
chr1.153660601.153660900	4
chr1.153699601.153699900	7
chr1.153699901.153700200	7
chr1.153704701.153705000	12
chr1.153745501.153745800	2
chr1.15375301.15375600	15
chr1.15376501.15376800	1
chr1.153767701.153768000	1
chr1.153936901.153937200	11
chr1.153938101.153938400	5
chr1.153939001.153939300	2
chr1.153951901.153952200	24
chr1.153961501.153961800	1
chr1.154156201.154156500	1
chr1.154156501.154156800	1
chr1.154166101.154166400	2
chr1.154244101.154244400	1
chr1.154246501.154246800	1
chr1.154404901.154405200	1
chr1.154475401.154475700	22
chr1.154475701.154476000	1
chr1.154732501.154732800	1
chr1.154761001.154761300	1
chr1.154785901.154786200	1
chr1.154911001.154911300	1
chr1.154932601.154932900	2
chr1.154987801.154988100	1
chr1.154988101.154988400	1
chr1.154988701.154989000	36
chr1.154989001.154989300	51
chr1.155035201.155035500	25
chr1.155097301.155097600	4
chr1.155106301.155106600	1
chr1.155109001.155109300	3
chr1.155219101.155219400	22
chr1.1552201.1552500	1
chr1.155222701.155223000	1
chr1.155226301.155226600	3
chr1.155239501.155239800	11
chr1.155241301.155241600	28
chr1.1552501.1552800	1
chr1.155264701.155265000	118
chr1.1552801.1553100	27
chr1.15540301.15540600	13
chr1.155534101.155534400	36
chr1.155578801.155579100	25
chr1.155579101.155579400	68
chr1.155582101.155582400	2
chr1.155655901.155656200	93
chr1.155659501.155659800	16
chr1.155757001.155757300	5
chr1.156047101.156047400	1
chr1.156162301.156162600	4
chr1.156258901.156259200	10
chr1.156259201.156259500	1
chr1.156261001.156261300	100
chr1.156306601.156306900	3
chr1.156308701.156309000	126
chr1.156310201.156310500	38
chr1.156388201.156388500	7
chr1.156404701.156405000	2
chr1.156429301.156429600	1
chr1.156543601.156543900	21
chr1.156544501.156544800	1
chr1.156628501.156628800	2
chr1.156645001.156645300	2
chr1.15664801.15665100	1
chr1.156816301.156816600	3
chr1.156818701.156819000	2
chr1.156819001.156819300	2
chr1.156819901.156820200	3
chr1.156877501.156877800	2
chr1.156880501.156880800	3
chr1.156898201.156898500	1
chr1.1569301.1569600	3
chr1.156966301.156966600	1
chr1.157245001.157245300	5
chr1.157948801.157949100	1
chr1.1581901.1582200	1
chr1.15910501.15910800	1
chr1.15912601.15912900	8
chr1.15913501.15913800	1
chr1.15942301.15942600	1
chr1.15945901.15946200	2
chr1.15946201.15946500	8
chr1.159869101.159869400	2
chr1.159999301.159999600	35
chr1.160054501.160054800	8
chr1.1602601.1602900	1
chr1.1603201.1603500	17
chr1.160340701.160341000	31
chr1.160341001.160341300	3
chr1.16055401.16055700	2
chr1.16057201.16057500	1
chr1.16070401.16070700	1
chr1.16073401.16073700	1
chr1.1608301.1608600	1
chr1.160992901.160993200	14
chr1.161006701.161007000	2
chr1.161086801.161087100	1
chr1.161111701.161112000	2
chr1.161137801.161138100	2
chr1.161149201.161149500	2
chr1.161227801.161228100	2
chr1.16125301.16125600	28
chr1.161358901.161359200	6
chr1.161410801.161411100	1
chr1.161425501.161425800	155
chr1.161425801.161426100	11
chr1.161427301.161427600	15
chr1.161439901.161440200	8
chr1.161440801.161441100	18
chr1.161441101.161441400	1
chr1.161442601.161442900	1
chr1.161502001.161502300	5
chr1.16172701.16173000	6
chr1.161953201.161953500	1
chr1.162334801.162335100	1
chr1.162336901.162337200	1
chr1.162337201.162337500	3
chr1.162339001.162339300	1
chr1.162533401.162533700	72
chr1.1626601.1626900	1
chr1.16304401.16304700	2
chr1.16401001.16401300	1
chr1.16401601.16401900	5
chr1.1642801.1643100	6
chr1.164291101.164291400	1
chr1.1643101.1643400	1
chr1.164545801.164546100	4
chr1.164580901.164581200	3
chr1.16463101.16463400	9
chr1.16463401.16463700	2
chr1.16465201.16465500	1
chr1.16473001.16473300	1
chr1.16492501.16492800	13
chr1.16500301.16500600	1
chr1.16532101.16532400	10
chr1.16532401.16532700	15
chr1.165324601.165324900	3
chr1.16554301.16554600	9
chr1.1657501.1657800	1
chr1.16668901.16669200	1
chr1.166847701.166848000	14
chr1.166851901.166852200	1
chr1.16695601.16695900	2
chr1.167410801.167411100	2
chr1.167442601.167442900	11
chr1.167454001.167454300	4
chr1.167478901.167479200	8
chr1.167486701.167487000	1
chr1.1675201.1675500	15
chr1.1678801.1679100	118
chr1.1679401.1679700	16
chr1.168104101.168104400	3
chr1.16823401.16823700	1
chr1.16839001.16839300	2
chr1.1683901.1684200	4
chr1.1684201.1684500	1
chr1.1684501.1684800	2
chr1.16847101.16847400	128
chr1.16849801.16850100	1
chr1.16861501.16861800	1
chr1.1686301.1686600	12
chr1.16863601.16863900	3
chr1.1690501.1690800	2
chr1.169072501.169072800	6
chr1.1690801.1691100	1
chr1.1691101.1691400	1
chr1.16969201.16969500	106
chr1.16974001.16974300	1
chr1.16983301.16983600	1
chr1.17007001.17007300	2
chr1.17007601.17007900	1
chr1.17017201.17017500	18
chr1.17019301.17019600	1
chr1.17020801.17021100	1
chr1.17021101.17021400	2
chr1.17021401.17021700	54
chr1.170634901.170635200	58
chr1.17064901.17065200	1
chr1.17075701.17076000	4
chr1.17083801.17084100	1
chr1.17086501.17086800	7
chr1.17087401.17087700	28
chr1.1715101.1715400	1
chr1.171748801.171749100	1
chr1.17184901.17185200	2
chr1.17199901.17200200	12
chr1.17200801.17201100	1
chr1.172722001.172722300	54
chr1.17279701.17280000	1
chr1.17281201.17281500	7
chr1.17291101.17291400	3
chr1.17292601.17292900	2
chr1.17329801.17330100	5
chr1.17333401.17333700	13
chr1.173794501.173794800	2
chr1.173794801.173795100	1
chr1.173795101.173795400	11
chr1.17381401.17381700	1
chr1.173958601.173958900	15
chr1.173993401.173993700	1
chr1.17447401.17447700	25
chr1.17475901.17476200	6
chr1.17476201.17476500	1
chr1.17734501.17734800	2
chr1.17746201.17746500	7
chr1.17748301.17748600	10
chr1.17762101.17762400	52
chr1.178007701.178008000	35
chr1.178008001.178008300	9
chr1.178455901.178456200	1
chr1.178456501.178456800	1
chr1.178456801.178457100	2
chr1.178509901.178510200	1
chr1.17864101.17864400	1
chr1.179187301.179187600	2
chr1.179332501.179332800	3
chr1.179336101.179336400	1
chr1.179555701.179556000	13
chr1.179561701.179562000	8
chr1.17956201.17956500	2
chr1.17956501.17956800	1
chr1.179607001.179607300	1
chr1.17962501.17962800	3
chr1.179922301.179922600	3
chr1.1803001.1803300	28
chr1.180469501.180469800	1
chr1.180884101.180884400	3
chr1.181130401.181130700	3
chr1.181382101.181382400	3
chr1.1824601.1824900	21
chr1.182583601.182583900	23
chr1.182919601.182919900	2
chr1.182921101.182921400	2
chr1.182990101.182990400	1
chr1.182990401.182990700	7
chr1.1841401.1841700	1
chr1.184633501.184633800	2
chr1.184633801.184634100	1
chr1.184634101.184634400	1
chr1.1848001.1848300	12
chr1.1849501.1849800	8
chr1.1851901.1852200	19
chr1.185344501.185344800	13
chr1.1858501.1858800	2
chr1.1860901.1861200	1
chr1.186346801.186347100	4
chr1.18690901.18691200	8
chr1.18807901.18808200	6
chr1.1884601.1884900	1
chr1.1888801.1889100	8
chr1.18954601.18954900	2
chr1.189756301.189756600	1
chr1.1908001.1908300	1
chr1.19108501.19108800	2
chr1.1913701.1914000	52
chr1.19204201.19204500	3
chr1.19209001.19209300	1
chr1.192778801.192779100	23
chr1.19280401.19280700	1
chr1.19285201.19285500	1
chr1.193075801.193076100	1
chr1.19360201.19360500	29
chr1.1949701.1950000	25
chr1.1955401.1955700	1
chr1.1957201.1957500	6
chr1.19666501.19666800	11
chr1.1973101.1973400	2
chr1.19734901.19735200	3
chr1.1974901.1975200	1
chr1.197513701.197514000	38
chr1.1976701.1977000	2
chr1.19779001.19779300	3
chr1.197892301.197892600	10
chr1.198124501.198124800	1
chr1.19813801.19814100	10
chr1.198633901.198634200	3
chr1.198648301.198648600	2
chr1.1989301.1989600	38
chr1.1989601.1989900	29
chr1.20004601.20004900	1
chr1.20005501.20005800	1
chr1.2003701.2004000	2
chr1.200636401.200636700	1
chr1.2006401.2006700	26
chr1.200715901.200716200	5
chr1.200842501.200842800	1
chr1.200843101.200843400	26
chr1.200843701.200844000	18
chr1.200968201.200968500	11
chr1.200969101.200969400	27
chr1.200970001.200970300	23
chr1.200971201.200971500	1
chr1.201194701.201195000	5
chr1.201253201.201253500	80
chr1.201435301.201435600	1
chr1.201463801.201464100	8
chr1.201639901.201640200	1
chr1.201927001.201927300	3
chr1.20207701.20208000	3
chr1.20208301.20208600	3
chr1.202216801.202217100	1
chr1.202217101.202217400	1
chr1.2024401.2024700	3
chr1.202856401.202856700	178
chr1.202856701.202857000	9
chr1.203243701.203244000	1
chr1.203398201.203398500	1
chr1.203526601.203526900	19
chr1.203735401.203735700	3
chr1.2037601.2037900	2
chr1.203763601.203763900	2
chr1.203830501.203830800	2
chr1.2040301.2040600	2
chr1.204041701.204042000	1
chr1.204058201.204058500	3
chr1.2040901.2041200	1
chr1.2041201.2041500	1
chr1.204226501.204226800	1
chr1.2042401.2042700	4
chr1.2043001.2043300	1
chr1.2043301.2043600	5
chr1.204358201.204358500	5
chr1.204381901.204382200	1
chr1.204531001.204531300	12
chr1.204652201.204652500	2
chr1.204675601.204675900	1
chr1.204684301.204684600	1
chr1.2047501.2047800	1
chr1.204962101.204962400	2
chr1.205144501.205144800	2
chr1.205270201.205270500	19
chr1.205289401.205289700	6
chr1.205449601.205449900	1
chr1.205651501.205651800	44
chr1.205743001.205743300	2
chr1.205783801.205784100	1
chr1.205818901.205819200	15
chr1.205819201.205819500	1
chr1.206221801.206222100	2
chr1.2062501.2062800	3
chr1.206683201.206683500	79
chr1.207064201.207064500	1
chr1.207080701.207081000	31
chr1.207081001.207081300	1
chr1.208115701.208116000	1
chr1.209601001.209601300	8
chr1.20961901.20962200	2
chr1.209799301.209799600	1
chr1.20989501.20989800	16
chr1.210002101.210002400	1
chr1.21024601.21024900	1
chr1.21030601.21030900	46
chr1.21041701.21042000	1
chr1.21043201.21043500	10
chr1.21061201.21061500	28
chr1.210856501.210856800	1
chr1.21115501.21115800	1
chr1.211434901.211435200	36
chr1.211435201.211435500	7
chr1.211689301.211689600	5
chr1.211713001.211713300	31
chr1.2117701.2118000	3
chr1.212456101.212456400	103
chr1.212688901.212689200	13
chr1.212733001.212733300	1
chr1.212963701.212964000	75
chr1.212964001.212964300	5
chr1.213088201.213088500	14
chr1.213223201.213223500	26
chr1.213224101.213224400	29
chr1.213901501.213901800	31
chr1.2142001.2142300	2
chr1.214361401.214361700	13
chr1.2143801.2144100	15
chr1.214452601.214452900	1
chr1.214455901.214456200	5
chr1.214557901.214558200	3
chr1.214726501.214726800	1
chr1.214779601.214779900	4
chr1.214781701.214782000	45
chr1.215043601.215043900	8
chr1.215043901.215044200	5
chr1.21550501.21550800	1
chr1.215742301.215742600	6
chr1.2157901.2158200	2
chr1.21655501.21655800	6
chr1.21672901.21673200	28
chr1.21757201.21757500	1
chr1.21761101.21761400	3
chr1.21762901.21763200	3
chr1.21895201.21895500	1
chr1.21930301.21930600	4
chr1.21930601.21930900	138
chr1.21930901.21931200	1
chr1.21931201.21931500	8
chr1.21977401.21977700	1
chr1.219784201.219784500	2
chr1.219786601.219786900	1
chr1.220220401.220220700	1
chr1.220265401.220265700	1
chr1.220394101.220394400	2
chr1.220426801.220427100	3
chr1.22089001.22089300	26
chr1.2210401.2210700	2
chr1.221050501.221050800	15
chr1.221058301.221058600	1
chr1.221062201.221062500	12
chr1.221067601.221067900	6
chr1.221069701.221070000	1
chr1.22110601.22110900	1
chr1.22151101.22151400	1
chr1.22189201.22189500	1
chr1.22214101.22214400	4
chr1.2223301.2223600	1
chr1.222788701.222789000	2
chr1.222819301.222819600	2
chr1.222819601.222819900	1
chr1.222883501.222883800	5
chr1.223257001.223257300	1
chr1.223566901.223567200	1
chr1.223567501.223567800	4
chr1.223739701.223740000	1
chr1.223741201.223741500	17
chr1.223742701.223743000	28
chr1.223934101.223934400	1
chr1.223934401.223934700	2
chr1.224181001.224181300	16
chr1.224181901.224182200	13
chr1.224182201.224182500	3
chr1.224359501.224359800	4
chr1.224393101.224393400	4
chr1.22455601.22455900	2
chr1.22455901.22456200	3
chr1.2249101.2249400	4
chr1.224924701.224925000	14
chr1.224925301.224925600	1
chr1.225117901.225118200	19
chr1.225118501.225118800	1
chr1.2252101.2252400	7
chr1.226007101.226007400	16
chr1.226072201.226072500	16
chr1.226074301.226074600	2
chr1.226113601.226113900	11
chr1.226126801.226127100	1
chr1.226128901.226129200	1
chr1.226366201.226366500	4
chr1.226371901.226372200	2
chr1.226372501.226372800	1
chr1.226375801.226376100	9
chr1.226409401.226409700	1
chr1.226413001.226413300	6
chr1.2266201.2266500	1
chr1.226828201.226828500	5
chr1.226889101.226889400	132
chr1.226889401.226889700	3
chr1.226893001.226893300	5
chr1.22692001.22692300	1
chr1.226923301.226923600	26
chr1.227129401.227129700	3
chr1.227164501.227164800	6
chr1.227681701.227682000	79
chr1.227729101.227729400	8
chr1.227753401.227753700	2
chr1.2277901.2278200	5
chr1.227920801.227921100	4
chr1.227973601.227973900	1
chr1.227974201.227974500	9
chr1.228003601.228003900	4
chr1.228075301.228075600	1
chr1.228274201.228274500	1
chr1.22829101.22829400	1
chr1.228327001.228327300	17
chr1.228329701.228330000	3
chr1.228346801.228347100	5
chr1.228351601.228351900	14
chr1.228360301.228360600	3
chr1.228360601.228360900	12
chr1.228361201.228361500	2
chr1.228363601.228363900	4
chr1.228364201.228364500	4
chr1.228507601.228507900	9
chr1.228549001.228549300	3
chr1.228549301.228549600	1
chr1.228550201.228550500	3
chr1.228557701.228558000	20
chr1.228558001.228558300	14
chr1.228560101.228560400	9
chr1.228613501.228613800	3
chr1.228635401.228635700	5
chr1.228676201.228676500	1
chr1.228686101.228686400	7
chr1.228742501.228742800	1
chr1.228744001.228744300	1
chr1.228744301.228744600	2
chr1.228745201.228745500	1
chr1.228747901.228748200	1
chr1.228749101.228749400	1
chr1.228751801.228752100	1
chr1.228752701.228753000	4
chr1.228753901.228754200	1
chr1.228754201.228754500	1
chr1.228754801.228755100	3
chr1.228759601.228759900	5
chr1.228760201.228760500	1
chr1.228761401.228761700	2
chr1.228764401.228764700	1
chr1.228765901.228766200	1
chr1.228769801.228770100	1
chr1.228772501.228772800	1
chr1.228773701.228774000	1
chr1.228774601.228774900	1
chr1.228778501.228778800	2
chr1.228779101.228779400	1
chr1.228780001.228780300	1
chr1.228890401.228890700	5
chr1.228963001.228963300	6
chr1.22900801.22901100	1
chr1.22905301.22905600	2
chr1.229210501.229210800	15
chr1.22926301.22926600	1
chr1.22926601.22926900	4
chr1.22926901.22927200	1
chr1.22928401.22928700	5
chr1.22928701.22929000	6
chr1.229365901.229366200	1
chr1.229406401.229406700	74
chr1.229408201.229408500	8
chr1.229695601.229695900	1
chr1.229731601.229731900	2
chr1.2302201.2302500	19
chr1.230250001.230250300	17
chr1.2303101.2303400	5
chr1.230407501.230407800	19
chr1.231006001.231006300	1
chr1.231006301.231006600	32
chr1.231025501.231025800	1
chr1.231038401.231038700	1
chr1.23110801.23111100	64
chr1.231173101.231173400	6
chr1.231476101.231476400	3
chr1.2316601.2316900	2
chr1.231666001.231666300	115
chr1.231666301.231666600	221
chr1.2317801.2318100	1
chr1.2318401.2318700	4
chr1.231939301.231939600	10
chr1.232352701.232353000	14
chr1.2324401.2324700	13
chr1.23278201.23278500	16
chr1.23279401.23279700	9
chr1.233121601.233121900	1
chr1.2333101.2333400	1
chr1.2333401.2333700	7
chr1.233464801.233465100	2
chr1.23348101.23348400	2
chr1.2340301.2340600	1
chr1.234559201.234559500	1
chr1.2346301.2346600	5
chr1.234792901.234793200	8
chr1.234881401.234881700	2
chr1.234908701.234909000	24
chr1.235011301.235011600	31
chr1.235158301.235158600	3
chr1.235323301.235323600	2
chr1.23541301.23541600	4
chr1.235804801.235805100	1
chr1.235805401.235805700	56
chr1.235807201.235807500	2
chr1.235807501.235807800	4
chr1.236155501.236155800	20
chr1.236156401.236156700	5
chr1.236156701.236157000	4
chr1.236157601.236157900	78
chr1.2361901.2362200	3
chr1.236307601.236307900	2
chr1.236442901.236443200	3
chr1.236447101.236447400	5
chr1.236510701.236511000	1
chr1.236847601.236847900	1
chr1.236848801.236849100	41
chr1.236849101.236849400	1
chr1.2369701.2370000	3
chr1.23762101.23762400	8
chr1.23763601.23763900	5
chr1.2377501.2377800	8
chr1.237833401.237833700	7
chr1.237946801.237947100	7
chr1.238106401.238106700	1
chr1.238106701.238107000	30
chr1.2386501.2386800	2
chr1.2386801.2387100	8
chr1.23894401.23894700	2
chr1.2389801.2390100	6
chr1.23947501.23947800	1
chr1.24016501.24016800	1
chr1.24016801.24017100	4
chr1.240307801.240308100	1
chr1.240370801.240371100	20
chr1.240371101.240371400	5
chr1.240371401.240371700	33
chr1.240371701.240372000	56
chr1.240372901.240373200	70
chr1.240569101.240569400	59
chr1.240569401.240569700	10
chr1.240569701.240570000	3
chr1.240986401.240986700	2
chr1.240987601.240987900	3
chr1.24102601.24102900	10
chr1.24104101.24104400	1
chr1.24116401.24116700	12
chr1.2411701.2412000	1
chr1.2414701.2415000	4
chr1.2415301.2415600	1
chr1.242013301.242013600	7
chr1.24228601.24228900	4
chr1.24284401.24284700	4
chr1.24285001.24285300	3
chr1.24307801.24308100	1
chr1.2432101.2432400	30
chr1.243264601.243264900	10
chr1.243487201.243487500	1
chr1.243649501.243649800	9
chr1.243649801.243650100	3
chr1.243650101.243650400	1
chr1.243650401.243650700	1
chr1.2438101.2438400	2
chr1.24395101.24395400	1
chr1.2440501.2440800	1
chr1.244142401.244142700	3
chr1.2446201.2446500	7
chr1.244625101.244625400	6
chr1.2446801.2447100	4
chr1.2448001.2448300	1
chr1.244815301.244815600	5
chr1.2449501.2449800	2
chr1.245135401.245135700	4
chr1.24516901.24517200	1
chr1.245496601.245496900	15
chr1.245740801.245741100	3
chr1.245754601.245754900	16
chr1.245755201.245755500	1
chr1.245835001.245835300	2
chr1.245846401.245846700	12
chr1.245850301.245850600	51
chr1.245852401.245852700	8
chr1.246137701.246138000	18
chr1.246138301.246138600	5
chr1.246138901.246139200	43
chr1.246139201.246139500	8
chr1.246139501.246139800	1
chr1.246139801.246140100	8
chr1.246414601.246414900	1
chr1.2466601.2466900	2
chr1.246671401.246671700	4
chr1.246783901.246784200	5
chr1.246845401.246845700	1
chr1.246950401.246950700	3
chr1.246951901.246952200	8
chr1.247093201.247093500	71
chr1.247169701.247170000	8
chr1.247170601.247170900	2
chr1.247268401.247268700	41
chr1.247290601.247290900	7
chr1.247335001.247335300	11
chr1.247463701.247464000	1
chr1.247465801.247466100	1
chr1.247614601.247614900	13
chr1.247803001.247803300	1
chr1.247803601.247803900	1
chr1.248100601.248100900	8
chr1.24861001.24861300	1
chr1.248855401.248855700	2
chr1.249105601.249105900	2
chr1.249106201.249106500	1
chr1.249106801.249107100	49
chr1.249139801.249140100	8
chr1.249142201.249142500	2
chr1.249142801.249143100	1
chr1.249166801.249167100	2
chr1.24967801.24968100	1
chr1.24969001.24969300	2
chr1.25071001.25071300	4
chr1.25074001.25074300	26
chr1.2520001.2520300	1
chr1.25227001.25227300	1
chr1.25247101.25247400	1
chr1.25248901.25249200	17
chr1.25250101.25250400	4
chr1.25254001.25254300	5
chr1.25257901.25258200	1
chr1.2526001.2526300	4
chr1.2526601.2526900	10
chr1.2529001.2529300	91
chr1.25292401.25292700	1
chr1.25355101.25355400	1
chr1.2539801.2540100	3
chr1.25560901.25561200	3
chr1.25568101.25568400	1
chr1.2561101.2561400	18
chr1.26098201.26098500	1
chr1.26098501.26098800	3
chr1.26099401.26099700	2
chr1.26123701.26124000	1
chr1.26149201.26149500	9
chr1.26186701.26187000	8
chr1.26247001.26247300	1
chr1.26322601.26322900	14
chr1.26325001.26325300	3
chr1.26364001.26364300	3
chr1.26435101.26435400	2
chr1.26439901.26440200	1
chr1.26490301.26490600	2
chr1.26490901.26491200	17
chr1.26498101.26498400	2
chr1.26634301.26634600	4
chr1.26687101.26687400	1
chr1.26687701.26688000	2
chr1.26826001.26826300	3
chr1.26828101.26828400	3
chr1.26828401.26828700	1
chr1.2707201.2707500	8
chr1.27143701.27144000	1
chr1.27144001.27144300	6
chr1.27144301.27144600	3
chr1.27145201.27145500	3
chr1.27145801.27146100	1
chr1.27152101.27152400	2
chr1.2715901.2716200	3
chr1.27192601.27192900	1
chr1.27214501.27214800	42
chr1.27218101.27218400	2
chr1.27228001.27228300	6
chr1.27287701.27288000	2
chr1.27321901.27322200	5
chr1.27339601.27339900	10
chr1.27339901.27340200	3
chr1.27340201.27340500	81
chr1.27353401.27353700	21
chr1.27676201.27676500	67
chr1.27677701.27678000	1
chr1.27678901.27679200	9
chr1.27679801.27680100	1
chr1.27683701.27684000	2
chr1.27687901.27688200	4
chr1.27690301.27690600	2
chr1.27690901.27691200	7
chr1.2774401.2774700	13
chr1.2775901.2776200	1
chr1.2777101.2777400	1
chr1.27817801.27818100	1
chr1.27891301.27891600	4
chr1.27893701.27894000	4
chr1.27899401.27899700	4
chr1.27940501.27940800	2
chr1.27940801.27941100	1
chr1.27993901.27994200	1
chr1.27995401.27995700	3
chr1.28050901.28051200	27
chr1.28189501.28189800	20
chr1.28197301.28197600	37
chr1.28239601.28239900	30
chr1.28283401.28283700	2
chr1.28284901.28285200	7
chr1.2848201.2848500	1
chr1.2848501.2848800	41
chr1.28495501.28495800	27
chr1.28572001.28572300	4
chr1.28583701.28584000	3
chr1.28641601.28641900	1
chr1.28694101.28694400	2
chr1.2876101.2876400	2
chr1.2876701.2877000	2
chr1.28842601.28842900	2
chr1.2886301.2886600	1
chr1.28881601.28881900	3
chr1.2888401.2888700	1
chr1.28909201.28909500	1
chr1.28917601.28917900	6
chr1.28920001.28920300	15
chr1.28920601.28920900	2
chr1.28970401.28970700	1
chr1.29102701.29103000	29
chr1.2916901.2917200	2
chr1.2917801.2918100	1
chr1.29188801.29189100	1
chr1.29189401.29189700	21
chr1.2919301.2919600	5
chr1.2920501.2920800	1
chr1.2930701.2931000	7
chr1.2931001.2931300	14
chr1.29451601.29451900	31
chr1.29451901.29452200	1
chr1.29458801.29459100	1
chr1.29460301.29460600	12
chr1.29462401.29462700	38
chr1.29509201.29509500	23
chr1.29584801.29585100	46
chr1.2980801.2981100	4
chr1.2983801.2984100	1
chr1.3000001.3000300	16
chr1.3028201.3028500	3
chr1.3055201.3055500	2
chr1.3055501.3055800	1
chr1.3060301.3060600	1
chr1.3070201.3070500	1
chr1.3105001.3105300	1
chr1.31190701.31191000	2
chr1.31245901.31246200	6
chr1.31279501.31279800	1
chr1.31382701.31383000	13
chr1.3146401.3146700	1
chr1.3146701.3147000	7
chr1.3148501.3148800	10
chr1.3153901.3154200	1
chr1.3154801.3155100	7
chr1.3159001.3159300	3
chr1.31627201.31627500	2
chr1.31629001.31629300	1
chr1.31630201.31630500	4
chr1.3164401.3164700	9
chr1.3180601.3180900	1
chr1.3180901.3181200	376
chr1.3181801.3182100	5
chr1.3186601.3186900	16
chr1.31904401.31904700	80
chr1.31904701.31905000	175
chr1.3193501.3193800	2
chr1.3193801.3194100	1
chr1.3194101.3194400	24
chr1.3197401.3197700	1
chr1.32002501.32002800	3
chr1.3204301.3204600	3
chr1.32050201.32050500	2
chr1.32051101.32051400	1
chr1.32052601.32052900	1
chr1.32208901.32209200	3
chr1.32209201.32209500	4
chr1.32221501.32221800	44
chr1.32256301.32256600	2
chr1.3231601.3231900	6
chr1.3239401.3239700	1
chr1.3240001.3240300	67
chr1.32405101.32405400	2
chr1.32411701.32412000	4
chr1.3241201.3241500	8
chr1.3241501.3241800	19
chr1.3251701.3252000	18
chr1.32574601.32574900	2
chr1.3273001.3273300	2
chr1.32738701.32739000	4
chr1.32741101.32741400	4
chr1.32756701.32757000	1
chr1.3279301.3279600	7
chr1.32815501.32815800	5
chr1.32815801.32816100	8
chr1.32824801.32825100	1
chr1.32826301.32826600	1
chr1.32827201.32827500	2
chr1.329701.330000	4
chr1.33003601.33003900	1
chr1.3307801.3308100	1
chr1.3310201.3310500	8
chr1.3310501.3310800	10
chr1.3320701.3321000	11
chr1.33219901.33220200	4
chr1.33222001.33222300	1
chr1.33236701.33237000	3
chr1.3325801.3326100	1
chr1.33281401.33281700	1
chr1.3329401.3329700	11
chr1.3332101.3332400	10
chr1.3339901.3340200	3
chr1.3340201.3340500	11
chr1.33429301.33429600	2
chr1.33439801.33440100	4
chr1.33516601.33516900	2
chr1.33516901.33517200	457
chr1.33517201.33517500	120
chr1.33622501.33622800	12
chr1.3371701.3372000	7
chr1.3373501.3373800	43
chr1.33772501.33772800	10
chr1.33772801.33773100	13
chr1.33939001.33939300	1
chr1.3394501.3394800	9
chr1.3394801.3395100	4
chr1.34089901.34090200	21
chr1.3420901.3421200	1
chr1.3429001.3429300	1
chr1.3438001.3438300	7
chr1.3446701.3447000	2
chr1.3449701.3450000	14
chr1.34643401.34643700	1
chr1.3497701.3498000	2
chr1.3499801.3500100	5
chr1.3500101.3500400	2
chr1.3501301.3501600	13
chr1.3501901.3502200	1
chr1.3511201.3511500	6
chr1.3513001.3513300	1
chr1.3525601.3525900	35
chr1.3525901.3526200	6
chr1.35398201.35398500	2
chr1.3555001.3555300	1
chr1.35659801.35660100	3
chr1.3571501.3571800	1
chr1.3590401.3590700	3
chr1.36038401.36038700	6
chr1.36038701.36039000	11
chr1.36039001.36039300	1
chr1.36039301.36039600	2
chr1.3606901.3607200	4
chr1.36107401.36107700	1
chr1.3623101.3623400	1
chr1.36236101.36236400	2
chr1.36236701.36237000	3
chr1.36283801.36284100	81
chr1.3632401.3632700	8
chr1.36348301.36348600	7
chr1.36553201.36553500	38
chr1.36553501.36553800	3
chr1.36591301.36591600	88
chr1.36613801.36614100	1
chr1.36774901.36775200	13
chr1.36785101.36785400	1
chr1.36787501.36787800	1
chr1.36787801.36788100	10
chr1.36806701.36807000	2
chr1.36807001.36807300	56
chr1.36807301.36807600	16
chr1.36814501.36814800	7
chr1.3691501.3691800	1
chr1.3714601.3714900	5
chr1.3714901.3715200	2
chr1.3729901.3730200	5
chr1.3731101.3731400	1
chr1.3732001.3732300	1
chr1.3771601.3771900	5
chr1.3772501.3772800	3
chr1.3772801.3773100	3
chr1.3774901.3775200	10
chr1.3776401.3776700	2
chr1.37785001.37785300	1
chr1.3791701.3792000	2
chr1.37981801.37982100	7
chr1.38018401.38018700	5
chr1.3807901.3808200	1
chr1.3808201.3808500	18
chr1.3809101.3809400	1
chr1.38102401.38102700	16
chr1.38155801.38156100	1
chr1.38158801.38159100	2
chr1.38476801.38477100	9
chr1.38513401.38513700	1
chr1.39326701.39327000	6
chr1.39336301.39336600	57
chr1.39596401.39596700	1
chr1.39959101.39959400	1
chr1.39982201.39982500	1
chr1.4005001.4005300	7
chr1.40105801.40106100	1
chr1.40202101.40202400	1
chr1.40205401.40205700	5
chr1.40255201.40255500	9
chr1.40350301.40350600	2
chr1.40565101.40565400	2
chr1.40596901.40597200	3
chr1.40600501.40600800	18
chr1.40600801.40601100	1
chr1.40601101.40601400	7
chr1.40626301.40626600	6
chr1.40767001.40767300	1
chr1.40769701.40770000	5
chr1.40770601.40770900	1
chr1.40770901.40771200	8
chr1.4079101.4079400	12
chr1.41329201.41329500	1
chr1.41348101.41348400	7
chr1.41481601.41481900	5
chr1.41484301.41484600	3
chr1.41824501.41824800	1
chr1.41825701.41826000	1
chr1.41851201.41851500	2
chr1.41887801.41888100	5
chr1.41891401.41891700	4
chr1.41994601.41994900	1
chr1.42249001.42249300	2
chr1.42354001.42354300	1
chr1.42611701.42612000	8
chr1.42802201.42802500	1
chr1.42845101.42845400	4
chr1.42921301.42921600	5
chr1.42927601.42927900	14
chr1.43126201.43126500	17
chr1.43204201.43204500	21
chr1.43205401.43205700	1
chr1.43205701.43206000	22
chr1.43351501.43351800	6
chr1.43353901.43354200	1
chr1.43422001.43422300	1
chr1.43471501.43471800	1
chr1.43472101.43472400	3
chr1.43473301.43473600	1
chr1.43473601.43473900	19
chr1.43612501.43612800	1
chr1.43737301.43737600	1
chr1.43770301.43770600	2
chr1.43770901.43771200	1
chr1.43814101.43814400	2
chr1.43815301.43815600	55
chr1.43835101.43835400	2
chr1.43857901.43858200	27
chr1.44055601.44055900	1
chr1.44056801.44057100	1
chr1.44070301.44070600	35
chr1.44072401.44072700	1
chr1.44072701.44073000	1
chr1.44114701.44115000	3
chr1.44115001.44115300	50
chr1.44381101.44381400	18
chr1.44411101.44411400	15
chr1.44430901.44431200	7
chr1.44569801.44570100	110
chr1.44703901.44704200	1
chr1.44823001.44823300	46
chr1.44869501.44869800	5
chr1.44869801.44870100	16
chr1.449101.449400	143
chr1.449401.449700	157
chr1.449701.450000	4
chr1.450301.450600	2
chr1.450601.450900	31
chr1.45189901.45190200	58
chr1.452101.452400	2
chr1.45238801.45239100	25
chr1.45269701.45270000	2
chr1.45309301.45309600	5
chr1.45450301.45450600	6
chr1.45450901.45451200	1
chr1.45453301.45453600	3
chr1.45453601.45453900	1
chr1.45790801.45791100	1
chr1.45804901.45805200	23
chr1.45963301.45963600	1
chr1.46087801.46088100	1
chr1.46088701.46089000	1
chr1.46091101.46091400	2
chr1.46155001.46155300	22
chr1.46215601.46215900	1
chr1.46267201.46267500	12
chr1.46631401.46631700	2
chr1.46631701.46632000	3
chr1.46667101.46667400	6
chr1.46705501.46705800	7
chr1.46706101.46706400	134
chr1.46706401.46706700	90
chr1.46707301.46707600	16
chr1.46770601.46770900	2
chr1.46793701.46794000	12
chr1.46805101.46805400	1
chr1.46805701.46806000	1
chr1.46806001.46806300	3
chr1.46857901.46858200	45
chr1.46950601.46950900	1
chr1.46951801.46952100	6
chr1.4707601.4707900	2
chr1.4726501.4726800	170
chr1.4726801.4727100	104
chr1.47694301.47694600	15
chr1.47694601.47694900	100
chr1.47782201.47782500	61
chr1.47800801.47801100	1
chr1.47883001.47883300	1
chr1.47899501.47899800	12
chr1.48000601.48000900	3
chr1.4831801.4832100	2
chr1.4832401.4832700	1
chr1.5033101.5033400	10
chr1.50881201.50881500	2
chr1.51808501.51808800	6
chr1.51808801.51809100	1
chr1.52197001.52197300	17
chr1.52508101.52508400	5
chr1.52885201.52885500	1
chr1.53068801.53069100	2
chr1.53069101.53069400	5
chr1.53092501.53092800	2
chr1.53392201.53392500	8
chr1.53392501.53392800	6
chr1.534301.534600	4
chr1.53542801.53543100	3
chr1.53558701.53559000	1
chr1.53742001.53742300	42
chr1.53743201.53743500	2
chr1.53903701.53904000	5
chr1.54141301.54141600	3
chr1.543601.543900	1
chr1.54412801.54413100	43
chr1.546301.546600	1
chr1.54723901.54724200	1
chr1.54819901.54820200	2
chr1.54821401.54821700	20
chr1.55007101.55007400	1
chr1.55413901.55414200	9
chr1.57024601.57024900	10
chr1.5771701.5772000	1
chr1.57892501.57892800	1
chr1.58716001.58716300	1
chr1.6050101.6050400	19
chr1.6054901.6055200	4
chr1.6084301.6084600	17
chr1.6132001.6132300	1
chr1.61369201.61369500	2
chr1.61385701.61386000	1
chr1.61579201.61579500	1
chr1.6186001.6186300	2
chr1.6186301.6186600	2
chr1.6186601.6186900	1
chr1.6187801.6188100	1
chr1.6189001.6189300	2
chr1.6200101.6200400	3
chr1.6203401.6203700	10
chr1.6210601.6210900	3
chr1.6210901.6211200	10
chr1.62121901.62122200	1
chr1.62191801.62192100	1
chr1.62206801.62207100	4
chr1.6242401.6242700	1
chr1.6243001.6243300	5
chr1.62659501.62659800	17
chr1.6268501.6268800	11
chr1.6270901.6271200	1
chr1.62785801.62786100	28
chr1.62901001.62901300	3
chr1.6294901.6295200	1
chr1.6296101.6296400	6
chr1.6297001.6297300	3
chr1.6308701.6309000	1
chr1.63151501.63151800	4
chr1.6315301.6315600	48
chr1.6315601.6315900	3
chr1.6336601.6336900	4
chr1.6338701.6339000	22
chr1.6341101.6341400	3
chr1.6351301.6351600	1
chr1.6359701.6360000	7
chr1.64060201.64060500	2
chr1.6454801.6455100	21
chr1.6455101.6455400	2
chr1.6499501.6499800	10
chr1.6503101.6503400	1
chr1.6523801.6524100	3
chr1.6531301.6531600	1
chr1.6531601.6531900	43
chr1.6533101.6533400	1
chr1.65467201.65467500	8
chr1.6547201.6547500	1
chr1.6552001.6552300	1
chr1.6558001.6558300	6
chr1.65613901.65614200	6
chr1.66257701.66258000	10
chr1.6637801.6638100	2
chr1.6653101.6653400	1
chr1.6654301.6654600	4
chr1.6654601.6654900	1
chr1.6658501.6658800	1
chr1.6658801.6659100	22
chr1.6664501.6664800	1
chr1.6672301.6672600	29
chr1.6677401.6677700	1
chr1.6677701.6678000	4
chr1.6683101.6683400	5
chr1.6708901.6709200	2
chr1.67598101.67598400	12
chr1.6760501.6760800	2
chr1.6762601.6762900	2
chr1.6764101.6764400	1
chr1.68101201.68101500	1
chr1.6847801.6848100	33
chr1.68510401.68510700	6
chr1.68515801.68516100	1
chr1.68516401.68516700	1
chr1.68517601.68517900	1
chr1.70036201.70036500	1
chr1.7123201.7123500	1
chr1.71400001.71400300	36
chr1.71510101.71510400	14
chr1.7539001.7539300	1
chr1.7540501.7540800	1
chr1.76260901.76261200	16
chr1.7725001.7725300	19
chr1.7743001.7743300	1
chr1.78404101.78404400	1
chr1.7884901.7885200	43
chr1.789601.789900	8
chr1.789901.790200	40
chr1.790201.790500	2
chr1.8012101.8012400	4
chr1.801901.802200	152
chr1.802201.802500	28
chr1.8086501.8086800	1
chr1.8087101.8087400	3
chr1.8276701.8277000	12
chr1.8376901.8377200	2
chr1.8379601.8379900	1
chr1.838501.838800	2
chr1.838801.839100	4
chr1.8389501.8389800	1
chr1.8391601.8391900	1
chr1.8391901.8392200	1
chr1.8397001.8397300	1
chr1.8403301.8403600	5
chr1.8416801.8417100	1
chr1.8417101.8417400	8
chr1.8420101.8420400	195
chr1.84545401.84545700	19
chr1.846601.846900	1
chr1.8485501.8485800	7
chr1.85087201.85087500	2
chr1.852601.852900	3
chr1.85932301.85932600	2
chr1.86047501.86047800	4
chr1.86081701.86082000	53
chr1.86082001.86082300	1
chr1.86620801.86621100	2
chr1.871501.871800	62
chr1.873901.874200	3
chr1.886501.886800	2
chr1.887101.887400	36
chr1.8879701.8880000	19
chr1.888301.888600	12
chr1.89358601.89358900	4
chr1.89358901.89359200	2
chr1.89457601.89457900	3
chr1.89457901.89458200	1
chr1.8981701.8982000	1
chr1.898801.899100	2
chr1.89887501.89887800	5
chr1.899701.900000	4
chr1.903001.903300	1
chr1.903301.903600	1
chr1.904501.904800	2
chr1.9099301.9099600	1
chr1.912301.912600	2
chr1.9131101.9131400	1
chr1.91357501.91357800	4
chr1.914101.914400	1
chr1.914401.914700	6
chr1.918601.918900	4
chr1.92413201.92413500	3
chr1.92495101.92495400	2
chr1.92682901.92683200	1
chr1.92945401.92945700	19
chr1.92945701.92946000	2
chr1.92947201.92947500	2
chr1.931501.931800	4
chr1.93248101.93248400	9
chr1.9325201.9325500	7
chr1.93425401.93425700	1
chr1.93644701.93645000	1
chr1.93647401.93647700	5
chr1.94134001.94134300	3
chr1.94148101.94148400	17
chr1.942001.942300	1
chr1.9429001.9429300	3
chr1.9429301.9429600	9
chr1.945601.945900	1
chr1.94714801.94715100	1
chr1.94715101.94715400	2
chr1.948301.948600	15
chr1.953401.953700	3
chr1.95388301.95388600	5
chr1.95394301.95394600	1
chr1.95697901.95698200	1
chr1.961801.962100	2
chr1.964801.965100	1
chr1.965101.965400	14
chr1.9670801.9671100	2
chr1.9684901.9685200	13
chr1.9686701.9687000	4
chr1.9710401.9710700	9
chr1.9710701.9711000	1
chr1.973201.973500	1
chr1.9749701.9750000	63
chr1.9788401.9788700	2
chr1.9789901.9790200	3
chr1.980101.980400	7
chr1.985501.985800	1
chr1.986401.986700	1
chr1.988201.988500	9
chr1.993001.993300	1
chr10.100225801.100226100	3
chr10.101086801.101087100	1
chr10.101280901.101281200	50
chr10.101282101.101282400	1
chr10.101287201.101287500	4
chr10.101297701.101298000	45
chr10.101418301.101418600	35
chr10.101493001.101493300	20
chr10.101493601.101493900	2
chr10.101597701.101598000	1
chr10.101874001.101874300	1
chr10.101874601.101874900	7
chr10.101875801.101876100	76
chr10.101988001.101988300	4
chr10.102026401.102026700	17
chr10.1022701.1023000	1
chr10.102276901.102277200	1
chr10.102487201.102487500	7
chr10.102633301.102633600	1
chr10.102777601.102777900	2
chr10.102780301.102780600	1
chr10.102789601.102789900	3
chr10.102883501.102883800	6
chr10.102888901.102889200	1
chr10.102973201.102973500	13
chr10.103053301.103053600	1
chr10.103589101.103589400	1
chr10.1036201.1036500	1
chr10.103823101.103823400	2
chr10.103913701.103914000	1
chr10.103914001.103914300	1
chr10.104002201.104002500	2
chr10.104160301.104160600	1
chr10.104172301.104172600	1
chr10.104218801.104219100	25
chr10.104471101.104471400	1
chr10.104628001.104628300	6
chr10.104629801.104630100	7
chr10.104631001.104631300	1
chr10.104676601.104676900	127
chr10.104676901.104677200	9
chr10.104679301.104679600	19
chr10.105126001.105126300	23
chr10.105130201.105130500	1
chr10.105233701.105234000	3
chr10.105234001.105234300	3
chr10.105234301.105234600	1
chr10.105251101.105251400	7
chr10.105317101.105317400	22
chr10.105345601.105345900	1
chr10.105361801.105362100	1
chr10.105378901.105379200	2
chr10.105426601.105426900	1
chr10.105448201.105448500	6
chr10.105452401.105452700	1
chr10.105630901.105631200	1
chr10.105725701.105726000	1
chr10.105726001.105726300	1
chr10.105728701.105729000	9
chr10.106032601.106032900	2
chr10.1101601.1101900	22
chr10.110359801.110360100	1
chr10.111966001.111966300	38
chr10.112254901.112255200	1
chr10.112326301.112326600	1
chr10.11385901.11386200	1
chr10.114109801.114110100	6
chr10.114712801.114713100	2
chr10.1147501.1147800	1
chr10.1147801.1148100	4
chr10.114852301.114852600	26
chr10.1149901.1150200	1
chr10.115080001.115080300	3
chr10.115437901.115438200	9
chr10.115862101.115862400	2
chr10.115938301.115938600	3
chr10.116044501.116044800	3
chr10.116394301.116394600	12
chr10.117885001.117885300	1
chr10.118154701.118155000	1
chr10.118369801.118370100	7
chr10.118503901.118504200	1
chr10.118545601.118545900	1
chr10.118546201.118546500	2
chr10.118549501.118549800	7
chr10.118763401.118763700	1
chr10.118765801.118766100	60
chr10.118766101.118766400	2
chr10.118767001.118767300	6
chr10.118895701.118896000	13
chr10.118896001.118896300	94
chr10.11934601.11934900	18
chr10.11935801.11936100	2
chr10.11940601.11940900	1
chr10.119806801.119807100	1
chr10.119807101.119807400	1
chr10.120354301.120354600	3
chr10.120354901.120355200	11
chr10.120357001.120357300	3
chr10.1205401.1205700	2
chr10.1206601.1206900	1
chr10.1207501.1207800	2
chr10.120800401.120800700	1
chr10.120801901.120802200	2
chr10.120802201.120802500	3
chr10.120841801.120842100	1
chr10.120861901.120862200	14
chr10.1209301.1209600	3
chr10.120964801.120965100	1
chr10.120965101.120965400	1
chr10.121277401.121277700	2
chr10.121578001.121578300	1
chr10.1218001.1218300	1
chr10.1219501.1219800	2
chr10.12235801.12236100	1
chr10.122609101.122609400	7
chr10.123925201.123925500	1
chr10.124070701.124071000	2
chr10.1242001.1242300	4
chr10.124249801.124250100	1
chr10.124254301.124254600	1
chr10.124578601.124578900	12
chr10.124638001.124638300	1
chr10.124638901.124639200	1
chr10.124640101.124640400	1
chr10.124738501.124738800	8
chr10.125142901.125143200	1
chr10.1252201.1252500	1
chr10.125730301.125730600	8
chr10.125751001.125751300	12
chr10.126150001.126150300	1
chr10.126211801.126212100	1
chr10.126276301.126276600	1
chr10.126301501.126301800	4
chr10.126303001.126303300	1
chr10.126330601.126330900	7
chr10.126383401.126383700	1
chr10.126421501.126421800	2
chr10.126481201.126481500	2
chr10.126686101.126686400	1
chr10.126712801.126713100	4
chr10.126839401.126839700	1
chr10.126915301.126915600	4
chr10.126915601.126915900	10
chr10.127406401.127406700	2
chr10.127460701.127461000	1
chr10.127510501.127510800	2
chr10.127511101.127511400	9
chr10.127584001.127584300	3
chr10.127585501.127585800	75
chr10.128194501.128194800	18
chr10.128595001.128595300	26
chr10.128595601.128595900	3
chr10.1286101.1286400	1
chr10.1286401.1286700	2
chr10.129193201.129193500	1
chr10.129536701.129537000	8
chr10.129537601.129537900	1
chr10.12958501.12958800	3
chr10.12961501.12961800	6
chr10.129774901.129775200	21
chr10.129926701.129927000	2
chr10.130007701.130008000	51
chr10.130008001.130008300	1
chr10.130011001.130011300	10
chr10.130011601.130011900	1
chr10.130015201.130015500	5
chr10.130065301.130065600	1
chr10.130506901.130507200	1
chr10.131264101.131264400	1
chr10.131265901.131266200	1
chr10.131577901.131578200	8
chr10.131578201.131578500	4
chr10.131594101.131594400	1
chr10.131638801.131639100	1
chr10.131639101.131639400	6
chr10.131664001.131664300	2
chr10.131687401.131687700	62
chr10.131694601.131694900	65
chr10.131749801.131750100	1
chr10.131772001.131772300	3
chr10.131773201.131773500	2
chr10.131843701.131844000	37
chr10.131935801.131936100	1
chr10.131986201.131986500	1
chr10.131989801.131990100	7
chr10.13204501.13204800	1
chr10.132317701.132318000	1
chr10.132892201.132892500	5
chr10.133058401.133058700	3
chr10.133059601.133059900	2
chr10.133318201.133318500	4
chr10.133449001.133449300	3
chr10.13345501.13345800	1
chr10.133506601.133506900	1
chr10.133509001.133509300	4
chr10.133644301.133644600	3
chr10.133665901.133666200	3
chr10.133851601.133851900	1
chr10.133930201.133930500	12
chr10.133931701.133932000	1
chr10.133938301.133938600	16
chr10.133950901.133951200	1
chr10.133951501.133951800	1
chr10.133954501.133954800	1
chr10.133955401.133955700	7
chr10.134018401.134018700	3
chr10.134021401.134021700	1
chr10.134038801.134039100	7
chr10.134040001.134040300	5
chr10.134093701.134094000	1
chr10.134094001.134094300	93
chr10.134097001.134097300	57
chr10.134097301.134097600	34
chr10.134124001.134124300	6
chr10.134164201.134164500	60
chr10.134166001.134166300	3
chr10.134211901.134212200	5
chr10.134216401.134216700	1
chr10.134222101.134222400	5
chr10.134267101.134267400	5
chr10.134303101.134303400	1
chr10.134306401.134306700	13
chr10.134318401.134318700	1
chr10.134349301.134349600	7
chr10.134349601.134349900	1
chr10.134352901.134353200	4
chr10.134409901.134410200	1
chr10.134430001.134430300	4
chr10.134461201.134461500	11
chr10.134468401.134468700	3
chr10.134475301.134475600	3
chr10.134528101.134528400	2
chr10.134534101.134534400	343
chr10.134535601.134535900	44
chr10.134538001.134538300	1
chr10.134541901.134542200	18
chr10.134548801.134549100	13
chr10.134550301.134550600	4
chr10.134584201.134584500	1
chr10.134585401.134585700	1
chr10.134586301.134586600	1
chr10.134595601.134595900	10
chr10.134603401.134603700	7
chr10.134608501.134608800	1
chr10.134609101.134609400	1
chr10.134619901.134620200	1
chr10.134671501.134671800	1
chr10.134684101.134684400	3
chr10.134691901.134692200	2
chr10.134694901.134695200	1
chr10.134698201.134698500	1
chr10.134700301.134700600	2
chr10.134700601.134700900	118
chr10.134700901.134701200	28
chr10.134723401.134723700	150
chr10.134729401.134729700	1
chr10.134734501.134734800	1
chr10.134739001.134739300	1
chr10.134741101.134741400	1
chr10.134742601.134742900	3
chr10.134754301.134754600	1
chr10.134758501.134758800	2
chr10.134773201.134773500	1
chr10.134776501.134776800	99
chr10.134778601.134778900	2
chr10.134778901.134779200	1
chr10.134781001.134781300	19
chr10.134790901.134791200	2
chr10.134793601.134793900	2
chr10.134804401.134804700	8
chr10.134819701.134820000	10
chr10.134824501.134824800	4
chr10.134826001.134826300	1
chr10.134833801.134834100	1
chr10.134845201.134845500	5
chr10.134846701.134847000	10
chr10.134854801.134855100	12
chr10.134855101.134855400	2
chr10.134862601.134862900	76
chr10.134882401.134882700	13
chr10.134884501.134884800	3
chr10.134889001.134889300	1
chr10.134895301.134895600	1
chr10.134896201.134896500	2
chr10.134896501.134896800	1
chr10.134898001.134898300	2
chr10.134903401.134903700	1
chr10.134913901.134914200	3
chr10.134936101.134936400	4
chr10.134937301.134937600	8
chr10.134957701.134958000	2
chr10.134971201.134971500	2
chr10.134971501.134971800	2
chr10.134976301.134976600	1
chr10.134991601.134991900	1
chr10.135004201.135004500	2
chr10.135021301.135021600	2
chr10.135021901.135022200	3
chr10.135027601.135027900	24
chr10.135031501.135031800	7
chr10.135032101.135032400	1
chr10.135032401.135032700	1
chr10.135034801.135035100	16
chr10.135036001.135036300	4
chr10.135036301.135036600	11
chr10.135036601.135036900	51
chr10.135041101.135041400	2
chr10.135042901.135043200	1
chr10.135045001.135045300	4
chr10.135051001.135051300	1
chr10.135080101.135080400	1
chr10.135087901.135088200	3
chr10.135095401.135095700	1
chr10.135096001.135096300	1
chr10.135096901.135097200	97
chr10.135097201.135097500	3
chr10.135101101.135101400	6
chr10.135105001.135105300	11
chr10.135118801.135119100	1
chr10.135120001.135120300	1
chr10.135120601.135120900	10
chr10.135125101.135125400	5
chr10.135142201.135142500	3
chr10.135143701.135144000	468
chr10.135144001.135144300	6
chr10.135147001.135147300	27
chr10.135188101.135188400	1
chr10.135190801.135191100	3
chr10.135193801.135194100	30
chr10.135195301.135195600	1
chr10.135204301.135204600	16
chr10.135208501.135208800	1
chr10.135215101.135215400	1
chr10.135216001.135216300	1
chr10.135245701.135246000	21
chr10.135248401.135248700	1
chr10.135258901.135259200	3
chr10.135281101.135281400	1
chr10.135378601.135378900	1
chr10.135381601.135381900	4
chr10.135392401.135392700	1
chr10.135436501.135436800	2
chr10.135477901.135478200	2
chr10.135478201.135478500	1
chr10.135478501.135478800	2
chr10.135480901.135481200	13
chr10.135481201.135481500	10
chr10.135481501.135481800	1
chr10.135482701.135483000	1
chr10.135483901.135484200	2
chr10.135484501.135484800	50
chr10.135485101.135485400	57
chr10.135487801.135488100	2
chr10.135489301.135489600	2
chr10.135492901.135493200	1
chr10.135493501.135493800	5
chr10.135495001.135495300	3
chr10.135495601.135495900	1
chr10.135497401.135497700	10
chr10.135497701.135498000	1
chr10.135498001.135498300	1
chr10.135498601.135498900	12
chr10.13626901.13627200	3
chr10.13692601.13692900	1
chr10.13700701.13701000	21
chr10.13807801.13808100	1
chr10.1403401.1403700	1
chr10.14057101.14057400	6
chr10.1406701.1407000	3
chr10.1438501.1438800	3
chr10.14601901.14602200	59
chr10.14999701.15000000	1
chr10.1505401.1505700	2
chr10.1506001.1506300	2
chr10.1506601.1506900	1
chr10.1508101.1508400	2
chr10.15129601.15129900	1
chr10.15131401.15131700	1
chr10.15140101.15140400	1
chr10.1516201.1516500	1
chr10.15190801.15191100	6
chr10.15191101.15191400	70
chr10.15763201.15763500	101
chr10.1596601.1596900	1
chr10.16561801.16562100	106
chr10.17656801.17657100	1
chr10.17657101.17657400	1
chr10.17658001.17658300	9
chr10.18239101.18239400	1
chr10.184201.184500	15
chr10.18999901.19000200	1
[truncated: 16,512 more rows]

## Sheet: 10_6_BLCA
DMR	N_of_occurrence
chr1.10001401.10001700	11
chr1.10004101.10004400	7
chr1.100170001.100170300	13
chr1.1002001.1002300	1
chr1.1002901.1003200	2
chr1.1003501.1003800	22
chr1.100436701.100437000	4
chr1.100596001.100596300	3
chr1.100599601.100599900	16
chr1.100815601.100815900	12
chr1.10091701.10092000	51
chr1.10092001.10092300	4
chr1.10092301.10092600	2
chr1.100966201.100966500	1
chr1.1009801.1010100	16
chr1.1011001.1011300	3
chr1.1011301.1011600	3
chr1.1011601.1011900	6
chr1.1012801.1013100	5
chr1.1013401.1013700	6
chr1.1013701.1014000	16
chr1.1014001.1014300	4
chr1.1016701.1017000	2
chr1.1020601.1020900	5
chr1.1023901.1024200	4
chr1.1024501.1024800	5
chr1.10268701.10269000	6
chr1.10269001.10269300	6
chr1.1028701.1029000	3
chr1.10386001.10386300	3
chr1.10387501.10387800	3
chr1.10488001.10488300	3
chr1.10491601.10491900	4
chr1.10491901.10492200	1
chr1.1053001.1053300	16
chr1.10533001.10533300	1
chr1.1053301.1053600	3
chr1.10533601.10533900	2
chr1.10534501.10534800	7
chr1.10536901.10537200	7
chr1.10556401.10556700	4
chr1.106338301.106338600	1
chr1.106625701.106626000	10
chr1.10698901.10699200	22
chr1.10699201.10699500	1
chr1.10702201.10702500	59
chr1.10703101.10703400	13
chr1.10707601.10707900	1
chr1.10708501.10708800	1
chr1.10708801.10709100	1
chr1.10713301.10713600	1
chr1.10715401.10715700	2
chr1.10716001.10716300	1
chr1.1071901.1072200	14
chr1.10719901.10720200	5
chr1.10725001.10725300	1
chr1.10725901.10726200	1
chr1.1074301.1074600	1
chr1.10765501.10765800	15
chr1.10766701.10767000	2
chr1.10813501.10813800	2
chr1.10816201.10816500	54
chr1.108963901.108964200	4
chr1.109159501.109159800	53
chr1.109203301.109203600	1
chr1.109422001.109422300	2
chr1.109506301.109506600	1
chr1.109587001.109587300	1
chr1.1095901.1096200	1
chr1.109617301.109617600	26
chr1.109620001.109620300	16
chr1.109645201.109645500	130
chr1.109755601.109755900	23
chr1.109794301.109794600	1
chr1.109797601.109797900	5
chr1.109967401.109967700	4
chr1.109967701.109968000	1
chr1.10997701.10998000	16
chr1.110007601.110007900	1
chr1.110051401.110051700	8
chr1.1100701.1101000	1
chr1.110196301.110196600	1
chr1.110208901.110209200	2
chr1.110211601.110211900	53
chr1.110212201.110212500	1
chr1.11040001.11040300	46
chr1.110578501.110578800	6
chr1.1107301.1107600	4
chr1.11073601.11073900	2
chr1.11074801.11075100	16
chr1.110757601.110757900	1
chr1.1107601.1107900	7
chr1.110883001.110883300	2
chr1.110895601.110895900	2
chr1.1109401.1109700	4
chr1.110947801.110948100	6
chr1.110949001.110949300	1
chr1.1110901.1111200	8
chr1.1111201.1111500	1
chr1.11117101.11117400	1
chr1.11118301.11118600	2
chr1.11118601.11118900	1
chr1.111321901.111322200	17
chr1.1113901.1114200	2
chr1.111508201.111508500	1
chr1.1115101.1115400	12
chr1.1115401.1115700	1
chr1.11157601.11157900	6
chr1.112284901.112285200	1
chr1.112525501.112525800	2
chr1.1131601.1131900	1
chr1.11320801.11321100	10
chr1.11324101.11324400	8
chr1.113249101.113249400	3
chr1.113284801.113285100	11
chr1.113285701.113286000	1
chr1.113286001.113286300	26
chr1.113286301.113286600	47
chr1.11334301.11334600	2
chr1.113391001.113391300	1
chr1.113392801.113393100	2
chr1.113393401.113393700	1
chr1.113393701.113394000	6
chr1.113499301.113499600	5
chr1.113499601.113499900	1
chr1.1135501.1135800	1
chr1.113613301.113613600	8
chr1.113741401.113741700	1
chr1.1143001.1143300	1
chr1.1143301.1143600	1
chr1.114355501.114355800	1
chr1.115046701.115047000	1
chr1.1151401.1151700	1
chr1.1152001.1152300	4
chr1.1152301.1152600	2
chr1.115396201.115396500	2
chr1.115396501.115396800	1
chr1.11559901.11560200	3
chr1.11587801.11588100	2
chr1.11591401.11591700	2
chr1.11591701.11592000	1
chr1.11592001.11592300	1
chr1.11598301.11598600	76
chr1.116038201.116038500	1
chr1.1161001.1161300	5
chr1.116371501.116371800	1
chr1.116371801.116372100	5
chr1.1164001.1164300	3
chr1.116693101.116693400	17
chr1.116710201.116710500	13
chr1.1168201.1168500	1
chr1.1169401.1169700	1
chr1.116961901.116962200	2
chr1.1170001.1170300	3
chr1.117018001.117018300	1
chr1.117075601.117075900	43
chr1.117078001.117078300	2
chr1.11707801.11708100	1
chr1.11708701.11709000	2
chr1.11713201.11713500	16
chr1.117169501.117169800	5
chr1.11725201.11725500	10
chr1.11725501.11725800	1
chr1.117280801.117281100	4
chr1.117284101.117284400	1
chr1.1173001.1173300	8
chr1.1174201.1174500	14
chr1.117450601.117450900	7
chr1.117451801.117452100	1
chr1.1174801.1175100	5
chr1.11748901.11749200	1
chr1.117666301.117666600	6
chr1.11777401.11777700	1
chr1.11780401.11780700	1
chr1.11781301.11781600	1
chr1.11781601.11781900	1
chr1.11794201.11794500	1
chr1.11794801.11795100	24
chr1.118146901.118147200	1
chr1.118147201.118147500	1
chr1.118147501.118147800	2
chr1.11822701.11823000	1
chr1.11823001.11823300	2
chr1.1183201.1183500	28
chr1.1183801.1184100	8
chr1.1186201.1186500	1
chr1.118727401.118727700	1
chr1.1187401.1187700	5
chr1.1187701.1188000	1
chr1.1189201.1189500	1
chr1.1189501.1189800	5
chr1.11898601.11898900	78
chr1.11898901.11899200	11
chr1.11921101.11921400	1
chr1.119523301.119523600	4
chr1.119526301.119526600	33
chr1.11987101.11987400	1
chr1.11987401.11987700	1
chr1.11988301.11988600	1
chr1.11992501.11992800	3
chr1.11995801.11996100	3
chr1.1201201.1201500	2
chr1.120166801.120167100	4
chr1.120192301.120192600	1
chr1.120255901.120256200	4
chr1.12038401.12038700	3
chr1.1203901.1204200	4
chr1.12039601.12039900	1
chr1.120439501.120439800	1
chr1.12079201.12079500	11
chr1.1208101.1208400	2
chr1.12081301.12081600	1
chr1.120904801.120905100	9
chr1.120907801.120908100	1
chr1.120924001.120924300	1
chr1.1210501.1210800	2
chr1.121259701.121260000	11
chr1.121261501.121261800	6
chr1.12150601.12150900	1
chr1.12228301.12228600	8
chr1.12228901.12229200	6
chr1.12239101.12239400	2
chr1.12251701.12252000	11
chr1.1227601.1227900	1
chr1.1227901.1228200	1
chr1.12291901.12292200	71
chr1.1232101.1232400	1
chr1.1248001.1248300	1
chr1.1250101.1250400	2
chr1.1257601.1257900	1
chr1.12579001.12579300	40
chr1.12579301.12579600	2
chr1.12600301.12600600	1
chr1.12601201.12601500	6
chr1.1262401.1262700	20
chr1.1265101.1265400	1
chr1.12681901.12682200	23
chr1.1269001.1269300	1
chr1.1273201.1273500	11
chr1.1287601.1287900	68
chr1.1295401.1295700	3
chr1.1308301.1308600	26
chr1.1320601.1320900	1
chr1.1321801.1322100	5
chr1.1339801.1340100	1
chr1.1341301.1341600	1
chr1.1344001.1344300	1
chr1.134701.135000	1
chr1.135301.135600	80
chr1.1353601.1353900	1
chr1.1356901.1357200	1
chr1.1376101.1376400	1
chr1.13842601.13842900	2
chr1.1387501.1387800	1
chr1.13879201.13879500	8
chr1.1389601.1389900	3
chr1.1390501.1390800	6
chr1.1391401.1391700	1
chr1.1395001.1395300	1
chr1.1397701.1398000	2
chr1.1412101.1412400	1
chr1.1414801.1415100	6
chr1.1419901.1420200	1
chr1.1420201.1420500	4
chr1.142536301.142536600	1
chr1.142539001.142539300	2
chr1.142539301.142539600	22
chr1.142617901.142618200	47
chr1.142618501.142618800	1
chr1.142619101.142619400	2
chr1.142890301.142890600	1
chr1.142890901.142891200	3
chr1.142893001.142893300	33
chr1.143270101.143270400	22
chr1.143465101.143465400	1
chr1.143664601.143664900	5
chr1.143688001.143688300	12
chr1.144301501.144301800	6
chr1.144531601.144531900	3
chr1.144534301.144534600	1
chr1.144591601.144591900	8
chr1.1449001.1449300	6
chr1.145076101.145076400	6
chr1.145076401.145076700	63
chr1.145077001.145077300	2
chr1.145077601.145077900	29
chr1.145137601.145137900	2
chr1.145380601.145380900	1
chr1.145381501.145381800	6
chr1.145383301.145383600	1
chr1.145385401.145385700	1
chr1.1454101.1454400	1
chr1.145574401.145574700	2
chr1.145590301.145590600	1
chr1.145611601.145611900	6
chr1.145943701.145944000	3
chr1.145944001.145944300	1
chr1.1459801.1460100	1
chr1.146079301.146079600	1
chr1.146090401.146090700	15
chr1.146091601.146091900	3
chr1.1462801.1463100	3
chr1.146367601.146367900	1
chr1.146544001.146544300	1
chr1.146544301.146544600	4
chr1.146544601.146544900	5
chr1.146544901.146545200	4
chr1.146549701.146550000	1
chr1.146550601.146550900	1
chr1.146555101.146555400	30
chr1.146712901.146713200	1
chr1.1468501.1468800	1
chr1.1469101.1469400	1
chr1.147486301.147486600	2
chr1.147487201.147487500	1
chr1.147487501.147487800	40
chr1.147487801.147488100	2
chr1.147505801.147506100	1
chr1.147506101.147506400	1
chr1.147521701.147522000	1
chr1.147522001.147522300	1
chr1.147531301.147531600	1
chr1.147531601.147531900	3
chr1.1476001.1476300	5
chr1.147618601.147618900	3
chr1.147621001.147621300	1
chr1.147621301.147621600	1
chr1.147632701.147633000	1
chr1.147717901.147718200	1
chr1.147718501.147718800	9
chr1.147736801.147737100	1
chr1.147737401.147737700	5
chr1.147753301.147753600	6
chr1.147776101.147776400	23
chr1.147996001.147996300	2
chr1.147997801.147998100	4
chr1.148002001.148002300	3
chr1.148002301.148002600	1
chr1.148247401.148247700	65
chr1.148554901.148555200	7
chr1.148555201.148555500	7
chr1.148557301.148557600	1
chr1.148603201.148603500	8
chr1.148607401.148607700	16
chr1.148758601.148758900	3
chr1.148764601.148764900	3
chr1.148851901.148852200	1
chr1.148852201.148852500	2
chr1.148853401.148853700	1
chr1.148853701.148854000	1
chr1.148855201.148855500	4
chr1.148855501.148855800	6
chr1.148864501.148864800	1
chr1.148900501.148900800	14
chr1.1489801.1490100	24
chr1.149029201.149029500	27
chr1.1491001.1491300	1
chr1.149136601.149136900	1
chr1.149222101.149222400	5
chr1.149287201.149287500	1
chr1.149333101.149333400	1
chr1.149333701.149334000	3
chr1.149334001.149334300	12
chr1.149378101.149378400	2
chr1.149397301.149397600	2
chr1.149397901.149398200	4
chr1.149398501.149398800	1
chr1.149511301.149511600	1
chr1.149604001.149604300	3
chr1.149604601.149604900	8
chr1.149607901.149608200	3
chr1.1496401.1496700	2
chr1.149646301.149646600	33
chr1.149673301.149673600	4
chr1.149673601.149673900	1
chr1.149718301.149718600	18
chr1.149719501.149719800	1
chr1.149765401.149765700	12
chr1.149811301.149811600	7
chr1.1498501.1498800	2
chr1.149873101.149873400	1
chr1.1498801.1499100	13
chr1.150184801.150185100	2
chr1.150187501.150187800	17
chr1.150209401.150209700	31
chr1.150267601.150267900	1
chr1.150267901.150268200	15
chr1.150292801.150293100	20
chr1.150487201.150487500	9
chr1.150519301.150519600	1
chr1.150519901.150520200	7
chr1.150522601.150522900	7
chr1.150523801.150524100	1
chr1.150524101.150524400	4
chr1.150529201.150529500	11
chr1.150530701.150531000	1
chr1.150531001.150531300	41
chr1.1507801.1508100	7
chr1.1508401.1508700	6
chr1.150849901.150850200	5
chr1.150897301.150897600	2
chr1.151105801.151106100	1
chr1.151107301.151107600	17
chr1.151184701.151185000	38
chr1.151253101.151253400	1
chr1.15128401.15128700	138
chr1.151511101.151511400	3
chr1.151583101.151583400	31
chr1.152010301.152010600	1
chr1.152161501.152161800	19
chr1.15240001.15240300	2
chr1.152486701.152487000	4
chr1.15335701.15336000	32
chr1.1533901.1534200	1
chr1.153583501.153583800	7
chr1.1536001.1536300	5
chr1.153604801.153605100	2
chr1.153607501.153607800	31
chr1.153630301.153630600	2
chr1.153633001.153633300	19
chr1.153660301.153660600	2
chr1.153661201.153661500	1
chr1.153661501.153661800	1
chr1.1536901.1537200	4
chr1.153699601.153699900	11
chr1.153699901.153700200	7
chr1.15373801.15374100	2
chr1.15375301.15375600	7
chr1.153754201.153754500	5
chr1.15376501.15376800	8
chr1.153913201.153913500	10
chr1.153915001.153915300	73
chr1.153936901.153937200	2
chr1.153951901.153952200	2
chr1.154156501.154156800	2
chr1.154166101.154166400	10
chr1.154405201.154405500	3
chr1.154475101.154475400	25
chr1.154475401.154475700	60
chr1.154533001.154533300	6
chr1.154546501.154546800	3
chr1.154584001.154584300	1
chr1.154732501.154732800	1
chr1.154733701.154734000	2
chr1.15481801.15482100	1
chr1.1548301.1548600	7
chr1.154911001.154911300	2
chr1.154932601.154932900	1
chr1.154988701.154989000	6
chr1.154989001.154989300	3
chr1.155035501.155035800	12
chr1.155038501.155038800	2
chr1.155042401.155042700	3
chr1.155096401.155096700	2
chr1.155097301.155097600	3
chr1.155098201.155098500	18
chr1.155098801.155099100	1
chr1.155106301.155106600	14
chr1.155143501.155143800	3
chr1.155148301.155148600	5
chr1.155218501.155218800	3
chr1.155226001.155226300	5
chr1.155226301.155226600	2
chr1.155237101.155237400	1
chr1.155239501.155239800	11
chr1.155241901.155242200	5
chr1.155248801.155249100	42
chr1.155249701.155250000	5
chr1.155264401.155264700	2
chr1.155267401.155267700	7
chr1.1552801.1553100	6
chr1.155295001.155295300	3
chr1.155577901.155578200	7
chr1.155582101.155582400	5
chr1.155655901.155656200	16
chr1.155659501.155659800	2
chr1.1557001.1557300	1
chr1.15585301.15585600	1
chr1.15585901.15586200	1
chr1.155919001.155919300	12
chr1.156027001.156027300	7
chr1.156049201.156049500	2
chr1.156053101.156053400	1
chr1.156074101.156074400	42
chr1.156104401.156104700	1
chr1.156104701.156105000	1
chr1.156162901.156163200	2
chr1.156186601.156186900	1
chr1.156261001.156261300	37
chr1.156261301.156261600	1
chr1.156308701.156309000	6
chr1.156338401.156338700	2
chr1.156358201.156358500	3
chr1.156424801.156425100	5
chr1.156426001.156426300	1
chr1.156475201.156475500	29
chr1.156617101.156617400	23
chr1.156629101.156629400	5
chr1.15664201.15664500	3
chr1.156739501.156739800	35
chr1.1567501.1567800	1
chr1.156783901.156784200	1
chr1.156813001.156813300	3
chr1.156816301.156816600	18
chr1.156819901.156820200	3
chr1.156878701.156879000	2
chr1.156880501.156880800	2
chr1.1569301.1569600	13
chr1.1569601.1569900	1
chr1.156966601.156966900	6
chr1.157075801.157076100	2
chr1.157082701.157083000	3
chr1.157243201.157243500	4
chr1.157948801.157949100	5
chr1.1580101.1580400	2
chr1.15827701.15828000	2
chr1.15848401.15848700	2
chr1.15910501.15910800	2
chr1.15913501.15913800	5
chr1.15928801.15929100	2
chr1.15931201.15931500	4
chr1.15931801.15932100	17
chr1.15942601.15942900	1
chr1.159897901.159898200	1
chr1.160054201.160054500	1
chr1.160054501.160054800	1
chr1.160054801.160055100	2
chr1.1600801.1601100	1
chr1.16009501.16009800	1
chr1.16013101.16013400	2
chr1.160233001.160233300	4
chr1.1603201.1603500	2
chr1.160340701.160341000	4
chr1.160369801.160370100	1
chr1.160371001.160371300	1
chr1.160371901.160372200	20
chr1.160387801.160388100	5
chr1.160389301.160389600	11
chr1.1604401.1604700	1
chr1.16059601.16059900	1
chr1.16071001.16071300	1
chr1.16073401.16073700	3
chr1.160772101.160772400	7
chr1.160881001.160881300	5
chr1.1608901.1609200	1
chr1.1609801.1610100	6
chr1.160992901.160993200	13
chr1.161010301.161010600	2
chr1.161085901.161086200	10
chr1.161110801.161111100	5
chr1.161148901.161149200	2
chr1.161227801.161228100	4
chr1.16125301.16125600	22
chr1.161282701.161283000	2
chr1.161410501.161410800	24
chr1.161410801.161411100	92
chr1.161412601.161412900	45
chr1.161412901.161413200	1
chr1.161417701.161418000	73
chr1.161424901.161425200	6
chr1.161425801.161426100	73
chr1.161426401.161426700	2
chr1.161427301.161427600	15
chr1.161432101.161432400	3
chr1.161432701.161433000	2
chr1.161433001.161433300	5
chr1.161433601.161433900	3
chr1.161434801.161435100	1
chr1.161439601.161439900	11
chr1.161440501.161440800	6
chr1.161440801.161441100	77
chr1.161441101.161441400	38
chr1.161441401.161441700	3
chr1.161442001.161442300	1
chr1.161442601.161442900	1
chr1.161574301.161574600	2
chr1.161574901.161575200	24
chr1.161576701.161577000	1
chr1.16164901.16165200	1
chr1.161720101.161720400	5
chr1.16172101.16172400	11
chr1.16172401.16172700	1
chr1.161953501.161953800	2
chr1.161973301.161973600	2
chr1.161992201.161992500	16
chr1.1622101.1622400	37
chr1.162339001.162339300	1
chr1.162339301.162339600	1
chr1.162370501.162370800	6
chr1.162370801.162371100	23
chr1.1625401.1625700	1
chr1.16270501.16270800	35
chr1.16342501.16342800	1
chr1.1635001.1635300	1
chr1.16397401.16397700	9
chr1.16401001.16401300	2
chr1.16401301.16401600	1
chr1.16401601.16401900	7
chr1.164290801.164291100	1
chr1.164291101.164291400	3
chr1.1643101.1643400	4
chr1.1643401.1643700	3
chr1.16463101.16463400	2
chr1.16465201.16465500	2
chr1.16477201.16477500	8
chr1.16493701.16494000	103
chr1.16500301.16500600	1
chr1.16536301.16536600	1
chr1.16541701.16542000	2
chr1.16553701.16554000	20
chr1.16554001.16554300	1
chr1.16554901.16555200	14
chr1.16565701.16566000	3
chr1.1657201.1657500	12
chr1.16676701.16677000	2
chr1.166847101.166847400	1
chr1.166890601.166890900	1
chr1.166891801.166892100	18
chr1.1669501.1669800	1
chr1.16695601.16695900	3
chr1.166957201.166957500	2
chr1.167088301.167088600	4
chr1.167091601.167091900	38
chr1.1671901.1672200	1
chr1.1672201.1672500	6
chr1.167442601.167442900	3
chr1.167453701.167454000	1
chr1.167478601.167478900	4
chr1.1675201.1675500	3
chr1.167615701.167616000	2
chr1.16765801.16766100	1
chr1.167689201.167689500	2
chr1.1679401.1679700	6
chr1.16809001.16809300	5
chr1.16809301.16809600	6
chr1.16809601.16809900	4
chr1.168104101.168104400	3
chr1.16811101.16811400	1
chr1.16812001.16812300	10
chr1.168193801.168194100	20
chr1.16826101.16826400	3
chr1.16827001.16827300	4
chr1.1683901.1684200	6
chr1.16839301.16839600	1
chr1.1684201.1684500	1
chr1.16847101.16847400	32
chr1.16849501.16849800	3
chr1.16849801.16850100	24
chr1.16861501.16861800	1
chr1.16863601.16863900	3
chr1.1687201.1687500	1
chr1.169072501.169072800	6
chr1.1692601.1692900	1
chr1.1693201.1693500	1
chr1.16937701.16938000	11
chr1.16938601.16938900	1
chr1.16974301.16974600	12
chr1.16974901.16975200	6
chr1.16976401.16976700	6
chr1.16983601.16983900	2
chr1.16984801.16985100	5
chr1.17006401.17006700	29
chr1.17007001.17007300	13
chr1.17007601.17007900	1
chr1.17007901.17008200	2
chr1.17016601.17016900	26
chr1.17018701.17019000	2
chr1.17020201.17020500	1
chr1.17021101.17021400	2
chr1.17021401.17021700	2
chr1.17026801.17027100	1
chr1.17033701.17034000	9
chr1.170634901.170635200	4
chr1.17065501.17065800	1
chr1.17067901.17068200	21
chr1.17075701.17076000	6
chr1.17077501.17077800	3
chr1.17084101.17084400	1
chr1.17085301.17085600	3
chr1.17086501.17086800	2
chr1.17087401.17087700	30
chr1.17088901.17089200	1
chr1.171170701.171171000	2
chr1.171748801.171749100	1
chr1.171752701.171753000	3
chr1.17199901.17200200	2
chr1.17200201.17200500	14
chr1.17200501.17200800	1
chr1.17239501.17239800	1
chr1.17242801.17243100	22
chr1.17279701.17280000	1
chr1.17280001.17280300	1
chr1.17280601.17280900	2
chr1.17282701.17283000	6
chr1.172888501.172888800	4
chr1.17291101.17291400	3
chr1.17292301.17292600	6
chr1.17292601.17292900	3
chr1.17308801.17309100	1
chr1.17309101.17309400	3
chr1.17329801.17330100	4
chr1.17331001.17331300	4
chr1.173640601.173640900	1
chr1.17381101.17381400	123
chr1.174130801.174131100	1
chr1.174131101.174131400	3
chr1.17447401.17447700	1
chr1.17494501.17494800	1
chr1.175048201.175048500	31
chr1.175546801.175547100	1
chr1.175547101.175547400	2
chr1.175568401.175568700	1
chr1.17732401.17732700	1
chr1.17736001.17736300	1
chr1.17762101.17762400	3
chr1.178007701.178008000	13
chr1.178455901.178456200	1
chr1.178456801.178457100	14
chr1.178457101.178457400	3
chr1.178509901.178510200	2
chr1.178510201.178510500	1
chr1.178512601.178512900	2
chr1.178548901.178549200	1
chr1.17868601.17868900	8
chr1.178993801.178994100	70
chr1.178994101.178994400	7
chr1.178997401.178997700	1
chr1.179049601.179049900	13
chr1.179053201.179053500	15
chr1.179265301.179265600	1
chr1.179336101.179336400	10
chr1.17949301.17949600	1
chr1.17949601.17949900	4
chr1.17950201.17950500	9
chr1.17951101.17951400	2
chr1.179556601.179556900	2
chr1.179559601.179559900	6
chr1.179561401.179561700	2
chr1.180883801.180884100	8
chr1.1824601.1824900	33
chr1.182580601.182580900	17
chr1.182760301.182760600	35
chr1.182921101.182921400	2
chr1.182922301.182922600	1
chr1.183389101.183389400	6
chr1.183443701.183444000	2
chr1.1839301.1839600	1
chr1.1841401.1841700	24
chr1.18434701.18435000	1
chr1.18448501.18448800	1
chr1.184725601.184725900	7
chr1.1848001.1848300	1
chr1.184924801.184925100	6
chr1.1849501.1849800	7
chr1.185016901.185017200	2
chr1.1851901.1852200	1
chr1.1852501.1852800	14
chr1.1860601.1860900	1
chr1.1861201.1861500	2
chr1.186346801.186347100	7
chr1.18690901.18691200	2
chr1.18692101.18692400	5
chr1.186975901.186976200	18
chr1.18807301.18807600	21
chr1.18808501.18808800	23
chr1.1887301.1887600	1
chr1.1887601.1887900	9
chr1.1888201.1888500	3
chr1.1888501.1888800	1
chr1.1895101.1895400	3
chr1.19044901.19045200	5
chr1.1908601.1908900	2
chr1.1909801.1910100	1
chr1.1913701.1914000	2
chr1.19205701.19206000	2
chr1.192469501.192469800	2
chr1.192583201.192583500	2
chr1.192778801.192779100	88
chr1.19285201.19285500	5
chr1.19336501.19336800	3
chr1.1935601.1935900	3
chr1.19360201.19360500	1
chr1.1936201.1936500	1
chr1.1936801.1937100	1
chr1.1949701.1950000	4
chr1.1951801.1952100	4
chr1.1952701.1953000	6
chr1.1954801.1955100	5
chr1.19579201.19579500	2
chr1.1959001.1959300	1
chr1.19601701.19602000	2
chr1.1960801.1961100	1
chr1.1962901.1963200	2
chr1.1973101.1973400	70
chr1.1974901.1975200	1
chr1.197513701.197514000	1
chr1.1977001.1977300	2
chr1.19779001.19779300	5
chr1.198123601.198123900	4
chr1.19813801.19814100	3
chr1.198648601.198648900	13
chr1.1991401.1991700	11
chr1.1992001.1992300	2
chr1.1992901.1993200	1
chr1.19969201.19969500	3
chr1.19989901.19990200	1
chr1.19992901.19993200	1
chr1.200005501.200005800	1
chr1.200116201.200116500	3
chr1.200381101.200381400	4
chr1.2004001.2004300	2
chr1.2005801.2006100	20
chr1.200591701.200592000	1
chr1.200636401.200636700	1
chr1.200637301.200637600	4
chr1.2006401.2006700	1
chr1.2007301.2007600	23
chr1.200840101.200840400	3
chr1.200841601.200841900	17
chr1.200842501.200842800	14
chr1.200843101.200843400	2
chr1.200968201.200968500	1
chr1.200968801.200969100	2
chr1.200969101.200969400	68
chr1.200969401.200969700	5
chr1.200970001.200970300	1
chr1.201140701.201141000	3
chr1.201195901.201196200	1
chr1.201196201.201196500	1
chr1.201197401.201197700	7
chr1.20124001.20124300	3
chr1.20124301.20124600	42
chr1.201244501.201244800	1
chr1.201253201.201253500	10
chr1.201253501.201253800	1
chr1.201435301.201435600	1
chr1.201437101.201437400	1
chr1.201463801.201464100	3
chr1.201618301.201618600	1
chr1.201619201.201619500	4
chr1.201924001.201924300	2
chr1.201927001.201927300	5
chr1.20207701.20208000	3
chr1.202077601.202077900	1
chr1.2027701.2028000	2
chr1.2028001.2028300	7
chr1.202829701.202830000	1
chr1.202856401.202856700	123
chr1.202856701.202857000	1
chr1.202897501.202897800	2
chr1.202978801.202979100	16
chr1.202996801.202997100	10
chr1.203061901.203062200	1
chr1.203097601.203097900	1
chr1.203097901.203098200	4
chr1.203455801.203456100	2
chr1.203524801.203525100	3
chr1.203735401.203735700	6
chr1.203832601.203832900	1
chr1.203869801.203870100	9
chr1.204058201.204058500	1
chr1.2040901.2041200	26
chr1.204228601.204228900	1
chr1.2042401.2042700	1
chr1.204254701.204255000	2
chr1.204381301.204381600	2
chr1.204382801.204383100	2
chr1.204652201.204652500	44
chr1.204684301.204684600	43
chr1.2047501.2047800	34
chr1.204949501.204949800	2
chr1.204951301.204951600	1
chr1.204961801.204962100	5
chr1.204975901.204976200	2
chr1.205038901.205039200	5
chr1.205039201.205039500	2
chr1.205041001.205041300	21
chr1.205289401.205289700	2
chr1.205314601.205314900	3
chr1.205413301.205413600	2
chr1.205710001.205710300	1
chr1.205721101.205721400	130
chr1.205819201.205819500	4
chr1.206221501.206221800	1
chr1.206222401.206222700	4
chr1.2063701.2064000	3
chr1.2066701.2067000	6
chr1.206683201.206683500	29
chr1.206844001.206844300	10
chr1.206966401.206966700	11
chr1.207080101.207080400	9
chr1.207080701.207081000	5
chr1.207081001.207081300	2
chr1.207083701.207084000	2
chr1.207227401.207227700	1
chr1.207492301.207492600	1
chr1.207818401.207818700	2
chr1.208040701.208041000	12
chr1.2082601.2082900	3
chr1.208389001.208389300	23
chr1.208419601.208419900	2
chr1.20958601.20958900	1
chr1.209799301.209799600	1
chr1.209832901.209833200	1
chr1.209841601.209841900	3
chr1.20989201.20989500	1
chr1.20989501.20989800	14
chr1.209919301.209919600	8
chr1.210002101.210002400	1
chr1.210002701.210003000	8
chr1.21041701.21042000	2
chr1.21043201.21043500	1
chr1.21045901.21046200	19
chr1.21056101.21056400	25
chr1.21057301.21057600	1
chr1.21061201.21061500	1
chr1.211380301.211380600	4
chr1.211430401.211430700	2
chr1.211434901.211435200	27
chr1.211435201.211435500	1
chr1.211499101.211499400	1
chr1.211501501.211501800	9
chr1.211650601.211650900	25
chr1.211652401.211652700	2
chr1.211662901.211663200	16
chr1.2116801.2117100	5
chr1.211686301.211686600	3
chr1.211689301.211689600	1
chr1.211713001.211713300	12
chr1.211849501.211849800	2
chr1.211849801.211850100	1
chr1.2119501.2119800	13
chr1.2119801.2120100	3
chr1.2123401.2123700	8
chr1.212456101.212456400	2
chr1.212672101.212672400	11
chr1.212870401.212870700	3
chr1.213029401.213029700	1
chr1.213083401.213083700	9
chr1.213088201.213088500	1
chr1.213090301.213090600	1
chr1.213152701.213153000	2
chr1.213223201.213223500	20
chr1.213561901.213562200	7
chr1.213562801.213563100	1
chr1.2138701.2139000	1
chr1.2140201.2140500	1
chr1.2143801.2144100	12
chr1.2145001.2145300	3
chr1.214779601.214779900	2
chr1.214781401.214781700	2
chr1.21504001.21504300	1
chr1.215043901.215044200	1
chr1.215044801.215045100	3
chr1.21550501.21550800	2
chr1.215738401.215738700	9
chr1.2157901.2158200	2
chr1.2161201.2161500	1
chr1.2162701.2163000	8
chr1.2163001.2163300	3
chr1.21655501.21655800	7
chr1.21672601.21672900	9
chr1.21672901.21673200	27
chr1.217306201.217306500	10
chr1.21757201.21757500	1
chr1.21757801.21758100	8
chr1.21762901.21763200	14
chr1.21765601.21765900	96
chr1.218666101.218666400	5
chr1.21929701.21930000	3
chr1.21931201.21931500	19
chr1.219632401.219632700	2
chr1.21976801.21977100	3
chr1.21978901.21979200	4
chr1.21985501.21985800	18
chr1.21993001.21993300	1
chr1.220099201.220099500	8
chr1.220101001.220101300	1
chr1.220220401.220220700	1
chr1.220394101.220394400	26
chr1.220510501.220510800	6
chr1.2209801.2210100	1
chr1.2210401.2210700	7
chr1.221057701.221058000	2
chr1.221058301.221058600	1
chr1.221063101.221063400	12
chr1.221069101.221069400	4
chr1.22149301.22149600	11
chr1.22149601.22149900	19
chr1.22154401.22154700	2
chr1.22155301.22155600	6
chr1.22157401.22157700	2
chr1.22189201.22189500	4
chr1.22211701.22212000	23
chr1.22213801.22214100	1
chr1.22214101.22214400	2
chr1.22231501.22231800	6
chr1.2223301.2223600	2
chr1.222789901.222790200	1
chr1.222883201.222883500	1
chr1.223255501.223255800	2
chr1.223256401.223256700	1
chr1.223257001.223257300	1
chr1.223356601.223356900	22
chr1.223566901.223567200	1
chr1.223567501.223567800	5
chr1.2236201.2236500	2
chr1.2237101.2237400	1
chr1.2237401.2237700	1
chr1.22380601.22380900	4
chr1.223934401.223934700	15
chr1.224034901.224035200	1
chr1.2240401.2240700	1
chr1.224182201.224182500	2
chr1.224300101.224300400	4
chr1.224368501.224368800	1
chr1.224369701.224370000	6
chr1.22444801.22445100	2
chr1.22455301.22455600	1
chr1.22455901.22456200	9
chr1.2247301.2247600	1
chr1.2249101.2249400	26
chr1.224924701.224925000	37
chr1.2249701.2250000	13
chr1.225661501.225661800	1
chr1.225867301.225867600	1
chr1.2259901.2260200	1
chr1.225995401.225995700	1
chr1.225997201.225997500	1
chr1.226014301.226014600	9
chr1.226072201.226072500	2
chr1.226074301.226074600	2
chr1.22611901.22612200	8
chr1.22612201.22612500	16
chr1.226126801.226127100	1
chr1.226188301.226188600	3
chr1.226269001.226269300	4
chr1.226271401.226271700	2
chr1.226296301.226296600	5
chr1.226315201.226315500	3
chr1.226366201.226366500	1
chr1.226376701.226377000	9
chr1.226409401.226409700	4
chr1.226412401.226412700	5
chr1.2265901.2266200	2
chr1.22670101.22670400	1
chr1.226829701.226830000	20
chr1.226830901.226831200	13
chr1.226891501.226891800	4
chr1.22692001.22692300	1
chr1.227129401.227129700	2
chr1.227162401.227162700	1
chr1.227163301.227163600	1
chr1.227163601.227163900	1
chr1.227164801.227165100	2
chr1.227681101.227681400	1
chr1.227681701.227682000	1
chr1.227682901.227683200	1
chr1.227696401.227696700	1
chr1.227729701.227730000	4
chr1.227747101.227747400	1
chr1.227752201.227752500	1
chr1.2277601.2277900	1
chr1.22778101.22778400	1
chr1.2277901.2278200	7
chr1.22779601.22779900	2
chr1.2278201.2278500	2
chr1.227920801.227921100	1
chr1.227921401.227921700	1
chr1.227973001.227973300	4
chr1.227973601.227973900	1
chr1.227977801.227978100	3
chr1.228003601.228003900	24
chr1.228075301.228075600	1
chr1.228077701.228078000	12
chr1.228110701.228111000	5
chr1.228159601.228159900	1
chr1.228160801.228161100	4
chr1.228288001.228288300	1
chr1.228288301.228288600	2
chr1.22829101.22829400	46
chr1.228327001.228327300	11
chr1.228327301.228327600	2
chr1.228338101.228338400	2
chr1.228338401.228338700	2
chr1.228360601.228360900	1
chr1.228363001.228363300	3
chr1.228363601.228363900	6
chr1.228364201.228364500	11
chr1.228398401.228398700	1
chr1.228406801.228407100	2
chr1.228459601.228459900	8
chr1.228461401.228461700	3
chr1.228464701.228465000	7
chr1.228466501.228466800	5
chr1.228473401.228473700	1
chr1.228475201.228475500	12
chr1.228475801.228476100	1
chr1.228505201.228505500	16
chr1.228507601.228507900	28
chr1.228510901.228511200	2
chr1.228558001.228558300	18
chr1.228560701.228561000	2
chr1.228582601.228582900	7
chr1.228602101.228602400	6
chr1.228606001.228606300	2
chr1.22863301.22863600	10
chr1.228647401.228647700	2
chr1.228672601.228672900	2
chr1.228673201.228673500	1
chr1.228742201.228742500	1
chr1.228754801.228755100	2
chr1.228761401.228761700	1
chr1.228764401.228764700	1
chr1.228765901.228766200	1
chr1.228766201.228766500	1
chr1.228767401.228767700	1
chr1.228769801.228770100	2
chr1.228772501.228772800	1
chr1.228778501.228778800	1
chr1.228786001.228786300	9
chr1.228890401.228890700	50
chr1.22900801.22901100	1
chr1.22904701.22905000	2
chr1.229210501.229210800	11
chr1.22925101.22925400	2
chr1.22925401.22925700	6
chr1.22926301.22926600	1
chr1.22926601.22926900	1
chr1.22928101.22928400	19
chr1.22928701.22929000	2
chr1.229544101.229544400	1
chr1.229545001.229545300	14
chr1.229567801.229568100	1
chr1.229644601.229644900	4
chr1.229696201.229696500	5
chr1.229730101.229730400	2
chr1.22973701.22974000	8
chr1.229759201.229759500	2
chr1.229759501.229759800	2
chr1.23003701.23004000	9
chr1.23005501.23005800	5
chr1.230241301.230241600	3
chr1.230250001.230250300	9
chr1.230259001.230259300	3
chr1.2303101.2303400	1
chr1.23038801.23039100	6
chr1.230407501.230407800	26
chr1.230415601.230415900	22
chr1.2304301.2304600	3
chr1.230468701.230469000	2
chr1.230469301.230469600	2
chr1.230493301.230493600	4
chr1.230493901.230494200	3
chr1.230776501.230776800	1
chr1.231006001.231006300	1
chr1.231006301.231006600	30
chr1.231036901.231037200	2
chr1.231378901.231379200	1
chr1.2314501.2314800	3
chr1.231474901.231475200	1
chr1.231666001.231666300	53
chr1.231666301.231666600	73
chr1.2318701.2319000	3
chr1.232356301.232356600	14
chr1.2325301.2325600	1
chr1.23278201.23278500	5
chr1.23282401.23282700	2
chr1.233123401.233123700	22
chr1.2332201.2332500	1
chr1.2332501.2332800	4
chr1.2332801.2333100	2
chr1.2333401.2333700	2
chr1.23343601.23343900	2
chr1.23343901.23344200	2
chr1.233464801.233465100	11
chr1.233465401.233465700	5
chr1.23348101.23348400	83
chr1.233497501.233497800	1
chr1.233497801.233498100	5
chr1.2340301.2340600	9
chr1.2341501.2341800	1
chr1.2343001.2343300	2
chr1.234559201.234559500	1
chr1.234559501.234559800	2
chr1.2346301.2346600	5
chr1.2346601.2346900	1
chr1.234669001.234669300	7
chr1.234680401.234680700	1
chr1.234792901.234793200	9
chr1.234852301.234852600	1
chr1.234881401.234881700	50
chr1.23503201.23503500	2
chr1.235242301.235242600	3
chr1.235267201.235267500	5
chr1.235289701.235290000	1
chr1.235322401.235322700	1
chr1.235326301.235326600	7
chr1.235326601.235326900	1
chr1.235804801.235805100	8
chr1.235805401.235805700	88
chr1.235815301.235815600	6
chr1.2358901.2359200	5
chr1.236032501.236032800	2
chr1.236155501.236155800	54
chr1.236156701.236157000	2
chr1.236231101.236231400	2
chr1.236442901.236443200	5
chr1.236447101.236447400	6
chr1.236511001.236511300	1
chr1.236848201.236848500	1
chr1.236848801.236849100	31
chr1.236856901.236857200	1
chr1.236961001.236961300	1
chr1.2369701.2370000	2
chr1.23762401.23762700	15
chr1.237634201.237634500	21
chr1.23809201.23809500	1
chr1.238106401.238106700	2
chr1.2386801.2387100	30
chr1.2387101.2387400	7
chr1.2388301.2388600	1
chr1.23894101.23894400	1
chr1.2389501.2389800	3
chr1.23947201.23947500	4
chr1.23947501.23947800	1
chr1.2396701.2397000	1
chr1.2400601.2400900	5
chr1.240160501.240160800	6
chr1.24016501.24016800	4
chr1.240370801.240371100	1
chr1.240371101.240371400	105
chr1.240371401.240371700	6
chr1.240371701.240372000	83
chr1.240372901.240373200	27
chr1.240568501.240568800	17
chr1.240569101.240569400	14
chr1.240655201.240655500	1
chr1.240655501.240655800	2
chr1.240656101.240656400	1
chr1.240657001.240657300	4
chr1.24072601.24072900	1
chr1.2409301.2409600	15
chr1.2409601.2409900	2
chr1.240987601.240987900	2
chr1.2409901.2410200	1
chr1.24104101.24104400	6
chr1.24107101.24107400	1
chr1.24116401.24116700	2
chr1.24118801.24119100	3
chr1.2415901.2416200	2
chr1.241696201.241696500	24
chr1.2417401.2417700	8
chr1.242013301.242013600	1
chr1.24228001.24228300	1
chr1.242609701.242610000	2
chr1.242690401.242690700	14
chr1.243264601.243264900	7
chr1.243265201.243265500	3
chr1.2433601.2433900	1
chr1.2435401.2435700	1
chr1.2436301.2436600	1
chr1.243637501.243637800	1
chr1.243638101.243638400	3
chr1.243638401.243638700	1
chr1.243649501.243649800	49
chr1.243649801.243650100	1
chr1.243651001.243651300	7
chr1.243652201.243652500	13
chr1.2437501.2437800	1
chr1.2439001.2439300	1
chr1.2439301.2439600	1
chr1.244142701.244143000	6
chr1.2442001.2442300	1
chr1.244439401.244439700	4
chr1.244467601.244467900	6
chr1.244532701.244533000	1
chr1.244617001.244617300	2
chr1.2446201.2446500	9
chr1.244626601.244626900	2
chr1.2446501.2446800	1
chr1.2448601.2448900	1
chr1.2449501.2449800	2
chr1.245130901.245131200	14
chr1.245196001.245196300	3
chr1.245315401.245315700	2
chr1.2454301.2454600	2
chr1.245544001.245544300	4
chr1.245742901.245743200	1
chr1.245751301.245751600	2
chr1.245752501.245752800	2
chr1.245810701.245811000	27
chr1.245848801.245849100	4
chr1.245851201.245851500	1
chr1.2459401.2459700	1
chr1.246138001.246138300	2
chr1.246138301.246138600	3
chr1.246138901.246139200	39
chr1.246415801.246416100	3
chr1.246592201.246592500	1
chr1.2466601.2466900	2
chr1.246672601.246672900	1
chr1.246783001.246783300	1
chr1.246783901.246784200	5
chr1.2468101.2468400	1
chr1.246948601.246948900	1
chr1.246952801.246953100	1
chr1.247093201.247093500	6
chr1.247170301.247170600	6
chr1.247274101.247274400	1
chr1.247277101.247277400	2
chr1.247279201.247279500	3
chr1.247465801.247466100	1
chr1.247492201.247492500	11
chr1.247539901.247540200	3
chr1.247614601.247614900	11
chr1.247615201.247615500	9
chr1.247615801.247616100	4
chr1.24861601.24861900	4
chr1.249106501.249106800	7
chr1.249140101.249140400	1
chr1.249141901.249142200	4
chr1.249165301.249165600	1
chr1.249169201.249169500	8
chr1.249169501.249169800	3
chr1.25011601.25011900	2
chr1.25069201.25069500	1
chr1.25069501.25069800	158
chr1.25070701.25071000	97
chr1.25073401.25073700	11
chr1.2515201.2515500	10
chr1.25198201.25198500	8
chr1.2520301.2520600	111
chr1.25228501.25228800	1
chr1.25229401.25229700	3
chr1.25230601.25230900	1
chr1.25236601.25236900	2
chr1.25236901.25237200	9
chr1.25246801.25247100	1
chr1.25250101.25250400	1
chr1.25254001.25254300	27
chr1.2525401.2525700	7
chr1.25257301.25257600	6
chr1.25260001.25260300	1
chr1.2526601.2526900	1
chr1.2526901.2527200	14
chr1.2528701.2529000	57
chr1.2529001.2529300	110
chr1.25292401.25292700	3
chr1.25319401.25319700	1
chr1.2538901.2539200	1
chr1.2539801.2540100	19
chr1.25564501.25564800	61
chr1.25567801.25568100	3
chr1.25568101.25568400	1
chr1.2575501.2575800	1
chr1.26095801.26096100	1
chr1.26098501.26098800	3
chr1.26123701.26124000	1
chr1.26149201.26149500	2
chr1.26200201.26200500	1
chr1.26202601.26202900	1
chr1.26204101.26204400	5
chr1.26322901.26323200	2
chr1.26325001.26325300	5
chr1.26364001.26364300	12
chr1.26439901.26440200	1
chr1.26490901.26491200	7
chr1.26496901.26497200	2
chr1.26497201.26497500	6
chr1.26498101.26498400	1
chr1.26551201.26551500	5
chr1.26551501.26551800	3
chr1.26553301.26553600	27
chr1.26616301.26616600	16
chr1.26670901.26671200	11
chr1.26685901.26686200	3
chr1.26688301.26688600	1
chr1.26826001.26826300	2
chr1.26828401.26828700	2
chr1.2707501.2707800	2
chr1.2708401.2708700	4
chr1.27143701.27144000	2
chr1.27144001.27144300	1
chr1.27144301.27144600	2
chr1.27152101.27152400	1
chr1.27152401.27152700	4
chr1.2715601.2715900	2
chr1.27189601.27189900	1
chr1.27228001.27228300	1
chr1.27333001.27333300	2
chr1.27340201.27340500	26
chr1.27353401.27353700	2
chr1.27482401.27482700	1
chr1.27526201.27526500	30
chr1.27528001.27528300	2
chr1.27675301.27675600	1
chr1.27675601.27675900	2
chr1.27676201.27676500	26
chr1.27676501.27676800	1
chr1.27677701.27678000	1
chr1.27678001.27678300	4
chr1.27684601.27684900	1
chr1.27685501.27685800	163
chr1.27687001.27687300	5
chr1.27687601.27687900	3
chr1.27689701.27690000	4
chr1.27690601.27690900	1
chr1.27690901.27691200	34
chr1.2770201.2770500	7
chr1.27708001.27708300	4
chr1.2770801.2771100	1
chr1.27720001.27720300	1
chr1.27720601.27720900	23
chr1.2773501.2773800	3
chr1.2777101.2777400	32
chr1.2777701.2778000	29
chr1.2778001.2778300	1
chr1.27817501.27817800	5
chr1.27818101.27818400	2
chr1.27875101.27875400	20
chr1.27896701.27897000	3
chr1.27939901.27940200	2
chr1.27940501.27940800	28
chr1.27984601.27984900	3
chr1.27993901.27994200	2
chr1.27994501.27994800	1
chr1.28098301.28098600	33
chr1.28216801.28217100	1
chr1.28239601.28239900	1
chr1.2826901.2827200	1
chr1.28284901.28285200	10
chr1.2829601.2829900	13
chr1.28440901.28441200	6
chr1.28495501.28495800	1
chr1.2849701.2850000	1
chr1.28558201.28558500	2
chr1.28571701.28572000	5
chr1.28572001.28572300	2
chr1.28588801.28589100	84
chr1.28641601.28641900	74
chr1.28654801.28655100	8
chr1.28694701.28695000	2
chr1.2878801.2879100	1
chr1.28842601.28842900	1
chr1.2884501.2884800	1
chr1.2885101.2885400	1
chr1.2886301.2886600	1
chr1.2887501.2887800	1
chr1.28880701.28881000	13
chr1.28881001.28881300	1
chr1.2888401.2888700	69
chr1.28919701.28920000	18
chr1.28920601.28920900	11
chr1.28920901.28921200	1
chr1.29061901.29062200	4
chr1.29064601.29064900	1
chr1.29065201.29065500	1
chr1.29103001.29103300	3
chr1.29139901.29140200	4
chr1.29189101.29189400	110
chr1.29189701.29190000	28
chr1.29239801.29240100	1
chr1.2929801.2930100	13
chr1.2937301.2937600	11
chr1.2938501.2938800	1
chr1.2939701.2940000	2
chr1.29446201.29446500	6
chr1.29447401.29447700	3
chr1.29458801.29459100	4
chr1.29460901.29461200	6
chr1.29509201.29509500	1
chr1.29583601.29583900	19
chr1.29584801.29585100	5
chr1.2977801.2978100	10
chr1.2980801.2981100	19
chr1.2989201.2989500	3
chr1.2992501.2992800	16
chr1.2998201.2998500	2
chr1.2999401.2999700	3
chr1.3000001.3000300	2
chr1.3026401.3026700	3
chr1.3029101.3029400	1
chr1.3029401.3029700	2
chr1.3038701.3039000	1
chr1.3055201.3055500	1
chr1.3058201.3058500	1
chr1.3058501.3058800	1
chr1.3071701.3072000	55
chr1.3073201.3073500	1
chr1.3101101.3101400	7
chr1.3104701.3105000	5
chr1.3105001.3105300	1
chr1.3111901.3112200	16
chr1.31190701.31191000	16
chr1.31192801.31193100	1
chr1.31193701.31194000	5
chr1.31238101.31238400	3
chr1.31247701.31248000	4
chr1.31248001.31248300	1
chr1.31279501.31279800	28
chr1.31279801.31280100	2
chr1.31379401.31379700	1
chr1.31382701.31383000	14
chr1.3146701.3147000	16
chr1.3149401.3149700	2
chr1.31540501.31540800	8
chr1.3155401.3155700	4
chr1.3157501.3157800	4
chr1.3159001.3159300	1
chr1.3159301.3159600	1
chr1.3159601.3159900	10
chr1.31625401.31625700	1
chr1.31626601.31626900	2
chr1.31626901.31627200	1
chr1.31629301.31629600	2
chr1.31629601.31629900	4
chr1.31630201.31630500	4
chr1.3163201.3163500	8
chr1.3164401.3164700	1
chr1.3180601.3180900	1
chr1.3180901.3181200	105
chr1.3181801.3182100	5
chr1.3186601.3186900	12
chr1.31887001.31887300	1
chr1.31904401.31904700	94
chr1.31904701.31905000	172
chr1.31905001.31905300	2
chr1.3193501.3193800	1
chr1.3194101.3194400	13
chr1.3195901.3196200	19
chr1.3204301.3204600	15
chr1.32051101.32051400	1
chr1.3205201.3205500	10
chr1.32052601.32052900	1
chr1.3205501.3205800	1
chr1.3205801.3206100	3
chr1.32171101.32171400	1
chr1.32207401.32207700	54
chr1.32208601.32208900	1
chr1.32221501.32221800	45
chr1.32237101.32237400	2
chr1.32256001.32256300	2
chr1.3229501.3229800	9
chr1.3239401.3239700	1
chr1.3240001.3240300	23
chr1.3241501.3241800	54
chr1.32477401.32477700	1
chr1.32481301.32481600	4
chr1.3251701.3252000	2
chr1.32536801.32537100	1
chr1.32646901.32647200	2
chr1.32647201.32647500	2
chr1.32647801.32648100	17
chr1.32705401.32705700	4
chr1.32709001.32709300	9
chr1.32714701.32715000	1
chr1.32741101.32741400	5
chr1.3276001.3276300	12
chr1.3279001.3279300	1
chr1.32815501.32815800	8
chr1.32816101.32816400	18
chr1.32824801.32825100	2
chr1.32829001.32829300	1
chr1.3297001.3297300	5
chr1.329701.330000	4
chr1.330001.330300	1
chr1.3304801.3305100	13
chr1.3309001.3309300	9
chr1.3309901.3310200	10
chr1.3310201.3310500	18
chr1.3310501.3310800	15
chr1.33114301.33114600	21
chr1.3311701.3312000	1
chr1.3320701.3321000	3
chr1.3321001.3321300	6
chr1.33218701.33219000	1
chr1.33219901.33220200	34
chr1.33220201.33220500	100
chr1.33236101.33236400	1
chr1.33236701.33237000	1
chr1.33237301.33237600	35
chr1.3327301.3327600	4
chr1.33281401.33281700	3
chr1.3332701.3333000	3
chr1.33353101.33353400	1
chr1.33353401.33353700	9
chr1.3341401.3341700	1
chr1.33428701.33429000	1
chr1.33429301.33429600	1
chr1.33439501.33439800	1
chr1.3349501.3349800	3
chr1.33516601.33516900	2
chr1.33516901.33517200	106
chr1.33517201.33517500	2
chr1.33525901.33526200	2
chr1.33545401.33545700	1
chr1.33622501.33622800	3
chr1.33625501.33625800	21
chr1.33716401.33716700	8
chr1.33720001.33720300	1
chr1.3373501.3373800	2
chr1.33774601.33774900	1
chr1.33939001.33939300	23
chr1.34089901.34090200	1
chr1.34091101.34091400	1
chr1.34091401.34091700	13
chr1.34092001.34092300	1
chr1.3421501.3421800	11
chr1.3423901.3424200	3
chr1.3426301.3426600	1
chr1.3428401.3428700	13
chr1.3428701.3429000	1
chr1.3433801.3434100	1
chr1.3434401.3434700	18
chr1.3435901.3436200	30
chr1.3445501.3445800	5
chr1.3446701.3447000	5
chr1.3449701.3450000	1
chr1.3457801.3458100	1
chr1.34643401.34643700	1
chr1.3499201.3499500	75
chr1.3499801.3500100	6
chr1.3500401.3500700	1
chr1.3501301.3501600	60
chr1.3501901.3502200	2
chr1.3513001.3513300	5
chr1.35245801.35246100	3
chr1.35250901.35251200	2
chr1.35258101.35258400	3
chr1.3525901.3526200	32
chr1.35260501.35260800	34
chr1.35330701.35331000	1
chr1.35334601.35334900	1
chr1.3538801.3539100	1
chr1.3543601.3543900	5
chr1.35440501.35440800	1
chr1.35442601.35442900	2
chr1.3555901.3556200	5
chr1.3562801.3563100	2
chr1.35659801.35660100	3
chr1.35660401.35660700	9
chr1.3570901.3571200	18
chr1.3571501.3571800	18
chr1.35735701.35736000	3
chr1.36038701.36039000	71
chr1.36040501.36040800	4
chr1.3605401.3605700	1
chr1.3607501.3607800	52
chr1.36107701.36108000	12
chr1.36108601.36108900	1
chr1.3621901.3622200	7
chr1.3624001.3624300	7
chr1.3625201.3625500	1
chr1.3632401.3632700	4
chr1.3647701.3648000	1
chr1.36553201.36553500	1
chr1.36553501.36553800	1
chr1.36590401.36590700	8
chr1.36591301.36591600	188
chr1.3661801.3662100	8
chr1.36642301.36642600	2
chr1.36644401.36644700	4
chr1.3664501.3664800	2
chr1.36715201.36715500	1
chr1.36715501.36715800	2
chr1.36769801.36770100	1
chr1.36773701.36774000	1
chr1.36774901.36775200	9
chr1.36785101.36785400	20
chr1.36787801.36788100	93
chr1.36805801.36806100	1
chr1.36815701.36816000	1
chr1.36849601.36849900	15
chr1.36861601.36861900	3
chr1.3686701.3687000	1
chr1.3691501.3691800	3
chr1.36916801.36917100	2
chr1.3702601.3702900	4
chr1.3711601.3711900	5
chr1.3714301.3714600	2
chr1.3727801.3728100	2
chr1.3771301.3771600	3
chr1.3772801.3773100	1
chr1.37783801.37784100	1
chr1.37784101.37784400	4
chr1.37978801.37979100	2
chr1.38021701.38022000	3
chr1.38022601.38022900	26
chr1.38024701.38025000	1
chr1.38060101.38060400	3
chr1.3807901.3808200	2
chr1.3808801.3809100	4
chr1.38102401.38102700	21
chr1.38158801.38159100	3
chr1.38220301.38220600	12
chr1.38257201.38257500	1
chr1.3826201.3826500	1
chr1.38272501.38272800	1
chr1.38272801.38273100	4
chr1.38456101.38456400	11
chr1.38459401.38459700	2
chr1.38461501.38461800	1
chr1.38461801.38462100	3
chr1.38463001.38463300	3
chr1.38513401.38513700	3
chr1.38514301.38514600	1
chr1.38573701.38574000	1
chr1.38922001.38922300	3
chr1.39323701.39324000	1
chr1.39545401.39545700	2
chr1.39981901.39982200	5
chr1.39982201.39982500	4
chr1.40039201.40039500	1
chr1.40043101.40043400	7
chr1.4005001.4005300	7
chr1.40107301.40107600	4
chr1.40149001.40149300	3
chr1.40205401.40205700	2
chr1.40350301.40350600	2
chr1.40350601.40350900	1
chr1.40350901.40351200	1
chr1.40597201.40597500	1
chr1.40767001.40767300	15
chr1.40770001.40770300	9
chr1.40770601.40770900	1
chr1.40779001.40779300	5
chr1.4079401.4079700	16
chr1.40943701.40944000	1
chr1.40972201.40972500	13
chr1.40975201.40975500	3
chr1.40976401.40976700	35
chr1.41114401.41114700	4
chr1.41116801.41117100	5
chr1.41132101.41132400	5
chr1.41281801.41282100	21
chr1.41301601.41301900	21
chr1.41304601.41304900	3
chr1.41349601.41349900	12
chr1.41483101.41483400	5
chr1.41824501.41824800	1
chr1.41825101.41825400	20
chr1.41887201.41887500	2
chr1.41889001.41889300	3
chr1.41891401.41891700	1
chr1.4192201.4192500	1
chr1.4194301.4194600	1
chr1.42164701.42165000	1
chr1.4221901.4222200	8
chr1.42272701.42273000	1
chr1.42844801.42845100	1
chr1.42921001.42921300	1
chr1.42921301.42921600	4
chr1.42923401.42923700	6
chr1.42923701.42924000	1
chr1.42927601.42927900	1
chr1.43204201.43204500	7
chr1.43206001.43206300	1
chr1.43250101.43250400	2
chr1.43250401.43250700	1
chr1.43252801.43253100	2
chr1.43352701.43353000	26
chr1.43354801.43355100	1
chr1.43400701.43401000	4
chr1.43402201.43402500	1
chr1.43405501.43405800	102
chr1.43422601.43422900	2
chr1.43473601.43473900	1
chr1.43535101.43535400	1
chr1.43772101.43772400	1
chr1.43815301.43815600	30
chr1.43823101.43823400	4
chr1.43826701.43827000	2
chr1.43830601.43830900	14
chr1.43834801.43835100	1
chr1.43835101.43835400	1
chr1.43835401.43835700	2
chr1.43917901.43918200	4
chr1.43997701.43998000	1
chr1.43998301.43998600	1
chr1.44029201.44029500	3
chr1.44030701.44031000	4
chr1.44031001.44031300	1
chr1.44031301.44031600	1
chr1.44032201.44032500	1
chr1.44055301.44055600	2
chr1.44055601.44055900	20
chr1.44061601.44061900	7
chr1.44070001.44070300	1
chr1.44073001.44073300	1
chr1.44115001.44115300	2
chr1.44381101.44381400	2
chr1.44401201.44401500	12
chr1.44411101.44411400	1
chr1.44438101.44438400	1
chr1.44447401.44447700	1
chr1.44569801.44570100	9
chr1.44821801.44822100	15
chr1.449401.449700	3
chr1.45082501.45082800	1
chr1.45099301.45099600	3
chr1.45120001.45120300	29
chr1.45189601.45189900	3
chr1.45189901.45190200	8
chr1.45207301.45207600	1
chr1.45240001.45240300	6
chr1.45240301.45240600	10
chr1.45247801.45248100	51
chr1.45249001.45249300	26
chr1.45263401.45263700	12
chr1.45269701.45270000	4
chr1.45279901.45280200	4
chr1.45283501.45283800	3
chr1.45286801.45287100	1
chr1.45287101.45287400	5
chr1.45307801.45308100	1
chr1.45308101.45308400	7
chr1.45450301.45450600	13
chr1.45771301.45771600	1
chr1.45791101.45791400	4
chr1.45804901.45805200	2
chr1.45963301.45963600	2
chr1.45989101.45989400	15
chr1.45990601.45990900	2
chr1.46087801.46088100	2
chr1.46088701.46089000	126
chr1.46089601.46089900	12
chr1.46215001.46215300	17
chr1.46215601.46215900	1
chr1.46267201.46267500	4
chr1.46631101.46631400	2
chr1.46667101.46667400	5
chr1.46705501.46705800	1
chr1.46706101.46706400	3
chr1.46706401.46706700	77
chr1.46765201.46765500	1
chr1.46770601.46770900	1
chr1.46805701.46806000	1
chr1.46858201.46858500	2
chr1.46860901.46861200	9
chr1.46934101.46934400	1
chr1.47080501.47080800	3
chr1.4713001.4713300	1
chr1.4726501.4726800	112
chr1.4726801.4727100	116
chr1.47488501.47488800	11
chr1.47694301.47694600	2
chr1.47694601.47694900	74
chr1.4770001.4770300	4
chr1.4772401.4772700	3
chr1.47782201.47782500	2
chr1.47899201.47899500	7
chr1.47909701.47910000	8
chr1.48000901.48001200	21
chr1.48024301.48024600	2
chr1.48057901.48058200	18
chr1.48224401.48224700	1
chr1.4830601.4830900	4
chr1.4832401.4832700	10
chr1.4834501.4834800	2
chr1.48458101.48458400	3
chr1.50489101.50489400	10
chr1.50490301.50490600	7
chr1.50879101.50879400	1
chr1.50879401.50879700	3
chr1.50881201.50881500	4
chr1.51312001.51312300	1
chr1.51808501.51808800	6
chr1.51810001.51810300	3
chr1.52455601.52455900	18
chr1.53069101.53069400	2
chr1.531001.531300	4
chr1.531901.532200	1
chr1.53391601.53391900	1
chr1.53542801.53543100	2
chr1.53546101.53546400	3
chr1.53703001.53703300	11
chr1.53740201.53740500	3
chr1.53742601.53742900	1
chr1.53794801.53795100	1
chr1.54127201.54127500	29
chr1.54205801.54206100	30
chr1.54412801.54413100	54
chr1.546301.546600	1
chr1.54723001.54723300	1
chr1.54726001.54726300	3
chr1.54765001.54765300	1
chr1.54807901.54808200	3
chr1.54856201.54856500	2
chr1.54856501.54856800	2
chr1.54925201.54925500	9
chr1.54965701.54966000	3
chr1.55009501.55009800	76
chr1.55246201.55246500	13
chr1.55268101.55268400	3
chr1.55272001.55272300	31
chr1.55413901.55414200	9
chr1.55461001.55461300	4
chr1.55753801.55754100	7
chr1.56941801.56942100	5
chr1.57024601.57024900	144
chr1.5770801.5771100	1
chr1.5771101.5771400	7
chr1.5772901.5773200	2
chr1.5773201.5773500	2
chr1.57892501.57892800	1
chr1.58627801.58628100	1
chr1.58716301.58716600	1
chr1.59010601.59010900	5
chr1.59042101.59042400	2
chr1.59368201.59368500	7
chr1.59370901.59371200	1
chr1.5937601.5937900	2
chr1.6034801.6035100	1
chr1.6049801.6050100	7
chr1.6054301.6054600	1
chr1.6132001.6132300	1
chr1.61509901.61510200	12
chr1.61579201.61579500	1
chr1.6186001.6186300	57
chr1.6186601.6186900	2
chr1.6187201.6187500	18
chr1.6200701.6201000	19
chr1.6203101.6203400	2
chr1.62056801.62057100	1
chr1.6208801.6209100	10
chr1.6209401.6209700	1
chr1.6209701.6210000	1
chr1.6210001.6210300	4
chr1.6210601.6210900	3
chr1.62120101.62120400	42
chr1.62189701.62190000	1
chr1.62191801.62192100	7
chr1.6242101.6242400	1
chr1.6242701.6243000	1
chr1.6243001.6243300	1
chr1.6263701.6264000	1
chr1.62659201.62659500	1
chr1.62659501.62659800	2
chr1.62660101.62660400	1
chr1.62662801.62663100	7
chr1.6268501.6268800	7
chr1.6270001.6270300	7
chr1.6270901.6271200	1
chr1.62751901.62752200	1
chr1.62785801.62786100	5
chr1.6307501.6307800	15
chr1.6307801.6308100	1
chr1.6312901.6313200	1
chr1.6313801.6314100	3
chr1.6315001.6315300	1
chr1.6315601.6315900	3
chr1.6318301.6318600	1
chr1.6322501.6322800	2
chr1.6336601.6336900	1
chr1.6338701.6339000	3
chr1.6359701.6360000	5
chr1.64937401.64937700	3
chr1.64972201.64972500	5
chr1.6510901.6511200	88
chr1.6512101.6512400	4
chr1.6514501.6514800	27
chr1.6518701.6519000	1
chr1.6521401.6521700	109
chr1.6528301.6528600	1
chr1.65292601.65292900	1
chr1.6530101.6530400	4
chr1.6532501.6532800	99
chr1.6543901.6544200	1
chr1.6548701.6549000	31
chr1.6559801.6560100	1
chr1.65611501.65611800	1
chr1.6566401.6566700	1
chr1.65718901.65719200	1
chr1.6612601.6612900	7
chr1.6615301.6615600	5
chr1.66257701.66258000	10
chr1.6654001.6654300	3
chr1.6654601.6654900	1
chr1.6665701.6666000	13
chr1.6687301.6687600	1
chr1.66999601.66999900	2
chr1.67460701.67461000	29
chr1.6762301.6762600	4
chr1.6764101.6764400	1
chr1.68299501.68299800	1
chr1.6842701.6843000	2
chr1.68513101.68513400	1
chr1.68515801.68516100	6
chr1.68627101.68627400	1
chr1.68960701.68961000	5
chr1.7021801.7022100	1
chr1.7121101.7121400	2
chr1.7122001.7122300	15
chr1.7313101.7313400	20
chr1.7490101.7490400	29
chr1.7558501.7558800	6
chr1.75590701.75591000	3
chr1.76262401.76262700	15
[truncated: 21,530 more rows]

## Sheet: 10_6_Normal
DMR	N_of_occurrence
chr1.100170001.100170300	3
chr1.1002901.1003200	2
chr1.100436701.100437000	4
chr1.100501501.100501800	6
chr1.100599301.100599600	2
chr1.1006801.1007100	73
chr1.10091401.10091700	3
chr1.10091701.10092000	66
chr1.10092001.10092300	3
chr1.100966201.100966500	4
chr1.1009801.1010100	8
chr1.1010401.1010700	10
chr1.1011001.1011300	1
chr1.1011301.1011600	198
chr1.1011601.1011900	10
chr1.1012801.1013100	2
chr1.1013101.1013400	1
chr1.1013401.1013700	126
chr1.1013701.1014000	71
chr1.1014001.1014300	99
chr1.1014301.1014600	1
chr1.1016101.1016400	25
chr1.10245601.10245900	1
chr1.10386001.10386300	1
chr1.1046401.1046700	2
chr1.1046701.1047000	6
chr1.1053001.1053300	71
chr1.1053301.1053600	13
chr1.10533601.10533900	3
chr1.10534501.10534800	80
chr1.10534801.10535100	1
chr1.10536901.10537200	6
chr1.10557301.10557600	20
chr1.10559401.10559700	1
chr1.1063801.1064100	8
chr1.10698901.10699200	16
chr1.10700101.10700400	1
chr1.10702201.10702500	54
chr1.1070401.1070700	11
chr1.10705801.10706100	1
chr1.10707001.10707300	1
chr1.10708201.10708500	1
chr1.10708501.10708800	1
chr1.10720201.10720500	1
chr1.10721401.10721700	12
chr1.10725001.10725300	1
chr1.10763701.10764000	53
chr1.10766701.10767000	1
chr1.10816201.10816500	11
chr1.10821301.10821600	1
chr1.10821601.10821900	1
chr1.108816301.108816600	22
chr1.108963901.108964200	4
chr1.109159501.109159800	23
chr1.109422001.109422300	1
chr1.109506301.109506600	63
chr1.109585801.109586100	90
chr1.109620001.109620300	1
chr1.109631101.109631400	1
chr1.109632601.109632900	3
chr1.109645201.109645500	19
chr1.1097401.1097700	2
chr1.109827601.109827900	1
chr1.109967701.109968000	5
chr1.110008201.110008500	3
chr1.1100401.1100700	4
chr1.110051401.110051700	1
chr1.110187001.110187300	40
chr1.110198101.110198400	1
chr1.110212501.110212800	6
chr1.11040001.11040300	1
chr1.110526001.110526300	6
chr1.1107301.1107600	1
chr1.11073601.11073900	1
chr1.110766301.110766600	2
chr1.110883001.110883300	3
chr1.1109701.1110000	1
chr1.111508201.111508500	11
chr1.1116601.1116900	4
chr1.111815701.111816000	18
chr1.112161601.112161900	12
chr1.112438801.112439100	4
chr1.112525501.112525800	6
chr1.112526401.112526700	3
chr1.11320801.11321100	11
chr1.11321401.11321700	1
chr1.113369101.113369400	1
chr1.113394001.113394300	1
chr1.113394301.113394600	2
chr1.113499301.113499600	1
chr1.113499601.113499900	1
chr1.113613301.113613600	2
chr1.113617201.113617500	1
chr1.113675401.113675700	15
chr1.1137301.1137600	15
chr1.113741701.113742000	1
chr1.1140301.1140600	16
chr1.1140601.1140900	8
chr1.1143001.1143300	17
chr1.1143301.1143600	3
chr1.114355501.114355800	3
chr1.114445801.114446100	3
chr1.1144501.1144800	1
chr1.1144801.1145100	10
chr1.115399501.115399800	1
chr1.11559601.11559900	2
chr1.11559901.11560200	5
chr1.11595301.11595600	4
chr1.1161001.1161300	2
chr1.116221801.116222100	2
chr1.1164001.1164300	4
chr1.1165501.1165800	16
chr1.116710201.116710500	3
chr1.117018001.117018300	3
chr1.1170601.1170900	1
chr1.117075601.117075900	53
chr1.117076801.117077100	1
chr1.11708401.11708700	2
chr1.1170901.1171200	15
chr1.11713201.11713500	15
chr1.11725201.11725500	1
chr1.11725501.11725800	1
chr1.117280801.117281100	1
chr1.1173301.1173600	4
chr1.1174201.1174500	9
chr1.1174801.1175100	5
chr1.1175101.1175400	1
chr1.11822701.11823000	2
chr1.1183201.1183500	3
chr1.1186201.1186500	2
chr1.1187701.1188000	8
chr1.1188601.1188900	1
chr1.11896201.11896500	6
chr1.11898301.11898600	4
chr1.11898601.11898900	2
chr1.11899501.11899800	3
chr1.1191001.1191300	22
chr1.119523301.119523600	35
chr1.119526301.119526600	114
chr1.119529901.119530200	1
chr1.11983801.11984100	4
chr1.11984401.11984700	1
chr1.11993401.11993700	1
chr1.11995801.11996100	22
chr1.11996701.11997000	2
chr1.1200901.1201200	5
chr1.120192301.120192600	2
chr1.120255901.120256200	5
chr1.1203901.1204200	1
chr1.12041401.12041700	4
chr1.120439201.120439500	1
chr1.12051001.12051300	3
chr1.1207201.1207500	3
chr1.12079201.12079500	14
chr1.12080701.12081000	1
chr1.12081001.12081300	47
chr1.12081301.12081600	1
chr1.121261501.121261800	18
chr1.12228301.12228600	1
chr1.12228901.12229200	3
chr1.12239101.12239400	2
chr1.12251101.12251400	2
chr1.12251401.12251700	7
chr1.1227601.1227900	2
chr1.1228201.1228500	2
chr1.1229101.1229400	1
chr1.12291601.12291900	12
chr1.12291901.12292200	58
chr1.1246501.1246800	12
chr1.1247701.1248000	16
chr1.1248001.1248300	1
chr1.1252201.1252500	2
chr1.12544201.12544500	4
chr1.1255501.1255800	1
chr1.12579001.12579300	22
chr1.12579301.12579600	1
chr1.12601501.12601800	1
chr1.1262401.1262700	4
chr1.1265101.1265400	2
chr1.1267501.1267800	2
chr1.1270501.1270800	1
chr1.12717901.12718200	23
chr1.1273201.1273500	6
chr1.1287301.1287600	16
chr1.1287601.1287900	3
chr1.1295401.1295700	3
chr1.1308001.1308300	1
chr1.1309501.1309800	1
chr1.1320601.1320900	2
chr1.1320901.1321200	37
chr1.1324201.1324500	2
chr1.132901.133200	8
chr1.1332301.1332600	26
chr1.133501.133800	1
chr1.133801.134100	1
chr1.1341301.1341600	3
chr1.135301.135600	34
chr1.1354501.1354800	1
chr1.1360201.1360500	1
chr1.13879201.13879500	7
chr1.1388701.1389000	19
chr1.1391401.1391700	14
chr1.13949701.13950000	4
chr1.1395001.1395300	1
chr1.1395301.1395600	2
chr1.1395901.1396200	19
chr1.1415101.1415400	5
chr1.1419901.1420200	15
chr1.1420201.1420500	4
chr1.142536301.142536600	2
chr1.142539001.142539300	3
chr1.142539301.142539600	160
chr1.142617901.142618200	1
chr1.142619101.142619400	3
chr1.142891501.142891800	17
chr1.142893001.142893300	2
chr1.143270401.143270700	1
chr1.143465101.143465400	1
chr1.143468401.143468700	3
chr1.143469301.143469600	1
chr1.143646901.143647200	1
chr1.143688001.143688300	12
chr1.144301201.144301500	2
chr1.144301501.144301800	1
chr1.144313201.144313500	2
chr1.1445401.1445700	1
chr1.144591601.144591900	6
chr1.144594901.144595200	5
chr1.1448101.1448400	3
chr1.1449901.1450200	35
chr1.145036201.145036500	1
chr1.145076101.145076400	2
chr1.145076401.145076700	80
chr1.145095601.145095900	1
chr1.1452301.1452600	3
chr1.145383301.145383600	4
chr1.145383601.145383900	1
chr1.145385401.145385700	5
chr1.145469101.145469400	1
chr1.145508701.145509000	2
chr1.145574401.145574700	10
chr1.145827601.145827900	1
chr1.145944001.145944300	1
chr1.145944301.145944600	2
chr1.145980301.145980600	2
chr1.146079301.146079600	3
chr1.146091601.146091900	14
chr1.146092801.146093100	1
chr1.1462801.1463100	9
chr1.146367601.146367900	2
chr1.146521501.146521800	3
chr1.146521801.146522100	11
chr1.146544001.146544300	2
chr1.146544301.146544600	14
chr1.146550001.146550300	4
chr1.146712901.146713200	1
chr1.1468501.1468800	1
chr1.1469101.1469400	1
chr1.1470301.1470600	11
chr1.1470901.1471200	1
chr1.147143101.147143400	7
chr1.147143401.147143700	3
chr1.147399601.147399900	1
chr1.147485701.147486000	1
chr1.147487501.147487800	17
chr1.147506101.147506400	3
chr1.147531601.147531900	3
chr1.1476001.1476300	1
chr1.147717001.147717300	1
chr1.147718501.147718800	4
chr1.1477201.1477500	72
chr1.147775801.147776100	17
chr1.147782401.147782700	20
chr1.147826201.147826500	1
chr1.1478401.1478700	4
chr1.147875401.147875700	1
chr1.148002001.148002300	6
chr1.148002301.148002600	37
chr1.148247401.148247700	12
chr1.148557301.148557600	1
chr1.148599601.148599900	1
chr1.148607401.148607700	1
chr1.148758601.148758900	1
chr1.148761901.148762200	115
chr1.148764601.148764900	91
chr1.148855501.148855800	1
chr1.148901701.148902000	2
chr1.1489501.1489800	1
chr1.149029201.149029500	9
chr1.149137201.149137500	1
chr1.149148301.149148600	13
chr1.149222401.149222700	1
chr1.149222701.149223000	2
chr1.149284801.149285100	4
chr1.149286301.149286600	6
chr1.149286601.149286900	1
chr1.149287501.149287800	37
chr1.149333101.149333400	26
chr1.149333701.149334000	11
chr1.149334001.149334300	14
chr1.149398501.149398800	3
chr1.149617801.149618100	1
chr1.149670301.149670600	4
chr1.149671201.149671500	3
chr1.149671501.149671800	2
chr1.149718301.149718600	1
chr1.149718901.149719200	7
chr1.149719501.149719800	10
chr1.149765401.149765700	1
chr1.149783401.149783700	1
chr1.149784301.149784600	4
chr1.1497901.1498200	1
chr1.149871601.149871900	16
chr1.149873701.149874000	1
chr1.149910901.149911200	4
chr1.149984101.149984400	1
chr1.150119701.150120000	1
chr1.150154501.150154800	33
chr1.150187801.150188100	5
chr1.150266701.150267000	15
chr1.150267301.150267600	1
chr1.150291601.150291900	2
chr1.150292801.150293100	31
chr1.150293401.150293700	1
chr1.150293701.150294000	1
chr1.150487201.150487500	1
chr1.150531001.150531300	1
chr1.1507501.1507800	5
chr1.150772501.150772800	1
chr1.1507801.1508100	1
chr1.150851101.150851400	57
chr1.150896701.150897000	10
chr1.150947701.150948000	1
chr1.151103101.151103400	3
chr1.151107601.151107900	1
chr1.1511101.1511400	1
chr1.151173001.151173300	36
chr1.151184701.151185000	2
chr1.151252201.151252500	3
chr1.15126301.15126600	9
chr1.15127201.15127500	10
chr1.15128401.15128700	61
chr1.151443601.151443900	7
chr1.151587001.151587300	1
chr1.151765201.151765500	1
chr1.152080201.152080500	46
chr1.152186101.152186400	1
chr1.152188801.152189100	1
chr1.15335701.15336000	9
chr1.1534201.1534500	18
chr1.153510001.153510300	1
chr1.153583501.153583800	3
chr1.1536001.1536300	4
chr1.153604801.153605100	1
chr1.153607501.153607800	12
chr1.153649501.153649800	2
chr1.153660301.153660600	1
chr1.1536901.1537200	1
chr1.153699601.153699900	18
chr1.153699901.153700200	1
chr1.153704401.153704700	2
chr1.15374101.15374400	1
chr1.15375301.15375600	20
chr1.153756901.153757200	17
chr1.15375901.15376200	3
chr1.153762301.153762600	9
chr1.153767701.153768000	1
chr1.15377401.15377700	1
chr1.153897301.153897600	1
chr1.153916501.153916800	1
chr1.153936901.153937200	3
chr1.153938401.153938700	4
chr1.153939001.153939300	2
chr1.153951901.153952200	94
chr1.153961201.153961500	1
chr1.154155601.154155900	2
chr1.154166101.154166400	1
chr1.154246801.154247100	5
chr1.154404901.154405200	9
chr1.154475101.154475400	46
chr1.154475701.154476000	1
chr1.154785901.154786200	3
chr1.154931701.154932000	21
chr1.154932301.154932600	1
chr1.154987801.154988100	1
chr1.154988701.154989000	1
chr1.154989001.154989300	2
chr1.154998001.154998300	1
chr1.155035201.155035500	5
chr1.155035501.155035800	10
chr1.155098201.155098500	2
chr1.155098501.155098800	1
chr1.155109001.155109300	3
chr1.155218501.155218800	5
chr1.155219101.155219400	22
chr1.1552201.1552500	1
chr1.155222701.155223000	2
chr1.155238301.155238600	6
chr1.155241901.155242200	1
chr1.155244601.155244900	2
chr1.155249701.155250000	5
chr1.155264701.155265000	138
chr1.155265301.155265600	2
chr1.155267401.155267700	15
chr1.1552801.1553100	64
chr1.155534101.155534400	1
chr1.155578801.155579100	18
chr1.155579101.155579400	1
chr1.155582101.155582400	20
chr1.155655901.155656200	1
chr1.155659501.155659800	3
chr1.1557001.1557300	1
chr1.1557601.1557900	1
chr1.156047101.156047400	1
chr1.156048901.156049200	2
chr1.156074101.156074400	40
chr1.156086701.156087000	3
chr1.156105601.156105900	2
chr1.156162301.156162600	3
chr1.156214201.156214500	1
chr1.156258901.156259200	2
chr1.156261001.156261300	31
chr1.156308701.156309000	8
chr1.156310201.156310500	25
chr1.156337501.156337800	2
chr1.156388201.156388500	4
chr1.156404701.156405000	1
chr1.1564501.1564800	2
chr1.156475201.156475500	5
chr1.156480601.156480900	1
chr1.156645001.156645300	1
chr1.156739501.156739800	33
chr1.1567801.1568100	6
chr1.156814501.156814800	1
chr1.156819001.156819300	2
chr1.156876301.156876600	1
chr1.157948801.157949100	100
chr1.1588801.1589100	1
chr1.159652501.159652800	5
chr1.159869101.159869400	4
chr1.159898201.159898500	1
chr1.160054501.160054800	145
chr1.160054801.160055100	2
chr1.16013401.16013700	2
chr1.160371901.160372200	13
chr1.160377901.160378200	1
chr1.16051501.16051800	1
chr1.16054201.16054500	19
chr1.16057201.16057500	1
chr1.16059601.16059900	7
chr1.16060501.16060800	1
chr1.1608601.1608900	3
chr1.160881001.160881300	1
chr1.161085901.161086200	16
chr1.161103901.161104200	9
chr1.161111701.161112000	8
chr1.161137801.161138100	2
chr1.161148901.161149200	2
chr1.161149201.161149500	1
chr1.16125301.16125600	1
chr1.161282701.161283000	1
chr1.161358901.161359200	30
chr1.161361301.161361600	2
chr1.161368501.161368800	1
chr1.161408701.161409000	4
chr1.161410501.161410800	2
chr1.161410801.161411100	1
chr1.161419801.161420100	6
chr1.161424001.161424300	1
chr1.161424901.161425200	5
chr1.161425501.161425800	92
chr1.161431501.161431800	1
chr1.161432701.161433000	2
chr1.161439601.161439900	1
chr1.161440801.161441100	7
chr1.161442601.161442900	2
chr1.161499301.161499600	1
chr1.16172101.16172400	9
chr1.16172701.16173000	1
chr1.16173001.16173300	3
chr1.161953201.161953500	1
chr1.161992201.161992500	3
chr1.1621801.1622100	2
chr1.16227601.16227900	10
chr1.162339001.162339300	1
chr1.162370501.162370800	1
chr1.162533401.162533700	1
chr1.1626901.1627200	4
chr1.16269301.16269600	1
chr1.16303501.16303800	9
chr1.16401001.16401300	1
chr1.16401601.16401900	2
chr1.1642801.1643100	5
chr1.1643101.1643400	1
chr1.16475701.16476000	11
chr1.16482901.16483200	2
chr1.16500301.16500600	1
chr1.165084901.165085200	1
chr1.16532101.16532400	6
chr1.165324601.165324900	2
chr1.16542301.16542600	1
chr1.16553701.16554000	5
chr1.16554001.16554300	1
chr1.16554301.16554600	3
chr1.16554901.16555200	1
chr1.165597601.165597900	5
chr1.16668901.16669200	5
chr1.166847401.166847700	1
chr1.166847701.166848000	5
chr1.1668901.1669200	2
chr1.1669501.1669800	1
chr1.166957201.166957500	13
chr1.167135701.167136000	1
chr1.1672501.1672800	7
chr1.167408701.167409000	5
chr1.167454001.167454300	5
chr1.167649301.167649600	2
chr1.1678801.1679100	2
chr1.16809301.16809600	5
chr1.168145801.168146100	1
chr1.16826101.16826400	1
chr1.16839001.16839300	3
chr1.1684201.1684500	1
chr1.16847101.16847400	2
chr1.16861501.16861800	5
chr1.1686301.1686600	25
chr1.1690501.1690800	2
chr1.1691101.1691400	1
chr1.169396501.169396800	1
chr1.16969201.16969500	117
chr1.16974001.16974300	46
chr1.16974301.16974600	25
chr1.16975801.16976100	9
chr1.16983601.16983900	10
chr1.16984801.16985100	8
chr1.17006401.17006700	2
chr1.17007001.17007300	59
chr1.17020801.17021100	39
chr1.17021401.17021700	3
chr1.17026801.17027100	1
chr1.17033701.17034000	3
chr1.17053501.17053800	1
chr1.170634901.170635200	3
chr1.17076601.17076900	1
chr1.17077501.17077800	4
chr1.17083801.17084100	3
chr1.17086501.17086800	1
chr1.171640501.171640800	3
chr1.17199901.17200200	15
chr1.17200201.17200500	9
chr1.17200801.17201100	1
chr1.17213401.17213700	1
chr1.17239501.17239800	1
chr1.172722001.172722300	46
chr1.17280601.17280900	3
chr1.17282701.17283000	1
chr1.17333401.17333700	12
chr1.173640601.173640900	7
chr1.173794501.173794800	2
chr1.173795101.173795400	1
chr1.173958601.173958900	19
chr1.173992801.173993100	7
chr1.173993401.173993700	1
chr1.17447401.17447700	68
chr1.17475901.17476200	73
chr1.175048201.175048500	1
chr1.175546801.175547100	2
chr1.175547101.175547400	2
chr1.17746201.17746500	7
chr1.17747701.17748000	11
chr1.17748301.17748600	1
chr1.17762101.17762400	18
chr1.178456801.178457100	12
chr1.178512601.178512900	38
chr1.178997401.178997700	29
chr1.179098801.179099100	1
chr1.179187301.179187600	2
chr1.179332501.179332800	3
chr1.17947501.17947800	5
chr1.17950201.17950500	17
chr1.179559901.179560200	1
chr1.179561101.179561400	1
chr1.179561401.179561700	2
chr1.17956201.17956500	3
chr1.179607001.179607300	1
chr1.179922301.179922600	1
chr1.180469501.180469800	1
chr1.180884101.180884400	2
chr1.181130401.181130700	4
chr1.181382101.181382400	8
chr1.1824601.1824900	6
chr1.182583601.182583900	23
chr1.182990101.182990400	5
chr1.182990401.182990700	10
chr1.1840801.1841100	1
chr1.1841401.1841700	3
chr1.1841701.1842000	1
chr1.18448801.18449100	9
chr1.1848001.1848300	5
chr1.1852501.1852800	5
chr1.185344501.185344800	1
chr1.1857901.1858200	1
chr1.186346801.186347100	3
chr1.18692101.18692400	1
chr1.186975901.186976200	14
chr1.18702901.18703200	5
chr1.18807901.18808200	3
chr1.18808501.18808800	24
chr1.1887301.1887600	1
chr1.1887901.1888200	1
chr1.1888201.1888500	34
chr1.1895101.1895400	1
chr1.1896001.1896300	1
chr1.18961801.18962100	1
chr1.189756301.189756600	1
chr1.1908001.1908300	1
chr1.1909801.1910100	3
chr1.19110601.19110900	1
chr1.1913401.1913700	4
chr1.1913701.1914000	22
chr1.1915501.1915800	1
chr1.19204201.19204500	4
chr1.19205701.19206000	2
chr1.192469501.192469800	1
chr1.192778501.192778800	19
chr1.192778801.192779100	4
chr1.19285201.19285500	1
chr1.193027201.193027500	25
chr1.193030801.193031100	9
chr1.193075801.193076100	9
chr1.19360201.19360500	14
chr1.1937101.1937400	1
chr1.1951801.1952100	5
chr1.1954801.1955100	4
chr1.1955401.1955700	2
chr1.1957201.1957500	1
chr1.19576201.19576500	1
chr1.19576501.19576800	3
chr1.1959301.1959600	10
chr1.19600501.19600800	8
chr1.19602601.19602900	1
chr1.1960801.1961100	3
chr1.19614001.19614300	2
chr1.19614901.19615200	1
chr1.1961701.1962000	1
chr1.1962901.1963200	1
chr1.19664101.19664400	3
chr1.19666501.19666800	7
chr1.196845901.196846200	4
chr1.1973101.1973400	19
chr1.19734901.19735200	3
chr1.197513701.197514000	29
chr1.19779001.19779300	1
chr1.197892301.197892600	12
chr1.19812901.19813200	1
chr1.1983001.1983300	3
chr1.198633901.198634200	3
chr1.1989601.1989900	2
chr1.1991401.1991700	9
chr1.1992301.1992600	3
chr1.19968601.19968900	1
chr1.19992901.19993200	43
chr1.200004901.200005200	2
chr1.20004901.20005200	5
chr1.200116501.200116800	1
chr1.2004301.2004600	3
chr1.2006401.2006700	90
chr1.2007001.2007300	44
chr1.200715901.200716200	2
chr1.200842501.200842800	19
chr1.200843101.200843400	30
chr1.200843701.200844000	44
chr1.200968801.200969100	2
chr1.200969101.200969400	24
chr1.201084001.201084300	2
chr1.20124301.20124600	50
chr1.201253201.201253500	70
chr1.201367801.201368100	1
chr1.201927001.201927300	2
chr1.20208301.20208600	1
chr1.202160701.202161000	1
chr1.202163701.202164000	10
chr1.202217101.202217400	3
chr1.2023801.2024100	1
chr1.2024401.2024700	1
chr1.202680601.202680900	1
chr1.202856401.202856700	37
chr1.202856701.202857000	19
chr1.202897501.202897800	8
chr1.203061901.203062200	1
chr1.203097901.203098200	7
chr1.203398201.203398500	1
chr1.203457901.203458200	1
chr1.203526601.203526900	23
chr1.203625001.203625300	1
chr1.203735401.203735700	8
chr1.203830501.203830800	2
chr1.204040201.204040500	7
chr1.2040901.2041200	1
chr1.2041201.2041500	1
chr1.2041501.2041800	3
chr1.204160801.204161100	1
chr1.204161101.204161400	1
chr1.204226201.204226500	1
chr1.204228301.204228600	29
chr1.2043301.2043600	2
chr1.204346501.204346800	1
chr1.204381901.204382200	8
chr1.204652201.204652500	59
chr1.204684301.204684600	42
chr1.2047501.2047800	1
chr1.204916201.204916500	1
chr1.204962101.204962400	46
chr1.205262701.205263000	4
chr1.205289401.205289700	6
chr1.205312201.205312500	14
chr1.205415701.205416000	1
chr1.205416001.205416300	2
chr1.205449601.205449900	4
chr1.205498201.205498500	3
chr1.205630801.205631100	1
chr1.205631701.205632000	1
chr1.205651501.205651800	23
chr1.20569501.20569800	3
chr1.205720801.205721100	1
chr1.205721101.205721400	15
chr1.205743601.205743900	17
chr1.205783801.205784100	17
chr1.205818901.205819200	21
chr1.2063701.2064000	18
chr1.206683201.206683500	1
chr1.206857501.206857800	1
chr1.206966401.206966700	70
chr1.207080701.207081000	8
chr1.207081301.207081600	1
chr1.207084001.207084300	1
chr1.207120301.207120600	10
chr1.207492301.207492600	2
chr1.2081401.2081700	2
chr1.2084401.2084700	1
chr1.209601001.209601300	10
chr1.20962201.20962500	3
chr1.209978701.209979000	1
chr1.210002101.210002400	21
chr1.21021301.21021600	1
chr1.21024601.21024900	1
chr1.21030601.21030900	23
chr1.21030901.21031200	4
chr1.21043201.21043500	6
chr1.210503401.210503700	1
chr1.21060901.21061200	3
chr1.210856501.210856800	1
chr1.211434901.211435200	23
chr1.211435201.211435500	25
chr1.2115001.2115300	2
chr1.211554901.211555200	2
chr1.2116501.2116800	1
chr1.211650601.211650900	47
chr1.211662901.211663200	16
chr1.2116801.2117100	1
chr1.211713001.211713300	23
chr1.2117701.2118000	3
chr1.2119501.2119800	4
chr1.212456101.212456400	1
chr1.212658001.212658300	5
chr1.212688001.212688300	21
chr1.212688901.212689200	13
chr1.212731201.212731500	3
chr1.212865001.212865300	1
chr1.212865301.212865600	1
chr1.212963701.212964000	15
chr1.213029101.213029400	2
chr1.213083401.213083700	1
chr1.213224101.213224400	5
chr1.213225901.213226200	1
chr1.213901501.213901800	2
chr1.214361401.214361700	13
chr1.214455901.214456200	1
chr1.2145001.2145300	1
chr1.214779601.214779900	5
chr1.214781701.214782000	45
chr1.215043601.215043900	17
chr1.21550501.21550800	1
chr1.21550801.21551100	5
chr1.215742301.215742600	6
chr1.2161201.2161500	1
chr1.21655501.21655800	132
chr1.21672601.21672900	16
chr1.217306201.217306500	1
chr1.21760801.21761100	1
chr1.21761101.21761400	1
chr1.21762901.21763200	4
chr1.218666101.218666400	1
chr1.21929701.21930000	4
chr1.21930301.21930600	3
chr1.21930601.21930900	22
chr1.21931201.21931500	1
chr1.21948301.21948600	12
chr1.22089001.22089300	2
chr1.220923901.220924200	1
chr1.221050501.221050800	15
chr1.221050801.221051100	7
chr1.221062201.221062500	43
chr1.221063101.221063400	3
chr1.22110601.22110900	1
chr1.22112101.22112400	2
chr1.22141801.22142100	3
chr1.22151101.22151400	1
chr1.22156201.22156500	2
chr1.22189201.22189500	31
chr1.22189501.22189800	1
chr1.221927701.221928000	3
chr1.22214101.22214400	2
chr1.22231501.22231800	1
chr1.222461701.222462000	2
chr1.222819601.222819900	5
chr1.222883501.222883800	52
chr1.2230501.2230800	8
chr1.2232301.2232600	1
chr1.223256401.223256700	1
chr1.223567501.223567800	9
chr1.223742701.223743000	12
chr1.22380601.22380900	5
chr1.223934401.223934700	8
chr1.223964401.223964700	45
chr1.224031001.224031300	1
chr1.2240701.2241000	1
chr1.224182201.224182500	1
chr1.224359501.224359800	4
chr1.224369701.224370000	2
chr1.224393101.224393400	16
chr1.224518801.224519100	7
chr1.224598001.224598300	1
chr1.224719501.224719800	1
chr1.2247301.2247600	2
chr1.2249101.2249400	32
chr1.224924701.224925000	7
chr1.2249401.2249700	2
chr1.2249701.2250000	2
chr1.225117901.225118200	19
chr1.225865201.225865500	2
chr1.2259601.2259900	8
chr1.2259901.2260200	1
chr1.226007101.226007400	11
chr1.226072201.226072500	9
chr1.226073401.226073700	22
chr1.226113601.226113900	8
chr1.22612201.22612500	1
chr1.22612501.22612800	1
chr1.226269601.226269900	1
chr1.226272601.226272900	1
chr1.226371901.226372200	2
chr1.226372501.226372800	4
chr1.226413001.226413300	6
chr1.2266201.2266500	1
chr1.226827301.226827600	17
chr1.226829701.226830000	19
chr1.226889101.226889400	92
chr1.226889401.226889700	3
chr1.226924201.226924500	3
chr1.227060701.227061000	2
chr1.227162701.227163000	1
chr1.227163301.227163600	2
chr1.227163601.227163900	1
chr1.227692201.227692500	26
chr1.227730601.227730900	4
chr1.227730901.227731200	2
chr1.22777201.22777500	1
chr1.22777801.22778100	1
chr1.22778101.22778400	1
chr1.2278201.2278500	1
chr1.227920801.227921100	1
chr1.227921401.227921700	21
chr1.227973001.227973300	5
chr1.227973601.227973900	2
chr1.228075301.228075600	9
chr1.228111901.228112200	1
chr1.228162301.228162600	2
chr1.228197701.228198000	1
chr1.228248701.228249000	3
chr1.228288301.228288600	6
chr1.22829101.22829400	16
chr1.228294601.228294900	5
chr1.228327001.228327300	6
chr1.228329701.228330000	1
chr1.228338101.228338400	13
chr1.228344401.228344700	7
chr1.228346801.228347100	6
chr1.228363001.228363300	1
chr1.228364201.228364500	45
chr1.228398701.228399000	4
chr1.228404101.228404400	1
chr1.228461701.228462000	1
chr1.228462001.228462300	5
chr1.228465301.228465600	1
chr1.228466201.228466500	2
chr1.228469801.228470100	1
chr1.228470401.228470700	2
chr1.228475201.228475500	5
chr1.228507601.228507900	14
chr1.228549001.228549300	3
chr1.228550201.228550500	2
chr1.228557701.228558000	24
chr1.228558601.228558900	1
chr1.228560701.228561000	3
chr1.228613501.228613800	1
chr1.228614101.228614400	22
chr1.22863301.22863600	4
chr1.228635401.228635700	46
chr1.228672601.228672900	1
chr1.228686101.228686400	139
chr1.228744001.228744300	1
chr1.228749101.228749400	1
chr1.228752701.228753000	2
chr1.228753901.228754200	1
chr1.228754801.228755100	1
chr1.228765901.228766200	2
chr1.228766201.228766500	1
chr1.228767401.228767700	1
chr1.228769501.228769800	1
chr1.228769801.228770100	1
chr1.228781201.228781500	1
chr1.22904101.22904400	4
chr1.22905301.22905600	20
chr1.22925101.22925400	25
chr1.22925401.22925700	6
chr1.22926901.22927200	6
chr1.22928101.22928400	4
chr1.22929001.22929300	2
chr1.229406401.229406700	74
chr1.229408201.229408500	10
chr1.229567801.229568100	5
chr1.229695601.229695900	1
chr1.229730101.229730400	10
chr1.22973701.22974000	45
chr1.23005501.23005800	5
chr1.2302201.2302500	57
chr1.230241301.230241600	1
chr1.230250001.230250300	5
chr1.2303101.2303400	19
chr1.23038801.23039100	8
chr1.230467801.230468100	1
chr1.231025501.231025800	1
chr1.23110801.23111100	17
chr1.231476101.231476400	3
chr1.2316601.2316900	2
chr1.231666001.231666300	61
chr1.231666301.231666600	5
chr1.2317801.2318100	1
chr1.2318401.2318700	21
chr1.23278201.23278500	2
chr1.23279401.23279700	3
chr1.2332201.2332500	1
chr1.2333101.2333400	1
chr1.2333401.2333700	1
chr1.23344201.23344500	1
chr1.233464801.233465100	3
chr1.233465401.233465700	7
chr1.23348101.23348400	72
chr1.233497501.233497800	1
chr1.233497801.233498100	1
chr1.2335201.2335500	1
chr1.2343001.2343300	2
chr1.234367201.234367500	1
chr1.234559201.234559500	4
chr1.234631501.234631800	3
chr1.234669001.234669300	8
chr1.234792601.234792900	2
chr1.234881401.234881700	4
chr1.234908701.234909000	23
chr1.234914101.234914400	1
chr1.235125901.235126200	1
chr1.235152001.235152300	13
chr1.235158301.235158600	3
chr1.235183801.235184100	1
chr1.235289701.235290000	2
chr1.235323301.235323600	2
chr1.235805401.235805700	260
chr1.235807201.235807500	3
chr1.235815301.235815600	1
chr1.2358901.2359200	6
chr1.2360701.2361000	5
chr1.2361001.2361300	4
chr1.236157601.236157900	1
chr1.2361901.2362200	3
chr1.236510701.236511000	1
chr1.236848201.236848500	1
chr1.236848801.236849100	18
chr1.23693401.23693700	6
chr1.2369701.2370000	1
chr1.23762101.23762400	6
chr1.23762401.23762700	13
chr1.23763601.23763900	16
chr1.237946801.237947100	4
chr1.2381101.2381400	1
chr1.2385601.2385900	1
chr1.2385901.2386200	19
chr1.2386801.2387100	48
chr1.23894401.23894700	2
chr1.23945101.23945400	1
chr1.23947201.23947500	3
chr1.240307801.240308100	2
chr1.240371101.240371400	232
chr1.240371401.240371700	63
chr1.240371701.240372000	26
chr1.240373201.240373500	2
chr1.240569101.240569400	182
chr1.240569401.240569700	1
chr1.240569701.240570000	27
chr1.240874201.240874500	1
chr1.24102601.24102900	1
chr1.24104101.24104400	21
chr1.2411701.2412000	1
chr1.2412901.2413200	4
chr1.2414701.2415000	1
chr1.242609701.242610000	9
chr1.242686801.242687100	7
chr1.24285001.24285300	3
chr1.243052801.243053100	1
chr1.2432101.2432400	27
chr1.243264601.243264900	49
chr1.243647101.243647400	4
chr1.243648001.243648300	20
chr1.243649501.243649800	3
chr1.243650101.243650400	1
chr1.243650401.243650700	1
chr1.243653701.243654000	48
chr1.2438101.2438400	3
chr1.244142401.244142700	7
chr1.2442001.2442300	1
chr1.244467601.244467900	23
chr1.244625101.244625400	28
chr1.2446801.2447100	2
chr1.244815301.244815600	1
chr1.244892101.244892400	13
chr1.244894201.244894500	13
chr1.245135401.245135700	4
chr1.24516901.24517200	1
chr1.24521401.24521700	1
chr1.2456401.2456700	2
chr1.245754601.245754900	18
chr1.245755201.245755500	1
chr1.245846401.245846700	1
chr1.245850301.245850600	2
chr1.245852401.245852700	8
chr1.246138001.246138300	88
chr1.246139201.246139500	1
chr1.246139801.246140100	1
chr1.246414601.246414900	1
chr1.246415801.246416100	1
chr1.246671401.246671700	1
chr1.246845101.246845400	2
chr1.246845401.246845700	1
chr1.2469001.2469300	14
chr1.246948601.246948900	1
chr1.246950101.246950400	1
chr1.247092601.247092900	2
chr1.247170601.247170900	2
chr1.2472601.2472900	10
chr1.247268401.247268700	34
chr1.247274101.247274400	2
chr1.247290601.247290900	7
chr1.247335001.247335300	11
chr1.24740701.24741000	8
chr1.24741601.24741900	4
chr1.247463701.247464000	1
chr1.247614601.247614900	5
chr1.247615801.247616100	3
chr1.247803001.247803300	2
chr1.248099401.248099700	2
chr1.248100601.248100900	9
chr1.24826801.24827100	1
chr1.24831601.24831900	1
chr1.249133801.249134100	1
chr1.249141901.249142200	5
chr1.249142201.249142500	1
chr1.249142801.249143100	12
chr1.249165301.249165600	6
chr1.249166801.249167100	2
chr1.249169201.249169500	11
chr1.249169501.249169800	3
chr1.24967801.24968100	3
chr1.25069501.25069800	12
chr1.25070701.25071000	8
chr1.2520301.2520600	84
chr1.25230601.25230900	1
chr1.25233601.25233900	1
chr1.25250101.25250400	27
chr1.25254001.25254300	4
chr1.2526601.2526900	1
chr1.2528701.2529000	79
chr1.2529001.2529300	94
chr1.25355101.25355400	1
chr1.25357501.25357800	8
chr1.25357801.25358100	2
chr1.2538001.2538300	1
chr1.2539801.2540100	1
chr1.2561101.2561400	1
chr1.2575801.2576100	1
chr1.26095801.26096100	1
chr1.26204401.26204700	25
chr1.26247901.26248200	1
chr1.26322601.26322900	9
chr1.26439601.26439900	1
chr1.26490901.26491200	8
chr1.26491201.26491500	85
chr1.26496901.26497200	18
chr1.26634601.26634900	2
chr1.26685901.26686200	1
chr1.26687101.26687400	1
chr1.26687701.26688000	2
chr1.27143701.27144000	1
chr1.27144001.27144300	1
chr1.27144601.27144900	20
chr1.27152401.27152700	2
chr1.2717101.2717400	1
chr1.2717401.2717700	2
chr1.27219001.27219300	1
chr1.27228301.27228600	2
chr1.27322201.27322500	1
chr1.27339901.27340200	2
chr1.27353401.27353700	16
chr1.27483001.27483300	17
chr1.27528001.27528300	3
chr1.27675901.27676200	1
chr1.27676201.27676500	5
chr1.27676501.27676800	2
chr1.27676801.27677100	6
chr1.27678001.27678300	1
chr1.27678901.27679200	1
chr1.27683701.27684000	44
chr1.27685501.27685800	8
chr1.27687301.27687600	3
chr1.27687601.27687900	1
chr1.27690901.27691200	28
chr1.2770801.2771100	1
chr1.27708901.27709200	1
chr1.2774401.2774700	3
chr1.2777701.2778000	30
chr1.27817801.27818100	1
chr1.27818101.27818400	1
chr1.27875101.27875400	2
chr1.27940501.27940800	26
chr1.27984601.27984900	3
chr1.27995401.27995700	2
chr1.28050901.28051200	23
chr1.28054201.28054500	9
chr1.28098301.28098600	12
chr1.28189501.28189800	38
chr1.28197301.28197600	3
chr1.2827201.2827500	4
chr1.28284901.28285200	5
chr1.28415401.28415700	18
chr1.28416301.28416600	6
chr1.2845801.2846100	2
chr1.2846701.2847000	3
chr1.2848201.2848500	1
chr1.2851501.2851800	4
chr1.28571701.28572000	5
chr1.28572001.28572300	3
chr1.28572301.28572600	14
chr1.28583701.28584000	1
chr1.2876701.2877000	3
chr1.28842601.28842900	8
chr1.2884501.2884800	25
chr1.28857001.28857300	1
chr1.2886301.2886600	5
chr1.2886601.2886900	1
chr1.2887501.2887800	1
chr1.28878001.28878300	1
chr1.28881001.28881300	2
chr1.28881601.28881900	3
chr1.2888401.2888700	125
chr1.28909501.28909800	3
chr1.28917001.28917300	10
chr1.28917601.28917900	2
chr1.28919701.28920000	19
chr1.28920001.28920300	13
chr1.28920601.28920900	15
chr1.29102701.29103000	4
chr1.29139901.29140200	2
chr1.2916901.2917200	4
chr1.2917801.2918100	1
chr1.29189101.29189400	38
chr1.29189401.29189700	16
chr1.2920201.2920500	2
chr1.2920501.2920800	18
chr1.2936401.2936700	3
chr1.29451601.29451900	8
chr1.29452501.29452800	6
chr1.29458801.29459100	5
chr1.29460301.29460600	17
chr1.29509201.29509500	4
chr1.29584801.29585100	53
chr1.2978701.2979000	8
chr1.29806801.29807100	2
chr1.2998501.2998800	1
chr1.2999401.2999700	1
chr1.3038401.3038700	3
chr1.3056701.3057000	2
chr1.3058501.3058800	4
chr1.3060301.3060600	1
chr1.3071701.3072000	4
chr1.3072001.3072300	20
chr1.3074101.3074400	5
chr1.3100501.3100800	6
chr1.3103201.3103500	1
chr1.3107101.3107400	4
chr1.3111901.3112200	2
chr1.31220701.31221000	1
chr1.31221301.31221600	6
chr1.31239001.31239300	6
chr1.31247401.31247700	1
chr1.31279501.31279800	10
chr1.3134101.3134400	4
chr1.31379401.31379700	1
chr1.3146401.3146700	4
chr1.3149401.3149700	6
chr1.31540501.31540800	4
chr1.3154201.3154500	1
chr1.3155401.3155700	5
chr1.3164101.3164400	3
chr1.3164401.3164700	9
chr1.3180601.3180900	5
chr1.3180901.3181200	50
chr1.3186301.3186600	9
chr1.3186601.3186900	3
chr1.31887001.31887300	1
chr1.31904401.31904700	530
chr1.31904701.31905000	279
chr1.31905001.31905300	2
chr1.3193501.3193800	1
chr1.3193801.3194100	1
chr1.3194101.3194400	41
chr1.3197401.3197700	2
chr1.3201901.3202200	2
chr1.3203701.3204000	1
chr1.3204301.3204600	110
chr1.3205201.3205500	11
chr1.32052301.32052600	2
chr1.3205501.3205800	1
chr1.32055601.32055900	1
chr1.32055901.32056200	2
chr1.32081701.32082000	9
chr1.32182201.32182500	1
chr1.32206801.32207100	3
chr1.32207401.32207700	15
chr1.32208301.32208600	2
chr1.32209801.32210100	2
chr1.32221501.32221800	1
chr1.3227401.3227700	1
chr1.3229501.3229800	13
chr1.3239401.3239700	28
chr1.3239701.3240000	2
chr1.32405101.32405400	2
chr1.3241201.3241500	1
chr1.3241501.3241800	10
chr1.3251701.3252000	20
chr1.32688901.32689200	42
chr1.3269101.3269400	14
chr1.32705401.32705700	7
chr1.32738701.32739000	4
chr1.32742601.32742900	1
chr1.3279301.3279600	7
chr1.32815501.32815800	1
chr1.32815801.32816100	8
chr1.32816101.32816400	6
chr1.32829001.32829300	1
chr1.32928601.32928900	4
chr1.330001.330300	1
chr1.33003601.33003900	1
chr1.3305101.3305400	2
chr1.3309001.3309300	5
chr1.3309901.3310200	19
chr1.3310201.3310500	5
chr1.3310501.3310800	4
chr1.3311101.3311400	1
chr1.33166801.33167100	3
chr1.3320701.3321000	2
chr1.3321001.3321300	8
chr1.33219901.33220200	45
chr1.33220201.33220500	26
chr1.33222001.33222300	1
chr1.3322501.3322800	2
chr1.33236701.33237000	3
chr1.3327301.3327600	1
chr1.3332101.3332400	5
chr1.3340201.3340500	4
chr1.33429001.33429300	2
chr1.33516901.33517200	6
chr1.33517201.33517500	4
chr1.3353401.3353700	1
chr1.33622501.33622800	24
chr1.33645301.33645600	1
chr1.33716401.33716700	8
chr1.3371701.3372000	6
chr1.33720001.33720300	1
chr1.3372001.3372300	6
chr1.3372301.3372600	2
chr1.3373501.3373800	45
chr1.33747301.33747600	1
chr1.33939001.33939300	3
chr1.3394201.3394500	54
chr1.3394501.3394800	2
chr1.3394801.3395100	12
chr1.34089901.34090200	22
chr1.3426301.3426600	1
chr1.3427801.3428100	1
chr1.3428701.3429000	3
chr1.3435301.3435600	11
chr1.3438001.3438300	6
chr1.3457801.3458100	1
chr1.34643401.34643700	17
chr1.3497701.3498000	2
chr1.3499801.3500100	1
chr1.3500101.3500400	2
chr1.3500401.3500700	1
chr1.3501301.3501600	14
chr1.3501901.3502200	1
chr1.3525901.3526200	3
chr1.35331001.35331300	1
chr1.35334901.35335200	2
chr1.3555001.3555300	1
chr1.3557701.3558000	1
chr1.3561301.3561600	1
chr1.3562801.3563100	1
chr1.35660701.35661000	1
chr1.3571501.3571800	73
chr1.3590401.3590700	3
chr1.36038401.36038700	4
chr1.36045001.36045300	1
chr1.3605401.3605700	1
chr1.3606901.3607200	6
chr1.36108601.36108900	1
chr1.36172501.36172800	17
chr1.3621901.3622200	41
chr1.3623101.3623400	1
chr1.36236101.36236400	2
chr1.3624001.3624300	1
chr1.36271501.36271800	1
chr1.36283801.36284100	85
chr1.3632401.3632700	5
chr1.3635401.3635700	3
chr1.3647401.3647700	1
chr1.3647701.3648000	3
chr1.36553501.36553800	4
chr1.36591301.36591600	19
chr1.36591601.36591900	7
chr1.36614101.36614400	1
chr1.3661801.3662100	3
chr1.3664201.3664500	14
chr1.36642301.36642600	1
chr1.36773701.36774000	1
chr1.36784801.36785100	1
chr1.36787501.36787800	4
chr1.36807301.36807600	12
chr1.3686701.3687000	6
chr1.3691501.3691800	4
chr1.36916501.36916800	1
chr1.3731101.3731400	1
chr1.3732001.3732300	2
chr1.3772801.3773100	1
chr1.3774901.3775200	10
chr1.37784401.37784700	12
chr1.37785001.37785300	44
chr1.3791701.3792000	6
chr1.37978801.37979100	1
chr1.38010301.38010600	1
chr1.38018401.38018700	14
chr1.38018701.38019000	2
chr1.38021701.38022000	3
chr1.38022301.38022600	1
chr1.38022601.38022900	12
chr1.3808201.3808500	2
chr1.3808801.3809100	3
chr1.38155801.38156100	1
chr1.38159701.38160000	21
chr1.3823201.3823500	19
chr1.3824101.3824400	2
chr1.3824401.3824700	4
chr1.38472301.38472600	1
chr1.38513401.38513700	13
chr1.39336301.39336600	3
chr1.39545401.39545700	7
chr1.39979501.39979800	1
chr1.39981901.39982200	6
chr1.39982201.39982500	38
chr1.40105801.40106100	1
chr1.40148701.40149000	52
chr1.40205101.40205400	2
chr1.40237801.40238100	5
chr1.40255201.40255500	1
chr1.40565101.40565400	2
chr1.40596901.40597200	2
chr1.40598401.40598700	1
chr1.40626301.40626600	6
chr1.4079101.4079400	2
chr1.4079401.4079700	16
chr1.41114401.41114700	2
chr1.41119801.41120100	4
chr1.41121301.41121600	2
chr1.41164501.41164800	2
chr1.41281801.41282100	26
chr1.41304301.41304600	2
chr1.41349301.41349600	1
chr1.41825701.41826000	21
chr1.41851201.41851500	2
chr1.41887201.41887500	1
chr1.41887801.41888100	13
chr1.4191001.4191300	1
chr1.41994601.41994900	12
chr1.41994901.41995200	17
chr1.42385201.42385500	1
chr1.42611701.42612000	10
chr1.42845101.42845400	1
chr1.42927601.42927900	81
chr1.43205401.43205700	1
chr1.43205701.43206000	6
chr1.43206001.43206300	35
chr1.4327801.4328100	8
chr1.43284901.43285200	1
chr1.43351501.43351800	6
chr1.43352701.43353000	1
chr1.43353901.43354200	2
chr1.43405501.43405800	2
chr1.43422001.43422300	2
chr1.43426801.43427100	21
chr1.43471201.43471500	3
chr1.43472101.43472400	3
chr1.43736401.43736700	7
chr1.43737901.43738200	4
chr1.43814101.43814400	5
chr1.43823701.43824000	42
chr1.43830601.43830900	40
chr1.43834801.43835100	1
chr1.43835101.43835400	1
chr1.43857901.43858200	1
chr1.44029201.44029500	4
chr1.44031001.44031300	1
chr1.44064601.44064900	1
chr1.44069701.44070000	4
chr1.44072401.44072700	1
chr1.44114701.44115000	29
chr1.44380801.44381100	41
chr1.44381101.44381400	15
chr1.44397001.44397300	2
chr1.44430901.44431200	22
chr1.44433901.44434200	10
chr1.44437501.44437800	1
chr1.44823001.44823300	31
chr1.44869501.44869800	4
chr1.449701.450000	3
chr1.450301.450600	1
chr1.450601.450900	5
chr1.45191101.45191400	1
chr1.45195001.45195300	1
chr1.45207301.45207600	1
chr1.45207601.45207900	4
chr1.45238801.45239100	24
chr1.45249001.45249300	1
chr1.45269701.45270000	7
chr1.45279601.45279900	2
chr1.45309301.45309600	5
chr1.45450301.45450600	2
chr1.45791101.45791400	1
chr1.45963301.45963600	1
chr1.46014301.46014600	1
chr1.46015801.46016100	1
chr1.46088701.46089000	1
chr1.46091101.46091400	1
chr1.46215001.46215300	2
chr1.46631401.46631700	1
chr1.46706101.46706400	4
chr1.46706401.46706700	2
chr1.46707001.46707300	1
chr1.46707901.46708200	14
chr1.46765201.46765500	1
chr1.46770601.46770900	2
chr1.46796401.46796700	2
chr1.46805101.46805400	1
chr1.46806001.46806300	5
chr1.46858201.46858500	4
chr1.46940401.46940700	18
chr1.46950001.46950300	12
chr1.46950301.46950600	6
chr1.46951801.46952100	6
chr1.4707601.4707900	5
chr1.47080501.47080800	1
chr1.4726501.4726800	16
chr1.4726801.4727100	383
chr1.47488501.47488800	1
chr1.47488801.47489100	1
chr1.47694301.47694600	4
chr1.4770001.4770300	7
chr1.47778601.47778900	3
chr1.47883301.47883600	22
chr1.47899201.47899500	2
chr1.47899501.47899800	22
chr1.47913901.47914200	4
chr1.48057901.48058200	1
chr1.48058201.48058500	1
chr1.48224401.48224700	9
chr1.4831801.4832100	51
chr1.4833601.4833900	2
chr1.48539701.48540000	2
chr1.5033101.5033400	140
chr1.50881201.50881500	11
chr1.51383101.51383400	3
chr1.51810001.51810300	3
chr1.52197301.52197600	1
chr1.52342501.52342800	3
chr1.52455301.52455600	1
chr1.52455601.52455900	17
chr1.52497301.52497600	1
chr1.52885201.52885500	1
chr1.53066101.53066400	2
chr1.53069101.53069400	3
chr1.53092501.53092800	2
chr1.531001.531300	3
chr1.53309401.53309700	1
chr1.53311201.53311500	22
chr1.53392501.53392800	6
chr1.534301.534600	1
chr1.53528401.53528700	1
chr1.53542801.53543100	17
chr1.53546401.53546700	1
chr1.53558701.53559000	5
chr1.53903701.53904000	6
chr1.53925001.53925300	10
chr1.54141301.54141600	4
chr1.54412801.54413100	10
chr1.546601.546900	3
chr1.54819901.54820200	2
chr1.54855601.54855900	4
chr1.55010401.55010700	2
chr1.55246201.55246500	10
chr1.55266001.55266300	1
chr1.55272001.55272300	26
chr1.55447201.55447500	4
chr1.55464301.55464600	1
chr1.55464601.55464900	1
chr1.55507801.55508100	32
chr1.55753801.55754100	3
chr1.56438701.56439000	1
chr1.56941801.56942100	2
chr1.57024601.57024900	14
chr1.5772601.5772900	1
chr1.5772901.5773200	7
chr1.57892501.57892800	2
chr1.58716301.58716600	8
chr1.59010601.59010900	3
chr1.59395201.59395500	1
chr1.5949001.5949300	1
chr1.6050101.6050400	16
chr1.6054301.6054600	1
chr1.6084301.6084600	17
chr1.61369201.61369500	1
chr1.61385701.61386000	2
chr1.6186601.6186900	9
chr1.6186901.6187200	3
chr1.6187201.6187500	14
chr1.6187801.6188100	54
chr1.6189001.6189300	1
chr1.6189901.6190200	1
chr1.6200101.6200400	5
chr1.6201601.6201900	13
chr1.6208801.6209100	2
chr1.6209401.6209700	4
chr1.6209701.6210000	3
chr1.6210001.6210300	90
chr1.6210901.6211200	10
chr1.62191801.62192100	1
chr1.62206801.62207100	1
chr1.6242701.6243000	5
chr1.6243001.6243300	1
chr1.6264601.6264900	6
chr1.62659501.62659800	6
chr1.62660101.62660400	44
chr1.62660401.62660700	18
chr1.62662801.62663100	52
chr1.6270601.6270900	1
chr1.62773501.62773800	1
chr1.62785801.62786100	1
chr1.62904901.62905200	3
chr1.6296701.6297000	1
chr1.6297001.6297300	1
chr1.6307501.6307800	2
chr1.6308701.6309000	1
chr1.6310501.6310800	2
chr1.6315001.6315300	1
chr1.63151501.63151800	4
chr1.6315301.6315600	1
chr1.6315601.6315900	5
chr1.63192301.63192600	2
chr1.6322501.6322800	3
chr1.6336601.6336900	3
chr1.6338701.6339000	2
chr1.6339001.6339300	1
chr1.6341101.6341400	3
chr1.6351301.6351600	1
chr1.6359701.6360000	6
chr1.6373801.6374100	1
chr1.64060201.64060500	4
chr1.6487201.6487500	57
chr1.6499501.6499800	10
chr1.6510901.6511200	91
chr1.6511201.6511500	1
chr1.6518701.6519000	1
chr1.6520501.6520800	1
chr1.6521401.6521700	1
chr1.6530101.6530400	1
chr1.6532501.6532800	4
chr1.6533101.6533400	4
chr1.65434201.65434500	46
chr1.65467201.65467500	21
chr1.6549001.6549300	4
chr1.6558001.6558300	22
chr1.6654601.6654900	2
chr1.6658501.6658800	1
chr1.6664801.6665100	4
chr1.6672301.6672600	6
chr1.6677701.6678000	4
chr1.6708901.6709200	1
chr1.6760201.6760500	2
chr1.6764101.6764400	1
chr1.68101201.68101500	1
chr1.6847801.6848100	6
chr1.68510401.68510700	3
chr1.68516401.68516700	1
chr1.68517601.68517900	1
chr1.70036201.70036500	1
chr1.7021801.7022100	1
chr1.7024201.7024500	2
chr1.70806601.70806900	3
chr1.70822201.70822500	3
chr1.71510101.71510400	17
chr1.7313101.7313400	9
chr1.7531501.7531800	6
chr1.75591301.75591600	18
chr1.76260901.76261200	16
chr1.76262401.76262700	3
chr1.77230801.77231100	1
chr1.7737901.7738200	3
chr1.78350701.78351000	1
chr1.78404101.78404400	10
chr1.7842301.7842600	2
chr1.789001.789300	1
chr1.789601.789900	1
chr1.789901.790200	72
chr1.790501.790800	2
chr1.7947601.7947900	3
chr1.8012101.8012400	4
chr1.8013001.8013300	1
chr1.801901.802200	73
chr1.802201.802500	22
chr1.802501.802800	1
chr1.8070301.8070600	1
chr1.8086501.8086800	3
chr1.8087101.8087400	8
chr1.8137201.8137500	17
chr1.8262001.8262300	4
chr1.8275801.8276100	2
chr1.8276701.8277000	12
chr1.8378701.8379000	1
chr1.8384701.8385000	2
chr1.838501.838800	1
chr1.8391001.8391300	5
chr1.8393401.8393700	1
chr1.8394301.8394600	4
chr1.8397001.8397300	5
chr1.8404201.8404500	2
chr1.8404501.8404800	12
chr1.8417101.8417400	14
chr1.8420101.8420400	6
chr1.8420401.8420700	2
chr1.8445601.8445900	1
chr1.8445901.8446200	6
chr1.85086901.85087200	2
chr1.85220101.85220400	7
chr1.853501.853800	60
chr1.853801.854100	4
chr1.854401.854700	1
chr1.855601.855900	11
chr1.86048401.86048700	2
chr1.86081701.86082000	10
chr1.863101.863400	6
chr1.86620801.86621100	37
chr1.86988901.86989200	1
chr1.86989201.86989500	1
chr1.87018001.87018300	33
chr1.871501.871800	31
chr1.87204001.87204300	9
chr1.872101.872400	1
chr1.87383101.87383400	2
chr1.884101.884400	2
chr1.885301.885600	1
chr1.885601.885900	5
chr1.886501.886800	2
chr1.8879101.8879400	6
chr1.888301.888600	10
chr1.88930501.88930800	3
chr1.89457601.89457900	30
chr1.8985901.8986200	1
chr1.898801.899100	9
chr1.89887501.89887800	6
chr1.899101.899400	2
chr1.899701.900000	8
chr1.90228001.90228300	1
chr1.90307501.90307800	1
chr1.903301.903600	2
chr1.903901.904200	6
chr1.90459001.90459300	1
chr1.905101.905400	6
chr1.912301.912600	3
chr1.9127201.9127500	3
chr1.9127501.9127800	22
chr1.91301101.91301400	1
chr1.91317901.91318200	3
chr1.91357501.91357800	1
chr1.914101.914400	1
chr1.918001.918300	1
chr1.918601.918900	7
chr1.92218501.92218800	2
chr1.92270401.92270700	1
chr1.92413201.92413500	3
chr1.92495101.92495400	2
chr1.92945701.92946000	8
chr1.92947201.92947500	7
chr1.931501.931800	4
chr1.932101.932400	2
chr1.9324601.9324900	1
chr1.93248101.93248400	5
chr1.93248701.93249000	4
chr1.93249301.93249600	2
chr1.9325201.9325500	5
chr1.94134001.94134300	24
chr1.94148101.94148400	31
chr1.942001.942300	6
chr1.9429001.9429300	23
chr1.9429301.9429600	8
chr1.945601.945900	14
chr1.94583401.94583700	2
chr1.948301.948600	1
chr1.9486901.9487200	1
chr1.951001.951300	5
chr1.953401.953700	2
chr1.95394301.95394600	157
chr1.95697901.95698200	1
chr1.961801.962100	3
chr1.963301.963600	8
chr1.9648001.9648300	2
chr1.965101.965400	1
chr1.965701.966000	7
chr1.9669001.9669300	1
chr1.9670501.9670800	1
chr1.9670801.9671100	4
chr1.9684901.9685200	1
chr1.9685201.9685500	1
chr1.9686701.9687000	1
chr1.9710401.9710700	5
chr1.973201.973500	1
chr1.9750601.9750900	2
chr1.977701.978000	6
chr1.979201.979500	9
chr1.98499601.98499900	8
chr1.985501.985800	1
chr1.9856501.9856800	15
chr1.9856801.9857100	3
chr1.986401.986700	1
chr1.993001.993300	1
chr1.9972301.9972600	1
chr10.100027501.100027800	6
chr10.100153201.100153500	3
chr10.100154101.100154400	1
chr10.101086801.101087100	3
chr10.101088001.101088300	1
chr10.101088301.101088600	8
chr10.101188501.101188800	3
chr10.101280901.101281200	5
chr10.101281201.101281500	2
chr10.101284501.101284800	1
chr10.101287201.101287500	11
chr10.101297701.101298000	13
chr10.101418301.101418600	44
chr10.101597701.101598000	1
chr10.101599801.101600100	1
chr10.101824201.101824500	1
chr10.101875801.101876100	46
chr10.1019401.1019700	2
chr10.102025201.102025500	3
chr10.102026401.102026700	1
chr10.102047701.102048000	4
chr10.1021201.1021500	1
chr10.102421201.102421500	1
chr10.102432301.102432600	10
chr10.102633601.102633900	1
chr10.102756001.102756300	6
chr10.102766501.102766800	1
chr10.102777301.102777600	8
chr10.102780301.102780600	1
chr10.102789301.102789600	1
chr10.102883501.102883800	6
chr10.103325701.103326000	1
chr10.103327801.103328100	1
chr10.103589101.103589400	1
chr10.103913701.103914000	1
chr10.104151601.104151900	22
chr10.104158501.104158800	17
chr10.104160301.104160600	1
chr10.104168101.104168400	1
chr10.104189701.104190000	11
chr10.104218801.104219100	23
chr10.104223001.104223300	40
chr10.104260201.104260500	3
chr10.104416501.104416800	1
chr10.104631301.104631600	1
chr10.104676601.104676900	15
chr10.104676901.104677200	5
chr10.105111001.105111300	1
chr10.105111901.105112200	1
chr10.105126001.105126300	24
chr10.105129001.105129300	4
chr10.105130201.105130500	1
chr10.105215401.105215700	1
chr10.105234001.105234300	1
chr10.105234301.105234600	1
chr10.105315901.105316200	1
chr10.105317101.105317400	40
chr10.105345001.105345300	2
chr10.105361801.105362100	18
chr10.105363001.105363300	4
chr10.105448201.105448500	53
chr10.105452401.105452700	1
chr10.10747201.10747500	29
chr10.1101601.1101900	9
chr10.110359801.110360100	1
chr10.11112301.11112600	47
chr10.111684001.111684300	1
chr10.111984301.111984600	5
chr10.112466401.112466700	8
chr10.112668901.112669200	3
chr10.1145701.1146000	2
chr10.1147501.1147800	1
chr10.1147801.1148100	4
chr10.114939001.114939300	1
chr10.115080001.115080300	3
chr10.115860001.115860300	1
chr10.115862701.115863000	3
chr10.116046001.116046300	1
chr10.116255101.116255400	3
chr10.116393701.116394000	4
chr10.116851201.116851500	16
chr10.11836201.11836500	1
chr10.118367701.118368000	1
chr10.118369801.118370100	7
chr10.118430101.118430400	7
chr10.118546201.118546500	61
chr10.118765201.118765500	2
chr10.118801.119100	1
chr10.118886401.118886700	20
chr10.118895701.118896000	101
chr10.118896001.118896300	13
chr10.119256301.119256600	2
chr10.11935501.11935800	5
chr10.119701.120000	1
chr10.1203301.1203600	2
chr10.120353401.120353700	19
chr10.120354301.120354600	99
chr10.120354901.120355200	16
chr10.120355201.120355500	14
chr10.120357001.120357300	7
chr10.1206601.1206900	5
chr10.120800401.120800700	1
chr10.120802201.120802500	2
chr10.120841801.120842100	5
chr10.12086401.12086700	31
chr10.120926401.120926700	5
chr10.120939001.120939300	3
chr10.120939301.120939600	3
chr10.121028701.121029000	8
chr10.12109501.12109800	3
chr10.121153501.121153800	3
chr10.121277401.121277700	2
chr10.121578601.121578900	1
chr10.12171001.12171300	2
chr10.12195001.12195300	14
chr10.122609401.122609700	2
chr10.122707201.122707500	5
chr10.1230901.1231200	2
chr10.123689101.123689400	3
chr10.123873901.123874200	3
chr10.123925201.123925500	1
chr10.1242001.1242300	2
chr10.124249801.124250100	1
chr10.124578601.124578900	27
chr10.124638001.124638300	3
chr10.124638301.124638600	1
chr10.124640101.124640400	1
chr10.124738501.124738800	27
chr10.1250701.1251000	2
chr10.1251301.1251600	1
chr10.125142901.125143200	63
chr10.1251601.1251900	1
chr10.1252201.1252500	1
chr10.125425501.125425800	5
chr10.125426401.125426700	1
chr10.125650201.125650500	1
chr10.125651701.125652000	9
chr10.125652001.125652300	1
chr10.125805601.125805900	3
chr10.125994601.125994900	2
chr10.126151801.126152100	8
chr10.126301501.126301800	32
chr10.126330601.126330900	3
chr10.126340501.126340800	1
chr10.126479101.126479400	10
chr10.126482101.126482400	3
chr10.126489601.126489900	1
chr10.126684301.126684600	3
chr10.126688801.126689100	1
chr10.126712501.126712800	3
chr10.126712801.126713100	2
chr10.126839401.126839700	1
chr10.126851101.126851400	1
chr10.126915601.126915900	4
chr10.126916801.126917100	74
chr10.126917101.126917400	5
chr10.127460701.127461000	4
chr10.127461601.127461900	8
chr10.127464001.127464300	4
chr10.127582201.127582500	1
chr10.127584001.127584300	6
chr10.127585501.127585800	1
chr10.128077501.128077800	4
chr10.128194501.128194800	1
chr10.128595001.128595300	10
chr10.1286101.1286400	10
chr10.128974201.128974500	2
chr10.128975101.128975400	5
chr10.128992801.128993100	2
chr10.129195301.129195600	2
chr10.129536401.129536700	1
chr10.129536701.129537000	8
chr10.12958501.12958800	3
chr10.12961501.12961800	6
chr10.129926701.129927000	10
chr10.129946501.129946800	2
chr10.129947701.129948000	3
chr10.130010401.130010700	2
chr10.130015201.130015500	3
chr10.130065301.130065600	3
chr10.13041001.13041300	1
chr10.130506901.130507200	1
chr10.131264101.131264400	1
chr10.131266501.131266800	1
chr10.13140601.13140900	1
chr10.131577601.131577900	23
chr10.131577901.131578200	2
chr10.131578201.131578500	11
chr10.131639101.131639400	7
chr10.131666701.131667000	91
chr10.131685001.131685300	1
chr10.131686801.131687100	5
chr10.131687401.131687700	134
chr10.131693401.131693700	4
chr10.131694601.131694900	8
chr10.131698801.131699100	13
chr10.131750101.131750400	1
chr10.131772001.131772300	1
chr10.131812201.131812500	1
chr10.131843401.131843700	35
chr10.131986201.131986500	1
chr10.131989801.131990100	45
chr10.13200901.13201200	10
chr10.132872401.132872700	1
chr10.132874501.132874800	3
chr10.132891601.132891900	30
chr10.133056601.133056900	4
chr10.133144201.133144500	1
chr10.133251601.133251900	3
chr10.133318201.133318500	3
chr10.13344601.13344900	2
chr10.13345501.13345800	1
chr10.133506601.133506900	2
chr10.133644001.133644300	4
chr10.133646401.133646700	6
chr10.133752901.133753200	1
chr10.133834501.133834800	1
chr10.133878601.133878900	2
chr10.133930201.133930500	1
chr10.133947301.133947600	1
chr10.133950301.133950600	1
chr10.133950601.133950900	16
chr10.133954501.133954800	5
chr10.134015101.134015400	4
chr10.134017801.134018100	10
chr10.134018701.134019000	1
chr10.134038801.134039100	21
chr10.134041501.134041800	16
[truncated: 18,012 more rows]

## Sheet: 10_6_LUC
DMR	N_of_occurrence
chr1.1002001.1002300	3
chr1.100314001.100314300	1
chr1.100597201.100597500	2
chr1.100599601.100599900	13
chr1.100815601.100815900	2
chr1.100827301.100827600	7
chr1.10091701.10092000	6
chr1.10094701.10095000	1
chr1.1009801.1010100	5
chr1.1011301.1011600	68
chr1.1012801.1013100	63
chr1.1013401.1013700	3
chr1.1013701.1014000	2
chr1.1014001.1014300	1
chr1.1014301.1014600	1
chr1.1016101.1016400	60
chr1.1016701.1017000	2
chr1.1020601.1020900	3
chr1.1023901.1024200	4
chr1.1024501.1024800	1
chr1.10245601.10245900	1
chr1.10268701.10269000	26
chr1.10271701.10272000	1
chr1.1046401.1046700	1
chr1.1050001.1050300	2
chr1.10533001.10533300	1
chr1.10533601.10533900	1
chr1.10534501.10534800	75
chr1.10559401.10559700	9
chr1.1063801.1064100	2
chr1.106625701.106626000	1
chr1.10697101.10697400	6
chr1.10697701.10698000	8
chr1.10700101.10700400	2
chr1.10702201.10702500	5
chr1.10703101.10703400	14
chr1.10705801.10706100	1
chr1.10707001.10707300	1
chr1.10707601.10707900	1
chr1.10719901.10720200	1
chr1.10723501.10723800	1
chr1.10725001.10725300	4
chr1.10725901.10726200	1
chr1.10758301.10758600	9
chr1.10758601.10758900	1
chr1.10762201.10762500	25
chr1.10763701.10764000	14
chr1.10766701.10767000	2
chr1.108022501.108022800	3
chr1.108509401.108509700	1
chr1.108735601.108735900	1
chr1.108815701.108816000	1
chr1.108816301.108816600	9
chr1.109506301.109506600	15
chr1.109585801.109586100	27
chr1.1095901.1096200	5
chr1.109616701.109617000	11
chr1.109617301.109617600	2
chr1.109619101.109619400	1
chr1.109631101.109631400	2
chr1.109632001.109632300	15
chr1.109632601.109632900	2
chr1.1097401.1097700	2
chr1.109793101.109793400	2
chr1.109797601.109797900	15
chr1.109803001.109803300	3
chr1.109827601.109827900	1
chr1.110007601.110007900	1
chr1.110051101.110051400	1
chr1.110187301.110187600	4
chr1.110197801.110198100	2
chr1.110212201.110212500	1
chr1.1102201.1102500	3
chr1.11040001.11040300	20
chr1.110526001.110526300	1
chr1.110578501.110578800	9
chr1.110610001.110610300	9
chr1.110610301.110610600	1
chr1.1107301.1107600	6
chr1.11073601.11073900	1
chr1.11074801.11075100	39
chr1.1107601.1107900	8
chr1.1109701.1110000	1
chr1.1110901.1111200	14
chr1.111146701.111147000	1
chr1.11118601.11118900	2
chr1.11118901.11119200	1
chr1.111321901.111322200	2
chr1.1113901.1114200	3
chr1.111508201.111508500	28
chr1.111815701.111816000	1
chr1.112161601.112161900	5
chr1.11236501.11236800	2
chr1.112387501.112387800	1
chr1.112525501.112525800	2
chr1.113049601.113049900	1
chr1.1131601.1131900	119
chr1.11321401.11321700	1
chr1.113285701.113286000	2
chr1.113286301.113286600	1
chr1.1133101.1133400	2
chr1.113393701.113394000	2
chr1.113394001.113394300	1
chr1.1134901.1135200	1
chr1.113499301.113499600	17
chr1.113500801.113501100	2
chr1.1135201.1135500	2
chr1.1135501.1135800	4
chr1.1135801.1136100	1
chr1.113613301.113613600	1
chr1.113613601.113613900	1
chr1.113613901.113614200	2
chr1.113617201.113617500	1
chr1.113675401.113675700	5
chr1.1137301.1137600	1
chr1.113741701.113742000	2
chr1.11392801.11393100	3
chr1.1139701.1140000	1
chr1.1140601.1140900	1
chr1.1143001.1143300	79
chr1.114355501.114355800	9
chr1.1143601.1143900	1
chr1.114445801.114446100	5
chr1.114469801.114470100	3
chr1.1149601.1149900	20
chr1.1150201.1150500	1
chr1.1151401.1151700	33
chr1.1152901.1153200	1
chr1.11562601.11562900	7
chr1.1158601.1158900	1
chr1.11591401.11591700	12
chr1.1159501.1159800	2
chr1.11595301.11595600	1
chr1.1161001.1161300	4
chr1.116184001.116184300	1
chr1.1162201.1162500	10
chr1.116221801.116222100	2
chr1.116371501.116371800	19
chr1.1164001.1164300	2
chr1.116710201.116710500	28
chr1.1170001.1170300	5
chr1.117018001.117018300	46
chr1.117075601.117075900	56
chr1.11712001.11712300	2
chr1.117169501.117169800	106
chr1.1171801.1172100	2
chr1.11725201.11725500	1
chr1.117284101.117284400	1
chr1.1173301.1173600	6
chr1.1173601.1173900	1
chr1.117450601.117450900	3
chr1.117450901.117451200	1
chr1.117451801.117452100	1
chr1.1174801.1175100	2
chr1.117525901.117526200	1
chr1.117666301.117666600	2
chr1.1176901.1177200	2
chr1.11777401.11777700	2
chr1.11781301.11781600	10
chr1.11781601.11781900	1
chr1.118146901.118147200	4
chr1.118147501.118147800	1
chr1.11821201.11821500	25
chr1.11822701.11823000	1
chr1.118727401.118727700	1
chr1.1187401.1187700	4
chr1.1188601.1188900	17
chr1.1189501.1189800	1
chr1.11896201.11896500	4
chr1.11898301.11898600	4
chr1.11898601.11898900	11
chr1.1190701.1191000	1
chr1.1191001.1191300	23
chr1.1191601.1191900	1
chr1.11985301.11985600	1
chr1.11992501.11992800	3
chr1.11992801.11993100	3
chr1.11995801.11996100	29
chr1.1200901.1201200	3
chr1.1201201.1201500	2
chr1.120165901.120166200	4
chr1.120192001.120192300	4
chr1.120192301.120192600	3
chr1.120192601.120192900	1
chr1.12038401.12038700	6
chr1.1203901.1204200	4
chr1.120396001.120396300	8
chr1.12041401.12041700	7
chr1.120438601.120438900	1
chr1.12051001.12051300	3
chr1.1205101.1205400	2
chr1.1207201.1207500	5
chr1.12081001.12081300	6
chr1.1208101.1208400	2
chr1.120903001.120903300	1
chr1.120904801.120905100	1
chr1.120923701.120924000	3
chr1.1210501.1210800	1
chr1.121140901.121141200	1
chr1.12122101.12122400	3
chr1.12228301.12228600	7
chr1.12251101.12251400	1
chr1.12251701.12252000	19
chr1.12252601.12252900	1
chr1.1228201.1228500	8
chr1.12291601.12291900	14
chr1.12291901.12292200	3
chr1.1230901.1231200	14
chr1.1246501.1246800	1
chr1.1248301.1248600	13
chr1.1252201.1252500	7
chr1.12600601.12600900	2
chr1.12601201.12601500	2
chr1.12601501.12601800	1
chr1.12602401.12602700	3
chr1.1262401.1262700	5
chr1.12657001.12657300	1
chr1.1265701.1266000	1
chr1.1267501.1267800	2
chr1.12681901.12682200	2
chr1.1270501.1270800	1
chr1.1273201.1273500	23
chr1.1295401.1295700	2
chr1.1308001.1308300	4
chr1.1308301.1308600	9
chr1.1309501.1309800	1
chr1.1311301.1311600	1
chr1.1320601.1320900	1
chr1.1320901.1321200	82
chr1.132901.133200	2
chr1.1332001.1332300	1
chr1.133801.134100	21
chr1.134701.135000	9
chr1.135301.135600	34
chr1.1355701.1356000	1
chr1.1360201.1360500	1
chr1.1361101.1361400	5
chr1.1372801.1373100	2
chr1.1373701.1374000	3
chr1.13879501.13879800	1
chr1.1389301.1389600	1
chr1.1391401.1391700	4
chr1.13920001.13920300	1
chr1.1394101.1394400	1
chr1.1395301.1395600	1
chr1.1395901.1396200	2
chr1.1398001.1398300	3
chr1.1408201.1408500	8
chr1.1412101.1412400	1
chr1.1413301.1413600	2
chr1.1414201.1414500	8
chr1.1415101.1415400	2
chr1.1419901.1420200	12
chr1.142539001.142539300	2
chr1.142539301.142539600	21
chr1.142617901.142618200	10
chr1.142891501.142891800	15
chr1.142892401.142892700	1
chr1.142892701.142893000	3
chr1.143270101.143270400	20
chr1.143271601.143271900	7
chr1.143647201.143647500	1
chr1.143663701.143664000	24
chr1.143664601.143664900	3
chr1.144301501.144301800	7
chr1.144310501.144310800	6
chr1.1444201.1444500	18
chr1.1445101.1445400	4
chr1.144534601.144534900	1
chr1.1449901.1450200	20
chr1.1450201.1450500	37
chr1.145073701.145074000	4
chr1.145075801.145076100	1
chr1.145076401.145076700	173
chr1.145077301.145077600	2
chr1.145077601.145077900	3
chr1.145092601.145092900	5
chr1.145095601.145095900	6
chr1.145137601.145137900	4
chr1.1452301.1452600	1
chr1.145380601.145380900	1
chr1.145383001.145383300	13
chr1.145383301.145383600	1
chr1.145385401.145385700	1
chr1.145469101.145469400	14
chr1.145609501.145609800	24
chr1.145611601.145611900	5
chr1.145827301.145827600	8
chr1.146076601.146076900	1
chr1.146079301.146079600	2
chr1.146091601.146091900	4
chr1.146092801.146093100	3
chr1.1463101.1463400	5
chr1.146367601.146367900	26
chr1.1465201.1465500	1
chr1.146522101.146522400	1
chr1.146522401.146522700	4
chr1.146524201.146524500	1
chr1.146544001.146544300	4
chr1.146544901.146545200	1
chr1.146546401.146546700	2
chr1.146549401.146549700	10
chr1.146549701.146550000	1
chr1.146550601.146550900	1
chr1.146551201.146551500	16
chr1.146555101.146555400	7
chr1.146642101.146642400	1
chr1.146642401.146642700	3
chr1.1470301.1470600	3
chr1.147143101.147143400	2
chr1.147380401.147380700	18
chr1.147399601.147399900	1
chr1.147486001.147486300	1
chr1.147487501.147487800	1
chr1.147506101.147506400	9
chr1.147522001.147522300	1
chr1.147531001.147531300	1
chr1.147531301.147531600	6
chr1.147533701.147534000	1
chr1.1476001.1476300	94
chr1.147618601.147618900	6
chr1.147621001.147621300	1
chr1.1476901.1477200	1
chr1.147717301.147717600	1
chr1.147718201.147718500	3
chr1.1477201.1477500	106
chr1.1477501.1477800	1
chr1.147776101.147776400	37
chr1.147782401.147782700	2
chr1.147788401.147788700	1
chr1.147825901.147826200	1
chr1.147827101.147827400	2
chr1.1478401.1478700	1
chr1.147991801.147992100	1
chr1.147996001.147996300	21
chr1.148002301.148002600	1
chr1.148246801.148247100	1
chr1.148247401.148247700	53
chr1.148554901.148555200	3
chr1.148555201.148555500	5
chr1.148602301.148602600	3
chr1.148603201.148603500	2
chr1.148607401.148607700	1
chr1.148761901.148762200	70
chr1.148764601.148764900	2
chr1.148851901.148852200	4
chr1.148852201.148852500	1
chr1.148853401.148853700	2
chr1.148854601.148854900	1
chr1.148864501.148864800	2
chr1.148864801.148865100	16
chr1.1489501.1489800	2
chr1.149029201.149029500	1
chr1.1491001.1491300	12
chr1.149136601.149136900	1
chr1.149222101.149222400	1
chr1.149222401.149222700	1
chr1.149222701.149223000	11
chr1.149261101.149261400	3
chr1.149333101.149333400	5
chr1.149333701.149334000	6
chr1.149334001.149334300	3
chr1.1494901.1495200	1
chr1.149604601.149604900	3
chr1.149607901.149608200	1
chr1.1496401.1496700	6
chr1.149670301.149670600	4
chr1.149672701.149673000	1
chr1.149718301.149718600	3
chr1.149719501.149719800	6
chr1.149765401.149765700	1
chr1.149784301.149784600	2
chr1.149784601.149784900	5
chr1.150119701.150120000	1
chr1.150154501.150154800	68
chr1.150184501.150184800	8
chr1.150187201.150187500	1
chr1.150187801.150188100	5
chr1.150209401.150209700	15
chr1.150252901.150253200	3
chr1.150291601.150291900	3
chr1.150292201.150292500	1
chr1.150292801.150293100	1
chr1.150293401.150293700	7
chr1.150295201.150295500	3
chr1.150486601.150486900	8
chr1.150489301.150489600	11
chr1.150519901.150520200	7
chr1.150528601.150528900	1
chr1.150529201.150529500	1
chr1.150530101.150530400	1
chr1.150530701.150531000	2
chr1.150531001.150531300	1
chr1.150772501.150772800	16
chr1.150851101.150851400	8
chr1.150897301.150897600	3
chr1.150947701.150948000	1
chr1.151019701.151020000	6
chr1.151044001.151044300	11
chr1.151103101.151103400	3
chr1.151104301.151104600	6
chr1.151106101.151106400	5
chr1.151107601.151107900	1
chr1.1511101.1511400	1
chr1.151252201.151252500	3
chr1.15127201.15127500	6
chr1.15128101.15128400	7
chr1.151300801.151301100	8
chr1.151317601.151317900	4
chr1.151583101.151583400	18
chr1.151737901.151738200	1
chr1.151765201.151765500	2
chr1.151884301.151884600	28
chr1.152010001.152010300	1
chr1.152080201.152080500	48
chr1.152080801.152081100	1
chr1.152161501.152161800	9
chr1.15240001.15240300	4
chr1.15335701.15336000	19
chr1.1536001.1536300	12
chr1.153633001.153633300	1
chr1.153641101.153641400	1
chr1.153645301.153645600	1
chr1.153649501.153649800	6
chr1.153654001.153654300	1
chr1.153661201.153661500	1
chr1.153661501.153661800	1
chr1.153704401.153704700	1
chr1.153704701.153705000	13
chr1.15373501.15373800	2
chr1.15373801.15374100	5
chr1.153754201.153754500	3
chr1.153762301.153762600	1
chr1.15376501.15376800	9
chr1.15377401.15377700	1
chr1.153897601.153897900	4
chr1.153913201.153913500	10
chr1.153914401.153914700	3
chr1.153915001.153915300	90
chr1.153936901.153937200	5
chr1.153951901.153952200	134
chr1.153961201.153961500	1
chr1.153961501.153961800	4
chr1.154166101.154166400	5
chr1.154404901.154405200	8
chr1.154475101.154475400	1
chr1.154475401.154475700	2
chr1.154476001.154476300	1
chr1.154546501.154546800	3
chr1.154578601.154578900	2
chr1.154720501.154720800	10
chr1.154761001.154761300	22
chr1.154931701.154932000	24
chr1.154932301.154932600	1
chr1.154987501.154987800	3
chr1.154998001.154998300	4
chr1.155035501.155035800	94
chr1.155038201.155038500	1
chr1.155096401.155096700	2
chr1.155098201.155098500	14
chr1.155143501.155143800	1
chr1.155218501.155218800	2
chr1.1552201.1552500	2
chr1.155241301.155241600	20
chr1.155241901.155242200	1
chr1.155248801.155249100	4
chr1.155264701.155265000	18
chr1.155265301.155265600	12
chr1.155267401.155267700	57
chr1.155276401.155276700	8
chr1.1552801.1553100	5
chr1.155290801.155291100	1
chr1.155295001.155295300	2
chr1.15541801.15542100	1
chr1.155534101.155534400	9
chr1.155577901.155578200	7
chr1.155578201.155578500	2
chr1.155578801.155579100	2
chr1.155582101.155582400	18
chr1.155655901.155656200	37
chr1.155659501.155659800	10
chr1.155713501.155713800	1
chr1.155717701.155718000	3
chr1.15573301.15573600	2
chr1.155757001.155757300	5
chr1.15585301.15585600	2
chr1.155919001.155919300	1
chr1.156021001.156021300	2
chr1.156046201.156046500	4
chr1.156053401.156053700	5
chr1.156105601.156105900	2
chr1.156259201.156259500	1
chr1.156261001.156261300	63
chr1.156261301.156261600	1
chr1.156308701.156309000	16
chr1.156310201.156310500	1
chr1.156337501.156337800	4
chr1.1564501.1564800	1
chr1.156471601.156471900	9
chr1.156480601.156480900	1
chr1.156543601.156543900	18
chr1.156597001.156597300	16
chr1.156612601.156612900	1
chr1.15664201.15664500	14
chr1.156735301.156735600	2
chr1.156814501.156814800	2
chr1.1568701.1569000	8
chr1.156876001.156876300	2
chr1.156876301.156876600	1
chr1.157243201.157243500	2
chr1.15739201.15739500	1
chr1.157948801.157949100	5
chr1.157966801.157967100	42
chr1.1580101.1580400	1
chr1.15848401.15848700	1
chr1.1588801.1589100	1
chr1.15910501.15910800	5
chr1.15912601.15912900	2
chr1.15913501.15913800	10
chr1.15928801.15929100	2
chr1.159792901.159793200	16
chr1.159825601.159825900	1
chr1.159999301.159999600	2
chr1.160054201.160054500	1
chr1.160054501.160054800	3
chr1.16009201.16009500	12
chr1.16009501.16009800	4
chr1.160233001.160233300	2
chr1.160340701.160341000	2
chr1.160341001.160341300	14
chr1.160371901.160372200	6
chr1.160387501.160387800	3
chr1.160387801.160388100	1
chr1.160388701.160389000	9
chr1.160389301.160389600	2
chr1.1604401.1604700	18
chr1.16054201.16054500	1
chr1.16055101.16055400	5
chr1.160599301.160599600	2
chr1.16060501.16060800	1
chr1.16069801.16070100	1
chr1.16070401.16070700	9
chr1.16073401.16073700	1
chr1.160771801.160772100	2
chr1.1608301.1608600	2
chr1.1608601.1608900	1
chr1.1609801.1610100	3
chr1.161007901.161008200	2
chr1.1610101.1610400	2
chr1.161049001.161049300	2
chr1.161086501.161086800	2
chr1.161086801.161087100	2
chr1.161103901.161104200	7
chr1.161148901.161149200	1
chr1.161227501.161227800	1
chr1.161282701.161283000	2
chr1.161410801.161411100	2
chr1.161412901.161413200	10
chr1.161417701.161418000	20
chr1.161424901.161425200	1
chr1.161425801.161426100	18
chr1.161426401.161426700	2
chr1.161431501.161431800	3
chr1.161432101.161432400	1
chr1.161433001.161433300	1
chr1.161439301.161439600	1
chr1.161439901.161440200	2
chr1.161441101.161441400	12
chr1.161441401.161441700	3
chr1.161494801.161495100	1
chr1.161495701.161496000	1
chr1.161499301.161499600	1
chr1.161501701.161502000	4
chr1.161574301.161574600	5
chr1.161574901.161575200	1
chr1.161575501.161575800	1
chr1.161695501.161695800	20
chr1.161720101.161720400	2
chr1.161720701.161721000	1
chr1.16172101.16172400	2
chr1.16172401.16172700	2
chr1.16172701.16173000	6
chr1.161992201.161992500	7
chr1.1622101.1622400	1
chr1.16227601.16227900	8
chr1.162336901.162337200	2
chr1.162337201.162337500	1
chr1.162339001.162339300	51
chr1.162370501.162370800	52
chr1.162370801.162371100	12
chr1.1625401.1625700	1
chr1.1626901.1627200	2
chr1.16269301.16269600	1
chr1.16270501.16270800	11
chr1.16303501.16303800	2
chr1.1632001.1632300	1
chr1.1634701.1635000	1
chr1.16397401.16397700	1
chr1.164291101.164291400	1
chr1.1643101.1643400	45
chr1.164545201.164545500	1
chr1.1645801.1646100	7
chr1.164580901.164581200	1
chr1.16463101.16463400	1
chr1.16477201.16477500	18
chr1.16492801.16493100	5
chr1.16500301.16500600	1
chr1.16532101.16532400	1
chr1.16532401.16532700	1
chr1.16534801.16535100	2
chr1.16541701.16542000	2
chr1.16553701.16554000	42
chr1.16554001.16554300	2
chr1.16554301.16554600	1
chr1.16554601.16554900	2
chr1.16565701.16566000	31
chr1.1657201.1657500	1
chr1.1657501.1657800	10
chr1.1658101.1658400	1
chr1.16668901.16669200	1
chr1.16676401.16676700	3
chr1.16676701.16677000	1
chr1.166889701.166890000	1
chr1.1668901.1669200	2
chr1.16695601.16695900	1
chr1.167088301.167088600	4
chr1.167091601.167091900	1
chr1.167135701.167136000	1
chr1.167409001.167409300	1
chr1.167421901.167422200	2
chr1.167442601.167442900	11
chr1.167453701.167454000	3
chr1.167478601.167478900	17
chr1.1675201.1675500	43
chr1.16765801.16766100	3
chr1.167682001.167682300	1
chr1.167689201.167689500	2
chr1.167689801.167690100	2
chr1.1678801.1679100	15
chr1.1680301.1680600	1
chr1.16809001.16809300	5
chr1.16812001.16812300	18
chr1.168146101.168146400	21
chr1.16826101.16826400	1
chr1.16827001.16827300	6
chr1.16839001.16839300	1
chr1.16839301.16839600	1
chr1.16849801.16850100	123
chr1.16858801.16859100	2
chr1.16860301.16860600	1
chr1.16861501.16861800	22
chr1.1686301.1686600	44
chr1.16863601.16863900	3
chr1.16874101.16874400	6
chr1.1690801.1691100	1
chr1.1693201.1693500	1
chr1.16937701.16938000	2
chr1.16938901.16939200	1
chr1.16941601.16941900	2
chr1.16969201.16969500	1
chr1.16974001.16974300	1
chr1.16974301.16974600	1
chr1.16974601.16974900	1
chr1.16975801.16976100	37
chr1.16983301.16983600	4
chr1.16983601.16983900	4
chr1.16985101.16985400	1
chr1.17006401.17006700	1
chr1.17007001.17007300	1
chr1.17016601.17016900	2
chr1.17019001.17019300	15
chr1.17020801.17021100	5
chr1.17021401.17021700	45
chr1.17022901.17023200	1
chr1.17026201.17026500	1
chr1.17026801.17027100	2
chr1.17034901.17035200	2
chr1.17067901.17068200	12
chr1.17074501.17074800	2
chr1.17086501.17086800	20
chr1.171753301.171753600	1
chr1.17186101.17186400	1
chr1.17186401.17186700	3
chr1.17199901.17200200	17
chr1.17200201.17200500	62
chr1.17213401.17213700	1
chr1.17223601.17223900	2
chr1.17242801.17243100	20
chr1.17280001.17280300	2
chr1.17281201.17281500	1
chr1.17285701.17286000	3
chr1.172902901.172903200	1
chr1.17309101.17309400	3
chr1.17330401.17330700	2
chr1.173638201.173638500	2
chr1.173640601.173640900	19
chr1.17381101.17381400	4
chr1.17382301.17382600	22
chr1.173958601.173958900	4
chr1.174130801.174131100	1
chr1.174131101.174131400	7
chr1.17446801.17447100	3
chr1.17447401.17447700	30
chr1.17475901.17476200	1
chr1.17476201.17476500	14
chr1.17476801.17477100	1
chr1.175048201.175048500	6
chr1.17518801.17519100	3
chr1.178455901.178456200	2
chr1.178456501.178456800	1
chr1.178509901.178510200	2
chr1.178513201.178513500	1
chr1.178514101.178514400	6
chr1.17868601.17868900	2
chr1.179049601.179049900	4
chr1.179053201.179053500	5
chr1.179098801.179099100	1
chr1.179334301.179334600	10
chr1.179336101.179336400	1
chr1.17948101.17948400	1
chr1.17949601.17949900	3
chr1.17950201.17950500	5
chr1.179555701.179556000	11
chr1.179556001.179556300	1
chr1.179556301.179556600	4
chr1.179556601.179556900	2
chr1.179559901.179560200	1
chr1.179561701.179562000	18
chr1.17956201.17956500	4
chr1.17956501.17956800	1
chr1.179607001.179607300	5
chr1.17962501.17962800	14
chr1.1803001.1803300	28
chr1.180879301.180879600	1
chr1.180884101.180884400	1
chr1.180905401.180905700	2
chr1.180921601.180921900	2
chr1.180922201.180922500	1
chr1.181065601.181065900	1
chr1.181382101.181382400	6
chr1.182001001.182001300	28
chr1.1823701.1824000	1
chr1.182580601.182580900	3
chr1.182808001.182808300	1
chr1.182922301.182922600	1
chr1.183387301.183387600	4
chr1.183443701.183444000	2
chr1.1841401.1841700	2
chr1.1842001.1842300	3
chr1.18434701.18435000	1
chr1.18448801.18449100	15
chr1.184633501.184633800	2
chr1.184725601.184725900	1
chr1.1848001.1848300	25
chr1.1849201.1849500	5
chr1.1851901.1852200	5
chr1.1852201.1852500	2
chr1.185344501.185344800	2
chr1.1861201.1861500	1
chr1.18690901.18691200	9
chr1.18692101.18692400	15
chr1.187600201.187600500	1
chr1.18807301.18807600	13
chr1.18807901.18808200	3
chr1.18808501.18808800	1
chr1.18809101.18809400	1
chr1.1888501.1888800	7
chr1.1895101.1895400	13
chr1.1896301.1896600	1
chr1.1908601.1908900	4
chr1.1909801.1910100	1
chr1.1913701.1914000	50
chr1.19182301.19182600	1
chr1.192446101.192446400	6
chr1.192778501.192778800	21
chr1.19280101.19280400	1
chr1.19280401.19280700	15
chr1.19284301.19284600	1
chr1.193075801.193076100	4
chr1.19336501.19336800	5
chr1.19360201.19360500	3
chr1.1937101.1937400	1
chr1.1949701.1950000	1
chr1.1952401.1952700	4
chr1.1957201.1957500	2
chr1.19576201.19576500	4
chr1.19579201.19579500	1
chr1.1959301.1959600	6
chr1.19602601.19602900	1
chr1.19614001.19614300	2
chr1.1961701.1962000	2
chr1.196379701.196380000	17
chr1.19701301.19701600	10
chr1.1973101.1973400	58
chr1.1977001.1977300	3
chr1.197892301.197892600	3
chr1.198123601.198123900	2
chr1.1984801.1985100	7
chr1.198648301.198648600	1
chr1.198648601.198648900	12
chr1.1990501.1990800	8
chr1.19968901.19969200	1
chr1.19969201.19969500	3
chr1.19992901.19993200	1
chr1.200004901.200005200	2
chr1.20004601.20004900	7
chr1.20005501.20005800	7
chr1.200116201.200116500	2
chr1.200272201.200272500	1
chr1.200381101.200381400	1
chr1.2004301.2004600	3
chr1.2005801.2006100	2
chr1.200637001.200637300	1
chr1.2006401.2006700	66
chr1.200841601.200841900	1
chr1.200841901.200842200	1
chr1.200842501.200842800	4
chr1.200843101.200843400	31
chr1.200843701.200844000	20
chr1.200969101.200969400	8
chr1.200969401.200969700	17
chr1.200970001.200970300	1
chr1.201084001.201084300	10
chr1.201140701.201141000	34
chr1.201196201.201196500	1
chr1.201197101.201197400	14
chr1.20124001.20124300	1
chr1.201253501.201253800	2
chr1.201440401.201440700	2
chr1.201618301.201618600	1
chr1.201927001.201927300	6
chr1.202053901.202054200	23
chr1.202161301.202161600	1
chr1.202324501.202324800	1
chr1.2023801.2024100	1
chr1.202829701.202830000	1
chr1.202856101.202856400	1
chr1.202856401.202856700	30
chr1.202897501.202897800	17
chr1.203097601.203097900	25
chr1.203276401.203276700	1
chr1.203457901.203458200	2
chr1.203541301.203541600	1
chr1.203794201.203794500	6
chr1.2038201.2038500	1
chr1.203832301.203832600	2
chr1.204122101.204122400	2
chr1.204160801.204161100	1
chr1.204161101.204161400	1
chr1.204226501.204226800	1
chr1.204228601.204228900	29
chr1.2042401.2042700	21
chr1.204254701.204255000	1
chr1.204346501.204346800	1
chr1.204382801.204383100	4
chr1.204486901.204487200	1
chr1.204531001.204531300	13
chr1.2046001.2046300	3
chr1.2047501.2047800	1
chr1.204949501.204949800	62
chr1.204961801.204962100	5
chr1.204975901.204976200	5
chr1.205038901.205039200	3
chr1.205039201.205039500	2
chr1.205211101.205211400	1
chr1.205238701.205239000	5
chr1.205270201.205270500	15
chr1.205291501.205291800	1
chr1.205314601.205314900	3
chr1.205413301.205413600	1
chr1.205498201.205498500	4
chr1.205498801.205499100	1
chr1.205561801.205562100	1
chr1.205631401.205631700	1
chr1.205651501.205651800	68
chr1.20569501.20569800	13
chr1.205710001.205710300	8
chr1.205720201.205720500	1
chr1.205721101.205721400	61
chr1.205743001.205743300	2
chr1.205783801.205784100	6
chr1.205784101.205784400	2
chr1.205818901.205819200	41
chr1.206221501.206221800	1
chr1.206222401.206222700	4
chr1.206223001.206223300	5
chr1.206224201.206224500	1
chr1.2062501.2062800	3
chr1.2063701.2064000	18
chr1.206682901.206683200	16
chr1.206857501.206857800	12
chr1.20694301.20694600	14
chr1.206966401.206966700	3
chr1.207080101.207080400	5
chr1.207080701.207081000	18
chr1.207081301.207081600	1
chr1.207084001.207084300	2
chr1.207492301.207492600	2
chr1.207818401.207818700	2
chr1.207842701.207843000	1
chr1.208040701.208041000	11
chr1.208389001.208389300	39
chr1.2084401.2084700	46
chr1.209406001.209406300	2
chr1.20958601.20958900	1
chr1.209601001.209601300	1
chr1.209799301.209799600	4
chr1.209841601.209841900	2
chr1.20985301.20985600	2
chr1.20989201.20989500	45
chr1.20989501.20989800	105
chr1.209919301.209919600	5
chr1.209978101.209978400	24
chr1.210002101.210002400	1
chr1.210109201.210109500	1
chr1.210109501.210109800	1
chr1.21024301.21024600	1
chr1.21028801.21029100	2
chr1.21030601.21030900	1
chr1.21030901.21031200	12
chr1.21043201.21043500	7
chr1.21045601.21045900	1
chr1.21045901.21046200	2
chr1.210467401.210467700	1
chr1.210500401.210500700	1
chr1.21056101.21056400	1
chr1.21057301.21057600	1
chr1.21060901.21061200	3
chr1.21061201.21061500	12
chr1.21116101.21116400	1
chr1.211308301.211308600	21
chr1.211380301.211380600	2
chr1.211434901.211435200	1
chr1.211435201.211435500	26
chr1.2114401.2114700	4
chr1.211554901.211555200	3
chr1.211652401.211652700	1
chr1.211689301.211689600	1
chr1.211689601.211689900	1
chr1.211702801.211703100	6
chr1.2117101.2117400	11
chr1.211713001.211713300	20
chr1.2117701.2118000	1
chr1.211849501.211849800	34
chr1.2118901.2119200	1
chr1.2119201.2119500	3
chr1.212585401.212585700	5
chr1.212658001.212658300	7
chr1.212688001.212688300	19
chr1.212865001.212865300	2
chr1.212870401.212870700	7
chr1.213083401.213083700	11
chr1.213088201.213088500	1
chr1.213090301.213090600	8
chr1.213124801.213125100	40
chr1.213126001.213126300	1
chr1.213224101.213224400	40
chr1.213561901.213562200	7
chr1.213562801.213563100	1
chr1.213901501.213901800	2
chr1.21401701.21402000	1
chr1.2142301.2142600	13
chr1.214455901.214456200	4
chr1.2145001.2145300	1
chr1.214557901.214558200	1
chr1.214726501.214726800	18
chr1.214779601.214779900	1
chr1.215043601.215043900	1
chr1.215043901.215044200	4
chr1.215044801.215045100	6
chr1.21553801.21554100	3
chr1.2157301.2157600	1
chr1.2161201.2161500	2
chr1.21615301.21615600	1
chr1.21615901.21616200	2
chr1.2161801.2162100	4
chr1.21655501.21655800	90
chr1.21670501.21670800	2
chr1.21672601.21672900	1
chr1.217260901.217261200	1
chr1.217306201.217306500	3
chr1.217313701.217314000	1
chr1.21755101.21755400	1
chr1.21756301.21756600	2
chr1.21757501.21757800	4
chr1.21761101.21761400	1
chr1.21762601.21762900	1
chr1.21765601.21765900	132
chr1.21921301.21921600	1
chr1.21930301.21930600	7
chr1.21930601.21930900	14
chr1.21931201.21931500	1
chr1.21948301.21948600	82
chr1.219784201.219784500	1
chr1.21985501.21985800	1
chr1.21993001.21993300	12
chr1.220099201.220099500	8
chr1.22089001.22089300	24
chr1.220923901.220924200	1
chr1.220960801.220961100	1
chr1.221057701.221058000	1
chr1.221062201.221062500	60
chr1.221063101.221063400	7
chr1.22106401.22106700	18
chr1.221067601.221067900	13
chr1.221069701.221070000	1
chr1.22141201.22141500	3
chr1.22154401.22154700	4
chr1.22155601.22155900	5
chr1.22156201.22156500	3
chr1.22189201.22189500	4
chr1.22191301.22191600	9
chr1.221927701.221928000	2
chr1.22211401.22211700	3
chr1.22211701.22212000	14
chr1.22213801.22214100	3
chr1.222819301.222819600	1
chr1.222819601.222819900	2
chr1.222883201.222883500	1
chr1.222883501.222883800	58
chr1.223255501.223255800	2
chr1.223256401.223256700	1
chr1.2236201.2236500	2
chr1.22380601.22380900	38
chr1.2239201.2239500	1
chr1.223934101.223934400	1
chr1.223934401.223934700	1
chr1.223936501.223936800	2
chr1.223964401.223964700	45
chr1.224031301.224031600	1
chr1.224181901.224182200	2
chr1.224182201.224182500	1
chr1.224300101.224300400	2
chr1.224368501.224368800	1
chr1.224368801.224369100	2
chr1.224369701.224370000	10
chr1.224393101.224393400	12
chr1.224518801.224519100	5
chr1.22455301.22455600	1
chr1.22455901.22456200	1
chr1.224598001.224598300	1
chr1.224719501.224719800	1
chr1.2247301.2247600	2
chr1.2247901.2248200	18
chr1.224925001.224925300	1
chr1.224925301.224925600	1
chr1.2249701.2250000	15
chr1.2251801.2252100	1
chr1.2252101.2252400	67
chr1.2256001.2256300	2
chr1.225660901.225661200	3
chr1.225661201.225661500	1
chr1.225661501.225661800	1
chr1.225663301.225663600	1
chr1.225865201.225865500	15
chr1.226007101.226007400	27
chr1.226072201.226072500	1
chr1.226072501.226072800	1
chr1.226073401.226073700	12
chr1.226076701.226077000	1
chr1.226110301.226110600	1
chr1.226112401.226112700	1
chr1.226113301.226113600	1
chr1.226113601.226113900	1
chr1.22611901.22612200	7
chr1.226269901.226270200	3
chr1.226271401.226271700	1
chr1.226272601.226272900	1
chr1.226296301.226296600	3
chr1.226372501.226372800	4
chr1.226375801.226376100	9
chr1.2265901.2266200	1
chr1.22670101.22670400	1
chr1.226827301.226827600	22
chr1.226828501.226828800	2
chr1.226829701.226830000	1
chr1.226830901.226831200	37
chr1.226889101.226889400	10
chr1.226889401.226889700	8
chr1.226893001.226893300	13
chr1.226923301.226923600	10
chr1.227060701.227061000	3
chr1.227129401.227129700	3
chr1.227162701.227163000	1
chr1.227682601.227682900	4
chr1.227692201.227692500	28
chr1.227729101.227729400	37
chr1.227729701.227730000	1
chr1.227730601.227730900	1
chr1.2277601.2277900	4
chr1.22777201.22777500	1
chr1.22777801.22778100	1
chr1.22779601.22779900	4
chr1.227915701.227916000	4
chr1.227920801.227921100	26
chr1.227921401.227921700	20
chr1.227973001.227973300	10
chr1.227973601.227973900	79
chr1.227977801.227978100	7
chr1.228110701.228111000	1
chr1.228111901.228112200	18
chr1.228133801.228134100	7
chr1.228137101.228137400	66
chr1.228160801.228161100	3
chr1.228162301.228162600	2
chr1.228268501.228268800	3
chr1.228288001.228288300	1
chr1.228327301.228327600	1
chr1.228338101.228338400	16
chr1.228338401.228338700	3
chr1.228344701.228345000	2
chr1.228345601.228345900	6
chr1.228346801.228347100	1
chr1.228347701.228348000	1
chr1.228363001.228363300	1
chr1.228364201.228364500	16
chr1.228398701.228399000	7
chr1.228400501.228400800	1
chr1.228404101.228404400	1
chr1.228459601.228459900	5
chr1.228461701.228462000	1
chr1.228462001.228462300	2
chr1.228464701.228465000	4
chr1.228466201.228466500	1
chr1.228474001.228474300	1
chr1.228475801.228476100	3
chr1.228546601.228546900	10
chr1.228546901.228547200	1
chr1.228549301.228549600	1
chr1.228557701.228558000	4
chr1.228558001.228558300	1
chr1.228560701.228561000	3
chr1.228582301.228582600	2
chr1.228613501.228613800	4
chr1.228614101.228614400	21
chr1.228615001.228615300	49
chr1.22863301.22863600	6
chr1.228647401.228647700	2
chr1.228676201.228676500	1
chr1.228686101.228686400	92
chr1.228744301.228744600	1
chr1.228745201.228745500	1
chr1.228749101.228749400	2
chr1.228752701.228753000	1
chr1.228753901.228754200	2
chr1.228759601.228759900	1
chr1.228773701.228774000	1
chr1.228774601.228774900	1
chr1.228779101.228779400	1
chr1.228781201.228781500	1
chr1.228786001.228786300	2
chr1.228869401.228869700	1
chr1.22888201.22888500	4
chr1.228890401.228890700	3
chr1.228963001.228963300	6
chr1.22904101.22904400	1
chr1.22920301.22920600	24
chr1.229210501.229210800	26
chr1.22925401.22925700	17
chr1.22928101.22928400	8
chr1.22928701.22929000	23
chr1.229408201.229408500	5
chr1.229544101.229544400	1
chr1.229545001.229545300	14
chr1.229567801.229568100	2
chr1.229692301.229692600	4
chr1.229695601.229695900	3
chr1.229696201.229696500	7
chr1.229730101.229730400	13
chr1.229731301.229731600	1
chr1.22973701.22974000	31
chr1.229759201.229759500	25
chr1.229759501.229759800	1
chr1.230241301.230241600	16
chr1.230250001.230250300	2
chr1.2303101.2303400	16
chr1.2303701.2304000	1
chr1.23038801.23039100	3
chr1.230414701.230415000	54
chr1.230467801.230468100	2
chr1.2305201.2305500	1
chr1.230776501.230776800	15
chr1.231038401.231038700	1
chr1.23110801.23111100	14
chr1.231294301.231294600	1
chr1.231474901.231475200	10
chr1.231531901.231532200	2
chr1.231666301.231666600	4
chr1.2318401.2318700	18
chr1.231939301.231939600	5
chr1.232352701.232353000	1
chr1.232356301.232356600	29
chr1.233123401.233123700	2
chr1.2332801.2333100	2
chr1.2333101.2333400	2
chr1.23343601.23343900	6
chr1.23344201.23344500	4
chr1.233464801.233465100	2
chr1.23348101.23348400	16
chr1.233497801.233498100	6
chr1.2335201.2335500	1
chr1.2337601.2337900	31
chr1.2340301.2340600	1
chr1.2341501.2341800	1
chr1.234507901.234508200	10
chr1.234548701.234549000	4
chr1.234559501.234559800	3
chr1.234631501.234631800	3
chr1.2346601.2346900	1
chr1.234680401.234680700	2
chr1.234792901.234793200	1
chr1.234852301.234852600	4
chr1.234881401.234881700	65
chr1.235011301.235011600	109
chr1.235125901.235126200	5
chr1.235152001.235152300	5
chr1.235186501.235186800	2
chr1.235267201.235267500	1
chr1.235322101.235322400	1
chr1.235322401.235322700	1
chr1.23541301.23541600	1
chr1.235804801.235805100	1
chr1.235807201.235807500	6
chr1.235815301.235815600	3
chr1.235836601.235836900	1
chr1.2358901.2359200	12
chr1.2360701.2361000	1
chr1.2361001.2361300	5
chr1.2361301.2361600	1
chr1.236157601.236157900	20
chr1.236231101.236231400	2
chr1.236446501.236446800	3
chr1.236765401.236765700	1
chr1.23693401.23693700	14
chr1.23751901.23752200	2
chr1.23752501.23752800	1
chr1.237634201.237634500	2
chr1.23763601.23763900	1
chr1.23763901.23764200	1
chr1.2377501.2377800	8
chr1.237946801.237947100	3
chr1.23809201.23809500	1
chr1.238106701.238107000	1
chr1.2381101.2381400	15
chr1.2385901.2386200	2
chr1.2386801.2387100	1
chr1.2388301.2388600	8
chr1.23917201.23917500	3
chr1.2397901.2398200	2
chr1.240160501.240160800	6
chr1.240163201.240163500	1
chr1.240163501.240163800	1
chr1.24016501.24016800	1
chr1.240371101.240371400	7
chr1.240371401.240371700	18
chr1.240371701.240372000	1
chr1.240372901.240373200	27
chr1.240569101.240569400	23
chr1.240569701.240570000	30
chr1.24063601.24063900	2
chr1.240655501.240655800	2
chr1.240657001.240657300	1
chr1.240874201.240874500	2
chr1.240874501.240874800	1
chr1.2409301.2409600	12
chr1.240987601.240987900	1
chr1.24102601.24102900	8
chr1.24104101.24104400	13
chr1.24118801.24119100	1
chr1.24124801.24125100	1
chr1.2414401.2414700	1
chr1.241588201.241588500	1
chr1.241696201.241696500	1
chr1.24228301.24228600	1
chr1.24228601.24228900	2
chr1.2432101.2432400	4
chr1.243264901.243265200	1
chr1.243637501.243637800	1
chr1.243647101.243647400	2
chr1.243648001.243648300	1
chr1.243649501.243649800	23
chr1.243649801.243650100	10
chr1.243653701.243654000	4
chr1.2437201.2437500	19
chr1.2439301.2439600	1
chr1.244142401.244142700	10
chr1.244142701.244143000	4
chr1.2442001.2442300	9
chr1.244217701.244218000	1
chr1.244218001.244218300	1
chr1.244439401.244439700	1
chr1.244534801.244535100	1
chr1.244617301.244617600	11
chr1.2446201.2446500	1
chr1.244625101.244625400	25
chr1.244815001.244815300	1
chr1.244894201.244894500	14
chr1.24512701.24513000	4
chr1.245196001.245196300	3
chr1.24521401.24521700	3
chr1.245320801.245321100	1
chr1.2454601.2454900	1
chr1.245810701.245811000	1
chr1.245835001.245835300	2
chr1.245835601.245835900	21
chr1.245848801.245849100	9
chr1.245850301.245850600	35
chr1.245850601.245850900	1
chr1.246137701.246138000	13
chr1.246138001.246138300	3
chr1.246138901.246139200	1
chr1.246139501.246139800	1
chr1.246139801.246140100	1
chr1.246415801.246416100	4
chr1.2465101.2465400	6
chr1.2469001.2469300	10
chr1.246950101.246950400	3
chr1.246952801.246953100	2
chr1.247092601.247092900	1
chr1.247093201.247093500	12
chr1.247169701.247170000	21
chr1.247266301.247266600	14
chr1.247266601.247266900	4
chr1.247277101.247277400	2
chr1.247279201.247279500	1
chr1.24740701.24741000	8
chr1.247465801.247466100	1
chr1.247539901.247540200	4
chr1.247614601.247614900	28
chr1.247620301.247620600	1
chr1.247680901.247681200	2
chr1.247803001.247803300	2
chr1.248019901.248020200	1
chr1.248098501.248098800	1
chr1.248099701.248100000	5
chr1.248100301.248100600	6
chr1.248100601.248100900	1
chr1.24826801.24827100	1
chr1.24861601.24861900	3
chr1.248894401.248894700	1
chr1.249106201.249106500	33
chr1.249106501.249106800	4
chr1.249134401.249134700	1
chr1.249139801.249140100	5
chr1.249141901.249142200	1
chr1.249142201.249142500	2
chr1.249142801.249143100	13
chr1.25069201.25069500	2
chr1.25069501.25069800	5
chr1.25070701.25071000	9
chr1.25073401.25073700	6
chr1.2515201.2515500	1
chr1.2520301.2520600	131
chr1.25233601.25233900	1
chr1.25236601.25236900	4
chr1.25236901.25237200	15
chr1.25246801.25247100	3
chr1.25247101.25247400	1
chr1.25248901.25249200	17
chr1.25250101.25250400	28
chr1.2525401.2525700	7
chr1.2526001.2526300	6
chr1.2526601.2526900	23
chr1.25273501.25273800	2
chr1.2529001.2529300	4
chr1.25292401.25292700	1
chr1.25319401.25319700	1
chr1.25348501.25348800	1
chr1.25353001.25353300	1
chr1.25357501.25357800	1
chr1.2539801.2540100	19
chr1.25567801.25568100	2
chr1.25595401.25595700	1
chr1.2575801.2576100	1
chr1.2576101.2576400	2
chr1.25869001.25869300	5
chr1.26022301.26022600	8
chr1.26098201.26098500	62
chr1.26204401.26204700	7
chr1.26247001.26247300	1
chr1.26247901.26248200	13
chr1.26360101.26360400	12
chr1.26364001.26364300	22
chr1.26435101.26435400	2
chr1.26490901.26491200	2
chr1.26491201.26491500	4
chr1.26496901.26497200	21
chr1.26497501.26497800	10
chr1.26497801.26498100	1
chr1.26498401.26498700	4
chr1.26553301.26553600	22
chr1.26562301.26562600	2
chr1.26672701.26673000	1
chr1.26688301.26688600	4
chr1.26828101.26828400	4
chr1.27001.27300	2
chr1.2704201.2704500	2
chr1.2707501.2707800	1
chr1.27144001.27144300	1
chr1.27152101.27152400	6
chr1.27152401.27152700	3
chr1.2715901.2716200	3
chr1.27227701.27228000	1
chr1.27228001.27228300	13
chr1.27287701.27288000	1
chr1.27332701.27333000	1
chr1.27333001.27333300	1
chr1.27339601.27339900	3
chr1.27340201.27340500	6
chr1.27353401.27353700	3
chr1.27353701.27354000	7
chr1.27480601.27480900	20
chr1.27483001.27483300	6
chr1.27525901.27526200	1
chr1.27526201.27526500	61
chr1.27528001.27528300	17
chr1.27675601.27675900	14
chr1.27676201.27676500	13
chr1.27676501.27676800	11
chr1.27683701.27684000	1
chr1.27684601.27684900	1
chr1.27687301.27687600	2
chr1.27687601.27687900	4
chr1.27687901.27688200	2
chr1.27690601.27690900	1
chr1.27708901.27709200	1
chr1.2778601.2778900	3
chr1.2778901.2779200	1
chr1.27855901.27856200	3
chr1.27891301.27891600	4
chr1.27894001.27894300	1
chr1.27939901.27940200	1
chr1.27940801.27941100	2
chr1.27941101.27941400	2
chr1.27962701.27963000	2
chr1.27995101.27995400	1
chr1.28050601.28050900	1
chr1.28050901.28051200	5
chr1.28098301.28098600	17
chr1.28189501.28189800	53
chr1.28197301.28197600	5
chr1.28239601.28239900	7
chr1.28242301.28242600	1
chr1.2826901.2827200	2
chr1.2827201.2827500	21
chr1.28284901.28285200	1
chr1.2829601.2829900	2
chr1.28415401.28415700	17
chr1.28416301.28416600	2
chr1.28416901.28417200	2
chr1.28440901.28441200	6
chr1.2846701.2847000	3
chr1.28481101.28481400	1
chr1.2848501.2848800	16
chr1.28488301.28488600	5
chr1.2850601.2850900	1
chr1.28558201.28558500	1
chr1.28572301.28572600	2
chr1.28584001.28584300	43
chr1.28588801.28589100	83
chr1.28641601.28641900	11
chr1.28641901.28642200	1
chr1.28656601.28656900	9
chr1.28697401.28697700	3
chr1.28842601.28842900	12
chr1.2884501.2884800	15
chr1.28855501.28855800	1
chr1.28856701.28857000	1
chr1.28857001.28857300	1
chr1.2886301.2886600	2
chr1.2886601.2886900	3
chr1.28880701.28881000	12
chr1.28881001.28881300	35
chr1.2888401.2888700	14
chr1.28917001.28917300	9
chr1.28970401.28970700	1
chr1.29062501.29062800	4
chr1.29102701.29103000	19
chr1.29139901.29140200	7
chr1.2916901.2917200	2
chr1.2917801.2918100	4
chr1.29188501.29188800	1
chr1.29188801.29189100	3
chr1.29189101.29189400	1
chr1.29189401.29189700	2
chr1.29190301.29190600	9
chr1.2919301.2919600	75
chr1.2919601.2919900	1
chr1.29214901.29215200	11
chr1.29239801.29240100	1
chr1.2929801.2930100	3
chr1.2939701.2940000	2
chr1.29460901.29461200	8
chr1.29462401.29462700	49
chr1.29509201.29509500	13
chr1.29583601.29583900	44
chr1.29807101.29807400	1
chr1.2980801.2981100	11
chr1.2992201.2992500	1
chr1.2992501.2992800	46
chr1.2995801.2996100	2
chr1.2997001.2997300	2
chr1.2998801.2999100	2
chr1.3000001.3000300	1
chr1.3029701.3030000	1
chr1.3036301.3036600	2
chr1.3038701.3039000	6
chr1.3055501.3055800	2
chr1.3055801.3056100	2
chr1.3058201.3058500	3
chr1.3071701.3072000	7
chr1.3083101.3083400	1
chr1.3102001.3102300	3
chr1.31194601.31194900	1
chr1.31221301.31221600	5
chr1.31222201.31222500	1
chr1.31232701.31233000	4
chr1.31239001.31239300	6
chr1.3146401.3146700	1
chr1.3148501.3148800	37
chr1.3150001.3150300	2
chr1.31540501.31540800	56
chr1.3154801.3155100	7
chr1.3159001.3159300	12
chr1.3161701.3162000	3
chr1.31626001.31626300	1
chr1.31629601.31629900	2
chr1.3163201.3163500	1
chr1.3164401.3164700	2
chr1.3165901.3166200	15
chr1.3180901.3181200	122
chr1.31887301.31887600	2
chr1.31904401.31904700	107
chr1.31904701.31905000	122
chr1.3194101.3194400	2
chr1.3197401.3197700	1
chr1.3201901.3202200	2
chr1.3204301.3204600	11
chr1.32051101.32051400	3
chr1.32052301.32052600	7
chr1.32054101.32054400	3
chr1.32055901.32056200	2
chr1.32081701.32082000	2
chr1.32171101.32171400	47
chr1.32181901.32182200	2
chr1.32206801.32207100	2
chr1.32208601.32208900	1
chr1.32209201.32209500	3
chr1.32221501.32221800	2
chr1.32250601.32250900	8
chr1.3227701.3228000	5
chr1.3231601.3231900	6
chr1.3239401.3239700	1
chr1.3240001.3240300	26
chr1.32576101.32576400	12
chr1.32646601.32646900	15
chr1.32646901.32647200	2
chr1.32647801.32648100	11
chr1.32669401.32669700	10
chr1.32688901.32689200	1
chr1.3269101.3269400	6
chr1.32714701.32715000	2
chr1.3273901.3274200	1
chr1.32741101.32741400	1
chr1.3276001.3276300	14
chr1.3279001.3279300	1
chr1.32815201.32815500	1
chr1.32816101.32816400	25
chr1.32826301.32826600	1
chr1.32829001.32829300	2
chr1.3290401.3290700	13
chr1.32928601.32928900	1
chr1.32931601.32931900	5
chr1.3304801.3305100	7
chr1.3307501.3307800	30
chr1.3307801.3308100	1
chr1.3309901.3310200	56
chr1.3310201.3310500	10
chr1.3310501.3310800	67
chr1.33114301.33114600	36
chr1.33166801.33167100	1
chr1.3320701.3321000	1
chr1.3321001.3321300	2
chr1.33218701.33219000	1
chr1.33219901.33220200	23
chr1.33220201.33220500	100
chr1.3322501.3322800	2
chr1.33232501.33232800	1
chr1.33236701.33237000	1
chr1.3325801.3326100	1
chr1.3326101.3326400	1
chr1.3327001.3327300	14
chr1.33360901.33361200	24
chr1.33367501.33367800	10
chr1.3339901.3340200	10
chr1.3340201.3340500	25
chr1.33439501.33439800	1
chr1.3349501.3349800	3
chr1.33504001.33504300	1
chr1.33516901.33517200	100
chr1.33517201.33517500	5
chr1.33517801.33518100	1
chr1.33525901.33526200	7
chr1.3353401.3353700	4
chr1.33545401.33545700	5
chr1.33612901.33613200	2
chr1.33622501.33622800	30
chr1.33626401.33626700	1
chr1.3372001.3372300	8
chr1.3372301.3372600	2
chr1.3373501.3373800	1
chr1.33741301.33741600	3
chr1.33747301.33747600	1
chr1.33772501.33772800	11
chr1.33898201.33898500	1
chr1.33939001.33939300	2
chr1.3394201.3394500	107
chr1.3396901.3397200	3
chr1.34091401.34091700	1
chr1.3420901.3421200	1
chr1.3423901.3424200	3
chr1.3428401.3428700	12
chr1.3428701.3429000	1
chr1.3429301.3429600	1
chr1.3434401.3434700	5
chr1.3435601.3435900	1
chr1.3435901.3436200	7
chr1.3445501.3445800	7
chr1.3446701.3447000	1
chr1.3457801.3458100	7
chr1.34627201.34627500	1
chr1.34628101.34628400	4
chr1.3499201.3499500	24
chr1.3501301.3501600	3
chr1.3510901.3511200	4
chr1.3511201.3511500	7
chr1.3512701.3513000	2
chr1.35226901.35227200	3
chr1.3525601.3525900	4
chr1.35258101.35258400	25
chr1.35330701.35331000	1
chr1.35334901.35335200	2
chr1.3538801.3539100	2
chr1.35398201.35398500	1
chr1.3543601.3543900	8
chr1.35440201.35440500	3
chr1.35440501.35440800	1
chr1.3555901.3556200	7
chr1.3557701.3558000	2
chr1.35584201.35584500	1
chr1.3561301.3561600	1
chr1.3570001.3570300	1
chr1.3570901.3571200	22
chr1.3571201.3571500	1
chr1.3571501.3571800	3
chr1.36038401.36038700	3
chr1.36038701.36039000	12
chr1.36039001.36039300	34
chr1.36039301.36039600	1
chr1.36040801.36041100	1
chr1.36042301.36042600	1
chr1.36045001.36045300	2
chr1.3606901.3607200	1
chr1.36172501.36172800	6
chr1.3621301.3621600	1
chr1.3625201.3625500	1
chr1.36271501.36271800	1
chr1.36272701.36273000	1
chr1.36553201.36553500	4
chr1.36591601.36591900	1
chr1.36591901.36592200	1
chr1.36613801.36614100	2
chr1.3662101.3662400	4
chr1.3662401.3662700	9
chr1.36641401.36641700	3
chr1.3664201.3664500	14
chr1.36642301.36642600	20
chr1.3664501.3664800	13
chr1.36715801.36716100	2
chr1.36787201.36787500	62
chr1.36787501.36787800	1
chr1.36790801.36791100	6
chr1.36805801.36806100	1
chr1.36807001.36807300	127
chr1.36814501.36814800	99
chr1.36849601.36849900	15
chr1.36861601.36861900	2
chr1.36916501.36916800	1
chr1.3731101.3731400	1
chr1.3732901.3733200	10
chr1.3733801.3734100	1
chr1.3776401.3776700	1
chr1.37784401.37784700	6
chr1.37785001.37785300	6
chr1.3791701.3792000	8
chr1.37981801.37982100	4
chr1.38010301.38010600	6
chr1.38018701.38019000	4
chr1.38022601.38022900	52
chr1.38060101.38060400	1
chr1.3808201.3808500	10
chr1.3808801.3809100	1
chr1.3810601.3810900	14
chr1.38134201.38134500	2
chr1.38158801.38159100	5
chr1.38216401.38216700	1
chr1.3823201.3823500	24
chr1.3824401.3824700	4
chr1.38257201.38257500	1
chr1.3826201.3826500	1
chr1.38272501.38272800	1
chr1.38391601.38391900	15
chr1.38456101.38456400	11
chr1.38456701.38457000	4
chr1.38459401.38459700	1
chr1.38463001.38463300	2
chr1.38513401.38513700	18
chr1.38573701.38574000	1
chr1.39045601.39045900	10
chr1.39323101.39323400	10
chr1.39326701.39327000	44
chr1.39546301.39546600	1
chr1.39955501.39955800	1
chr1.39958501.39958800	1
chr1.39959101.39959400	26
chr1.39982201.39982500	1
chr1.40043101.40043400	1
chr1.40148701.40149000	47
chr1.40149001.40149300	3
chr1.40202101.40202400	1
chr1.40238401.40238700	6
chr1.40331401.40331700	22
chr1.40350301.40350600	18
chr1.40350601.40350900	3
chr1.40369201.40369500	3
chr1.40565101.40565400	2
chr1.40597201.40597500	1
chr1.40598401.40598700	1
chr1.40600201.40600500	1
chr1.40600801.40601100	1
chr1.40601101.40601400	2
chr1.40606501.40606800	1
chr1.40626001.40626300	1
chr1.40767001.40767300	1
chr1.40768201.40768500	2
chr1.40768801.40769100	5
chr1.40769701.40770000	1
chr1.40770001.40770300	8
chr1.40975201.40975500	2
chr1.40976401.40976700	36
chr1.40976701.40977000	1
chr1.40996201.40996500	1
chr1.41116801.41117100	12
chr1.41121301.41121600	2
chr1.41155201.41155500	1
chr1.41164501.41164800	2
chr1.41250601.41250900	1
chr1.41281801.41282100	3
chr1.41304301.41304600	2
chr1.41305501.41305800	1
chr1.41325901.41326200	6
chr1.41350501.41350800	2
chr1.41481601.41481900	19
chr1.41484301.41484600	3
chr1.41825701.41826000	41
chr1.41887201.41887500	1
chr1.41887801.41888100	23
chr1.41889001.41889300	38
chr1.41889601.41889900	4
chr1.41891401.41891700	5
chr1.41994901.41995200	9
chr1.42164701.42165000	2
chr1.42249001.42249300	22
chr1.42354001.42354300	1
chr1.42385201.42385500	1
chr1.42385501.42385800	5
chr1.42502501.42502800	1
chr1.42921301.42921600	10
chr1.42923401.42923700	12
chr1.42927601.42927900	8
chr1.43203901.43204200	1
chr1.43206001.43206300	17
chr1.43250401.43250700	2
chr1.43352701.43353000	2
chr1.43405501.43405800	4
chr1.43405801.43406100	1
chr1.43422001.43422300	3
chr1.43425601.43425900	1
chr1.43471201.43471500	3
chr1.43473601.43473900	10
chr1.43532101.43532400	1
chr1.43532401.43532700	4
chr1.43535101.43535400	30
chr1.43612501.43612800	1
chr1.43615501.43615800	1
chr1.43736401.43736700	6
chr1.43737901.43738200	1
chr1.43772101.43772400	1
chr1.43814101.43814400	3
chr1.43815301.43815600	18
chr1.43815601.43815900	1
chr1.43823101.43823400	5
chr1.43825501.43825800	19
chr1.43830601.43830900	26
chr1.43857901.43858200	2
chr1.43917901.43918200	4
chr1.43998301.43998600	2
chr1.44031301.44031600	14
chr1.44054701.44055000	1
chr1.44055601.44055900	5
chr1.44056801.44057100	1
chr1.44057401.44057700	2
chr1.44058301.44058600	2
chr1.44061601.44061900	3
chr1.44062201.44062500	2
chr1.44069101.44069400	45
chr1.44069401.44069700	2
chr1.44069701.44070000	10
chr1.44070001.44070300	3
chr1.44070301.44070600	27
chr1.44114701.44115000	19
chr1.44115001.44115300	22
chr1.44380801.44381100	22
chr1.44381101.44381400	1
chr1.44430901.44431200	25
chr1.44436901.44437200	2
chr1.44494201.44494500	15
chr1.44823001.44823300	18
chr1.449101.449400	4
chr1.449401.449700	70
chr1.44973301.44973600	1
chr1.450601.450900	1
chr1.45120001.45120300	1
chr1.45189901.45190200	107
chr1.45191101.45191400	1
chr1.45204301.45204600	1
chr1.45240001.45240300	5
chr1.45249001.45249300	31
chr1.45263401.45263700	2
chr1.45270301.45270600	4
chr1.45278401.45278700	1
chr1.45279001.45279300	1
chr1.45284101.45284400	2
chr1.45286801.45287100	1
chr1.45308101.45308400	1
chr1.45963601.45963900	1
chr1.45989101.45989400	3
chr1.46014301.46014600	1
chr1.46014901.46015200	3
chr1.46015801.46016100	1
chr1.46087801.46088100	1
chr1.46088701.46089000	33
chr1.46089001.46089300	3
chr1.46091101.46091400	4
chr1.46217401.46217700	1
chr1.46266901.46267200	2
chr1.46631101.46631400	18
chr1.46631701.46632000	1
chr1.46667101.46667400	10
chr1.46706101.46706400	2
chr1.46707001.46707300	1
chr1.46707301.46707600	14
chr1.46707601.46707900	5
chr1.46770601.46770900	2
chr1.46806001.46806300	1
chr1.46860901.46861200	1
chr1.46940401.46940700	4
chr1.46950001.46950300	8
chr1.47078701.47079000	2
chr1.4726501.4726800	7
chr1.4726801.4727100	40
chr1.47488501.47488800	2
chr1.47489101.47489400	24
chr1.47694301.47694600	18
chr1.4770001.4770300	2
chr1.47782201.47782500	10
chr1.47800801.47801100	2
chr1.47883301.47883600	28
chr1.47898901.47899200	2
chr1.47899201.47899500	1
chr1.47913901.47914200	4
chr1.48000901.48001200	75
chr1.48024301.48024600	2
chr1.48058201.48058500	49
chr1.4832101.4832400	2
chr1.4833301.4833600	1
chr1.48458101.48458400	1
chr1.5023501.5023800	25
chr1.5033101.5033400	82
chr1.50489101.50489400	2
chr1.50490301.50490600	3
chr1.51383101.51383400	3
chr1.51810001.51810300	15
chr1.52342801.52343100	14
chr1.52508101.52508400	3
chr1.53068801.53069100	1
chr1.53387701.53388000	1
chr1.53392501.53392800	1
chr1.53394001.53394300	2
chr1.53394301.53394600	2
chr1.53528401.53528700	57
chr1.53541901.53542200	1
chr1.53542801.53543100	1
chr1.53544601.53544900	12
chr1.53546101.53546400	6
chr1.53556601.53556900	3
chr1.53560201.53560500	5
chr1.53589301.53589600	2
chr1.53740501.53740800	1
chr1.53742001.53742300	1
chr1.53743201.53743500	2
chr1.53905801.53906100	1
chr1.53925301.53925600	1
chr1.54127201.54127500	5
chr1.54141301.54141600	5
chr1.54205801.54206100	7
chr1.54699901.54700200	2
chr1.54726001.54726300	3
chr1.547801.548100	4
chr1.54807901.54808200	1
chr1.54822001.54822300	7
chr1.54855601.54855900	4
chr1.54856201.54856500	2
chr1.54925201.54925500	3
chr1.54966301.54966600	1
chr1.55009501.55009800	34
chr1.55231201.55231500	1
chr1.55246201.55246500	1
chr1.55266001.55266300	1
chr1.55266301.55266600	6
chr1.55268101.55268400	17
chr1.55271401.55271700	1
chr1.55464301.55464600	3
chr1.55464601.55464900	9
chr1.55507801.55508100	7
chr1.57024601.57024900	43
chr1.5772301.5772600	1
chr1.5772901.5773200	10
chr1.58716001.58716300	5
chr1.59010601.59010900	1
chr1.59041801.59042100	3
chr1.59042101.59042400	1
chr1.59043001.59043300	7
chr1.5935201.5935500	1
chr1.59370601.59370900	1
chr1.5937601.5937900	1
chr1.5938201.5938500	1
chr1.59395201.59395500	1
chr1.60174901.60175200	1
chr1.6034801.6035100	8
chr1.6050101.6050400	3
chr1.6084901.6085200	2
chr1.6111601.6111900	1
chr1.6112501.6112800	4
chr1.6131101.6131400	2
chr1.61369201.61369500	1
chr1.61507501.61507800	3
chr1.61517701.61518000	2
chr1.61579501.61579800	2
chr1.6186001.6186300	19
chr1.6187201.6187500	1
chr1.6188101.6188400	3
chr1.6188701.6189000	25
chr1.6200701.6201000	1
chr1.6203401.6203700	10
chr1.62056801.62057100	5
chr1.6208801.6209100	65
chr1.6209401.6209700	1
chr1.6209701.6210000	21
chr1.6210001.6210300	1
chr1.62120101.62120400	44
chr1.62189701.62190000	4
chr1.62191801.62192100	3
chr1.62192101.62192400	2
chr1.6242101.6242400	1
chr1.6242701.6243000	4
chr1.62609401.62609700	2
chr1.6265501.6265800	2
chr1.62660101.62660400	3
chr1.6268501.6268800	1
chr1.6270001.6270300	20
chr1.6270301.6270600	1
chr1.62773501.62773800	1
chr1.62784001.62784300	1
chr1.62785501.62785800	2
chr1.62785801.62786100	6
chr1.6294601.6294900	11
chr1.6294901.6295200	2
chr1.6310501.6310800	5
chr1.6322501.6322800	4
chr1.6338701.6339000	20
chr1.6339001.6339300	1
chr1.6369901.6370200	15
chr1.63782401.63782700	2
chr1.63790201.63790500	2
chr1.63834001.63834300	9
chr1.6487201.6487500	3
chr1.64972201.64972500	1
chr1.6520501.6520800	1
[truncated: 23,269 more rows]

## Sheet: 10_6_RCC
DMR	N_of_occurrence
chr1.10001401.10001700	1
chr1.1003501.1003800	20
chr1.100501501.100501800	4
chr1.10058701.10059000	1
chr1.10059301.10059600	1
chr1.100597201.100597500	2
chr1.100599601.100599900	3
chr1.100679101.100679400	1
chr1.100815601.100815900	13
chr1.100827301.100827600	11
chr1.10091701.10092000	26
chr1.1010401.1010700	6
chr1.1011001.1011300	4
chr1.1011301.1011600	45
chr1.1011601.1011900	55
chr1.1011901.1012200	1
chr1.1012501.1012800	26
chr1.1012801.1013100	106
chr1.1013101.1013400	6
chr1.1013401.1013700	122
chr1.1013701.1014000	32
chr1.1014001.1014300	96
chr1.1014301.1014600	1
chr1.1016101.1016400	6
chr1.1020001.1020300	1
chr1.1020601.1020900	1
chr1.10268701.10269000	38
chr1.10269001.10269300	6
chr1.1029601.1029900	1
chr1.10458301.10458600	2
chr1.10488001.10488300	5
chr1.1048801.1049100	1
chr1.10491601.10491900	13
chr1.1050001.1050300	2
chr1.1053001.1053300	8
chr1.10530901.10531200	1
chr1.10534501.10534800	2
chr1.10536901.10537200	2
chr1.10556401.10556700	4
chr1.10557301.10557600	21
chr1.10559401.10559700	2
chr1.10697401.10697700	2
chr1.10697701.10698000	1
chr1.10698901.10699200	16
chr1.10700101.10700400	1
chr1.10702801.10703100	3
chr1.10703101.10703400	1
chr1.10707001.10707300	1
chr1.10707601.10707900	4
chr1.10712401.10712700	1
chr1.10713001.10713300	5
chr1.1071901.1072200	14
chr1.10721401.10721700	1
chr1.10722001.10722300	1
chr1.10723501.10723800	1
chr1.10753201.10753500	13
chr1.10762201.10762500	5
chr1.10765501.10765800	2
chr1.10816201.10816500	2
chr1.108199501.108199800	1
chr1.10821301.10821600	1
chr1.108509401.108509700	1
chr1.108595501.108595800	5
chr1.108735601.108735900	1
chr1.109422001.109422300	2
chr1.109585801.109586100	6
chr1.1095901.1096200	3
chr1.109616401.109616700	9
chr1.109616701.109617000	12
chr1.109617301.109617600	2
chr1.109620001.109620300	13
chr1.109631101.109631400	1
chr1.109632001.109632300	15
chr1.109643701.109644000	4
chr1.109645201.109645500	46
chr1.109797601.109797900	15
chr1.1098001.1098300	1
chr1.109827601.109827900	2
chr1.109842301.109842600	1
chr1.109967401.109967700	4
chr1.1100401.1100700	38
chr1.110196301.110196600	1
chr1.110199301.110199600	1
chr1.110211601.110211900	49
chr1.110578501.110578800	1
chr1.110610001.110610300	22
chr1.1107301.1107600	13
chr1.11074801.11075100	51
chr1.1107601.1107900	102
chr1.110947801.110948100	6
chr1.110949001.110949300	1
chr1.1111201.1111500	1
chr1.111151201.111151500	5
chr1.11118601.11118900	1
chr1.11121001.11121300	5
chr1.1112101.1112400	2
chr1.111321901.111322200	10
chr1.1115401.1115700	1
chr1.111815701.111816000	12
chr1.112283101.112283400	4
chr1.112284901.112285200	1
chr1.113007301.113007600	24
chr1.113049601.113049900	1
chr1.1131601.1131900	93
chr1.113163901.113164200	1
chr1.11320801.11321100	4
chr1.11324101.11324400	13
chr1.113286301.113286600	4
chr1.1133101.1133400	2
chr1.113392801.113393100	2
chr1.1134901.1135200	1
chr1.113499301.113499600	5
chr1.113499601.113499900	12
chr1.113613301.113613600	23
chr1.113675401.113675700	1
chr1.113741401.113741700	1
chr1.11392801.11393100	3
chr1.1140601.1140900	5
chr1.114355501.114355800	10
chr1.114445801.114446100	1
chr1.114469801.114470100	7
chr1.1144801.1145100	1
chr1.1149601.1149900	20
chr1.1151401.1151700	2
chr1.1152301.1152600	1
chr1.1153501.1153800	2
chr1.115396201.115396500	2
chr1.115396801.115397100	2
chr1.1154101.1154400	1
chr1.115445401.115445700	1
chr1.11559901.11560200	4
chr1.1158601.1158900	1
chr1.11588401.11588700	7
chr1.1158901.1159200	1
chr1.11591101.11591400	4
chr1.11592001.11592300	4
chr1.11594701.11595000	7
chr1.11598301.11598600	3
chr1.1164001.1164300	3
chr1.1165501.1165800	1
chr1.116710201.116710500	26
chr1.116711701.116712000	9
chr1.116913901.116914200	2
chr1.1169401.1169700	7
chr1.116961601.116961900	2
chr1.116961901.116962200	1
chr1.117075601.117075900	108
chr1.11708401.11708700	2
chr1.11708701.11709000	2
chr1.11712001.11712300	2
chr1.11713801.11714100	1
chr1.117285301.117285600	1
chr1.1173001.1173300	8
chr1.117450901.117451200	1
chr1.1174801.1175100	36
chr1.117486901.117487200	3
chr1.11748901.11749200	1
chr1.1175101.1175400	1
chr1.117666301.117666600	1
chr1.11777401.11777700	2
chr1.118146901.118147200	3
chr1.118147201.118147500	1
chr1.11821201.11821500	29
chr1.11823001.11823300	2
chr1.1187701.1188000	6
chr1.1189501.1189800	13
chr1.11898601.11898900	81
chr1.11899801.11900100	3
chr1.119523301.119523600	14
chr1.119526301.119526600	32
chr1.119529901.119530200	1
chr1.11983801.11984100	7
chr1.11995801.11996100	4
chr1.120164701.120165000	7
chr1.120166501.120166800	1
chr1.120166801.120167100	4
chr1.1203001.1203300	2
chr1.12038401.12038700	2
chr1.1203901.1204200	3
chr1.12041401.12041700	3
chr1.120439201.120439500	1
chr1.120439501.120439800	2
chr1.1204501.1204800	1
chr1.1207201.1207500	28
chr1.12079201.12079500	3
chr1.12081001.12081300	2
chr1.120903001.120903300	4
chr1.1210501.1210800	3
chr1.121140901.121141200	1
chr1.12122101.12122400	3
chr1.121259701.121260000	5
chr1.12228901.12229200	1
chr1.1227901.1228200	1
chr1.12291901.12292200	2
chr1.1231201.1231500	3
chr1.1232101.1232400	3
chr1.1247701.1248000	16
chr1.1254901.1255200	1
chr1.1255501.1255800	5
chr1.1257601.1257900	2
chr1.12579001.12579300	1
chr1.12600601.12600900	12
chr1.12601201.12601500	8
chr1.12609601.12609900	1
chr1.1262401.1262700	69
chr1.12657001.12657300	1
chr1.1265701.1266000	1
chr1.1269001.1269300	2
chr1.1270501.1270800	1
chr1.12717901.12718200	31
chr1.1287601.1287900	4
chr1.1292401.1292700	3
chr1.1296001.1296300	1
chr1.1308001.1308300	26
chr1.1308301.1308600	2
chr1.1311301.1311600	1
chr1.1320601.1320900	13
chr1.1320901.1321200	39
chr1.1323301.1323600	1
chr1.1323601.1323900	2
chr1.132901.133200	1
chr1.1332001.1332300	2
chr1.133501.133800	4
chr1.1344001.1344300	1
chr1.134701.135000	10
chr1.1354801.1355100	1
chr1.1356901.1357200	1
chr1.1357801.1358100	1
chr1.1361101.1361400	4
chr1.13879501.13879800	1
chr1.13881001.13881300	8
chr1.1388701.1389000	22
chr1.1390501.1390800	1
chr1.1391401.1391700	23
chr1.13920001.13920300	1
chr1.1395901.1396200	26
chr1.1397701.1398000	4
chr1.1404901.1405200	1
chr1.1413301.1413600	4
chr1.1419001.1419300	2
chr1.142536301.142536600	1
chr1.142539301.142539600	23
chr1.142617901.142618200	6
chr1.142618501.142618800	1
chr1.142891501.142891800	1
chr1.142892401.142892700	5
chr1.143270701.143271000	1
chr1.143467201.143467500	2
chr1.143663701.143664000	57
chr1.143666101.143666400	1
chr1.1445101.1445400	1
chr1.144531601.144531900	4
chr1.144591601.144591900	4
chr1.144591901.144592200	3
chr1.145076101.145076400	3
chr1.145076401.145076700	437
chr1.145092601.145092900	7
chr1.145095601.145095900	12
chr1.1452301.1452600	4
chr1.1452601.1452900	3
chr1.145380601.145380900	4
chr1.1454101.1454400	1
chr1.145469101.145469400	3
chr1.145508701.145509000	5
chr1.145587601.145587900	3
chr1.145609501.145609800	25
chr1.145943701.145944000	2
chr1.145944001.145944300	11
chr1.145945501.145945800	2
chr1.145962301.145962600	2
chr1.1459801.1460100	4
chr1.145980301.145980600	1
chr1.145992001.145992300	1
chr1.146092801.146093100	4
chr1.1463101.1463400	1
chr1.1464901.1465200	1
chr1.146544001.146544300	2
chr1.146544601.146544900	1
chr1.146544901.146545200	4
chr1.146546401.146546700	2
chr1.146642401.146642700	1
chr1.147380401.147380700	15
chr1.147486301.147486600	10
chr1.147487501.147487800	50
chr1.147531001.147531300	1
chr1.147531601.147531900	3
chr1.1476001.1476300	17
chr1.147621301.147621600	1
chr1.147634801.147635100	4
chr1.147717301.147717600	3
chr1.147718501.147718800	53
chr1.147737401.147737700	7
chr1.1477501.1477800	1
chr1.147753301.147753600	6
chr1.147775801.147776100	8
chr1.147776101.147776400	2
chr1.147788401.147788700	7
chr1.147791401.147791700	1
chr1.147827101.147827400	1
chr1.147991801.147992100	2
chr1.147992101.147992400	1
chr1.147997801.147998100	4
chr1.148246801.148247100	5
chr1.148249201.148249500	2
chr1.148249501.148249800	3
chr1.148602301.148602600	3
chr1.148602901.148603200	1
chr1.148761901.148762200	21
chr1.148764601.148764900	67
chr1.148851901.148852200	15
chr1.148852201.148852500	1
chr1.148853401.148853700	2
chr1.148854601.148854900	1
chr1.148864501.148864800	10
chr1.148864801.148865100	19
chr1.148902001.148902300	1
chr1.1489201.1489500	1
chr1.1489501.1489800	5
chr1.1489801.1490100	11
chr1.149029201.149029500	79
chr1.149136901.149137200	1
chr1.149161501.149161800	14
chr1.149222701.149223000	56
chr1.149232601.149232900	1
chr1.149287201.149287500	1
chr1.149289001.149289300	1
chr1.149332801.149333100	6
chr1.149333101.149333400	10
chr1.149333701.149334000	6
chr1.149334001.149334300	24
chr1.1494901.1495200	1
chr1.149516401.149516700	1
chr1.1496401.1496700	2
chr1.149646301.149646600	27
chr1.149671201.149671500	25
chr1.149671501.149671800	6
chr1.149672701.149673000	1
chr1.149673301.149673600	4
chr1.149718301.149718600	39
chr1.149718901.149719200	4
chr1.149719501.149719800	21
chr1.149765401.149765700	28
chr1.149783401.149783700	1
chr1.149810101.149810400	1
chr1.149873101.149873400	1
chr1.149873401.149873700	1
chr1.1498801.1499100	2
chr1.150154501.150154800	95
chr1.150185101.150185400	4
chr1.150187501.150187800	1
chr1.150209401.150209700	12
chr1.150252901.150253200	1
chr1.150255901.150256200	1
chr1.150265201.150265500	2
chr1.150266701.150267000	14
chr1.150292201.150292500	1
chr1.150293401.150293700	3
chr1.150486601.150486900	4
chr1.150487201.150487500	8
chr1.150524101.150524400	28
chr1.150529201.150529500	5
chr1.150531001.150531300	9
chr1.150602701.150603000	1
chr1.1507501.1507800	1
chr1.1507801.1508100	5
chr1.150849901.150850200	5
chr1.151044001.151044300	2
chr1.151104601.151104900	8
chr1.151105801.151106100	1
chr1.151107301.151107600	17
chr1.151184701.151185000	29
chr1.15127201.15127500	5
chr1.15128101.15128400	13
chr1.15128401.15128700	2
chr1.151511101.151511400	3
chr1.151583101.151583400	7
chr1.151737901.151738200	1
chr1.151966801.151967100	3
chr1.152010001.152010300	1
chr1.15253501.15253800	2
chr1.1533901.1534200	2
chr1.153604501.153604800	19
chr1.153604801.153605100	1
chr1.153607501.153607800	2
chr1.153629701.153630000	1
chr1.153633001.153633300	2
chr1.153652501.153652800	1
chr1.153653101.153653400	3
chr1.153654001.153654300	2
chr1.153663001.153663300	1
chr1.1536901.1537200	2
chr1.153699601.153699900	14
chr1.153701701.153702000	2
chr1.153704401.153704700	12
chr1.15373501.15373800	2
chr1.153745501.153745800	3
chr1.153754201.153754500	17
chr1.153754501.153754800	1
chr1.153762301.153762600	2
chr1.15377401.15377700	1
chr1.153916501.153916800	2
chr1.153951901.153952200	6
chr1.154155601.154155900	2
chr1.154156201.154156500	1
chr1.154156501.154156800	1
chr1.154246501.154246800	1
chr1.154475401.154475700	12
chr1.154733701.154734000	2
chr1.154744801.154745100	1
chr1.154761001.154761300	21
chr1.154785901.154786200	3
chr1.1548301.1548600	7
chr1.1548601.1548900	1
chr1.154899901.154900200	2
chr1.154931701.154932000	3
chr1.154987501.154987800	8
chr1.154988701.154989000	35
chr1.154998001.154998300	1
chr1.155035201.155035500	19
chr1.155035501.155035800	20
chr1.155038201.155038500	1
chr1.155064901.155065200	1
chr1.155098201.155098500	1
chr1.155098801.155099100	1
chr1.155106301.155106600	1
chr1.155161801.155162100	1
chr1.155219701.155220000	2
chr1.155226001.155226300	1
chr1.155226301.155226600	2
chr1.155241901.155242200	5
chr1.155244601.155244900	2
chr1.155264401.155264700	8
chr1.155264701.155265000	7
chr1.155267401.155267700	1
chr1.155276401.155276700	2
chr1.15540001.15540300	2
chr1.155534101.155534400	2
chr1.155578201.155578500	1
chr1.155579101.155579400	1
chr1.155582101.155582400	9
chr1.155659501.155659800	34
chr1.155713501.155713800	1
chr1.15573301.15573600	4
chr1.155919001.155919300	52
chr1.155988301.155988600	1
chr1.155991301.155991600	10
chr1.156048901.156049200	2
chr1.156049201.156049500	2
chr1.156086701.156087000	3
chr1.156095101.156095400	1
chr1.156104401.156104700	1
chr1.156105601.156105900	4
chr1.156186601.156186900	5
chr1.156214201.156214500	1
chr1.156261001.156261300	32
chr1.156261301.156261600	42
chr1.156306601.156306900	2
chr1.156308701.156309000	13
chr1.156310201.156310500	1
chr1.156388201.156388500	1
chr1.156426001.156426300	1
chr1.156427501.156427800	1
chr1.156471601.156471900	18
chr1.1564801.1565100	1
chr1.15649501.15649800	1
chr1.156617101.156617400	24
chr1.15664801.15665100	1
chr1.156739201.156739500	1
chr1.1567501.1567800	2
chr1.1567801.1568100	18
chr1.156816601.156816900	4
chr1.1568701.1569000	1
chr1.156876001.156876300	2
chr1.156877501.156877800	2
chr1.156877801.156878100	4
chr1.156878701.156879000	2
chr1.156880501.156880800	5
chr1.156966301.156966600	2
chr1.156966601.156966900	6
chr1.157014301.157014600	1
chr1.157243201.157243500	2
chr1.157245001.157245300	5
chr1.157245901.157246200	15
chr1.157948801.157949100	2
chr1.157965601.157965900	4
chr1.1580101.1580400	1
chr1.158083801.158084100	1
chr1.158118901.158119200	1
chr1.15909301.15909600	4
chr1.15910501.15910800	2
chr1.15912301.15912600	3
chr1.15913501.15913800	1
chr1.15942301.15942600	1
chr1.15946201.15946500	1
chr1.159792901.159793200	27
chr1.159869101.159869400	5
chr1.159900601.159900900	35
chr1.159999301.159999600	38
chr1.160054501.160054800	8
chr1.1600801.1601100	3
chr1.16009201.16009500	13
chr1.1603201.1603500	14
chr1.160340101.160340400	2
chr1.160341001.160341300	3
chr1.160369801.160370100	1
chr1.160389001.160389300	9
chr1.160389301.160389600	12
chr1.16069801.16070100	1
chr1.160769701.160770000	1
chr1.160771801.160772100	18
chr1.160881001.160881300	4
chr1.161148901.161149200	5
chr1.161149201.161149500	1
chr1.161227801.161228100	2
chr1.161361301.161361600	1
chr1.161367001.161367300	1
chr1.161410501.161410800	1
chr1.161410801.161411100	6
chr1.161412601.161412900	10
chr1.161412901.161413200	8
chr1.161418301.161418600	23
chr1.161424001.161424300	1
chr1.161424301.161424600	1
chr1.161424601.161424900	2
chr1.161424901.161425200	4
chr1.161425801.161426100	2
chr1.161433001.161433300	1
chr1.161433601.161433900	1
chr1.161439301.161439600	2
chr1.161440501.161440800	5
chr1.161440801.161441100	1
chr1.161441101.161441400	3
chr1.161442301.161442600	5
chr1.161575501.161575800	1
chr1.161583001.161583300	5
chr1.161720701.161721000	2
chr1.16172401.16172700	1
chr1.161953501.161953800	2
chr1.161994901.161995200	1
chr1.1622101.1622400	1
chr1.162337201.162337500	3
chr1.162339001.162339300	1
chr1.162533101.162533400	1
chr1.1626901.1627200	1
chr1.16270501.16270800	14
chr1.16278001.16278300	1
chr1.16304401.16304700	3
chr1.16342501.16342800	1
chr1.16401301.16401600	1
chr1.164290801.164291100	1
chr1.1643401.1643700	3
chr1.164580901.164581200	3
chr1.16462801.16463100	1
chr1.16463101.16463400	12
chr1.16465201.16465500	1
chr1.16473001.16473300	14
chr1.16474501.16474800	3
chr1.16475701.16476000	14
chr1.16479301.16479600	9
chr1.16492801.16493100	5
chr1.16493701.16494000	9
chr1.16500301.16500600	2
chr1.165085501.165085800	6
chr1.16531501.16531800	1
chr1.16532401.16532700	35
chr1.165324601.165324900	2
chr1.16541701.16542000	7
chr1.1654201.1654500	1
chr1.1654801.1655100	1
chr1.16554001.16554300	59
chr1.16554301.16554600	37
chr1.16554901.16555200	7
chr1.16561501.16561800	1
chr1.16565401.16565700	3
chr1.16565701.16566000	28
chr1.16668901.16669200	1
chr1.16676401.16676700	4
chr1.166847701.166848000	1
chr1.166957201.166957500	16
chr1.167135401.167135700	1
chr1.1671901.1672200	1
chr1.167421901.167422200	2
chr1.167434501.167434800	1
chr1.167458801.167459100	30
chr1.1675201.1675500	26
chr1.16765801.16766100	2
chr1.167682001.167682300	1
chr1.16768801.16769100	1
chr1.168025201.168025500	1
chr1.16809601.16809900	4
chr1.168104101.168104400	6
chr1.16811101.16811400	1
chr1.16812001.16812300	8
chr1.16826101.16826400	5
chr1.1683901.1684200	7
chr1.16839301.16839600	3
chr1.16847101.16847400	7
chr1.16847401.16847700	1
chr1.16847701.16848000	1
chr1.16849801.16850100	97
chr1.16861501.16861800	48
chr1.16861801.16862100	5
chr1.1686901.1687200	3
chr1.1687201.1687500	1
chr1.169074001.169074300	9
chr1.1692301.1692600	1
chr1.1692601.1692900	6
chr1.16941601.16941900	2
chr1.16969201.16969500	13
chr1.16974001.16974300	6
chr1.16974301.16974600	19
chr1.16975801.16976100	27
chr1.16976401.16976700	35
chr1.16983601.16983900	1
chr1.16984801.16985100	3
chr1.17006401.17006700	11
chr1.17007001.17007300	188
chr1.17007901.17008200	1
chr1.17016601.17016900	18
chr1.17018701.17019000	2
chr1.17019001.17019300	30
chr1.17019301.17019600	1
chr1.17019901.17020200	1
chr1.17020801.17021100	4
chr1.17025901.17026200	2
chr1.17026201.17026500	1
chr1.17026801.17027100	4
chr1.170634901.170635200	1
chr1.17064901.17065200	2
chr1.17067901.17068200	35
chr1.17076601.17076900	1
chr1.17084101.17084400	1
chr1.17085301.17085600	5
chr1.17085901.17086200	2
chr1.17086501.17086800	8
chr1.17087401.17087700	2
chr1.1715101.1715400	1
chr1.171639901.171640200	6
chr1.171640501.171640800	2
chr1.171753301.171753600	7
chr1.17186101.17186400	1
chr1.17199901.17200200	25
chr1.17200201.17200500	2
chr1.17200501.17200800	2
chr1.17223601.17223900	2
chr1.172324801.172325100	1
chr1.17280001.17280300	1
chr1.17281201.17281500	20
chr1.17282701.17283000	5
chr1.172902901.172903200	4
chr1.17292301.17292600	5
chr1.17292601.17292900	6
chr1.17308501.17308800	5
chr1.17308801.17309100	1
chr1.17330401.17330700	18
chr1.17381101.17381400	90
chr1.17381401.17381700	6
chr1.17382301.17382600	2
chr1.17446801.17447100	5
chr1.17447401.17447700	139
chr1.17475901.17476200	29
chr1.17476201.17476500	35
chr1.175048201.175048500	1
chr1.17518801.17519100	2
chr1.175546801.175547100	2
chr1.175547101.175547400	14
chr1.175568101.175568400	9
chr1.175568401.175568700	3
chr1.17734501.17734800	2
chr1.17736001.17736300	6
chr1.17747701.17748000	3
chr1.17748301.17748600	1
chr1.17762101.17762400	15
chr1.178008001.178008300	12
chr1.178509901.178510200	1
chr1.178512601.178512900	36
chr1.178513201.178513500	1
chr1.178514101.178514400	9
chr1.178548901.178549200	1
chr1.178550401.178550700	1
chr1.178993801.178994100	75
chr1.178994101.178994400	29
chr1.178994401.178994700	1
chr1.178997401.178997700	18
chr1.179049601.179049900	10
chr1.179145001.179145300	1
chr1.179336101.179336400	4
chr1.17947501.17947800	5
chr1.17949301.17949600	5
chr1.179556001.179556300	1
chr1.179561701.179562000	1
chr1.179607001.179607300	2
chr1.17962501.17962800	1
chr1.179714101.179714400	16
chr1.179714401.179714700	1
chr1.180883801.180884100	7
chr1.180921601.180921900	2
chr1.180922201.180922500	1
chr1.182109301.182109600	1
chr1.1823701.1824000	1
chr1.182760301.182760600	12
chr1.182807401.182807700	1
chr1.182990101.182990400	25
chr1.183386101.183386400	1
chr1.183549601.183549900	1
chr1.1839301.1839600	1
chr1.1840801.1841100	1
chr1.1841401.1841700	53
chr1.18448501.18448800	1
chr1.18448801.18449100	6
chr1.184633801.184634100	1
chr1.184634101.184634400	1
chr1.184725601.184725900	2
chr1.184940401.184940700	3
chr1.1851601.1851900	20
chr1.1851901.1852200	22
chr1.185344501.185344800	9
chr1.185508301.185508600	4
chr1.1858501.1858800	1
chr1.186625201.186625500	1
chr1.18692101.18692400	16
chr1.186975901.186976200	4
chr1.18702901.18703200	3
chr1.1874401.1874700	3
chr1.18807301.18807600	3
chr1.1884601.1884900	1
chr1.1887601.1887900	6
chr1.1888501.1888800	1
chr1.1888801.1889100	2
chr1.1896301.1896600	19
chr1.1908601.1908900	2
chr1.1909801.1910100	15
chr1.19110601.19110900	1
chr1.1913401.1913700	4
chr1.1913701.1914000	165
chr1.19182301.19182600	33
chr1.19204201.19204500	11
chr1.19211401.19211700	4
chr1.19211701.19212000	1
chr1.192469501.192469800	10
chr1.192583201.192583500	1
chr1.192778801.192779100	30
chr1.193027201.193027500	14
chr1.193030801.193031100	1
chr1.193075801.193076100	14
chr1.19360201.19360500	1
chr1.1936501.1936800	1
chr1.1937101.1937400	2
chr1.1951801.1952100	1
chr1.1952401.1952700	4
chr1.1952701.1953000	11
chr1.1955401.1955700	3
chr1.1957501.1957800	1
chr1.1959001.1959300	1
chr1.1959301.1959600	16
chr1.19601701.19602000	2
chr1.1960801.1961100	4
chr1.19612801.19613100	1
chr1.19614301.19614600	2
chr1.196379701.196380000	22
chr1.19664101.19664400	4
chr1.19666501.19666800	77
chr1.196845901.196846200	1
chr1.1974301.1974600	3
chr1.19779001.19779300	1
chr1.197892301.197892600	42
chr1.19813801.19814100	1
chr1.1983001.1983300	1
chr1.1989601.1989900	1
chr1.1991401.1991700	2
chr1.1992301.1992600	4
chr1.1992901.1993200	1
chr1.19968301.19968600	1
chr1.19968901.19969200	7
chr1.19992901.19993200	41
chr1.200005501.200005800	6
chr1.200116201.200116500	1
chr1.200272201.200272500	16
chr1.2003701.2004000	1
chr1.2004001.2004300	4
chr1.2005801.2006100	13
chr1.200591701.200592000	1
chr1.2006401.2006700	5
chr1.200715901.200716200	9
chr1.200839501.200839800	2
chr1.200840101.200840400	2
chr1.200841301.200841600	3
chr1.200841601.200841900	10
chr1.200841901.200842200	1
chr1.200842501.200842800	5
chr1.200843101.200843400	23
chr1.200843701.200844000	6
chr1.200968201.200968500	12
chr1.200969101.200969400	2
chr1.200969401.200969700	5
chr1.200970001.200970300	5
chr1.201160801.201161100	1
chr1.201194701.201195000	4
chr1.201195901.201196200	1
chr1.20124301.20124600	8
chr1.201437101.201437400	1
chr1.201440401.201440700	9
chr1.201463801.201464100	2
chr1.201611401.201611700	6
chr1.201924001.201924300	2
chr1.201927001.201927300	31
chr1.202030201.202030500	10
chr1.202053901.202054200	4
chr1.20206801.20207100	2
chr1.20207701.20208000	1
chr1.202077601.202077900	1
chr1.202160701.202161000	19
chr1.202217701.202218000	6
chr1.202324501.202324800	1
chr1.2027101.2027400	1
chr1.2027701.2028000	2
chr1.2028001.2028300	1
chr1.202856101.202856400	1
chr1.202856401.202856700	15
chr1.202996501.202996800	2
chr1.203061901.203062200	5
chr1.203097601.203097900	24
chr1.203097901.203098200	3
chr1.203276401.203276700	1
chr1.203455801.203456100	2
chr1.203457601.203457900	1
chr1.203457901.203458200	1
chr1.203524801.203525100	3
chr1.203526601.203526900	2
chr1.203735401.203735700	20
chr1.2037601.2037900	8
chr1.203763601.203763900	2
chr1.203794201.203794500	7
chr1.2038201.2038500	3
chr1.203832601.203832900	3
chr1.203869801.203870100	9
chr1.204058201.204058500	1
chr1.2040901.2041200	2
chr1.204122101.204122400	1
chr1.2043001.2043300	1
chr1.204382801.204383100	2
chr1.2046001.2046300	1
chr1.2047501.2047800	36
chr1.2047801.2048100	1
chr1.204949501.204949800	81
chr1.204961801.204962100	6
chr1.204962101.204962400	17
chr1.204976201.204976500	1
chr1.205038901.205039200	2
chr1.205041001.205041300	19
chr1.20505901.20506200	1
chr1.205144501.205144800	2
chr1.205211101.205211400	1
chr1.205238401.205238700	1
chr1.205238701.205239000	4
chr1.205239001.205239300	1
chr1.205262701.205263000	2
chr1.205291501.205291800	1
chr1.205314901.205315200	1
chr1.205315201.205315500	1
chr1.205415701.205416000	1
chr1.205498201.205498500	1
chr1.205500301.205500600	2
chr1.20569501.20569800	8
chr1.205784101.205784400	4
chr1.205819201.205819500	1
chr1.206221801.206222100	2
chr1.206223001.206223300	1
chr1.2063701.2064000	1
chr1.206641501.206641800	1
chr1.2066701.2067000	6
chr1.206683201.206683500	116
chr1.2067301.2067600	1
chr1.206844301.206844600	2
chr1.207064201.207064500	1
chr1.207080701.207081000	4
chr1.207081001.207081300	4
chr1.207083701.207084000	2
chr1.207120301.207120600	10
chr1.207227401.207227700	1
chr1.208115701.208116000	1
chr1.2082601.2082900	3
chr1.208389001.208389300	16
chr1.208419601.208419900	11
chr1.209406001.209406300	2
chr1.209601001.209601300	1
chr1.20961901.20962200	1
chr1.20989201.20989500	43
chr1.20989501.20989800	9
chr1.209978101.209978400	26
chr1.209978701.209979000	2
chr1.209979001.209979300	42
chr1.210002101.210002400	1
chr1.210002701.210003000	8
chr1.210109501.210109800	1
chr1.21021301.21021600	1
chr1.21021601.21021900	1
chr1.21024301.21024600	1
chr1.21030601.21030900	52
chr1.21032401.21032700	3
chr1.21043201.21043500	11
chr1.21045301.21045600	1
chr1.21045901.21046200	9
chr1.210500401.210500700	1
chr1.21057301.21057600	3
chr1.21061201.21061500	2
chr1.211308301.211308600	21
chr1.211430401.211430700	2
chr1.2114701.2115000	1
chr1.211499101.211499400	1
chr1.2116501.2116800	14
chr1.2116801.2117100	6
chr1.211686301.211686600	3
chr1.211689301.211689600	3
chr1.211690801.211691100	5
chr1.2117101.2117400	27
chr1.211713001.211713300	1
chr1.211849801.211850100	3
chr1.2119801.2120100	10
chr1.212658001.212658300	4
chr1.212672101.212672400	1
chr1.212865001.212865300	3
chr1.212870401.212870700	5
chr1.212967301.212967600	1
chr1.213029401.213029700	1
chr1.213030301.213030600	3
chr1.213083401.213083700	21
chr1.213090301.213090600	1
chr1.213124801.213125100	17
chr1.213152701.213153000	10
chr1.213223201.213223500	5
chr1.213223501.213223800	1
chr1.213901501.213901800	12
chr1.2140201.2140500	1
chr1.2142301.2142600	13
chr1.2145001.2145300	1
chr1.214726201.214726500	2
chr1.215043601.215043900	25
chr1.215044801.215045100	1
chr1.21550501.21550800	2
chr1.21553801.21554100	3
chr1.215738401.215738700	9
chr1.2161201.2161500	2
chr1.21615301.21615600	1
chr1.21615901.21616200	7
chr1.2163001.2163300	13
chr1.21655501.21655800	6
chr1.21672901.21673200	61
chr1.21757801.21758100	9
chr1.21762901.21763200	90
chr1.21765601.21765900	5
chr1.218666101.218666400	3
chr1.21894901.21895200	1
chr1.21895201.21895500	1
chr1.21930601.21930900	38
chr1.21948301.21948600	32
chr1.21975901.21976200	16
chr1.219784201.219784500	4
chr1.219786601.219786900	1
chr1.21993001.21993300	7
chr1.220220401.220220700	1
chr1.220426801.220427100	3
chr1.22089001.22089300	4
chr1.2210401.2210700	5
chr1.221062201.221062500	5
chr1.221063101.221063400	1
chr1.221067601.221067900	7
chr1.22111501.22111800	7
chr1.22141201.22141500	3
chr1.2214301.2214600	6
chr1.22149301.22149600	4
chr1.22149601.22149900	20
chr1.22154401.22154700	49
chr1.22155001.22155300	1
chr1.22155601.22155900	3
chr1.22189201.22189500	4
chr1.2220001.2220300	2
chr1.22213801.22214100	2
chr1.222789901.222790200	3
chr1.222819601.222819900	6
chr1.2232301.2232600	1
chr1.223252801.223253100	11
chr1.223315801.223316100	1
chr1.223742701.223743000	3
chr1.22380601.22380900	22
chr1.223936501.223936800	2
chr1.224031001.224031300	5
chr1.224031301.224031600	1
chr1.224034601.224034900	2
chr1.224034901.224035200	3
chr1.224182201.224182500	19
chr1.224300101.224300400	8
chr1.224368501.224368800	2
chr1.224369101.224369400	1
chr1.224369701.224370000	9
chr1.224393101.224393400	7
chr1.22456201.22456500	3
chr1.224719501.224719800	1
chr1.2247901.2248200	16
chr1.2249101.2249400	1
chr1.2252101.2252400	85
chr1.2256001.2256300	2
chr1.2256601.2256900	3
chr1.225660901.225661200	26
chr1.225865201.225865500	10
chr1.2259601.2259900	1
chr1.225995401.225995700	1
chr1.225997201.225997500	1
chr1.226074601.226074900	2
chr1.226109701.226110000	6
chr1.226112401.226112700	3
chr1.22612201.22612500	17
chr1.226188301.226188600	1
chr1.226251901.226252200	3
chr1.226269001.226269300	4
chr1.226271401.226271700	3
chr1.226315201.226315500	7
chr1.226376701.226377000	16
chr1.226409401.226409700	4
chr1.226412101.226412400	4
chr1.226412401.226412700	8
chr1.2265901.2266200	9
chr1.2267101.2267400	2
chr1.226828201.226828500	5
chr1.226828501.226828800	2
chr1.226830901.226831200	2
chr1.226889101.226889400	15
chr1.226893001.226893300	8
chr1.22692001.22692300	1
chr1.22692301.22692600	2
chr1.226923301.226923600	36
chr1.227129401.227129700	2
chr1.227161801.227162100	3
chr1.227164801.227165100	2
chr1.227681101.227681400	12
chr1.227681701.227682000	124
chr1.227730901.227731200	2
chr1.227747101.227747400	1
chr1.227748901.227749200	1
chr1.227752201.227752500	1
chr1.22777201.22777500	6
chr1.2277901.2278200	12
chr1.22779601.22779900	1
chr1.2278201.2278500	3
chr1.227920501.227920800	2
chr1.227973601.227973900	6
chr1.228003601.228003900	1
chr1.228003901.228004200	1
chr1.228075301.228075600	10
chr1.228077701.228078000	4
chr1.228110701.228111000	6
chr1.228111901.228112200	18
chr1.228132601.228132900	2
chr1.228137101.228137400	1
chr1.228159601.228159900	7
chr1.228197701.228198000	1
chr1.228248701.228249000	3
chr1.228268501.228268800	3
chr1.22829101.22829400	1
chr1.228338401.228338700	1
chr1.228344701.228345000	2
chr1.228351601.228351900	9
chr1.228360301.228360600	4
chr1.228360601.228360900	11
chr1.228361201.228361500	3
chr1.228363001.228363300	1
chr1.228398401.228398700	1
chr1.228399901.228400200	1
chr1.228400501.228400800	1
chr1.228405901.228406200	2
chr1.228406801.228407100	3
chr1.228460501.228460800	9
chr1.228461701.228462000	1
chr1.228465901.228466200	1
chr1.228466201.228466500	5
chr1.228473401.228473700	1
chr1.228475801.228476100	4
chr1.228505201.228505500	3
chr1.228509701.228510000	3
chr1.228510901.228511200	2
chr1.228558001.228558300	2
chr1.228563701.228564000	1
chr1.228582901.228583200	6
chr1.228584401.228584700	1
chr1.228602101.228602400	6
chr1.228606001.228606300	2
chr1.228614101.228614400	1
chr1.228615001.228615300	22
chr1.228673201.228673500	1
chr1.228686101.228686400	9
chr1.228742201.228742500	1
chr1.228744001.228744300	3
chr1.228744301.228744600	1
chr1.228752701.228753000	2
chr1.228759601.228759900	1
chr1.228869401.228869700	3
chr1.22904101.22904400	2
chr1.22918801.22919100	1
chr1.22926601.22926900	4
chr1.22927801.22928100	4
chr1.22928701.22929000	11
chr1.229365901.229366200	1
chr1.229408201.229408500	23
chr1.229644601.229644900	4
chr1.229692301.229692600	4
chr1.229729801.229730100	1
chr1.229731601.229731900	3
chr1.22973701.22974000	4
chr1.229759201.229759500	4
chr1.230241301.230241600	107
chr1.230259001.230259300	2
chr1.23038801.23039100	3
chr1.23039101.23039400	16
chr1.23040301.23040600	1
chr1.230415601.230415900	1
chr1.230468701.230469000	2
chr1.230469301.230469600	1
chr1.230492401.230492700	4
chr1.230493901.230494200	3
chr1.230494801.230495100	2
chr1.231006001.231006300	2
chr1.231036901.231037200	4
chr1.231173101.231173400	10
chr1.231178501.231178800	2
chr1.231294301.231294600	2
chr1.231531901.231532200	1
chr1.231666001.231666300	76
chr1.231666301.231666600	3
chr1.231869401.231869700	2
chr1.232352701.232353000	11
chr1.232449901.232450200	2
chr1.232767601.232767900	1
chr1.23278201.23278500	1
chr1.23279401.23279700	9
chr1.23282401.23282700	2
chr1.232938901.232939200	22
chr1.233123401.233123700	20
chr1.2333101.2333400	2
chr1.23343601.23343900	3
chr1.23344201.23344500	6
chr1.2340301.2340600	1
chr1.234342001.234342300	3
chr1.234559501.234559800	1
chr1.234625801.234626100	1
chr1.2346601.2346900	5
chr1.234792901.234793200	1
chr1.234852301.234852600	3
chr1.234881401.234881700	4
chr1.235011301.235011600	23
chr1.23503201.23503500	11
chr1.235152001.235152300	6
chr1.235186501.235186800	2
chr1.235242301.235242600	2
chr1.235322401.235322700	39
chr1.235804801.235805100	2
chr1.235805401.235805700	12
chr1.235836601.235836900	4
chr1.235836901.235837200	1
chr1.2360101.2360400	2
chr1.236157601.236157900	47
chr1.236442901.236443200	2
chr1.236446501.236446800	5
chr1.236765401.236765700	9
chr1.236848801.236849100	9
chr1.236849101.236849400	1
chr1.23693401.23693700	22
chr1.236961001.236961300	2
chr1.2369701.2370000	1
chr1.23751901.23752200	2
chr1.23752501.23752800	1
chr1.238106701.238107000	2
chr1.2385901.2386200	16
chr1.2386801.2387100	93
chr1.2387101.2387400	7
chr1.2388301.2388600	11
chr1.23894101.23894400	1
chr1.2389801.2390100	5
chr1.23917201.23917500	1
chr1.23945101.23945400	2
chr1.2396701.2397000	1
chr1.2400601.2400900	1
chr1.240163201.240163500	1
chr1.24016501.24016800	3
chr1.240308101.240308400	1
chr1.240370801.240371100	7
chr1.240371101.240371400	99
chr1.240371401.240371700	14
chr1.240569101.240569400	159
chr1.240569701.240570000	2
chr1.24063601.24063900	4
chr1.240655201.240655500	3
chr1.240656401.240656700	3
chr1.2408701.2409000	1
chr1.240874501.240874800	1
chr1.2409301.2409600	2
chr1.240987601.240987900	1
chr1.24104101.24104400	15
chr1.2415601.2415900	1
chr1.241588201.241588500	1
chr1.2415901.2416200	1
chr1.241696201.241696500	50
chr1.2417401.2417700	3
chr1.242013301.242013600	7
chr1.242686801.242687100	19
chr1.24284701.24285000	2
chr1.24307801.24308100	2
chr1.2435401.2435700	1
chr1.243649501.243649800	40
chr1.243649801.243650100	6
chr1.243650701.243651000	1
chr1.243651001.243651300	7
chr1.243653701.243654000	63
chr1.2439001.2439300	1
chr1.2441701.2442000	1
chr1.2442001.2442300	27
chr1.244467601.244467900	2
chr1.244534801.244535100	1
chr1.244617001.244617300	2
chr1.2446801.2447100	2
chr1.2447401.2447700	1
chr1.2448001.2448300	1
chr1.244815301.244815600	4
chr1.244892101.244892400	1
chr1.24512701.24513000	6
chr1.245130901.245131200	12
chr1.245315401.245315700	37
chr1.245496601.245496900	5
chr1.245499901.245500200	23
chr1.2456401.2456700	1
chr1.245739301.245739600	4
chr1.245742901.245743200	2
chr1.245840101.245840400	1
chr1.245848201.245848500	2
chr1.245848801.245849100	1
chr1.245851801.245852100	2
chr1.2459401.2459700	1
chr1.2460001.2460300	1
chr1.246139201.246139500	6
chr1.246139801.246140100	6
chr1.246414301.246414600	1
chr1.2465101.2465400	6
chr1.2466301.2466600	1
chr1.246845101.246845400	4
chr1.2469001.2469300	1
chr1.246951601.246951900	5
chr1.246951901.246952200	10
chr1.247093201.247093500	12
chr1.247169701.247170000	32
chr1.247170301.247170600	9
chr1.247243501.247243800	1
chr1.2472601.2472900	104
chr1.247268401.247268700	3
chr1.247279201.247279500	2
chr1.247465801.247466100	1
chr1.247493401.247493700	1
chr1.247614601.247614900	1
chr1.247615201.247615500	1
chr1.247695001.247695300	1
chr1.247803001.247803300	1
chr1.248022001.248022300	5
chr1.248098501.248098800	1
chr1.248099701.248100000	3
chr1.24831601.24831900	8
chr1.248894401.248894700	1
chr1.249105601.249105900	2
chr1.249106201.249106500	110
chr1.249134401.249134700	1
chr1.249165301.249165600	1
chr1.24969001.24969300	2
chr1.25069501.25069800	87
chr1.25070701.25071000	5
chr1.25071001.25071300	1
chr1.25074001.25074300	1
chr1.2520301.2520600	107
chr1.25226701.25227000	8
chr1.25227001.25227300	2
chr1.25229401.25229700	2
chr1.25230601.25230900	1
chr1.25236901.25237200	10
chr1.2525101.2525400	1
chr1.25257301.25257600	5
chr1.2526001.2526300	10
chr1.2526601.2526900	14
chr1.25273501.25273800	43
chr1.2528701.2529000	14
chr1.2529001.2529300	2
chr1.25292401.25292700	3
chr1.25319101.25319400	1
chr1.25357501.25357800	9
chr1.25357801.25358100	1
chr1.2538001.2538300	1
chr1.2538901.2539200	3
chr1.2561101.2561400	5
chr1.2575501.2575800	1
chr1.25869001.25869300	30
chr1.26022301.26022600	8
chr1.26098501.26098800	3
chr1.26186701.26187000	1
chr1.26247901.26248200	1
chr1.26439601.26439900	1
chr1.26440501.26440800	1
chr1.26490901.26491200	14
chr1.26491201.26491500	9
chr1.26496901.26497200	44
chr1.26497201.26497500	6
chr1.26498101.26498400	19
chr1.26634601.26634900	2
chr1.26670901.26671200	11
chr1.26687701.26688000	4
chr1.26688301.26688600	7
chr1.26828101.26828400	1
chr1.26907301.26907600	3
chr1.27001.27300	1
chr1.2704201.2704500	2
chr1.2707201.2707500	8
chr1.27142501.27142800	9
chr1.27142801.27143100	1
chr1.27144001.27144300	1
chr1.2715601.2715900	1
chr1.2715901.2716200	45
chr1.27189301.27189600	1
chr1.27189601.27189900	1
chr1.27228001.27228300	7
chr1.27287701.27288000	1
chr1.27321901.27322200	25
chr1.27322201.27322500	2
chr1.27333001.27333300	1
chr1.27339901.27340200	7
chr1.27353701.27354000	2
chr1.27384301.27384600	2
chr1.27482401.27482700	10
chr1.27525901.27526200	2
chr1.27526201.27526500	1
chr1.27528001.27528300	1
chr1.27675301.27675600	1
chr1.27675601.27675900	7
chr1.27678901.27679200	2
chr1.27687301.27687600	1
chr1.27687901.27688200	7
chr1.27689701.27690000	3
chr1.27690301.27690600	2
chr1.27690901.27691200	1
chr1.2770201.2770500	9
chr1.27720601.27720900	2
chr1.2774401.2774700	7
chr1.2775901.2776200	4
chr1.2777101.2777400	34
chr1.2778001.2778300	1
chr1.2779201.2779500	1
chr1.27817501.27817800	3
chr1.27891301.27891600	14
chr1.27893701.27894000	1
chr1.27894001.27894300	1
chr1.27939901.27940200	1
chr1.27940801.27941100	45
chr1.27941701.27942000	1
chr1.28050601.28050900	1
chr1.28216801.28217100	1
chr1.28242301.28242600	1
chr1.28284901.28285200	145
chr1.2829601.2829900	3
chr1.28416901.28417200	3
chr1.28481101.28481400	1
chr1.2848501.2848800	1
chr1.28488301.28488600	5
chr1.28495501.28495800	1
chr1.28571701.28572000	18
chr1.28583701.28584000	2
chr1.28588801.28589100	1
chr1.28641601.28641900	5
chr1.28654801.28655100	2
chr1.28656601.28656900	14
chr1.28694101.28694400	1
chr1.28697401.28697700	3
chr1.2876101.2876400	2
chr1.28856701.28857000	1
chr1.2886601.2886900	12
chr1.28880701.28881000	3
chr1.2888401.2888700	12
chr1.28909501.28909800	1
chr1.28917001.28917300	1
chr1.28917301.28917600	1
chr1.28917601.28917900	4
chr1.28920601.28920900	2
chr1.28920901.28921200	2
chr1.29061901.29062200	2
chr1.29065201.29065500	1
chr1.29103001.29103300	3
chr1.29139601.29139900	2
chr1.29139901.29140200	3
chr1.29188501.29188800	1
chr1.29188801.29189100	1
chr1.29189701.29190000	12
chr1.2919301.2919600	20
chr1.2920201.2920500	1
chr1.29214901.29215200	11
chr1.2927701.2928000	6
chr1.2929501.2929800	4
chr1.2929801.2930100	2
chr1.2930701.2931000	2
chr1.2931001.2931300	5
chr1.2937001.2937300	1
chr1.2938501.2938800	3
chr1.29447401.29447700	11
chr1.29462401.29462700	7
chr1.29509201.29509500	2
chr1.29583601.29583900	13
chr1.29807101.29807400	1
chr1.2980801.2981100	14
chr1.2992201.2992500	2
chr1.2992501.2992800	18
chr1.2998201.2998500	2
chr1.2998801.2999100	1
chr1.3000001.3000300	8
chr1.3001801.3002100	1
chr1.30582601.30582900	19
chr1.3070201.3070500	1
chr1.3070501.3070800	3
chr1.3072001.3072300	9
chr1.3073201.3073500	1
chr1.3074101.3074400	16
chr1.3083101.3083400	1
chr1.3086701.3087000	4
chr1.3100501.3100800	2
chr1.3103201.3103500	1
chr1.3104701.3105000	1
chr1.3106201.3106500	10
chr1.3107101.3107400	10
chr1.31190701.31191000	6
chr1.31192801.31193100	1
chr1.31193701.31194000	42
[truncated: 21,472 more rows]

## Sheet: 10_5_AML
DMR	N_of_occurrence
[truncated: 12,776 more rows]

[truncated: 15 more sheets: 10_5_BRCA, 10_5_CRC, 10_5_PDAC, 10_5_BLCA, 10_5_Normal, 10_5_LUC, 10_5_RCC, 10_4_AML, 10_4_BRCA, 10_4_CRC, 10_4_PDAC, 10_4_BLCA, 10_4_Normal, 10_4_LUC, 10_4_RCC]
